# Supplementary material for: Prospective evaluation of a rapid diagnostic test for Trypanosoma brucei gambiense infection developed using recombinant antigens
Source: PLoS Negl Trop Dis. 2018 Mar 28;12(3):e0006386. doi: 10.1371/journal.pntd.0006386 (PMC5898764; doi:10.1371/journal.pntd.0006386)
Supplement: S1 Data — (CSV) [file pntd.0006386.s006.csv]

patient_id	clinic_name	H_prev_tx	H_HCT_result	H_CSF_result	mAECT_result	mAECT_lp_result_1	LP_result	CATT_fresh_read1	CATT_fresh_read2	RDTfresh_read1	RDTfresh_read2	RDTfresh_B1_read1	RDTfresh_B1_read2	RDTfresh_B2_read1	RDTfresh_B2_read2	RDTfresh_2ndGen_read1	RDTfresh_2ndGen_read2	RDTfresh_B1_2ndGen_read1	RDTfresh_B1_2ndGen_read2	RDTfresh_B2_2ndGen_read1	RDTfresh_B2_2ndGen_read2	discordant	data_entry_id	Enrol_d	RDTfresh_B1_spec	H_CSF_WBC	IC_provided	H_age	CATT_read1_amb	CATT_read2_amb	data_study_id	DIAGNOSIS	CASE	CLINIC	CLINIC_TYPE	ADDED	RDTfresh_B1_read1_summary_NUM	RDTfresh_B1_read2_summary_NUM	RDTfresh_B2_read1_summary_NUM	RDTfresh_B2_read2_summary_NUM	RDTfresh_B1_2ndGen_read1_summary_NUM	RDTfresh_B1_2ndGen_read2_summary_NUM	RDTfresh_B2_2ndGen_read1_summary_NUM	RDTfresh_B2_2ndGen_read2_summary_NUM	RDTfresh_B1_read1_summary	RDTfresh_B1_read2_summary	RDTfresh_B2_read1_summary	RDTfresh_B2_read2_summary	RDTfresh_B1_2ndGen_read1_summary
Q001	HGR YASA-BONGA	No	Neg	NA	Neg	Neg	NA	Neg	Neg	Neg	Neg	0	0	0	0	Pos	Pos	0	0	1+	1+	NA	0	01/06/2015	NA	NA	Yes	7	Not ambiguous	Not ambiguous	2	Neg	FALSE	Q	Fixed	FALSE	0	0	0	0	0	0	1	1	Neg	Neg	Neg	Neg	Neg
Q002	HGR YASA-BONGA	No	Neg	NA	Neg	Neg	Neg	Neg	Neg	Neg	Neg	0	0	0	0	Pos	Pos	1+	1+	0	0	NA	0	01/06/2015	NA	NA	Yes	61	Not ambiguous	Not ambiguous	4	Neg	FALSE	Q	Fixed	FALSE	0	0	0	0	1	1	0	0	Neg	Neg	Neg	Neg	Pos
Q003	HGR YASA-BONGA	No	Neg	NA	Neg	Neg	Neg	Neg	Neg	Neg	Neg	0	0	0	0	Pos	Pos	1+	1+	0	2+	NA	0	01/06/2015	NA	NA	Yes	36	Not ambiguous	Not ambiguous	6	Neg	FALSE	Q	Fixed	FALSE	0	0	0	0	1	1	0	1	Neg	Neg	Neg	Neg	Pos
Q004	HGR YASA-BONGA	No	Neg	NA	Neg	Neg	NA	Pos	Neg	Neg	Neg	0	0	0	0	Neg	Neg	0	0	0	0	NA	0	01/06/2015	NA	NA	Yes	60	Not ambiguous	Not ambiguous	8	Neg	FALSE	Q	Fixed	FALSE	0	0	0	0	0	0	0	0	Neg	Neg	Neg	Neg	Neg
Q007	HGR YASA-BONGA	No	Neg	NA	Neg	Neg	NA	Neg	Neg	Neg	Neg	0	0	0	0	Pos	Pos	0	0	1+	1+	NA	0	01/06/2015	NA	NA	Yes	46	Not ambiguous	Not ambiguous	10	Neg	FALSE	Q	Fixed	FALSE	0	0	0	0	0	0	1	1	Neg	Neg	Neg	Neg	Neg
Q010	HGR YASA-BONGA	No	Neg	NA	Neg	Neg	NA	Pos	Pos	Neg	Neg	0	0	0	0	Neg	Neg	0	0	0	0	NA	0	01/06/2015	NA	NA	Yes	22	Not ambiguous	Not ambiguous	14	Neg	FALSE	Q	Fixed	FALSE	0	0	0	0	0	0	0	0	Neg	Neg	Neg	Neg	Neg
Q011	HGR YASA-BONGA	No	Neg	NA	Neg	Neg	NA	Pos	Pos	Neg	Neg	0	0	0	0	Neg	Neg	0	0	0	0	NA	0	01/06/2015	NA	NA	Yes	8	Not ambiguous	Not ambiguous	16	Neg	FALSE	Q	Fixed	FALSE	0	0	0	0	0	0	0	0	Neg	Neg	Neg	Neg	Neg
Q074	HGR YASA-BONGA	No	Neg	NA	Neg	Neg	NA	Neg	Neg	Pos	Pos	1+	1+	1+	1+	Neg	Neg	0	0	0	0	NA	0	08/06/2015	2	NA	Yes	16	Not ambiguous	Not ambiguous	22	Neg	FALSE	Q	Fixed	FALSE	1	1	1	1	0	0	0	0	Pos	Pos	Pos	Pos	Neg
Q016	HGR YASA-BONGA	No	Neg	NA	Neg	Neg	NA	Pos	Pos	Neg	Neg	0	0	0	0	Neg	Neg	0	0	0	0	NA	0	03/06/2015	NA	NA	Yes	59	Not ambiguous	Not ambiguous	24	Neg	FALSE	Q	Fixed	FALSE	0	0	0	0	0	0	0	0	Neg	Neg	Neg	Neg	Neg
Q017	HGR YASA-BONGA	No	Neg	NA	Neg	Neg	NA	Pos	Pos	Neg	Neg	0	0	0	0	Neg	Neg	0	0	0	0	NA	0	03/06/2015	NA	NA	Yes	55	Not ambiguous	Not ambiguous	26	Neg	FALSE	Q	Fixed	FALSE	0	0	0	0	0	0	0	0	Neg	Neg	Neg	Neg	Neg
Q018	HGR YASA-BONGA	No	Neg	NA	Neg	Neg	NA	Pos	Pos	Neg	Neg	0	0	0	0	Neg	Neg	0	0	0	0	NA	0	03/06/2015	NA	NA	Yes	56	Not ambiguous	Not ambiguous	28	Neg	FALSE	Q	Fixed	FALSE	0	0	0	0	0	0	0	0	Neg	Neg	Neg	Neg	Neg
Q020	HGR YASA-BONGA	No	Neg	NA	Neg	Neg	NA	Pos	Pos	Neg	Neg	0	0	0	0	Neg	Neg	0	0	0	0	NA	0	03/06/2015	NA	NA	Yes	30	Not ambiguous	Not ambiguous	30	Neg	FALSE	Q	Fixed	FALSE	0	0	0	0	0	0	0	0	Neg	Neg	Neg	Neg	Neg
Q024	HGR YASA-BONGA	No	Neg	NA	Neg	Neg	NA	Neg	Neg	Pos	Pos	3+	3+	2+	2+	Neg	Neg	0	0	0	0	NA	0	03/06/2015	NA	NA	Yes	24	Not ambiguous	Not ambiguous	32	Neg	FALSE	Q	Fixed	FALSE	1	1	1	1	0	0	0	0	Pos	Pos	Pos	Pos	Neg
Q025	HGR YASA-BONGA	No	Neg	NA	Neg	Neg	NA	Pos	Pos	Neg	Neg	0	0	0	0	Neg	Neg	0	0	0	0	NA	0	03/06/2015	NA	NA	Yes	19	Not ambiguous	Not ambiguous	34	Neg	FALSE	Q	Fixed	FALSE	0	0	0	0	0	0	0	0	Neg	Neg	Neg	Neg	Neg
Q029	HGR YASA-BONGA	No	Neg	NA	Neg	Neg	Neg	Pos	Pos	Pos	Pos	1+	1+	0	0	Neg	Neg	0	0	0	0	NA	0	03/06/2015	14	NA	Yes	17	Not ambiguous	Not ambiguous	36	Neg	FALSE	Q	Fixed	FALSE	1	1	0	0	0	0	0	0	Pos	Pos	Neg	Neg	Neg
Q073	HGR YASA-BONGA	No	Neg	NA	Neg	Neg	NA	Neg	Neg	Neg	Neg	0	0	0	0	Pos	Pos	3+	3+	0	0	NA	0	06/06/2015	NA	NA	Yes	6	Not ambiguous	Not ambiguous	40	Neg	FALSE	Q	Fixed	FALSE	0	0	0	0	1	1	0	0	Neg	Neg	Neg	Neg	Pos
Q076	HGR YASA-BONGA	No	Neg	NA	Neg	Neg	NA	Neg	Neg	Neg	Neg	0	0	0	0	Pos	Pos	1+	1+	1+	1+	NA	0	08/06/2015	NA	NA	Yes	5	Not ambiguous	Not ambiguous	42	Neg	FALSE	Q	Fixed	FALSE	0	0	0	0	1	1	1	1	Neg	Neg	Neg	Neg	Pos
Q096	HGR YASA-BONGA	No	Neg	NA	Neg	Neg	NA	Pos	Pos	Neg	Neg	0	0	0	0	Neg	Neg	0	0	0	0	NA	0	10/06/2015	NA	NA	Yes	50	Not ambiguous	Not ambiguous	44	Neg	FALSE	Q	Fixed	FALSE	0	0	0	0	0	0	0	0	Neg	Neg	Neg	Neg	Neg
Q097	HGR YASA_BONGA	No	Neg	NA	Neg	Neg	NA	Pos	Pos	Neg	Neg	0	0	0	0	Neg	Neg	0	0	0	0	NA	0	10/06/2015	NA	NA	Yes	5	Not ambiguous	Not ambiguous	46	Neg	FALSE	Q	Fixed	FALSE	0	0	0	0	0	0	0	0	Neg	Neg	Neg	Neg	Neg
Q103	HGR YASA-BONGA	No	Neg	NA	Neg	Neg	NA	Neg	Neg	Neg	Neg	0	0	0	0	Pos	Pos	1+	1+	1+	1+	NA	0	10/06/2015	NA	NA	Yes	4	Not ambiguous	Not ambiguous	48	Neg	FALSE	Q	Fixed	FALSE	0	0	0	0	1	1	1	1	Neg	Neg	Neg	Neg	Pos
Q106	HGR YASA-BONGA	No	Neg	NA	Neg	Neg	Neg	Neg	Neg	Pos	Pos	1+	1+	0	0	Neg	Neg	0	0	0	0	NA	0	10/06/2015	25	NA	Yes	31	Not ambiguous	Not ambiguous	50	Neg	FALSE	Q	Fixed	FALSE	1	1	0	0	0	0	0	0	Pos	Pos	Neg	Neg	Neg
Q108	HGR YASA-BONGA	No	Neg	NA	Neg	Neg	NA	Neg	Neg	Pos	Pos	0	0	1+	1+	Pos	Pos	0	0	1+	1+	NA	0	10/06/2015	NA	NA	Yes	23	Not ambiguous	Not ambiguous	52	Neg	FALSE	Q	Fixed	FALSE	0	0	1	1	0	0	1	1	Neg	Neg	Pos	Pos	Neg
Q110	HGR YASA-BONGA	No	Neg	NA	Neg	Neg	Neg	Neg	Neg	Neg	Neg	0	0	0	0	Pos	Pos	0	0	3+	3+	NA	0	10/06/2015	NA	NA	Yes	21	Not ambiguous	Not ambiguous	54	Neg	FALSE	Q	Fixed	FALSE	0	0	0	0	0	0	1	1	Neg	Neg	Neg	Neg	Neg
Q111	HGR YASA-BONGA	No	Neg	NA	Neg	Neg	NA	Neg	Neg	Pos	Pos	1+	1+	0	0	Neg	Neg	0	0	0	0	NA	0	10/06/2015	5	NA	Yes	33	Not ambiguous	Not ambiguous	56	Neg	FALSE	Q	Fixed	FALSE	1	1	0	0	0	0	0	0	Pos	Pos	Neg	Neg	Neg
Q116	HGR YASA-BONGA	No	Neg	NA	Neg	Neg	NA	Neg	Neg	Pos	Pos	1+	1+	0	0	Neg	Neg	0	0	0	0	NA	0	10/06/2015	25	NA	Yes	25	Not ambiguous	Not ambiguous	60	Neg	FALSE	Q	Fixed	FALSE	1	1	0	0	0	0	0	0	Pos	Pos	Neg	Neg	Neg
Q119	HGR YASA-BONGA	No	Neg	Neg	Pos	Pos	Neg	Pos	Pos	Pos	Pos	1+	1+	2+	2+	Pos	Pos	2+	2+	2+	2+	NA	0	10/06/2015	25	22	Yes	20	Not ambiguous	Not ambiguous	62	Pos	TRUE	Q	Fixed	FALSE	1	1	1	1	1	1	1	1	Pos	Pos	Pos	Pos	Pos
Q168	HGR YASA-BONGA	No	Neg	Neg	Pos	Pos	Neg	Pos	Pos	Pos	Pos	2+	2+	2+	2+	Pos	Pos	2+	2+	3+	2+	NA	0	13/06/2015	NA	22	Yes	43	Not ambiguous	Not ambiguous	66	Pos	TRUE	Q	Fixed	FALSE	1	1	1	1	1	1	1	1	Pos	Pos	Pos	Pos	Pos
C001275	UM/MUSHIE	No	Neg	NA	Neg	Neg	NA	Neg	Neg	Pos	Pos	1+	1+	1+	1+	Neg	Neg	0	0	0	0	NA	0	23/06/2015	32	NA	Yes	3	Not ambiguous	Not ambiguous	113	Neg	FALSE	C	Mobile	FALSE	1	1	1	1	0	0	0	0	Pos	Pos	Pos	Pos	Neg
C001564	UM/MUSHIE	No	Neg	NA	Neg	Neg	NA	Neg	Neg	Pos	Pos	1+	1+	1+	1+	Neg	Neg	0	0	0	0	NA	0	24/06/2015	23	NA	Yes	12	Not ambiguous	Not ambiguous	116	Neg	FALSE	C	Mobile	FALSE	1	1	1	1	0	0	0	0	Pos	Pos	Pos	Pos	Neg
C001904	UM/MUSHIE	No	Neg	NA	Neg	Neg	NA	Neg	Neg	Pos	Pos	1+	1+	1+	1+	Pos	Pos	1+	1+	1+	1+	NA	0	25/06/2015	17	NA	Yes	7	Not ambiguous	Not ambiguous	120	Neg	FALSE	C	Mobile	FALSE	1	1	1	1	1	1	1	1	Pos	Pos	Pos	Pos	Pos
C001956	UM/MUSHIE	No	Neg	NA	Neg	Neg	NA	Neg	Neg	Pos	Pos	1+	1+	1+	1+	Pos	Pos	1+	1+	1+	1+	NA	0	25/06/2015	42	NA	Yes	18	Not ambiguous	Not ambiguous	122	Neg	FALSE	C	Mobile	FALSE	1	1	1	1	1	1	1	1	Pos	Pos	Pos	Pos	Pos
C002104	UM/MUSHIE	No	Neg	NA	Neg	Neg	NA	Neg	Neg	Pos	Pos	1+	1+	1+	1+	Neg	Neg	0	0	0	0	NA	0	25/06/2015	38	NA	Yes	1	Not ambiguous	Not ambiguous	125	Neg	FALSE	C	Mobile	FALSE	1	1	1	1	0	0	0	0	Pos	Pos	Pos	Pos	Neg
C002019	UM/MUSHIE	No	Neg	NA	Neg	Neg	NA	Neg	Neg	Pos	Pos	1+	1+	1+	1+	Neg	Neg	0	0	0	0	NA	0	26/06/2015	100	NA	Yes	13	Not ambiguous	Not ambiguous	127	Neg	FALSE	C	Mobile	FALSE	1	1	1	1	0	0	0	0	Pos	Pos	Pos	Pos	Neg
C003920	UM/MUSHIE	No	Neg	NA	Neg	Neg	NA	Neg	Neg	Pos	Pos	1+	1+	1+	1+	Neg	Neg	0	0	0	0	NA	0	29/06/2015	35	NA	Yes	33	Not ambiguous	Not ambiguous	133	Neg	FALSE	C	Mobile	FALSE	1	1	1	1	0	0	0	0	Pos	Pos	Pos	Pos	Neg
E2797	IDIOFA	No	Neg	NA	Neg	Neg	NA	Pos	Pos	Neg	Neg	0	0	0	0	Neg	Neg	0	0	0	0	NA	0	20/06/2015	NA	NA	Yes	57	Not ambiguous	Not ambiguous	204	Neg	FALSE	E	Mobile	FALSE	0	0	0	0	0	0	0	0	Neg	Neg	Neg	Neg	Neg
E2760	IDIOFA	No	Neg	NA	Neg	Neg	NA	Pos	Pos	Neg	Neg	0	0	0	0	Neg	Neg	0	0	0	0	NA	0	20/06/2015	NA	NA	Yes	36	Not ambiguous	Not ambiguous	215	Neg	FALSE	E	Mobile	FALSE	0	0	0	0	0	0	0	0	Neg	Neg	Neg	Neg	Neg
E2757	IDIOFA	No	Neg	NA	Neg	Neg	NA	Pos	Pos	Neg	Neg	0	0	0	0	Neg	Neg	0	0	0	0	NA	0	20/06/2015	NA	NA	Yes	14	Not ambiguous	Not ambiguous	218	Neg	FALSE	E	Mobile	FALSE	0	0	0	0	0	0	0	0	Neg	Neg	Neg	Neg	Neg
E2750	IDIOFA	No	Neg	NA	Neg	Neg	NA	Pos	Pos	Neg	Neg	0	0	0	0	Neg	Neg	0	0	0	0	NA	0	18/06/2015	NA	NA	Yes	3	Not ambiguous	Not ambiguous	221	Neg	FALSE	E	Mobile	FALSE	0	0	0	0	0	0	0	0	Neg	Neg	Neg	Neg	Neg
E3228	IDIOFA	No	Neg	NA	Neg	Neg	NA	Pos	Pos	Pos	Pos	1+	1+	0	0	Pos	Pos	1+	1+	0	0	NA	0	21/06/2015	11	NA	Yes	48	Not ambiguous	Not ambiguous	227	Neg	FALSE	E	Mobile	FALSE	1	1	0	0	1	1	0	0	Pos	Pos	Neg	Neg	Pos
N484	MASAMUNA	No	Neg	Neg	Neg	Pos	NA	Pos	Pos	Pos	Pos	2+	2+	2+	2+	Pos	Pos	2+	2+	2+	2+	NA	0	14/07/2015	NA	93	Yes	45	Not ambiguous	Not ambiguous	234	Pos	TRUE	N	Fixed	FALSE	1	1	1	1	1	1	1	1	Pos	Pos	Pos	Pos	Pos
N525	MASAMUNA	No	Pos	Pos	Pos	Pos	Pos	Pos	Pos	Pos	Pos	2+	2+	2+	2+	Pos	Pos	2+	2+	2+	2+	NA	0	20/07/2015	NA	75	Yes	15	Not ambiguous	Not ambiguous	237	Pos	TRUE	N	Fixed	FALSE	1	1	1	1	1	1	1	1	Pos	Pos	Pos	Pos	Pos
N564	MASAMUNA	No	Neg	Neg	Pos	NA	NA	Pos	Pos	Pos	Pos	2+	2+	2+	2+	Pos	Pos	2+	2+	2+	2+	NA	0	23/07/2015	NA	6	Yes	21	Not ambiguous	Not ambiguous	240	Pos	TRUE	N	Fixed	FALSE	1	1	1	1	1	1	1	1	Pos	Pos	Pos	Pos	Pos
P472	HGR/MASIMANIMBA	Yes	NA	Pos	NA	NA	Pos	Pos	Pos	Pos	Pos	3+	3+	2+	3+	Pos	Pos	3+	3+	3+	3+	NA	0	24/07/2015	NA	1130	Yes	47	Not ambiguous	Not ambiguous	243	Pos	TRUE	P	Fixed	FALSE	1	1	1	1	1	1	1	1	Pos	Pos	Pos	Pos	Pos
P432	HGR/MASIMANIMBA	No	Neg	Pos	Pos	Pos	Neg	Pos	Pos	Pos	Pos	1+	1+	2+	2+	Pos	Pos	3+	3+	3+	2+	NA	0	20/07/2015	2	1730	Yes	20	Not ambiguous	Not ambiguous	245	Pos	TRUE	P	Fixed	FALSE	1	1	1	1	1	1	1	1	Pos	Pos	Pos	Pos	Pos
M265	HS DE KITOY	No	Neg	Pos	Pos	Neg	NA	Pos	Pos	Neg	Neg	0	0	0	0	Pos	Pos	1+	1+	2+	2+	NA	0	15/07/2015	NA	3	Yes	28	Not ambiguous	Not ambiguous	248	Pos	TRUE	M	Fixed	FALSE	0	0	0	0	1	1	1	1	Neg	Neg	Neg	Neg	Pos
M215	HS DE KITOY	No	Pos	Pos	Pos	Pos	Pos	Pos	Pos	Pos	Pos	3+	3+	3+	3+	Pos	Pos	2+	2+	2+	2+	NA	0	03/07/2015	NA	39	Yes	28	Ambiguous	Ambiguous	251	Pos	TRUE	M	Fixed	FALSE	1	1	1	1	1	1	1	1	Pos	Pos	Pos	Pos	Pos
P317	HGR/MASIMANIMBA	No	Neg	Neg	Pos	Pos	NA	Pos	Pos	Pos	Pos	1+	1+	1+	1+	Pos	Pos	2+	2+	1+	2+	NA	0	02/07/2015	5	6	Yes	25	Not ambiguous	Not ambiguous	255	Pos	TRUE	P	Fixed	FALSE	1	1	1	1	1	1	1	1	Pos	Pos	Pos	Pos	Pos
P314	HGR/MASIMANIMBA	No	NA	Pos	NA	NA	Pos	Pos	Pos	Pos	Pos	1+	1+	1+	1+	Pos	Pos	2+	2+	2+	2+	NA	0	01/07/2015	5	144	Yes	3	Not ambiguous	Not ambiguous	257	Pos	TRUE	P	Fixed	FALSE	1	1	1	1	1	1	1	1	Pos	Pos	Pos	Pos	Pos
N364	MASAMUNA	No	Pos	Neg	Pos	Pos	NA	Pos	Pos	Pos	Pos	2+	2+	2+	2+	Pos	Pos	2+	2+	3+	3+	NA	0	27/06/2015	NA	3	Yes	54	Not ambiguous	Not ambiguous	260	Pos	TRUE	N	Fixed	FALSE	1	1	1	1	1	1	1	1	Pos	Pos	Pos	Pos	Pos
N423	MASAMUNA	No	Pos	Neg	Pos	Pos	Pos	Pos	Pos	Pos	Pos	1+	1+	2+	2+	Pos	Pos	2+	2+	2+	2+	NA	0	07/07/2015	2	6	Yes	20	Not ambiguous	Not ambiguous	263	Pos	TRUE	N	Fixed	FALSE	1	1	1	1	1	1	1	1	Pos	Pos	Pos	Pos	Pos
A1321	UM/BDD	No	Neg	Neg	Pos	Neg	NA	Neg	Neg	Neg	Neg	0	0	0	0	Pos	Pos	4+	4+	0	0	NA	0	24/06/2015	NA	2	Yes	8	Not ambiguous	Not ambiguous	266	Pos	TRUE	A	Mobile	FALSE	0	0	0	0	1	1	0	0	Neg	Neg	Neg	Neg	Pos
A1214	UM/BDD	No	Neg	Neg	Neg	Neg	Pos	Neg	Neg	Neg	Neg	0	0	0	0	Pos	Pos	4+	4+	0	0	NA	0	22/06/2015	NA	2	Yes	32	Not ambiguous	Not ambiguous	269	Pos	TRUE	A	Mobile	FALSE	0	0	0	0	1	1	0	0	Neg	Neg	Neg	Neg	Pos
A1024	UM/BDD	No	Pos	Neg	NA	NA	Pos	Neg	Neg	Neg	Neg	0	0	0	0	Pos	Pos	4+	4+	0	0	NA	0	21/06/2015	NA	2	Yes	15	Not ambiguous	Not ambiguous	271	Pos	TRUE	A	Mobile	FALSE	0	0	0	0	1	1	0	0	Neg	Neg	Neg	Neg	Pos
A985	UM/BDD	No	NA	Neg	NA	NA	Pos	Neg	Neg	Pos	Pos	4+	4+	4+	4+	Neg	Neg	0	0	0	0	NA	0	21/06/2015	NA	32	Yes	41	Not ambiguous	Not ambiguous	274	Pos	TRUE	A	Mobile	FALSE	1	1	1	1	0	0	0	0	Pos	Pos	Pos	Pos	Neg
A888	UM/BDD	No	NA	Neg	NA	NA	Pos	Neg	Neg	Neg	Neg	0	0	0	0	Pos	Pos	4+	4+	0	0	NA	0	20/06/2015	NA	1	Yes	14	Not ambiguous	Not ambiguous	278	Pos	TRUE	A	Mobile	FALSE	0	0	0	0	1	1	0	0	Neg	Neg	Neg	Neg	Pos
A890	UM/BDD	No	NA	Neg	NA	NA	Pos	Neg	Neg	Neg	Neg	0	0	0	0	Pos	Pos	4+	4+	4+	4+	NA	0	20/06/2015	NA	3	Yes	17	Not ambiguous	Not ambiguous	281	Pos	TRUE	A	Mobile	FALSE	0	0	0	0	1	1	1	1	Neg	Neg	Neg	Neg	Pos
A537	UM/BDD	No	NA	Neg	NA	NA	Pos	Neg	Neg	Neg	Neg	0	0	0	0	Pos	Pos	4+	4+	0	0	NA	0	19/06/2015	NA	3	Yes	9	Not ambiguous	Not ambiguous	284	Pos	TRUE	A	Mobile	FALSE	0	0	0	0	1	1	0	0	Neg	Neg	Neg	Neg	Pos
A293	UM/BDD	No	NA	Neg	NA	NA	Pos	Pos	Pos	Neg	Neg	0	0	0	0	Neg	Neg	0	0	0	0	NA	0	17/06/2015	NA	3	Yes	15	Not ambiguous	Not ambiguous	286	Pos	TRUE	A	Mobile	FALSE	0	0	0	0	0	0	0	0	Neg	Neg	Neg	Neg	Neg
A154	UM/BDD	No	NA	Neg	NA	NA	Pos	Neg	Neg	Pos	Pos	4+	4+	0	0	Neg	Neg	0	0	0	0	NA	0	16/06/2015	NA	2	Yes	8	Not ambiguous	Not ambiguous	289	Pos	TRUE	A	Mobile	FALSE	1	1	0	0	0	0	0	0	Pos	Pos	Neg	Neg	Neg
A082	UM/BDD	No	Neg	Neg	Pos	Pos	Neg	Neg	Neg	Pos	Pos	1+	1+	0	0	Neg	Neg	0	0	0	0	NA	0	16/06/2015	25	3	Yes	11	Ambiguous	Not ambiguous	292	Pos	TRUE	A	Mobile	FALSE	1	1	0	0	0	0	0	0	Pos	Pos	Neg	Neg	Neg
C003851	UM/MUSHIE	No	Pos	Neg	NA	NA	NA	Neg	Neg	Pos	Pos	1+	1+	1+	1+	Pos	Pos	0	0	1+	1+	NA	0	29/06/2015	28	7	Yes	36	Not ambiguous	Not ambiguous	295	Pos	TRUE	C	Mobile	FALSE	1	1	1	1	0	0	1	1	Pos	Pos	Pos	Pos	Neg
C003127	UM/MUSHIE	No	Pos	Neg	NA	NA	NA	Neg	Neg	Pos	Pos	1+	1+	1+	1+	Neg	Neg	0	0	0	0	NA	0	28/06/2015	45	17	Yes	20	Not ambiguous	Not ambiguous	299	Pos	TRUE	C	Mobile	FALSE	1	1	1	1	0	0	0	0	Pos	Pos	Pos	Pos	Neg
C003260	UM/MUSHIE	No	Pos	Neg	NA	NA	NA	Pos	Pos	Pos	Pos	1+	1+	1+	1+	Pos	Pos	1+	1+	1+	1+	NA	0	28/06/2015	45	3	Yes	10	Not ambiguous	Not ambiguous	302	Pos	TRUE	C	Mobile	FALSE	1	1	1	1	1	1	1	1	Pos	Pos	Pos	Pos	Pos
C003114	UM/MUSHIE	No	Pos	Pos	NA	NA	NA	Pos	Pos	Neg	Neg	0	0	0	0	Pos	Pos	1+	1+	1+	1+	NA	0	28/06/2015	NA	177	Yes	15	Not ambiguous	Not ambiguous	304	Pos	TRUE	C	Mobile	FALSE	0	0	0	0	1	1	1	1	Neg	Neg	Neg	Neg	Pos
C001960	UM/MUSHIE	No	Pos	Neg	NA	NA	NA	Neg	Neg	Pos	Pos	1+	1+	1+	1+	Pos	Pos	1+	1+	1+	1+	NA	0	25/06/2015	32	20	Yes	14	Not ambiguous	Not ambiguous	307	Pos	TRUE	C	Mobile	FALSE	1	1	1	1	1	1	1	1	Pos	Pos	Pos	Pos	Pos
C00657	UM/MUSHIE	No	Neg	Neg	Pos	NA	NA	Neg	Neg	Neg	Neg	0	0	0	0	Pos	Pos	0	0	1+	1+	NA	0	21/06/2015	NA	3	Yes	26	Not ambiguous	Not ambiguous	310	Pos	TRUE	C	Mobile	FALSE	0	0	0	0	0	0	1	1	Neg	Neg	Neg	Neg	Neg
J117	HGR/BAGATA	No	Pos	Neg	NA	NA	NA	Neg	Neg	Neg	Neg	0	0	0	0	Pos	Pos	0	0	3+	3+	NA	0	27/06/2015	NA	7	Yes	27	Not ambiguous	Not ambiguous	312	Pos	TRUE	J	Fixed	FALSE	0	0	0	0	0	0	1	1	Neg	Neg	Neg	Neg	Neg
E3702	IDIOFA	No	Pos	Neg	Neg	Neg	NA	Pos	Pos	Neg	Neg	0	0	0	0	Pos	Pos	1+	1+	0	0	NA	0	24/06/2015	NA	3	Yes	25	Not ambiguous	Not ambiguous	315	Pos	TRUE	E	Mobile	FALSE	0	0	0	0	1	1	0	0	Neg	Neg	Neg	Neg	Pos
A1600	UM/BANDUNDU	No	NA	Neg	NA	NA	Pos	Pos	Pos	Pos	Pos	4+	4+	4+	4+	Pos	Pos	4+	4+	4+	4+	NA	0	26/06/2015	NA	5	Yes	49	Not ambiguous	Not ambiguous	321	Pos	TRUE	A	Mobile	FALSE	1	1	1	1	1	1	1	1	Pos	Pos	Pos	Pos	Pos
A1164	UM/BDD	No	NA	Neg	NA	NA	Pos	Neg	Neg	Pos	Pos	4+	4+	0	0	Neg	Neg	0	0	0	0	NA	0	22/06/2015	NA	2	Yes	18	Not ambiguous	Not ambiguous	323	Pos	TRUE	A	Mobile	FALSE	1	1	0	0	0	0	0	0	Pos	Pos	Neg	Neg	Neg
H016	CDTC BDD NORD	No	NA	Pos	NA	NA	Pos	Pos	Pos	Pos	Pos	1+	1+	1+	1+	Pos	Pos	1+	1+	1+	1+	NA	0	19/06/2015	8	252	Yes	21	Not ambiguous	Not ambiguous	328	Pos	TRUE	H	Fixed	FALSE	1	1	1	1	1	1	1	1	Pos	Pos	Pos	Pos	Pos
H009	CDTC BDD NORD	No	Pos	Pos	Pos	Pos	NA	Pos	Pos	Pos	Pos	1+	1+	1+	1+	Pos	Pos	1+	1+	1+	1+	NA	0	17/06/2015	11	223	Yes	46	Not ambiguous	Not ambiguous	330	Pos	TRUE	H	Fixed	FALSE	1	1	1	1	1	1	1	1	Pos	Pos	Pos	Pos	Pos
P151	HGR/MASIMANIMBA	No	Pos	Pos	Pos	Pos	Pos	Pos	Pos	Pos	Pos	2+	0	1+	2+	Pos	Pos	2+	2+	2+	2+	NA	0	09/06/2015	NA	744	Yes	38	Not ambiguous	Not ambiguous	333	Pos	TRUE	P	Fixed	FALSE	1	0	1	1	1	1	1	1	Pos	Neg	Pos	Pos	Pos
P184	HGR/MASIMANIMBA	No	Neg	Pos	Neg	Pos	Neg	Pos	Pos	Pos	Pos	1+	1+	2+	2+	Pos	Pos	3+	2+	2+	2+	NA	0	11/06/2015	25	31	Yes	16	Not ambiguous	Not ambiguous	336	Pos	TRUE	P	Fixed	FALSE	1	1	1	1	1	1	1	1	Pos	Pos	Pos	Pos	Pos
N036	MASAMUNA	No	Pos	Pos	Pos	Pos	NA	Pos	Pos	Pos	Pos	3+	3+	3+	3+	Pos	Pos	2+	3+	3+	3+	NA	0	27/05/2015	NA	103	Yes	36	Not ambiguous	Not ambiguous	339	Pos	TRUE	N	Fixed	FALSE	1	1	1	1	1	1	1	1	Pos	Pos	Pos	Pos	Pos
N044	MASAMUNA	No	Pos	Pos	Pos	Pos	Pos	Pos	Pos	Pos	Pos	2+	3+	2+	3+	Pos	Pos	3+	3+	3+	3+	NA	0	28/05/2015	NA	320	Yes	33	Not ambiguous	Not ambiguous	341	Pos	TRUE	N	Fixed	FALSE	1	1	1	1	1	1	1	1	Pos	Pos	Pos	Pos	Pos
N101	MASAMUNA	No	Neg	Neg	Neg	Pos	NA	Pos	Pos	Pos	Pos	1+	1+	1+	1+	Pos	Pos	2+	2+	2+	2+	NA	0	01/06/2015	2	115	Yes	20	Not ambiguous	Not ambiguous	344	Pos	TRUE	N	Fixed	FALSE	1	1	1	1	1	1	1	1	Pos	Pos	Pos	Pos	Pos
A039	UM/BDD	No	Neg	Neg	Pos	Neg	NA	Neg	Neg	Pos	Pos	4+	1+	4+	1+	Neg	Neg	0	0	0	0	NA	0	16/06/2015	NA	1	Yes	7	Ambiguous	Not ambiguous	347	Pos	TRUE	A	Mobile	FALSE	1	1	1	1	0	0	0	0	Pos	Pos	Pos	Pos	Neg
C002497	UM/MUSHIE	No	Neg	Neg	Pos	NA	NA	Neg	Neg	Neg	Neg	0	0	0	0	Pos	Pos	1+	1+	1+	1+	NA	0	27/06/2015	NA	12	Yes	20	Not ambiguous	Not ambiguous	350	Pos	TRUE	C	Mobile	FALSE	0	0	0	0	1	1	1	1	Neg	Neg	Neg	Neg	Pos
Q297	HGR YASA-BONGA	No	Neg	NA	Neg	Neg	NA	Neg	Neg	Neg	Neg	0	0	0	0	Pos	Pos	0	0	1+	1+	NA	0	22/06/2015	NA	NA	Yes	12	Not ambiguous	Not ambiguous	372	Neg	FALSE	Q	Fixed	FALSE	0	0	0	0	0	0	1	1	Neg	Neg	Neg	Neg	Neg
Q354	HGR YASA-BONGA	No	Neg	NA	Neg	Neg	Neg	Neg	Neg	Neg	Neg	0	0	0	0	Pos	Pos	0	0	1+	1+	NA	0	24/06/2015	NA	NA	Yes	32	Not ambiguous	Not ambiguous	375	Neg	FALSE	Q	Fixed	FALSE	0	0	0	0	0	0	1	1	Neg	Neg	Neg	Neg	Neg
Q467	HGR YASA-BONGA	No	Neg	NA	Neg	Neg	Neg	Neg	Neg	Neg	Neg	0	0	0	0	Pos	Pos	1+	1+	3+	3+	NA	0	09/07/2015	NA	NA	Yes	1	Not ambiguous	Not ambiguous	378	Neg	FALSE	Q	Fixed	FALSE	0	0	0	0	1	1	1	1	Neg	Neg	Neg	Neg	Pos
Q481	HGR YASA-BONGA	No	Neg	NA	Neg	Neg	NA	Neg	Neg	Pos	Pos	1+	1+	0	0	Neg	Neg	0	0	0	0	NA	0	09/07/2015	5	NA	Yes	21	Not ambiguous	Not ambiguous	380	Neg	FALSE	Q	Fixed	FALSE	1	1	0	0	0	0	0	0	Pos	Pos	Neg	Neg	Neg
Q469	HGR YASA-BONGA	No	Neg	NA	Neg	Neg	NA	Neg	Neg	Neg	Neg	0	0	0	0	Pos	Pos	0	0	1+	1+	NA	0	09/07/2015	NA	NA	Yes	3	Not ambiguous	Not ambiguous	383	Neg	FALSE	Q	Fixed	FALSE	0	0	0	0	0	0	1	1	Neg	Neg	Neg	Neg	Neg
Q498	HGR YASA-BONGA	No	Neg	NA	Neg	Neg	NA	Neg	Neg	Pos	Pos	1+	1+	0	0	Pos	Pos	0	0	1+	1+	NA	0	11/07/2015	4	NA	Yes	34	Not ambiguous	Not ambiguous	386	Neg	FALSE	Q	Fixed	FALSE	1	1	0	0	0	0	1	1	Pos	Pos	Neg	Neg	Neg
Q501	HGR YASA-BONGA	No	Neg	Neg	Neg	Neg	NA	Pos	Pos	Neg	Neg	0	0	0	0	Neg	Neg	0	0	0	0	NA	0	13/07/2015	NA	1	Yes	23	Not ambiguous	Not ambiguous	389	Neg	FALSE	Q	Fixed	FALSE	0	0	0	0	0	0	0	0	Neg	Neg	Neg	Neg	Neg
Q507	HGR YASA-BONGA	No	Neg	NA	Neg	Neg	NA	Pos	Pos	Neg	Neg	0	0	0	0	Neg	Neg	0	0	0	0	NA	0	13/07/2015	NA	NA	Yes	50	Not ambiguous	Not ambiguous	391	Neg	FALSE	Q	Fixed	FALSE	0	0	0	0	0	0	0	0	Neg	Neg	Neg	Neg	Neg
Q510	HGR YASA-BONGA	No	Neg	NA	Neg	Neg	NA	Pos	Pos	Neg	Neg	0	0	0	0	Neg	Neg	0	0	0	0	NA	0	13/07/2015	NA	NA	Yes	20	Not ambiguous	Not ambiguous	394	Neg	FALSE	Q	Fixed	FALSE	0	0	0	0	0	0	0	0	Neg	Neg	Neg	Neg	Neg
Q521	HGR YASA-BONGA	No	Neg	NA	Neg	Neg	Neg	Pos	Pos	Pos	Pos	0	0	1+	1+	Pos	Pos	0	0	1+	1+	NA	0	14/07/2015	NA	NA	Yes	19	Not ambiguous	Not ambiguous	396	Neg	FALSE	Q	Fixed	FALSE	0	0	1	1	0	0	1	1	Neg	Neg	Pos	Pos	Neg
Q527	HGR YASA-BONGA	No	Neg	Neg	Neg	Neg	NA	Neg	Neg	Neg	Neg	0	0	0	0	Neg	Neg	0	0	0	0	NA	0	15/07/2015	NA	2	Yes	68	Not ambiguous	Not ambiguous	399	Neg	FALSE	Q	Fixed	FALSE	0	0	0	0	0	0	0	0	Neg	Neg	Neg	Neg	Neg
Q536	HGR YASA-BONGA	No	Neg	Neg	Neg	Neg	Neg	Neg	Neg	Neg	Neg	0	0	0	0	Neg	Neg	0	0	0	0	NA	0	17/07/2015	NA	1	Yes	14	Not ambiguous	Not ambiguous	402	Neg	FALSE	Q	Fixed	FALSE	0	0	0	0	0	0	0	0	Neg	Neg	Neg	Neg	Neg
Q540	HGR YASA-BONGA	No	Neg	NA	Neg	Neg	Neg	Pos	Pos	Neg	Neg	0	0	0	0	Neg	Neg	0	0	0	0	NA	0	17/07/2015	NA	NA	Yes	15	Not ambiguous	Not ambiguous	406	Neg	FALSE	Q	Fixed	FALSE	0	0	0	0	0	0	0	0	Neg	Neg	Neg	Neg	Neg
Q543	HGR YASA-BONGA	No	Neg	NA	Neg	Neg	NA	Neg	Neg	Neg	Neg	0	0	0	0	Pos	Pos	1+	1+	0	0	NA	0	17/07/2015	NA	NA	Yes	20	Not ambiguous	Not ambiguous	409	Neg	FALSE	Q	Fixed	FALSE	0	0	0	0	1	1	0	0	Neg	Neg	Neg	Neg	Pos
Q567	HGR YASA-BONGA	No	Neg	NA	Neg	Neg	NA	Neg	Neg	Neg	Neg	0	0	0	0	Pos	Pos	1+	1+	0	0	NA	0	21/07/2015	NA	NA	Yes	65	Not ambiguous	Not ambiguous	412	Neg	FALSE	Q	Fixed	FALSE	0	0	0	0	1	1	0	0	Neg	Neg	Neg	Neg	Pos
Q569	HGR YASA-BONGA	No	Neg	NA	Neg	Neg	NA	Neg	Neg	Neg	Neg	0	0	0	0	Pos	Pos	1+	1+	0	0	NA	0	21/07/2015	NA	NA	Yes	2	Not ambiguous	Not ambiguous	414	Neg	FALSE	Q	Fixed	FALSE	0	0	0	0	1	1	0	0	Neg	Neg	Neg	Neg	Pos
Q563	HGR YASA-BONGA	No	Neg	NA	Neg	Neg	NA	Neg	Neg	Pos	Pos	1+	1+	0	0	Neg	Neg	0	0	0	0	NA	0	21/07/2015	25	NA	Yes	20	Not ambiguous	Not ambiguous	416	Neg	FALSE	Q	Fixed	FALSE	1	1	0	0	0	0	0	0	Pos	Pos	Neg	Neg	Neg
Q544	HGR/YASA-BONGA	No	Neg	NA	Neg	Neg	NA	Pos	Pos	Neg	Neg	0	0	0	0	Neg	Neg	0	0	0	0	NA	0	18/07/2015	NA	NA	Yes	30	Not ambiguous	Not ambiguous	419	Neg	FALSE	Q	Fixed	FALSE	0	0	0	0	0	0	0	0	Neg	Neg	Neg	Neg	Neg
Q545	HGR YASA-BONGA	No	Neg	NA	Neg	Neg	NA	Neg	Neg	Neg	Neg	0	0	0	0	Pos	Pos	1+	1+	0	0	NA	0	21/07/2015	NA	NA	Yes	2	Not ambiguous	Not ambiguous	423	Neg	FALSE	Q	Fixed	FALSE	0	0	0	0	1	1	0	0	Neg	Neg	Neg	Neg	Pos
J294	HGR/BAGATA	No	Neg	NA	Neg	Neg	NA	Neg	Neg	Neg	Neg	0	0	0	0	Neg	Neg	0	0	0	0	NA	0	21/07/2015	NA	NA	Yes	42	Not ambiguous	Not ambiguous	426	Neg	FALSE	J	Fixed	FALSE	0	0	0	0	0	0	0	0	Neg	Neg	Neg	Neg	Neg
J296	HGR/BAGATA	No	Neg	NA	Neg	Neg	NA	Neg	Neg	Neg	Neg	0	0	0	0	Pos	Pos	0	0	3+	3+	NA	0	21/07/2015	NA	NA	Yes	42	Not ambiguous	Not ambiguous	429	Neg	FALSE	J	Fixed	FALSE	0	0	0	0	0	0	1	1	Neg	Neg	Neg	Neg	Neg
J297	HGR/BAGATA	No	Neg	NA	Neg	Neg	NA	Neg	Neg	Neg	Neg	0	0	0	0	Pos	Pos	2+	2+	0	0	NA	0	21/07/2015	NA	NA	Yes	65	Not ambiguous	Not ambiguous	432	Neg	FALSE	J	Fixed	FALSE	0	0	0	0	1	1	0	0	Neg	Neg	Neg	Neg	Pos
J226	HGR/BAGATA	No	Neg	NA	Neg	Neg	NA	Neg	Neg	Neg	Neg	0	0	0	0	Neg	Neg	0	0	0	0	NA	0	13/07/2015	NA	NA	Yes	53	Not ambiguous	Not ambiguous	434	Neg	FALSE	J	Fixed	FALSE	0	0	0	0	0	0	0	0	Neg	Neg	Neg	Neg	Neg
J279	HGR/BAGATA	No	Neg	NA	Neg	Neg	NA	Neg	Neg	Neg	Neg	0	0	0	0	Pos	Pos	1+	1+	2+	2+	NA	0	17/07/2015	NA	NA	Yes	39	Not ambiguous	Not ambiguous	438	Neg	FALSE	J	Fixed	FALSE	0	0	0	0	1	1	1	1	Neg	Neg	Neg	Neg	Pos
J245	HGR/BAGATA	No	Neg	NA	Neg	Neg	NA	Neg	Neg	Neg	Neg	0	0	0	0	Pos	Pos	1+	1+	2+	2+	NA	0	14/07/2015	NA	NA	Yes	56	Not ambiguous	Not ambiguous	440	Neg	FALSE	J	Fixed	FALSE	0	0	0	0	1	1	1	1	Neg	Neg	Neg	Neg	Pos
J247	HGR/BAGATA	No	Neg	NA	Neg	Neg	NA	Neg	Neg	Neg	Neg	0	0	0	0	Pos	Pos	2+	2+	2+	2+	NA	0	14/07/2015	NA	NA	Yes	22	Not ambiguous	Not ambiguous	443	Neg	FALSE	J	Fixed	FALSE	0	0	0	0	1	1	1	1	Neg	Neg	Neg	Neg	Pos
J186	HGR/BAGATA	No	Neg	NA	Neg	Neg	NA	Neg	Neg	Neg	Neg	0	0	0	0	Pos	Pos	0	0	2+	2+	NA	0	07/07/2015	NA	NA	Yes	22	Not ambiguous	Not ambiguous	446	Neg	FALSE	J	Fixed	FALSE	0	0	0	0	0	0	1	1	Neg	Neg	Neg	Neg	Neg
H053	CDTC BDD N	No	Neg	NA	Neg	Neg	NA	Neg	Neg	Neg	Neg	0	0	0	0	Pos	Pos	0	1+	1+	1+	NA	0	08/07/2015	NA	NA	Yes	41	Not ambiguous	Not ambiguous	727	Neg	FALSE	H	Fixed	FALSE	0	0	0	0	0	1	1	1	Neg	Neg	Neg	Neg	Neg
H054	CDTC /BDD NORD	No	Neg	NA	Neg	Neg	NA	Neg	Neg	Neg	Neg	0	0	0	0	Pos	Pos	0	0	1+	1+	NA	0	10/07/2015	NA	NA	Yes	14	Not ambiguous	Not ambiguous	729	Neg	FALSE	H	Fixed	FALSE	0	0	0	0	0	0	1	1	Neg	Neg	Neg	Neg	Neg
H055	CDTC/BDD NORD	No	Neg	NA	Neg	Neg	NA	Neg	Neg	Neg	Neg	0	0	0	0	Pos	Pos	1+	0	1+	1+	NA	0	10/07/2015	NA	NA	Yes	7	Not ambiguous	Not ambiguous	731	Neg	FALSE	H	Fixed	FALSE	0	0	0	0	1	0	1	1	Neg	Neg	Neg	Neg	Pos
H056	CDTC BDD NORD	No	Neg	NA	Neg	Neg	NA	Neg	Neg	Neg	Neg	0	0	0	0	Pos	Pos	0	0	1+	1+	NA	0	10/07/2015	NA	NA	Yes	7	Not ambiguous	Not ambiguous	733	Neg	FALSE	H	Fixed	FALSE	0	0	0	0	0	0	1	1	Neg	Neg	Neg	Neg	Neg
H057	CDTC BDD NORD	No	Neg	NA	Neg	Neg	NA	Neg	Neg	Pos	Pos	1+	1+	0	0	Neg	Neg	0	0	0	0	NA	0	13/07/2015	3	NA	Yes	5	Not ambiguous	Not ambiguous	735	Neg	FALSE	H	Fixed	FALSE	1	1	0	0	0	0	0	0	Pos	Pos	Neg	Neg	Neg
H058	CDTC/BDD NORD	No	Neg	NA	Neg	Neg	NA	Neg	Neg	Neg	Neg	0	0	0	0	Pos	Pos	1+	1+	0	0	NA	0	13/07/2015	NA	NA	Yes	1	Not ambiguous	Not ambiguous	737	Neg	FALSE	H	Fixed	FALSE	0	0	0	0	1	1	0	0	Neg	Neg	Neg	Neg	Pos
H059	CDTC BDD NORD	No	Neg	NA	Neg	Neg	NA	Neg	Neg	Pos	Pos	1+	1+	1+	1+	Pos	Pos	1+	1+	1+	1+	NA	0	13/07/2015	3	NA	Yes	52	Not ambiguous	Not ambiguous	739	Neg	FALSE	H	Fixed	FALSE	1	1	1	1	1	1	1	1	Pos	Pos	Pos	Pos	Pos
H063	CDTC BDD NORD	No	Neg	NA	Neg	Neg	NA	Pos	Pos	Neg	Neg	0	0	0	0	Neg	Neg	0	0	0	0	NA	0	15/07/2015	NA	NA	Yes	32	Not ambiguous	Not ambiguous	745	Neg	FALSE	H	Fixed	FALSE	0	0	0	0	0	0	0	0	Neg	Neg	Neg	Neg	Neg
H064	CDTC BDD NORD	No	Neg	NA	Neg	Neg	NA	Neg	Neg	Pos	Pos	1+	1+	0	0	Neg	Neg	0	0	0	0	NA	0	15/07/2015	3	NA	Yes	51	Not ambiguous	Not ambiguous	747	Neg	FALSE	H	Fixed	FALSE	1	1	0	0	0	0	0	0	Pos	Pos	Neg	Neg	Neg
H065	CDTC BDD NORD	No	Neg	NA	Neg	Neg	NA	Neg	Neg	Neg	Neg	0	0	0	0	Pos	Pos	0	0	1+	1+	NA	0	15/07/2015	NA	NA	Yes	34	Not ambiguous	Not ambiguous	749	Neg	FALSE	H	Fixed	FALSE	0	0	0	0	0	0	1	1	Neg	Neg	Neg	Neg	Neg
H066	CDTC BDD NORD	No	Neg	NA	Neg	Neg	NA	Pos	Pos	Pos	Pos	0	0	1+	1+	Neg	Neg	0	0	0	0	NA	0	15/07/2015	NA	NA	Yes	36	Not ambiguous	Not ambiguous	751	Neg	FALSE	H	Fixed	FALSE	0	0	1	1	0	0	0	0	Neg	Neg	Pos	Pos	Neg
H067	CDTC BDD NORD	No	Neg	NA	Neg	Neg	NA	Neg	Neg	Neg	Neg	0	0	0	0	Pos	Pos	0	0	1+	1+	NA	0	15/07/2015	NA	NA	Yes	19	Not ambiguous	Not ambiguous	753	Neg	FALSE	H	Fixed	FALSE	0	0	0	0	0	0	1	1	Neg	Neg	Neg	Neg	Neg
H068	CDTC BDD NORD	No	Neg	NA	Neg	Neg	NA	Neg	Neg	Pos	Pos	1+	1+	1+	1+	Neg	Neg	0	0	0	0	NA	0	16/07/2015	4	NA	Yes	5	Not ambiguous	Not ambiguous	755	Neg	FALSE	H	Fixed	FALSE	1	1	1	1	0	0	0	0	Pos	Pos	Pos	Pos	Neg
H060	CDTC BDD NORD	No	NA	Pos	NA	NA	Pos	Pos	Pos	Pos	Pos	1+	1+	1+	1+	Pos	Pos	1+	1+	1+	1+	NA	0	13/07/2015	32	264	Yes	37	Not ambiguous	Not ambiguous	757	Pos	TRUE	H	Fixed	FALSE	1	1	1	1	1	1	1	1	Pos	Pos	Pos	Pos	Pos
H069	CDTC BDD NORD	No	Neg	NA	Neg	Neg	NA	Neg	Neg	Neg	Neg	0	0	0	0	Pos	Pos	1+	1+	1+	1+	NA	0	16/07/2015	NA	NA	Yes	51	Not ambiguous	Not ambiguous	759	Neg	FALSE	H	Fixed	FALSE	0	0	0	0	1	1	1	1	Neg	Neg	Neg	Neg	Pos
H072	CDTC BDD NORD	No	Neg	NA	Neg	Neg	NA	Neg	Neg	Neg	Neg	0	0	0	0	Neg	Neg	0	0	0	0	NA	0	22/07/2015	NA	NA	Yes	19	Not ambiguous	Not ambiguous	761	Neg	FALSE	H	Fixed	FALSE	0	0	0	0	0	0	0	0	Neg	Neg	Neg	Neg	Neg
H073	CDTC BDD NORD	No	Neg	NA	Neg	Neg	NA	Neg	Neg	Neg	Neg	0	0	0	0	Neg	Neg	0	0	0	0	NA	0	22/07/2015	NA	NA	Yes	23	Not ambiguous	Not ambiguous	763	Neg	FALSE	H	Fixed	FALSE	0	0	0	0	0	0	0	0	Neg	Neg	Neg	Neg	Neg
E3878	IDIOFA	No	Neg	NA	Neg	Neg	NA	Pos	Neg	Pos	Pos	1+	1+	0	0	Neg	Neg	0	0	0	0	NA	0	25/06/2015	17	NA	Yes	36	Not ambiguous	Not ambiguous	765	Neg	FALSE	E	Mobile	FALSE	1	1	0	0	0	0	0	0	Pos	Pos	Neg	Neg	Neg
E3377	IDIOFA	No	Neg	NA	Neg	Neg	NA	Pos	Pos	Neg	Neg	0	0	0	0	Pos	Pos	1+	1+	0	0	NA	0	22/06/2015	NA	NA	Yes	50	Not ambiguous	Not ambiguous	768	Neg	FALSE	E	Mobile	FALSE	0	0	0	0	1	1	0	0	Neg	Neg	Neg	Neg	Pos
E3394	IDIOFA	No	Neg	NA	Neg	Neg	NA	Pos	Pos	Neg	Neg	0	0	0	0	Neg	Neg	0	0	0	0	NA	0	24/06/2015	NA	NA	Yes	45	Not ambiguous	Not ambiguous	771	Neg	FALSE	E	Mobile	FALSE	0	0	0	0	0	0	0	0	Neg	Neg	Neg	Neg	Neg
E3404	IDIOFA	No	Neg	NA	Neg	Neg	NA	Pos	Pos	Neg	Neg	0	0	0	0	Neg	Neg	0	0	0	0	NA	0	24/06/2015	NA	NA	Yes	50	Not ambiguous	Not ambiguous	773	Neg	FALSE	E	Mobile	FALSE	0	0	0	0	0	0	0	0	Neg	Neg	Neg	Neg	Neg
E4070	IDIOFA	No	Neg	NA	Neg	Neg	NA	Pos	Pos	Neg	Neg	0	0	0	0	Neg	Neg	0	0	0	0	NA	0	26/06/2015	NA	NA	Yes	14	Not ambiguous	Not ambiguous	776	Neg	FALSE	E	Mobile	FALSE	0	0	0	0	0	0	0	0	Neg	Neg	Neg	Neg	Neg
E4135	IDIOFA	No	Neg	NA	Neg	Neg	NA	Neg	Neg	Pos	Pos	1+	1+	0	0	Pos	Pos	2+	2+	0	0	NA	0	25/06/2015	14	NA	Yes	62	Not ambiguous	Not ambiguous	778	Neg	FALSE	E	Mobile	FALSE	1	1	0	0	1	1	0	0	Pos	Pos	Neg	Neg	Pos
E4091	IDIOFA	No	Neg	NA	Neg	Neg	NA	Pos	Pos	Neg	Neg	0	0	0	0	Neg	Neg	0	0	0	0	NA	0	25/06/2015	NA	NA	Yes	34	Not ambiguous	Not ambiguous	780	Neg	FALSE	E	Mobile	FALSE	0	0	0	0	0	0	0	0	Neg	Neg	Neg	Neg	Neg
E3695	IDIOFA	No	Neg	NA	Neg	Neg	NA	Pos	Pos	Neg	Neg	0	0	0	0	Neg	Neg	0	0	0	0	NA	0	25/06/2015	NA	NA	Yes	22	Not ambiguous	Not ambiguous	782	Neg	FALSE	E	Mobile	FALSE	0	0	0	0	0	0	0	0	Neg	Neg	Neg	Neg	Neg
E4102	IDIOFA	No	Neg	NA	Neg	Neg	NA	Pos	Pos	Neg	Neg	0	0	0	0	Pos	Pos	1+	1+	0	0	NA	0	25/06/2015	NA	NA	Yes	15	Not ambiguous	Not ambiguous	784	Neg	FALSE	E	Mobile	FALSE	0	0	0	0	1	1	0	0	Neg	Neg	Neg	Neg	Pos
E4012	IDIOFA	No	Neg	NA	Neg	Neg	NA	Pos	Pos	Neg	Neg	0	0	0	0	Neg	Neg	0	0	0	0	NA	0	25/06/2015	NA	NA	Yes	57	Not ambiguous	Not ambiguous	786	Neg	FALSE	E	Mobile	FALSE	0	0	0	0	0	0	0	0	Neg	Neg	Neg	Neg	Neg
E4192	IDIOFA	No	Neg	NA	Neg	Neg	NA	Pos	Pos	Pos	Pos	1+	1+	0	0	Neg	Neg	0	0	0	0	NA	0	25/06/2015	23	NA	Yes	68	Not ambiguous	Not ambiguous	789	Neg	FALSE	E	Mobile	FALSE	1	1	0	0	0	0	0	0	Pos	Pos	Neg	Neg	Neg
H071	CDTC BDD NORD	No	Neg	NA	Neg	Neg	NA	Pos	Pos	Neg	Neg	0	0	0	0	Neg	Neg	0	0	0	0	NA	0	22/07/2015	NA	NA	Yes	36	Not ambiguous	Not ambiguous	816	Neg	FALSE	H	Fixed	FALSE	0	0	0	0	0	0	0	0	Neg	Neg	Neg	Neg	Neg
H074	CDTC BDD NORD	No	Neg	NA	Neg	Neg	NA	Neg	Neg	Neg	Neg	0	0	0	0	Pos	Pos	1+	1+	1+	1+	NA	0	23/07/2015	NA	NA	Yes	34	Not ambiguous	Not ambiguous	818	Neg	FALSE	H	Fixed	FALSE	0	0	0	0	1	1	1	1	Neg	Neg	Neg	Neg	Pos
H075	CDTC BDD NORD	No	Neg	NA	Neg	Neg	NA	Neg	Neg	Neg	Neg	0	0	0	0	Pos	Pos	3+	3+	0	0	NA	0	23/07/2015	NA	NA	Yes	21	Not ambiguous	Not ambiguous	820	Neg	FALSE	H	Fixed	FALSE	0	0	0	0	1	1	0	0	Neg	Neg	Neg	Neg	Pos
H076	CDTC BDD NORD	No	Neg	NA	Neg	Neg	NA	Neg	Neg	Pos	Pos	3+	3+	3+	3+	Neg	Neg	0	0	0	0	NA	0	23/07/2015	NA	NA	Yes	34	Not ambiguous	Not ambiguous	822	Neg	FALSE	H	Fixed	FALSE	1	1	1	1	0	0	0	0	Pos	Pos	Pos	Pos	Neg
H077	CDTC BDD NORD	No	Neg	NA	Neg	Neg	NA	Neg	Neg	Pos	Pos	1+	1+	0	0	Neg	Neg	0	0	0	0	NA	0	23/07/2015	3	NA	Yes	27	Not ambiguous	Not ambiguous	824	Neg	FALSE	H	Fixed	FALSE	1	1	0	0	0	0	0	0	Pos	Pos	Neg	Neg	Neg
H078	CDTC BDD NORD	No	Neg	NA	Neg	Neg	NA	Neg	Neg	Neg	Neg	0	0	0	0	Neg	Neg	0	0	0	0	NA	0	23/07/2015	NA	NA	Yes	29	Not ambiguous	Not ambiguous	826	Neg	FALSE	H	Fixed	FALSE	0	0	0	0	0	0	0	0	Neg	Neg	Neg	Neg	Neg
H079	CDTC BDD NORD	No	Neg	NA	Neg	Neg	NA	Pos	Pos	Pos	Pos	1+	1+	0	0	Pos	Pos	0	0	1+	1+	NA	0	24/07/2015	45	NA	Yes	53	Not ambiguous	Not ambiguous	828	Neg	FALSE	H	Fixed	FALSE	1	1	0	0	0	0	1	1	Pos	Pos	Neg	Neg	Neg
H080	CDTC BDD NORD	No	Neg	NA	Neg	Neg	NA	Pos	Pos	Neg	Neg	0	0	0	0	Neg	Neg	0	0	0	0	NA	0	27/07/2015	NA	NA	Yes	28	Not ambiguous	Not ambiguous	830	Neg	FALSE	H	Fixed	FALSE	0	0	0	0	0	0	0	0	Neg	Neg	Neg	Neg	Neg
H081	CDTC BDD NORD	No	Neg	NA	Neg	Neg	NA	Neg	Neg	Pos	Pos	1+	3+	1+	2+	Neg	Neg	0	0	0	0	NA	0	27/07/2015	29	NA	Yes	5	Not ambiguous	Not ambiguous	832	Neg	FALSE	H	Fixed	FALSE	1	1	1	1	0	0	0	0	Pos	Pos	Pos	Pos	Neg
H082	CDTC BDD NORD	No	Neg	NA	Neg	Neg	NA	Neg	Neg	Neg	Neg	0	0	0	0	Neg	Neg	0	0	0	0	NA	0	27/07/2015	NA	NA	Yes	47	Not ambiguous	Not ambiguous	834	Neg	FALSE	H	Fixed	FALSE	0	0	0	0	0	0	0	0	Neg	Neg	Neg	Neg	Neg
H017	CDTC BDD NORD	No	Neg	NA	Neg	Neg	NA	Neg	Neg	Neg	Neg	0	0	0	0	Pos	Pos	1+	1+	1+	1+	NA	0	19/06/2015	NA	NA	Yes	44	Not ambiguous	Not ambiguous	845	Neg	FALSE	H	Fixed	FALSE	0	0	0	0	1	1	1	1	Neg	Neg	Neg	Neg	Pos
H014	CDTC BDD NORD	No	Neg	NA	Neg	Neg	NA	Neg	Neg	Pos	Pos	1+	1+	1+	1+	Neg	Neg	0	0	0	0	NA	0	19/06/2015	5	NA	Yes	42	Not ambiguous	Not ambiguous	848	Neg	FALSE	H	Fixed	FALSE	1	1	1	1	0	0	0	0	Pos	Pos	Pos	Pos	Neg
H015	CDTC BDD NORD	No	Neg	NA	Neg	Neg	NA	Neg	Neg	Pos	Pos	1+	1+	0	1+	Neg	Neg	0	0	0	0	NA	0	19/06/2015	3	NA	Yes	24	Not ambiguous	Not ambiguous	850	Neg	FALSE	H	Fixed	FALSE	1	1	0	1	0	0	0	0	Pos	Pos	Neg	Pos	Neg
H013	CDTC BDD NORD	No	Neg	NA	Neg	Neg	NA	Pos	Pos	Neg	Neg	0	0	0	0	Neg	Neg	0	0	0	0	NA	0	19/06/2015	NA	NA	Yes	37	Not ambiguous	Not ambiguous	852	Neg	FALSE	H	Fixed	FALSE	0	0	0	0	0	0	0	0	Neg	Neg	Neg	Neg	Neg
H011	CDTC BDD NORD	No	Neg	NA	Neg	Neg	NA	Neg	Neg	Neg	Neg	0	0	0	0	Pos	Pos	1+	1+	0	0	NA	0	18/06/2015	NA	NA	Yes	30	Not ambiguous	Not ambiguous	854	Neg	FALSE	H	Fixed	FALSE	0	0	0	0	1	1	0	0	Neg	Neg	Neg	Neg	Pos
H012	CDTC BDD NORD	No	Neg	NA	Neg	Neg	NA	Pos	Pos	Neg	Neg	0	0	0	0	Neg	Neg	0	0	0	0	NA	0	18/06/2015	NA	NA	Yes	10	Not ambiguous	Not ambiguous	856	Neg	FALSE	H	Fixed	FALSE	0	0	0	0	0	0	0	0	Neg	Neg	Neg	Neg	Neg
H010	CDTC BDD NORD	No	Neg	NA	Neg	Neg	NA	Neg	Neg	Neg	Neg	0	0	0	0	Pos	Pos	1+	1+	1+	1+	NA	0	17/06/2015	NA	NA	Yes	3	Not ambiguous	Not ambiguous	858	Neg	FALSE	H	Fixed	FALSE	0	0	0	0	1	1	1	1	Neg	Neg	Neg	Neg	Pos
H008	CDTC BDD NORD	No	Neg	NA	Neg	Neg	NA	Pos	Pos	Neg	Neg	0	0	0	0	Neg	Neg	0	0	0	0	NA	0	16/06/2015	NA	NA	Yes	35	Not ambiguous	Not ambiguous	860	Neg	FALSE	H	Fixed	FALSE	0	0	0	0	0	0	0	0	Neg	Neg	Neg	Neg	Neg
H007	CDTC BDD NORD	No	Neg	NA	Neg	Neg	NA	Neg	Neg	Pos	Pos	1+	1+	0	0	Neg	Neg	0	0	0	0	NA	0	16/06/2015	4	NA	Yes	20	Not ambiguous	Not ambiguous	862	Neg	FALSE	H	Fixed	FALSE	1	1	0	0	0	0	0	0	Pos	Pos	Neg	Neg	Neg
H006	CDTC BDD NORD	No	Neg	NA	Neg	Neg	NA	Neg	Neg	Neg	Neg	0	0	0	0	Pos	Pos	1+	1+	0	0	NA	0	16/06/2015	NA	NA	Yes	27	Not ambiguous	Not ambiguous	864	Neg	FALSE	H	Fixed	FALSE	0	0	0	0	1	1	0	0	Neg	Neg	Neg	Neg	Pos
H005	CDTC BDD/NORD	No	Neg	NA	Neg	Neg	NA	Neg	Neg	Neg	Neg	0	0	0	0	Pos	Pos	0	0	1+	1+	NA	0	16/06/2015	NA	NA	Yes	13	Not ambiguous	Not ambiguous	866	Neg	FALSE	H	Fixed	FALSE	0	0	0	0	0	0	1	1	Neg	Neg	Neg	Neg	Neg
H004	CDTC BDD NORD	No	Neg	NA	Neg	Neg	NA	Neg	Neg	Neg	Neg	0	0	0	0	Pos	Pos	1+	1+	3+	0	NA	0	16/06/2015	1	NA	Yes	16	Not ambiguous	Not ambiguous	868	Neg	FALSE	H	Fixed	FALSE	0	0	0	0	1	1	1	0	Neg	Neg	Neg	Neg	Pos
H002	CDTC BANDUNDU NORD	No	Neg	NA	Neg	Neg	NA	Neg	Neg	Pos	Pos	1+	1+	0	0	Neg	Neg	0	0	0	0	NA	0	15/06/2015	5	NA	Yes	32	Not ambiguous	Not ambiguous	870	Neg	FALSE	H	Fixed	FALSE	1	1	0	0	0	0	0	0	Pos	Pos	Neg	Neg	Neg
H003	CDTC BANDUNDU/NORD	No	Neg	NA	Neg	Neg	NA	Neg	Neg	Neg	Neg	0	0	0	0	Pos	Pos	0	0	1+	1+	NA	0	15/06/2015	NA	NA	Yes	0	Not ambiguous	Not ambiguous	872	Neg	FALSE	H	Fixed	FALSE	0	0	0	0	0	0	1	1	Neg	Neg	Neg	Neg	Neg
H001	CDTC BDD NORD	No	Neg	NA	Neg	Neg	NA	Neg	Neg	Neg	Neg	0	0	0	0	Pos	Pos	1+	1+	0	0	NA	0	15/06/2015	NA	NA	Yes	0	Not ambiguous	Not ambiguous	874	Neg	FALSE	H	Fixed	FALSE	0	0	0	0	1	1	0	0	Neg	Neg	Neg	Neg	Pos
H083	CDTC BDD NORD	No	Neg	NA	Neg	Neg	NA	Neg	Neg	Neg	Neg	0	0	0	0	Pos	Pos	0	0	3+	3+	NA	0	28/07/2015	NA	NA	Yes	7	Not ambiguous	Not ambiguous	876	Neg	FALSE	H	Fixed	FALSE	0	0	0	0	0	0	1	1	Neg	Neg	Neg	Neg	Neg
H084	CDTC BDD NORD	No	Neg	NA	Neg	Neg	NA	Neg	Neg	Pos	Pos	1+	1+	0	0	Neg	Neg	0	0	0	0	NA	0	28/07/2015	3	NA	Yes	12	Not ambiguous	Not ambiguous	878	Neg	FALSE	H	Fixed	FALSE	1	1	0	0	0	0	0	0	Pos	Pos	Neg	Neg	Neg
H085	CDTC BDD NORD	No	Neg	NA	Neg	Neg	NA	Neg	Neg	Neg	Neg	0	0	0	0	Neg	Neg	0	0	0	0	NA	0	28/07/2015	NA	NA	Yes	47	Not ambiguous	Not ambiguous	880	Neg	FALSE	H	Fixed	FALSE	0	0	0	0	0	0	0	0	Neg	Neg	Neg	Neg	Neg
H086	CDTC BDD NORD	No	Neg	NA	Neg	Neg	NA	Neg	Neg	Neg	Neg	0	0	0	0	Pos	Pos	0	0	3+	3+	NA	0	29/07/2015	NA	NA	Yes	16	Not ambiguous	Not ambiguous	882	Neg	FALSE	H	Fixed	FALSE	0	0	0	0	0	0	1	1	Neg	Neg	Neg	Neg	Neg
H087	CDTC BDD NORD	No	Neg	NA	Neg	Neg	NA	Neg	Neg	Pos	Pos	3+	3+	2+	2+	Pos	Pos	0	0	2+	2+	NA	0	29/07/2015	NA	NA	Yes	17	Not ambiguous	Not ambiguous	884	Neg	FALSE	H	Fixed	FALSE	1	1	1	1	0	0	1	1	Pos	Pos	Pos	Pos	Neg
H088	CDTC BDD NORD	No	Neg	NA	Neg	Neg	NA	Neg	Neg	Neg	Neg	0	0	0	0	Pos	Pos	2+	2+	0	0	NA	0	30/07/2015	NA	NA	Yes	3	Not ambiguous	Not ambiguous	887	Neg	FALSE	H	Fixed	FALSE	0	0	0	0	1	1	0	0	Neg	Neg	Neg	Neg	Pos
H089	CDTC BDD NORD	No	Neg	NA	Neg	Neg	Neg	Neg	Neg	Neg	Neg	0	0	0	0	Neg	Neg	0	0	0	0	NA	0	31/07/2015	NA	NA	Yes	19	Not ambiguous	Not ambiguous	890	Neg	FALSE	H	Fixed	FALSE	0	0	0	0	0	0	0	0	Neg	Neg	Neg	Neg	Neg
H090	CDTC BDD NORD	No	Neg	NA	Neg	Neg	Neg	Pos	Pos	Pos	Pos	0	2+	2+	0	Pos	Pos	3+	3+	1+	1+	NA	0	31/07/2015	NA	NA	Yes	17	Not ambiguous	Not ambiguous	892	Neg	FALSE	H	Fixed	FALSE	0	1	1	0	1	1	1	1	Neg	Pos	Pos	Neg	Pos
H091	CDTC BDD NORD	No	Neg	NA	Neg	Neg	NA	Neg	Neg	Pos	Pos	0	0	3+	3+	Neg	Neg	0	0	0	0	NA	0	31/07/2015	NA	NA	Yes	46	Not ambiguous	Not ambiguous	895	Neg	FALSE	H	Fixed	FALSE	0	0	1	1	0	0	0	0	Neg	Neg	Pos	Pos	Neg
H093	CDTC BDD NORD	No	Neg	NA	Neg	Neg	NA	Pos	Pos	Neg	Neg	0	0	0	0	Pos	Pos	2+	2+	0	0	NA	0	03/08/2015	NA	NA	Yes	11	Not ambiguous	Not ambiguous	901	Neg	FALSE	H	Fixed	FALSE	0	0	0	0	1	1	0	0	Neg	Neg	Neg	Neg	Pos
H094	CDTC BDD NORD	No	Neg	NA	Neg	Neg	NA	Neg	Neg	Neg	Neg	0	0	0	0	Neg	Neg	0	0	0	0	NA	0	03/08/2015	NA	NA	Yes	27	Not ambiguous	Not ambiguous	904	Neg	FALSE	H	Fixed	FALSE	0	0	0	0	0	0	0	0	Neg	Neg	Neg	Neg	Neg
H095	CDTC BDD NORD	No	Neg	NA	Neg	Neg	NA	Pos	Pos	Neg	Neg	0	0	0	0	Neg	Neg	0	0	0	0	NA	0	04/08/2015	NA	NA	Yes	6	Not ambiguous	Not ambiguous	907	Neg	FALSE	H	Fixed	FALSE	0	0	0	0	0	0	0	0	Neg	Neg	Neg	Neg	Neg
H096	CDTC BDD NORD	No	Neg	NA	Neg	Neg	Neg	Neg	Neg	Neg	Neg	0	0	0	0	Pos	Pos	2+	2+	0	0	NA	0	04/08/2015	NA	NA	Yes	24	Not ambiguous	Not ambiguous	909	Neg	FALSE	H	Fixed	FALSE	0	0	0	0	1	1	0	0	Neg	Neg	Neg	Neg	Pos
H047	CDTC BDD NORD	No	Neg	NA	Neg	Neg	Neg	Neg	Neg	Pos	Pos	1+	1+	1+	1+	Neg	Neg	0	0	0	0	NA	0	04/07/2015	2	NA	Yes	0	Not ambiguous	Not ambiguous	934	Neg	FALSE	H	Fixed	FALSE	1	1	1	1	0	0	0	0	Pos	Pos	Pos	Pos	Neg
H046	CDTC BDD NORD	No	Neg	NA	Neg	Neg	Neg	Neg	Neg	Pos	Pos	1+	1+	1+	1+	Pos	Pos	1+	1+	0	0	NA	0	03/07/2015	4	NA	Yes	22	Not ambiguous	Not ambiguous	936	Neg	FALSE	H	Fixed	FALSE	1	1	1	1	1	1	0	0	Pos	Pos	Pos	Pos	Pos
H045	CDTC BDD NORD	No	Neg	NA	Neg	Neg	Neg	Neg	Neg	Neg	Neg	0	0	0	0	Pos	Pos	0	0	1+	1+	NA	0	03/07/2015	NA	NA	Yes	32	Not ambiguous	Not ambiguous	938	Neg	FALSE	H	Fixed	FALSE	0	0	0	0	0	0	1	1	Neg	Neg	Neg	Neg	Neg
H044	CDTC BDD NORD	No	Neg	NA	Neg	Neg	NA	Neg	Neg	Pos	Pos	0	0	1+	1+	Pos	Pos	0	0	1+	1+	NA	0	02/07/2015	NA	NA	Yes	0	Not ambiguous	Not ambiguous	940	Neg	FALSE	H	Fixed	FALSE	0	0	1	1	0	0	1	1	Neg	Neg	Pos	Pos	Neg
H043	CDTC BDD NORD	No	Neg	NA	Neg	Neg	NA	Neg	Neg	Neg	Neg	0	0	0	0	Pos	Pos	0	0	1+	1+	NA	0	02/07/2015	NA	NA	Yes	46	Not ambiguous	Not ambiguous	942	Neg	FALSE	H	Fixed	FALSE	0	0	0	0	0	0	1	1	Neg	Neg	Neg	Neg	Neg
H042	CDTC BDD NORD	No	Neg	NA	Neg	Neg	NA	Neg	Neg	Neg	Neg	0	0	0	0	Pos	Pos	2+	3+	2+	3+	NA	0	01/07/2015	NA	NA	Yes	39	Not ambiguous	Not ambiguous	944	Neg	FALSE	H	Fixed	FALSE	0	0	0	0	1	1	1	1	Neg	Neg	Neg	Neg	Pos
H040	CDTC BDD NORD	No	Neg	NA	Neg	Neg	NA	Pos	Pos	Neg	Neg	0	0	0	0	Pos	Pos	2+	2+	2+	2+	NA	0	29/06/2015	NA	NA	Yes	0	Not ambiguous	Not ambiguous	946	Neg	FALSE	H	Fixed	FALSE	0	0	0	0	1	1	1	1	Neg	Neg	Neg	Neg	Pos
H041	CDTC BDD NORD	No	Neg	NA	Neg	Neg	NA	Neg	Neg	Neg	Neg	0	0	0	0	Pos	Pos	0	0	1+	1+	NA	0	01/07/2015	NA	NA	Yes	18	Not ambiguous	Not ambiguous	948	Neg	FALSE	H	Fixed	FALSE	0	0	0	0	0	0	1	1	Neg	Neg	Neg	Neg	Neg
H039	CDTC BDD NORD	No	Neg	NA	Neg	Neg	NA	Neg	Neg	Neg	Neg	0	0	0	0	Pos	Pos	1+	1+	0	0	NA	0	29/06/2015	NA	NA	Yes	44	Not ambiguous	Not ambiguous	950	Neg	FALSE	H	Fixed	FALSE	0	0	0	0	1	1	0	0	Neg	Neg	Neg	Neg	Pos
H038	CDTC BDD NORD	No	Neg	NA	Neg	Neg	NA	Pos	Pos	Neg	Neg	0	0	0	0	Neg	Neg	0	0	0	0	NA	0	29/06/2015	NA	NA	Yes	7	Not ambiguous	Not ambiguous	952	Neg	FALSE	H	Fixed	FALSE	0	0	0	0	0	0	0	0	Neg	Neg	Neg	Neg	Neg
H037	CDTC BDD NORD	No	Neg	NA	Neg	Neg	NA	Pos	Pos	Neg	Neg	0	0	0	0	Neg	Neg	0	0	0	0	NA	0	29/06/2015	NA	NA	Yes	17	Not ambiguous	Not ambiguous	954	Neg	FALSE	H	Fixed	FALSE	0	0	0	0	0	0	0	0	Neg	Neg	Neg	Neg	Neg
H036	CDTC BDD NORD	No	Neg	NA	Neg	Neg	NA	Pos	Pos	Neg	Neg	0	0	0	0	Neg	Neg	0	0	0	0	NA	0	29/06/2015	NA	NA	Yes	0	Not ambiguous	Not ambiguous	956	Neg	FALSE	H	Fixed	FALSE	0	0	0	0	0	0	0	0	Neg	Neg	Neg	Neg	Neg
H035	CDTC BDD NORD	No	Neg	NA	Neg	Neg	NA	Neg	Neg	Neg	Neg	0	0	0	0	Pos	Pos	0	0	1+	1+	NA	0	27/06/2015	NA	NA	Yes	58	Not ambiguous	Not ambiguous	958	Neg	FALSE	H	Fixed	FALSE	0	0	0	0	0	0	1	1	Neg	Neg	Neg	Neg	Neg
H034	CDTC BDD NORD	No	Neg	NA	Neg	Neg	NA	Neg	Neg	Neg	Neg	0	0	0	0	Pos	Pos	1+	1+	1+	1+	NA	0	27/06/2015	NA	NA	Yes	62	Not ambiguous	Not ambiguous	960	Neg	FALSE	H	Fixed	FALSE	0	0	0	0	1	1	1	1	Neg	Neg	Neg	Neg	Pos
H032	CDTC BDD NORD	No	Neg	NA	Neg	Neg	NA	Neg	Neg	Neg	Neg	0	0	0	0	Pos	Pos	1+	1+	1+	1+	NA	0	26/06/2015	NA	NA	Yes	0	Not ambiguous	Not ambiguous	964	Neg	FALSE	H	Fixed	FALSE	0	0	0	0	1	1	1	1	Neg	Neg	Neg	Neg	Pos
H030	CDTC BDD NORD	No	Neg	NA	Neg	Neg	NA	Neg	Neg	Neg	Neg	0	0	0	0	Pos	Pos	1+	1+	0	0	NA	0	24/06/2015	NA	NA	Yes	26	Not ambiguous	Not ambiguous	966	Neg	FALSE	H	Fixed	FALSE	0	0	0	0	1	1	0	0	Neg	Neg	Neg	Neg	Pos
H031	CDTC BDD NORD	No	Neg	NA	Neg	Neg	NA	Pos	Neg	Neg	Neg	0	0	0	0	Pos	Pos	1+	1+	1+	1+	NA	0	26/06/2015	NA	NA	Yes	31	Not ambiguous	Not ambiguous	968	Neg	FALSE	H	Fixed	FALSE	0	0	0	0	1	1	1	1	Neg	Neg	Neg	Neg	Pos
H029	CDTC BDD NORD	No	Neg	NA	Neg	Neg	NA	Neg	Neg	Neg	Neg	0	0	0	0	Pos	Pos	1+	1+	0	0	NA	0	24/06/2015	NA	NA	Yes	23	Not ambiguous	Not ambiguous	970	Neg	FALSE	H	Fixed	FALSE	0	0	0	0	1	1	0	0	Neg	Neg	Neg	Neg	Pos
H028	CDTC BDD NORD	No	Neg	NA	Neg	Neg	NA	Pos	Pos	Pos	Pos	1+	1+	1+	1+	Pos	Pos	1+	1+	1+	1+	NA	0	24/06/2015	3	NA	Yes	0	Not ambiguous	Not ambiguous	972	Neg	FALSE	H	Fixed	FALSE	1	1	1	1	1	1	1	1	Pos	Pos	Pos	Pos	Pos
H027	CDTC BDD NORD	No	Neg	NA	Neg	Neg	NA	Neg	Neg	Neg	Neg	0	0	0	0	Pos	Pos	1+	1+	1+	1+	NA	0	24/06/2015	NA	NA	Yes	48	Not ambiguous	Not ambiguous	974	Neg	FALSE	H	Fixed	FALSE	0	0	0	0	1	1	1	1	Neg	Neg	Neg	Neg	Pos
H026	CDTC BDD NORD	No	Neg	NA	Neg	Neg	NA	Neg	Neg	Neg	Neg	0	0	0	0	Pos	Pos	1+	1+	1+	1+	NA	0	23/06/2015	NA	NA	Yes	6	Not ambiguous	Not ambiguous	976	Neg	FALSE	H	Fixed	FALSE	0	0	0	0	1	1	1	1	Neg	Neg	Neg	Neg	Pos
H024	CDTC BDD NORD	No	Neg	NA	Neg	Neg	NA	Neg	Neg	Pos	Pos	1+	1+	1+	1+	Neg	Neg	0	0	0	0	NA	0	22/06/2015	11	NA	Yes	14	Not ambiguous	Not ambiguous	978	Neg	FALSE	H	Fixed	FALSE	1	1	1	1	0	0	0	0	Pos	Pos	Pos	Pos	Neg
H025	CDTC BDD NORD	No	Neg	NA	Neg	Neg	NA	Pos	Neg	Neg	Neg	0	0	0	0	Neg	Neg	0	0	0	0	NA	0	22/06/2015	NA	NA	Yes	0	Not ambiguous	Not ambiguous	980	Neg	FALSE	H	Fixed	FALSE	0	0	0	0	0	0	0	0	Neg	Neg	Neg	Neg	Neg
H023	CDTC BDD NORD	No	Neg	NA	Neg	Neg	NA	Neg	Neg	Pos	Pos	1+	1+	1+	1+	Neg	Neg	0	0	0	0	NA	0	22/06/2015	11	NA	Yes	10	Not ambiguous	Not ambiguous	982	Neg	FALSE	H	Fixed	FALSE	1	1	1	1	0	0	0	0	Pos	Pos	Pos	Pos	Neg
H022	CDTC BDD NORD	No	Neg	NA	Neg	Neg	NA	Pos	Pos	Neg	Neg	0	0	0	0	Neg	Neg	0	0	0	0	NA	0	22/06/2015	NA	NA	Yes	20	Not ambiguous	Not ambiguous	984	Neg	FALSE	H	Fixed	FALSE	0	0	0	0	0	0	0	0	Neg	Neg	Neg	Neg	Neg
H021	CDTC BDD NORD	No	Neg	NA	Neg	Neg	NA	Neg	Neg	Neg	Neg	0	0	0	0	Pos	Pos	0	0	1+	1+	NA	0	22/06/2015	NA	NA	Yes	0	Not ambiguous	Not ambiguous	986	Neg	FALSE	H	Fixed	FALSE	0	0	0	0	0	0	1	1	Neg	Neg	Neg	Neg	Neg
H020	CDTC BDD NORD	No	Neg	NA	Neg	Neg	NA	Neg	Neg	Pos	Pos	1+	1+	1+	1+	Neg	Neg	0	0	0	0	NA	0	22/06/2015	29	NA	Yes	27	Not ambiguous	Not ambiguous	988	Neg	FALSE	H	Fixed	FALSE	1	1	1	1	0	0	0	0	Pos	Pos	Pos	Pos	Neg
H019	CDTC/BDD NORD	No	Neg	NA	Neg	Neg	NA	Pos	Pos	Neg	Neg	0	0	0	0	Pos	Pos	1+	1+	0	0	NA	0	20/06/2015	NA	NA	Yes	27	Not ambiguous	Not ambiguous	990	Neg	FALSE	H	Fixed	FALSE	0	0	0	0	1	1	0	0	Neg	Neg	Neg	Neg	Pos
H018	CDTC BDD NORD	No	Neg	NA	Neg	Neg	NA	Neg	Neg	Pos	Pos	1+	1+	1+	1+	Neg	Neg	0	0	0	0	NA	0	20/06/2015	4	NA	Yes	30	Not ambiguous	Not ambiguous	992	Neg	FALSE	H	Fixed	FALSE	1	1	1	1	0	0	0	0	Pos	Pos	Pos	Pos	Neg
H048	CDTC BDD NORD	No	Neg	NA	Neg	Neg	NA	Neg	Neg	Pos	Pos	1+	1+	1+	1+	Pos	Pos	1+	1+	0	0	NA	0	04/07/2015	11	NA	Yes	20	Not ambiguous	Not ambiguous	1024	Neg	FALSE	H	Fixed	FALSE	1	1	1	1	1	1	0	0	Pos	Pos	Pos	Pos	Pos
H049	CDTC BDD NORD	No	Neg	NA	Neg	Neg	NA	Neg	Neg	Neg	Neg	0	0	0	0	Pos	Pos	0	0	1+	1+	NA	0	06/07/2015	NA	NA	Yes	16	Not ambiguous	Not ambiguous	1026	Neg	FALSE	H	Fixed	FALSE	0	0	0	0	0	0	1	1	Neg	Neg	Neg	Neg	Neg
H050	CDTC BDD NORD	No	Neg	NA	Neg	Neg	NA	Neg	Neg	Pos	Pos	1+	1+	0	0	Neg	Neg	0	0	0	0	NA	0	06/07/2015	5	NA	Yes	30	Not ambiguous	Not ambiguous	1028	Neg	FALSE	H	Fixed	FALSE	1	1	0	0	0	0	0	0	Pos	Pos	Neg	Neg	Neg
H051	CDTC BDD NORD	No	Neg	NA	Neg	Neg	NA	Neg	Neg	Pos	Pos	2+	2+	2+	2+	Pos	Pos	1+	1+	3+	3+	NA	0	06/07/2015	NA	NA	Yes	18	Not ambiguous	Not ambiguous	1030	Neg	FALSE	H	Fixed	FALSE	1	1	1	1	1	1	1	1	Pos	Pos	Pos	Pos	Pos
H052	CDTC BDD NORD	No	Neg	NA	Neg	Neg	NA	Neg	Neg	Neg	Neg	0	0	0	0	Pos	Pos	0	0	1+	1+	NA	0	07/07/2015	NA	NA	Yes	60	Not ambiguous	Not ambiguous	1032	Neg	FALSE	H	Fixed	FALSE	0	0	0	0	0	0	1	1	Neg	Neg	Neg	Neg	Neg
G927	HGR/BDD	No	Neg	NA	Neg	Neg	NA	Neg	Neg	Neg	Neg	0	0	0	0	Pos	Pos	4+	4+	1+	1+	NA	0	03/08/2015	NA	NA	Yes	37	Not ambiguous	Not ambiguous	1037	Neg	FALSE	G	Fixed	FALSE	0	0	0	0	1	1	1	1	Neg	Neg	Neg	Neg	Pos
G925	HGR/BDD	No	Neg	NA	Neg	Neg	NA	Pos	Pos	Pos	Pos	0	0	4+	4+	Neg	Neg	0	0	0	0	NA	0	03/08/2015	NA	NA	Yes	40	Not ambiguous	Not ambiguous	1039	Neg	FALSE	G	Fixed	FALSE	0	0	1	1	0	0	0	0	Neg	Neg	Pos	Pos	Neg
G914	HGR/BDD	No	Neg	NA	Neg	Neg	NA	Neg	Neg	Neg	Neg	0	0	0	0	Pos	Pos	0	0	4+	2+	NA	0	03/08/2015	NA	NA	Yes	25	Not ambiguous	Not ambiguous	1041	Neg	FALSE	G	Fixed	FALSE	0	0	0	0	0	0	1	1	Neg	Neg	Neg	Neg	Neg
G913	HGR/BDD	No	Neg	NA	Neg	Neg	NA	Neg	Neg	Neg	Neg	0	0	0	0	Pos	Pos	2+	2+	0	0	NA	0	04/08/2015	NA	NA	Yes	3	Not ambiguous	Not ambiguous	1044	Neg	FALSE	G	Fixed	FALSE	0	0	0	0	1	1	0	0	Neg	Neg	Neg	Neg	Pos
G909	HGR/BDD	No	Neg	NA	Neg	Neg	NA	Pos	Pos	Neg	Neg	0	0	0	0	Neg	Neg	0	0	0	0	NA	0	03/08/2015	NA	NA	Yes	42	Not ambiguous	Not ambiguous	1049	Neg	FALSE	G	Fixed	FALSE	0	0	0	0	0	0	0	0	Neg	Neg	Neg	Neg	Neg
G900	HGR/BDD	No	Neg	NA	Neg	Neg	NA	Neg	Neg	Pos	Pos	0	0	2+	2+	Neg	Neg	0	0	0	0	NA	0	31/07/2015	NA	NA	Yes	38	Not ambiguous	Not ambiguous	1052	Neg	FALSE	G	Fixed	FALSE	0	0	1	1	0	0	0	0	Neg	Neg	Pos	Pos	Neg
G893	HGR/BDD	No	Neg	NA	Neg	Neg	NA	Pos	Pos	Pos	Pos	4+	4+	0	0	Pos	Pos	0	0	2+	2+	NA	0	31/07/2015	NA	NA	Yes	15	Not ambiguous	Not ambiguous	1054	Neg	FALSE	G	Fixed	FALSE	1	1	0	0	0	0	1	1	Pos	Pos	Neg	Neg	Neg
G890	HGR/BDD	No	Neg	NA	Neg	Neg	NA	Neg	Neg	Neg	Neg	0	0	0	0	Pos	Pos	3+	3+	1+	1+	NA	0	03/08/2015	NA	NA	Yes	12	Not ambiguous	Not ambiguous	1057	Neg	FALSE	G	Fixed	FALSE	0	0	0	0	1	1	1	1	Neg	Neg	Neg	Neg	Pos
G475	HGR/BDD	No	Neg	NA	Neg	Neg	NA	Neg	Neg	Pos	Pos	0	0	4+	4+	Neg	Neg	0	0	0	0	NA	0	01/07/2015	NA	NA	Yes	70	Not ambiguous	Not ambiguous	1059	Neg	FALSE	G	Fixed	FALSE	0	0	1	1	0	0	0	0	Neg	Neg	Pos	Pos	Neg
G479	HGR/BDD	No	Neg	NA	Neg	Neg	NA	Pos	Pos	Neg	Neg	0	0	0	0	Neg	Neg	0	0	0	0	NA	0	01/07/2015	NA	NA	Yes	22	Not ambiguous	Not ambiguous	1061	Neg	FALSE	G	Fixed	FALSE	0	0	0	0	0	0	0	0	Neg	Neg	Neg	Neg	Neg
G497	HGR/BDD	No	Neg	NA	Neg	Neg	NA	Neg	Neg	Pos	Pos	4+	4+	0	0	Pos	Pos	1+	1+	0	0	NA	0	02/07/2015	NA	NA	Yes	70	Not ambiguous	Not ambiguous	1063	Neg	FALSE	G	Fixed	FALSE	1	1	0	0	1	1	0	0	Pos	Pos	Neg	Neg	Pos
G513	HGR/BDD	No	Neg	NA	Neg	Neg	NA	Pos	Pos	Pos	Pos	4+	4+	0	0	Pos	Pos	0	4+	4+	0	NA	0	03/07/2015	NA	NA	Yes	15	Not ambiguous	Not ambiguous	1066	Neg	FALSE	G	Fixed	FALSE	1	1	0	0	0	1	1	0	Pos	Pos	Neg	Neg	Neg
G514	HGR/BDD	No	Neg	NA	Neg	Neg	NA	Neg	Neg	Neg	Neg	0	0	0	0	Pos	Pos	0	0	4+	4+	NA	0	03/07/2015	NA	NA	Yes	60	Not ambiguous	Not ambiguous	1069	Neg	FALSE	G	Fixed	FALSE	0	0	0	0	0	0	1	1	Neg	Neg	Neg	Neg	Neg
G516	HGR/BDD	No	Neg	NA	Neg	Neg	NA	Neg	Neg	Pos	Pos	0	4+	4+	0	Neg	Neg	0	0	0	0	NA	0	03/07/2015	NA	NA	Yes	40	Not ambiguous	Not ambiguous	1071	Neg	FALSE	G	Fixed	FALSE	0	1	1	0	0	0	0	0	Neg	Pos	Pos	Neg	Neg
G734	HGR/BDD	No	Neg	NA	Neg	Neg	NA	Neg	Neg	Neg	Neg	0	0	0	0	Pos	Pos	0	0	4+	3+	NA	0	20/07/2015	NA	NA	Yes	23	Not ambiguous	Not ambiguous	1074	Neg	FALSE	G	Fixed	FALSE	0	0	0	0	0	0	1	1	Neg	Neg	Neg	Neg	Neg
G719	HGR/BDD	No	Neg	NA	Neg	Neg	NA	Neg	Neg	Pos	Pos	0	0	2+	2+	Neg	Neg	0	0	0	0	NA	0	18/07/2015	NA	NA	Yes	4	Not ambiguous	Not ambiguous	1076	Neg	FALSE	G	Fixed	FALSE	0	0	1	1	0	0	0	0	Neg	Neg	Pos	Pos	Neg
G686	HGR/BDD	No	Neg	NA	Neg	Neg	NA	Neg	Neg	Pos	Pos	4+	4+	0	0	Neg	Neg	0	0	0	0	NA	0	13/07/2015	NA	NA	Yes	38	Not ambiguous	Not ambiguous	1079	Neg	FALSE	G	Fixed	FALSE	1	1	0	0	0	0	0	0	Pos	Pos	Neg	Neg	Neg
G670	HGR/BDD	No	Neg	NA	Neg	Neg	NA	Neg	Neg	Neg	Neg	0	0	0	0	Pos	Pos	3+	3+	0	0	NA	0	11/07/2015	NA	NA	Yes	65	Not ambiguous	Not ambiguous	1081	Neg	FALSE	G	Fixed	FALSE	0	0	0	0	1	1	0	0	Neg	Neg	Neg	Neg	Pos
G668	HGR/BDD	No	Neg	NA	Neg	Neg	NA	Neg	Neg	Pos	Pos	0	0	3+	3+	Pos	Pos	3+	3+	0	0	NA	0	11/07/2015	NA	NA	Yes	25	Not ambiguous	Not ambiguous	1084	Neg	FALSE	G	Fixed	FALSE	0	0	1	1	1	1	0	0	Neg	Neg	Pos	Pos	Pos
G665	HGR/BDD	No	Neg	NA	Neg	Neg	NA	Neg	Neg	Pos	Pos	1+	1+	0	0	Pos	Pos	0	0	2+	2+	NA	0	11/07/2015	99	NA	Yes	22	Not ambiguous	Not ambiguous	1086	Neg	FALSE	G	Fixed	FALSE	1	1	0	0	0	0	1	1	Pos	Pos	Neg	Neg	Neg
G659	HGR/BDD	No	Neg	NA	Neg	Neg	NA	Neg	Neg	Pos	Pos	1+	1+	0	0	Pos	Pos	0	0	2+	2+	NA	0	11/07/2015	99	NA	Yes	19	Not ambiguous	Not ambiguous	1093	Neg	FALSE	G	Fixed	FALSE	1	1	0	0	0	0	1	1	Pos	Pos	Neg	Neg	Neg
G607	HGR/BDD	No	Neg	NA	Neg	Neg	NA	Neg	Neg	Pos	Pos	4+	4+	0	0	Neg	Neg	0	0	0	0	NA	0	08/07/2015	NA	NA	Yes	30	Not ambiguous	Not ambiguous	1096	Neg	FALSE	G	Fixed	FALSE	1	1	0	0	0	0	0	0	Pos	Pos	Neg	Neg	Neg
G577	HGR/BDD	No	Neg	NA	Neg	Neg	NA	Neg	Neg	Pos	Pos	0	0	4+	4+	Neg	Neg	0	0	0	0	NA	0	07/07/2015	NA	NA	Yes	32	Not ambiguous	Not ambiguous	1098	Neg	FALSE	G	Fixed	FALSE	0	0	1	1	0	0	0	0	Neg	Neg	Pos	Pos	Neg
G572	HGR/BDD	No	Neg	NA	Neg	Neg	NA	Neg	Neg	Neg	Neg	0	0	0	0	Pos	Pos	0	0	4+	4+	NA	0	06/07/2015	NA	NA	Yes	33	Not ambiguous	Not ambiguous	1101	Neg	FALSE	G	Fixed	FALSE	0	0	0	0	0	0	1	1	Neg	Neg	Neg	Neg	Neg
G569	HGR/BDD	No	Neg	NA	Neg	Neg	NA	Neg	Neg	Pos	Pos	0	0	4+	4+	Neg	Neg	0	0	0	0	NA	0	06/07/2015	NA	NA	Yes	30	Not ambiguous	Not ambiguous	1103	Neg	FALSE	G	Fixed	FALSE	0	0	1	1	0	0	0	0	Neg	Neg	Pos	Pos	Neg
G519	HGR/BDD	No	Neg	NA	Neg	Neg	NA	Pos	Pos	Pos	Pos	4+	4+	0	0	Neg	Neg	0	0	0	0	NA	0	03/07/2015	NA	NA	Yes	11	Not ambiguous	Not ambiguous	1106	Neg	FALSE	G	Fixed	FALSE	1	1	0	0	0	0	0	0	Pos	Pos	Neg	Neg	Neg
G518	HGR/BDD	No	Neg	NA	Neg	Neg	NA	Pos	Pos	Pos	Pos	4+	4+	0	0	Neg	Neg	0	0	0	0	NA	0	03/07/2015	NA	NA	Yes	23	Not ambiguous	Not ambiguous	1108	Neg	FALSE	G	Fixed	FALSE	1	1	0	0	0	0	0	0	Pos	Pos	Neg	Neg	Neg
G002	HGR/BDD	No	Neg	NA	Neg	Neg	NA	Neg	Neg	Neg	Neg	0	0	0	0	Pos	Pos	0	0	3+	3+	NA	0	15/06/2015	NA	NA	Yes	55	Not ambiguous	Not ambiguous	1114	Neg	FALSE	G	Fixed	FALSE	0	0	0	0	0	0	1	1	Neg	Neg	Neg	Neg	Neg
G010	HGR/BDD	No	Neg	NA	Neg	Neg	NA	Neg	Neg	Neg	Neg	0	0	0	0	Pos	Pos	4+	3+	1+	1+	NA	0	15/06/2015	NA	NA	Yes	22	Not ambiguous	Not ambiguous	1117	Neg	FALSE	G	Fixed	FALSE	0	0	0	0	1	1	1	1	Neg	Neg	Neg	Neg	Pos
G019	HGR/BDD	No	Neg	NA	Neg	Neg	NA	Neg	Neg	Pos	Pos	4+	4+	0	0	Neg	Neg	0	0	0	0	NA	0	20/06/2015	NA	NA	Yes	18	Not ambiguous	Not ambiguous	1120	Neg	FALSE	G	Fixed	FALSE	1	1	0	0	0	0	0	0	Pos	Pos	Neg	Neg	Neg
G050	HGR/BDD	No	Neg	NA	Neg	Neg	NA	Neg	Neg	Neg	Neg	0	0	0	0	Pos	Pos	0	0	4+	4+	NA	0	17/06/2015	NA	NA	Yes	23	Not ambiguous	Not ambiguous	1122	Neg	FALSE	G	Fixed	FALSE	0	0	0	0	0	0	1	1	Neg	Neg	Neg	Neg	Neg
G051	HGR/BDD	No	Neg	NA	Neg	Neg	NA	Pos	Pos	Pos	Pos	0	0	4+	4+	Pos	Pos	0	0	2+	2+	NA	0	17/06/2015	NA	NA	Yes	30	Not ambiguous	Not ambiguous	1125	Neg	FALSE	G	Fixed	FALSE	0	0	1	1	0	0	1	1	Neg	Neg	Pos	Pos	Neg
G057	HGR/BDD	No	Neg	NA	Neg	Neg	NA	Neg	Neg	Pos	Pos	0	0	2+	2+	Neg	Neg	0	0	0	0	NA	0	17/06/2015	NA	NA	Yes	28	Not ambiguous	Not ambiguous	1127	Neg	FALSE	G	Fixed	FALSE	0	0	1	1	0	0	0	0	Neg	Neg	Pos	Pos	Neg
G058	HGR/BDD	No	Neg	NA	Neg	Neg	NA	Neg	Neg	Pos	Pos	3+	3+	0	0	Neg	Neg	0	0	0	0	NA	0	18/06/2015	NA	NA	Yes	37	Not ambiguous	Not ambiguous	1130	Neg	FALSE	G	Fixed	FALSE	1	1	0	0	0	0	0	0	Pos	Pos	Neg	Neg	Neg
G079	HGR/BDD	No	Neg	NA	Neg	Neg	NA	Neg	Neg	Pos	Pos	0	0	4+	4+	Neg	Neg	0	0	0	0	NA	0	18/06/2015	NA	NA	Yes	46	Not ambiguous	Not ambiguous	1132	Neg	FALSE	G	Fixed	FALSE	0	0	1	1	0	0	0	0	Neg	Neg	Pos	Pos	Neg
G115	HGR/BDD	No	Neg	NA	Neg	Neg	NA	Neg	Neg	Neg	Neg	0	0	0	0	Pos	Pos	0	0	3+	3+	NA	0	18/06/2015	NA	NA	Yes	30	Not ambiguous	Not ambiguous	1138	Neg	FALSE	G	Fixed	FALSE	0	0	0	0	0	0	1	1	Neg	Neg	Neg	Neg	Neg
G122	HGR/BDD	No	Neg	NA	Neg	Neg	NA	Neg	Neg	Neg	Neg	0	0	0	0	Pos	Pos	4+	4+	0	0	NA	0	18/06/2015	NA	NA	Yes	16	Not ambiguous	Not ambiguous	1140	Neg	FALSE	G	Fixed	FALSE	0	0	0	0	1	1	0	0	Neg	Neg	Neg	Neg	Pos
G128	HGR/BDD	No	Neg	NA	Neg	Neg	NA	Neg	Neg	Pos	Pos	4+	4+	0	0	Neg	Neg	0	0	0	0	NA	0	19/06/2015	NA	NA	Yes	30	Not ambiguous	Not ambiguous	1142	Neg	FALSE	G	Fixed	FALSE	1	1	0	0	0	0	0	0	Pos	Pos	Neg	Neg	Neg
G882	HGR/BDD	No	Neg	NA	Neg	Neg	NA	Neg	Neg	Neg	Neg	0	0	0	0	Pos	Pos	0	0	4+	4+	NA	0	30/07/2015	NA	NA	Yes	10	Not ambiguous	Not ambiguous	1145	Neg	FALSE	G	Fixed	FALSE	0	0	0	0	0	0	1	1	Neg	Neg	Neg	Neg	Neg
G875	HGR/BDD	No	Neg	NA	Neg	Neg	NA	Neg	Neg	Neg	Neg	0	0	0	0	Pos	Pos	0	0	3+	3+	NA	0	03/08/2015	NA	NA	Yes	30	Not ambiguous	Not ambiguous	1147	Neg	FALSE	G	Fixed	FALSE	0	0	0	0	0	0	1	1	Neg	Neg	Neg	Neg	Neg
G862	HGR/BDD	No	Neg	NA	Neg	Neg	NA	Neg	Neg	Pos	Pos	2+	2+	0	0	Pos	Pos	2+	2+	0	0	NA	0	29/07/2015	NA	NA	Yes	31	Not ambiguous	Not ambiguous	1150	Neg	FALSE	G	Fixed	FALSE	1	1	0	0	1	1	0	0	Pos	Pos	Neg	Neg	Pos
G859	HGR/BDD	No	Neg	NA	Neg	Neg	NA	Neg	Neg	Pos	Pos	2+	2+	0	0	Neg	Neg	0	0	0	0	NA	0	29/07/2015	NA	NA	Yes	11	Not ambiguous	Not ambiguous	1152	Neg	FALSE	G	Fixed	FALSE	1	1	0	0	0	0	0	0	Pos	Pos	Neg	Neg	Neg
G858	HGR/BDD	No	Neg	NA	Neg	Neg	NA	Neg	Neg	Pos	Pos	3+	3+	4+	4+	Pos	Pos	0	0	3+	3+	NA	0	29/07/2015	NA	NA	Yes	30	Not ambiguous	Not ambiguous	1155	Neg	FALSE	G	Fixed	FALSE	1	1	1	1	0	0	1	1	Pos	Pos	Pos	Pos	Neg
G857	HGR/BDD	No	Neg	NA	Neg	Neg	NA	Neg	Neg	Pos	Pos	4+	4+	0	0	Neg	Neg	0	0	0	0	NA	0	29/07/2015	NA	NA	Yes	33	Not ambiguous	Not ambiguous	1158	Neg	FALSE	G	Fixed	FALSE	1	1	0	0	0	0	0	0	Pos	Pos	Neg	Neg	Neg
G850	HGR/BDD	No	Neg	NA	Neg	Neg	NA	Neg	Neg	Neg	Neg	0	0	0	0	Neg	Neg	0	0	0	0	NA	0	28/07/2015	NA	NA	Yes	10	Not ambiguous	Not ambiguous	1161	Neg	FALSE	G	Fixed	FALSE	0	0	0	0	0	0	0	0	Neg	Neg	Neg	Neg	Neg
G830	HGR/BDD	No	Neg	NA	Neg	Neg	NA	Neg	Neg	Pos	Pos	4+	2+	0	0	Neg	Neg	0	0	0	0	NA	0	28/07/2015	NA	NA	Yes	18	Not ambiguous	Not ambiguous	1164	Neg	FALSE	G	Fixed	FALSE	1	1	0	0	0	0	0	0	Pos	Pos	Neg	Neg	Neg
G817	HGR/BDD	No	Neg	NA	Neg	Neg	NA	Pos	Pos	Neg	Neg	0	0	0	0	Neg	Neg	0	0	0	0	NA	0	27/07/2015	NA	NA	Yes	4	Not ambiguous	Not ambiguous	1167	Neg	FALSE	G	Fixed	FALSE	0	0	0	0	0	0	0	0	Neg	Neg	Neg	Neg	Neg
G814	HGR/BDD	No	Neg	NA	Neg	Neg	NA	Pos	Pos	Neg	Neg	0	0	0	0	Neg	Neg	0	0	0	0	NA	0	27/07/2015	NA	NA	Yes	6	Not ambiguous	Not ambiguous	1169	Neg	FALSE	G	Fixed	FALSE	0	0	0	0	0	0	0	0	Neg	Neg	Neg	Neg	Neg
G807	HGR/BDD	No	Neg	NA	Neg	Neg	NA	Neg	Neg	Neg	Neg	0	0	0	0	Pos	Pos	0	0	2+	2+	NA	0	25/07/2015	NA	NA	Yes	45	Not ambiguous	Not ambiguous	1171	Neg	FALSE	G	Fixed	FALSE	0	0	0	0	0	0	1	1	Neg	Neg	Neg	Neg	Neg
G795	HGR/BDD	No	Neg	NA	Neg	Neg	NA	Pos	Pos	Pos	Pos	2+	2+	3+	3+	Neg	Neg	0	0	0	0	NA	0	28/07/2015	NA	NA	Yes	47	Not ambiguous	Not ambiguous	1173	Neg	FALSE	G	Fixed	FALSE	1	1	1	1	0	0	0	0	Pos	Pos	Pos	Pos	Neg
G782	HGR/BDD	No	Neg	NA	Neg	Neg	NA	Neg	Neg	Pos	Pos	1+	1+	0	0	Pos	Pos	1+	1+	0	0	NA	0	23/07/2015	25	NA	Yes	32	Not ambiguous	Not ambiguous	1175	Neg	FALSE	G	Fixed	FALSE	1	1	0	0	1	1	0	0	Pos	Pos	Neg	Neg	Pos
G767	HGR/BDD	No	Neg	NA	Neg	Neg	NA	Neg	Neg	Pos	Pos	2+	2+	1+	4+	Neg	Neg	0	0	0	0	NA	0	29/07/2015	NA	NA	Yes	39	Not ambiguous	Not ambiguous	1178	Neg	FALSE	G	Fixed	FALSE	1	1	1	1	0	0	0	0	Pos	Pos	Pos	Pos	Neg
G762	HGR/BDD	No	Neg	NA	Neg	Neg	NA	Neg	Neg	Pos	Pos	1+	1+	0	0	Pos	Pos	1+	1+	0	0	NA	0	23/07/2015	25	NA	Yes	33	Not ambiguous	Not ambiguous	1180	Neg	FALSE	G	Fixed	FALSE	1	1	0	0	1	1	0	0	Pos	Pos	Neg	Neg	Pos
G757	HGR/BDD	No	Neg	NA	Neg	Neg	NA	Pos	Pos	Pos	Pos	0	0	1+	1+	Neg	Neg	0	0	0	0	NA	0	21/07/2015	NA	NA	Yes	45	Not ambiguous	Not ambiguous	1182	Neg	FALSE	G	Fixed	FALSE	0	0	1	1	0	0	0	0	Neg	Neg	Pos	Pos	Neg
G748	HGR/BDD	No	Neg	NA	Neg	Neg	NA	Neg	Neg	Neg	Neg	0	0	0	0	Pos	Pos	0	0	2+	2+	NA	0	21/07/2015	NA	NA	Yes	21	Not ambiguous	Not ambiguous	1184	Neg	FALSE	G	Fixed	FALSE	0	0	0	0	0	0	1	1	Neg	Neg	Neg	Neg	Neg
P558	HGR/MASIMANIMBA	Yes	Neg	Pos	Neg	Pos	NA	Pos	Pos	Pos	Pos	1+	3+	0	0	Pos	Pos	2+	2+	1+	0	NA	0	14/08/2015	1	75	Yes	15	Not ambiguous	Not ambiguous	1208	Pos	TRUE	P	Fixed	FALSE	1	1	0	0	1	1	1	0	Pos	Pos	Neg	Neg	Pos
P290	HGR/MASIMANIMBA	No	NA	Pos	NA	NA	Pos	Pos	Pos	Pos	Pos	2+	2+	2+	2+	Pos	Pos	3+	3+	2+	2+	NA	0	25/06/2015	NA	440	Yes	11	Not ambiguous	Not ambiguous	1211	Pos	TRUE	P	Fixed	FALSE	1	1	1	1	1	1	1	1	Pos	Pos	Pos	Pos	Pos
P149	HGR/MASIMANIMBA	No	Neg	Pos	Pos	Pos	Pos	Pos	Pos	Pos	Pos	2+	0	3+	2+	Pos	Pos	0	2+	3+	1+	NA	0	08/06/2015	NA	9	Yes	14	Not ambiguous	Not ambiguous	1215	Pos	TRUE	P	Fixed	FALSE	1	0	1	1	0	1	1	1	Pos	Neg	Pos	Pos	Neg
L087	HS/NKARA	No	Neg	Pos	Neg	Neg	NA	Neg	Neg	Neg	Neg	0	0	0	0	Pos	Pos	0	0	1+	1+	NA	0	02/06/2015	NA	565	Yes	25	Not ambiguous	Not ambiguous	1218	Pos	TRUE	L	Fixed	FALSE	0	0	0	0	0	0	1	1	Neg	Neg	Neg	Neg	Neg
L257	HS NKARA	No	Pos	Neg	Pos	Pos	NA	Neg	Neg	Pos	Pos	1+	1+	0	0	Pos	Pos	1+	1+	1+	1+	NA	0	26/06/2015	5	3	Yes	30	Not ambiguous	Not ambiguous	1221	Pos	TRUE	L	Fixed	FALSE	1	1	0	0	1	1	1	1	Pos	Pos	Neg	Neg	Pos
L325	HS NKARA	Yes	Pos	Neg	Pos	Pos	NA	Pos	Pos	Neg	Neg	0	0	0	0	Pos	Pos	0	0	2+	2+	NA	0	10/07/2015	NA	5	Yes	28	Not ambiguous	Not ambiguous	1224	Pos	TRUE	L	Fixed	FALSE	0	0	0	0	0	0	1	1	Neg	Neg	Neg	Neg	Neg
L355	HS NKARA	No	Neg	Neg	Neg	Pos	NA	Pos	Pos	Pos	Pos	1+	1+	1+	1+	Neg	Neg	0	0	0	0	NA	0	17/07/2015	3	2	Yes	11	Not ambiguous	Not ambiguous	1226	Pos	TRUE	L	Fixed	FALSE	1	1	1	1	0	0	0	0	Pos	Pos	Pos	Pos	Neg
L363	HS NKARA	No	Pos	Neg	Pos	Pos	NA	Neg	Neg	Neg	Neg	0	0	0	0	Pos	Pos	2+	2+	0	0	NA	0	19/07/2015	NA	0	Yes	54	Not ambiguous	Not ambiguous	1228	Pos	TRUE	L	Fixed	FALSE	0	0	0	0	1	1	0	0	Neg	Neg	Neg	Neg	Pos
L431	HS NKARA	No	Neg	Neg	Pos	Pos	NA	Pos	Pos	Pos	Pos	2+	2+	1+	1+	Neg	Neg	0	0	0	0	NA	0	01/08/2015	NA	2	Yes	28	Not ambiguous	Not ambiguous	1230	Pos	TRUE	L	Fixed	FALSE	1	1	1	1	0	0	0	0	Pos	Pos	Pos	Pos	Neg
L432	HS NKARA	No	Pos	Neg	Neg	Pos	NA	Pos	Pos	Neg	Neg	0	0	0	0	Neg	Neg	0	0	0	0	NA	0	01/08/2015	NA	2	Yes	53	Not ambiguous	Not ambiguous	1232	Pos	TRUE	L	Fixed	FALSE	0	0	0	0	0	0	0	0	Neg	Neg	Neg	Neg	Neg
K135	CSR/BANGUMI	No	Neg	Pos	Neg	Pos	NA	Pos	Pos	Pos	Pos	2+	2+	3+	3+	Pos	Pos	2+	2+	3+	3+	NA	0	29/06/2015	NA	3	Yes	37	Not ambiguous	Not ambiguous	1235	Pos	TRUE	K	Fixed	FALSE	1	1	1	1	1	1	1	1	Pos	Pos	Pos	Pos	Pos
K155	CSR/BANGUMI	No	NA	Pos	NA	NA	Pos	Pos	Pos	Pos	Pos	3+	3+	3+	3+	Pos	Pos	3+	3+	3+	3+	NA	0	02/07/2015	NA	264	Yes	35	Ambiguous	Ambiguous	1238	Pos	TRUE	K	Fixed	FALSE	1	1	1	1	1	1	1	1	Pos	Pos	Pos	Pos	Pos
K302	CSR/BANGUMI	No	Neg	Neg	Pos	Pos	Neg	Pos	Pos	Neg	Neg	0	0	0	0	Pos	Pos	3+	3+	2+	2+	NA	0	01/08/2015	NA	30	Yes	17	Ambiguous	Ambiguous	1240	Pos	TRUE	K	Fixed	FALSE	0	0	0	0	1	1	1	1	Neg	Neg	Neg	Neg	Pos
P562	HGR/MASIMANIMBA	No	Neg	Pos	Neg	Pos	Neg	Pos	Pos	Pos	Pos	2+	2+	0	0	Pos	Pos	2+	0	2+	3+	NA	0	14/08/2015	NA	372	Yes	45	Not ambiguous	Not ambiguous	1244	Pos	TRUE	P	Fixed	FALSE	1	1	0	0	1	0	1	1	Pos	Pos	Neg	Neg	Pos
P019	HGR/MASIMANIMBA	No	Neg	NA	Neg	Neg	NA	Neg	Neg	Neg	Neg	0	0	0	0	Pos	Pos	0	0	1+	1+	NA	0	27/05/2015	NA	NA	Yes	10	Not ambiguous	Not ambiguous	1246	Neg	FALSE	P	Fixed	FALSE	0	0	0	0	0	0	1	1	Neg	Neg	Neg	Neg	Neg
M029	HS DE KITOY	No	Neg	Pos	Pos	Pos	Pos	Pos	Pos	Pos	Pos	2+	2+	2+	2+	Pos	Pos	2+	2+	2+	2+	NA	0	05/06/2015	NA	218	Yes	37	Not ambiguous	Not ambiguous	1249	Pos	TRUE	M	Fixed	FALSE	1	1	1	1	1	1	1	1	Pos	Pos	Pos	Pos	Pos
M104	HS DE KITOY	No	Neg	Pos	Pos	Pos	NA	Pos	Pos	Pos	Pos	1+	1+	1+	1+	Pos	Pos	2+	2+	2+	2+	NA	0	19/06/2015	25	13	Yes	30	Not ambiguous	Not ambiguous	1252	Pos	TRUE	M	Fixed	FALSE	1	1	1	1	1	1	1	1	Pos	Pos	Pos	Pos	Pos
M419	HS DE KITOY	No	NA	Pos	NA	NA	Pos	Pos	Pos	Pos	Pos	1+	1+	1+	1+	Pos	Pos	3+	2+	3+	2+	NA	0	30/07/2015	11	138	Yes	9	Not ambiguous	Not ambiguous	1254	Pos	TRUE	M	Fixed	FALSE	1	1	1	1	1	1	1	1	Pos	Pos	Pos	Pos	Pos
M505	HS DE KITOY	No	Neg	Pos	Neg	Pos	NA	Pos	Pos	Pos	Pos	1+	1+	1+	1+	Pos	Pos	2+	2+	2+	2+	NA	0	04/08/2015	5	46	Yes	12	Not ambiguous	Not ambiguous	1256	Pos	TRUE	M	Fixed	FALSE	1	1	1	1	1	1	1	1	Pos	Pos	Pos	Pos	Pos
M502	HS DE KITOY	No	NA	Pos	NA	NA	Pos	Pos	Pos	Pos	Pos	1+	1+	1+	1+	Pos	Pos	1+	0	1+	1+	NA	0	04/08/2015	5	36	Yes	40	Not ambiguous	Not ambiguous	1258	Pos	TRUE	M	Fixed	FALSE	1	1	1	1	1	0	1	1	Pos	Pos	Pos	Pos	Pos
A033	UM/BDD	No	Pos	Neg	NA	NA	Neg	Pos	Pos	Neg	Neg	0	0	0	0	Neg	Neg	0	0	0	0	NA	0	16/06/2015	NA	1	Yes	37	Not ambiguous	Ambiguous	1260	Pos	TRUE	A	Mobile	FALSE	0	0	0	0	0	0	0	0	Neg	Neg	Neg	Neg	Neg
E1947	IDIOFA	No	Pos	Neg	Neg	Neg	NA	Pos	Pos	Pos	Pos	1+	1+	0	0	Pos	Pos	1+	2+	0	0	NA	0	14/06/2015	8	4	Yes	16	Not ambiguous	Not ambiguous	1266	Pos	TRUE	E	Mobile	FALSE	1	1	0	0	1	1	0	0	Pos	Pos	Neg	Neg	Pos
E1948	IDIOFA	No	Neg	Neg	Pos	Pos	NA	Pos	Pos	Pos	Pos	1+	1+	0	0	Pos	Pos	2+	2+	0	0	NA	0	14/06/2015	11	4	Yes	15	Not ambiguous	Not ambiguous	1268	Pos	TRUE	E	Mobile	FALSE	1	1	0	0	1	1	0	0	Pos	Pos	Neg	Neg	Pos
E1995	IDIOFA	No	Neg	Neg	Pos	Neg	NA	Pos	Pos	Neg	Neg	0	0	0	0	Pos	Pos	2+	2+	0	0	NA	0	15/06/2015	NA	3	Yes	47	Not ambiguous	Not ambiguous	1270	Pos	TRUE	E	Mobile	FALSE	0	0	0	0	1	1	0	0	Neg	Neg	Neg	Neg	Pos
E2142	IDIOFA	No	Neg	Neg	Neg	Pos	NA	Pos	Pos	Neg	Neg	0	0	0	0	Pos	Pos	1+	1+	0	0	NA	0	16/06/2015	NA	4	Yes	45	Not ambiguous	Not ambiguous	1272	Pos	TRUE	E	Mobile	FALSE	0	0	0	0	1	1	0	0	Neg	Neg	Neg	Neg	Pos
E2174	IDIOFA	No	Neg	Neg	Pos	Pos	NA	Pos	Pos	Neg	Neg	0	0	0	0	Pos	Pos	2+	2+	0	0	NA	0	16/06/2015	NA	4	Yes	56	Not ambiguous	Not ambiguous	1274	Pos	TRUE	E	Mobile	FALSE	0	0	0	0	1	1	0	0	Neg	Neg	Neg	Neg	Pos
E2204	IDIOFA	No	Pos	Neg	Neg	Neg	NA	Pos	Pos	Neg	Neg	0	0	0	0	Neg	Neg	0	0	0	0	NA	0	18/06/2015	NA	1	Yes	8	Not ambiguous	Not ambiguous	1276	Pos	TRUE	E	Mobile	FALSE	0	0	0	0	0	0	0	0	Neg	Neg	Neg	Neg	Neg
E2311	IDIOFA	No	Pos	Neg	Neg	Neg	NA	Pos	Pos	Neg	Neg	0	0	0	0	Pos	Pos	1+	1+	0	0	NA	0	16/06/2015	NA	4	Yes	32	Not ambiguous	Not ambiguous	1280	Pos	TRUE	E	Mobile	FALSE	0	0	0	0	1	1	0	0	Neg	Neg	Neg	Neg	Pos
E2331	IDIOFA	No	Pos	Neg	Neg	Neg	NA	Pos	Pos	Pos	Pos	1+	1+	2+	2+	Neg	Neg	0	0	0	0	NA	0	16/06/2015	11	2	Yes	8	Not ambiguous	Not ambiguous	1283	Pos	TRUE	E	Mobile	FALSE	1	1	1	1	0	0	0	0	Pos	Pos	Pos	Pos	Neg
E2430	IDIOFA	No	Neg	NA	Neg	Neg	NA	Pos	Pos	Neg	Neg	0	0	0	0	Neg	Neg	0	0	0	0	NA	0	20/06/2015	NA	NA	Yes	27	Not ambiguous	Not ambiguous	1286	Neg	FALSE	E	Mobile	FALSE	0	0	0	0	0	0	0	0	Neg	Neg	Neg	Neg	Neg
E2423	IDIOFA	No	Pos	Neg	Neg	Neg	NA	Pos	Pos	Neg	Neg	0	0	0	0	Neg	Neg	0	0	0	0	NA	0	17/06/2015	NA	3	Yes	39	Not ambiguous	Not ambiguous	1288	Pos	TRUE	E	Mobile	FALSE	0	0	0	0	0	0	0	0	Neg	Neg	Neg	Neg	Neg
E2508	IDIOFA	No	Pos	Neg	Neg	Neg	NA	Pos	Pos	Neg	Neg	0	0	0	0	Neg	Neg	0	0	0	0	NA	0	18/06/2015	NA	2	Yes	44	Not ambiguous	Not ambiguous	1290	Pos	TRUE	E	Mobile	FALSE	0	0	0	0	0	0	0	0	Neg	Neg	Neg	Neg	Neg
E2631	IDIOFA	No	Neg	Neg	Neg	Neg	Pos	Pos	Pos	Neg	Neg	0	0	0	0	Pos	Pos	1+	1+	0	0	NA	0	18/06/2015	NA	4	Yes	46	Not ambiguous	Not ambiguous	1293	Pos	TRUE	E	Mobile	FALSE	0	0	0	0	1	1	0	0	Neg	Neg	Neg	Neg	Pos
E2657	IDIOFA	No	Pos	Neg	Neg	Neg	NA	Pos	Pos	Pos	Pos	1+	1+	0	0	Pos	Pos	1+	1+	0	0	NA	0	18/06/2015	17	3	Yes	13	Not ambiguous	Not ambiguous	1296	Pos	TRUE	E	Mobile	FALSE	1	1	0	0	1	1	0	0	Pos	Pos	Neg	Neg	Pos
E2953	IDIOFA	No	Neg	Neg	Neg	Neg	Pos	Pos	Pos	Pos	Pos	2+	2+	0	0	Neg	Neg	0	0	0	0	NA	0	20/06/2015	NA	14	Yes	53	Not ambiguous	Not ambiguous	1299	Pos	TRUE	E	Mobile	FALSE	1	1	0	0	0	0	0	0	Pos	Pos	Neg	Neg	Neg
E2970	IDIOFA	No	Pos	Neg	Neg	Neg	NA	Pos	Pos	Neg	Neg	0	0	0	0	Pos	Pos	2+	2+	0	0	NA	0	20/06/2015	NA	2	Yes	76	Not ambiguous	Not ambiguous	1301	Pos	TRUE	E	Mobile	FALSE	0	0	0	0	1	1	0	0	Neg	Neg	Neg	Neg	Pos
E2971	IDIOFA	No	Pos	Neg	Neg	Neg	NA	Pos	Pos	Neg	Neg	0	0	0	0	Neg	Neg	0	0	0	0	NA	0	20/06/2015	NA	3	Yes	11	Not ambiguous	Not ambiguous	1304	Pos	TRUE	E	Mobile	FALSE	0	0	0	0	0	0	0	0	Neg	Neg	Neg	Neg	Neg
E3392	IDIOFA	No	Neg	Neg	Pos	Pos	NA	Pos	Pos	Neg	Neg	0	0	0	0	Neg	Neg	0	0	0	0	NA	0	24/06/2015	NA	3	Yes	20	Not ambiguous	Not ambiguous	1307	Pos	TRUE	E	Mobile	FALSE	0	0	0	0	0	0	0	0	Neg	Neg	Neg	Neg	Neg
E3650	IDIOFA	No	Pos	Neg	Neg	Neg	NA	Pos	Pos	Pos	Pos	1+	1+	0	0	Neg	Neg	0	0	0	0	NA	0	24/06/2015	8	2	Yes	38	Not ambiguous	Not ambiguous	1310	Pos	TRUE	E	Mobile	FALSE	1	1	0	0	0	0	0	0	Pos	Pos	Neg	Neg	Neg
E3862	IDIOFA	No	Neg	Neg	Neg	Neg	Pos	Pos	Pos	Neg	Neg	0	0	0	0	Pos	Pos	1+	1+	2+	2+	NA	0	25/06/2015	NA	30	Yes	4	Not ambiguous	Not ambiguous	1314	Pos	TRUE	E	Mobile	FALSE	0	0	0	0	1	1	1	1	Neg	Neg	Neg	Neg	Pos
J351	HGR/BAGATA	No	Pos	Neg	NA	NA	NA	Pos	Pos	Neg	Neg	0	0	0	0	Pos	Pos	1+	1+	0	0	NA	0	28/07/2015	NA	2	Yes	20	Not ambiguous	Not ambiguous	1316	Pos	TRUE	J	Fixed	FALSE	0	0	0	0	1	1	0	0	Neg	Neg	Neg	Neg	Pos
J373	HGR/BAGATA	No	NA	Neg	NA	NA	Pos	Pos	Pos	Neg	Neg	0	0	0	0	Pos	Pos	2+	2+	0	0	NA	0	30/07/2015	NA	5	Yes	13	Not ambiguous	Not ambiguous	1318	Pos	TRUE	J	Fixed	FALSE	0	0	0	0	1	1	0	0	Neg	Neg	Neg	Neg	Pos
J394	HGR/BAGATA	No	Pos	Neg	NA	NA	NA	Pos	Pos	Pos	Pos	2+	2+	0	0	Neg	Neg	0	0	0	0	NA	0	03/08/2015	NA	4	Yes	36	Not ambiguous	Not ambiguous	1320	Pos	TRUE	J	Fixed	FALSE	1	1	0	0	0	0	0	0	Pos	Pos	Neg	Neg	Neg
Q621	HGR YASA-BONGA	No	Neg	Pos	Pos	Pos	Neg	Pos	Pos	Pos	Pos	0	0	3+	3+	Pos	Pos	3+	3+	0	0	NA	0	27/07/2015	NA	650	Yes	30	Not ambiguous	Not ambiguous	1323	Pos	TRUE	Q	Fixed	FALSE	0	0	1	1	1	1	0	0	Neg	Neg	Pos	Pos	Pos
Q624	HGR YASA-BONGA	No	NA	Neg	NA	NA	Pos	Pos	Pos	Pos	Pos	0	0	2+	2+	Pos	Pos	2+	2+	0	0	NA	0	27/07/2015	NA	19	Yes	7	Not ambiguous	Not ambiguous	1327	Pos	TRUE	Q	Fixed	FALSE	0	0	1	1	1	1	0	0	Neg	Neg	Pos	Pos	Pos
D015	UM/MOKALA	No	Neg	Neg	Neg	Pos	NA	Pos	Neg	Neg	Neg	0	0	0	0	Pos	Pos	2+	1+	3+	3+	NA	0	21/07/2015	NA	1	Yes	35	Ambiguous	Not ambiguous	1330	Pos	TRUE	D	Mobile	FALSE	0	0	0	0	1	1	1	1	Neg	Neg	Neg	Neg	Pos
L450	HS NKARA	No	Neg	Neg	Neg	Pos	NA	Neg	Neg	Neg	Neg	0	0	0	0	Pos	Pos	1+	1+	1+	1+	NA	0	04/08/2015	NA	4	Yes	58	Not ambiguous	Not ambiguous	1332	Pos	TRUE	L	Fixed	FALSE	0	0	0	0	1	1	1	1	Neg	Neg	Neg	Neg	Pos
L430	HS NKARA	No	Pos	Neg	Pos	Pos	NA	Pos	Pos	Pos	Pos	1+	1+	1+	1+	Pos	Pos	1+	1+	1+	1+	NA	0	01/08/2015	25	3	Yes	29	Not ambiguous	Not ambiguous	1335	Pos	TRUE	L	Fixed	FALSE	1	1	1	1	1	1	1	1	Pos	Pos	Pos	Pos	Pos
D014	UM/MOKALA	No	Neg	Neg	Neg	Pos	NA	Pos	Pos	Pos	Pos	2+	2+	1+	1+	Neg	Neg	0	0	0	0	NA	0	21/07/2015	NA	1	Yes	53	Not ambiguous	Not ambiguous	1338	Pos	TRUE	D	Mobile	FALSE	1	1	1	1	0	0	0	0	Pos	Pos	Pos	Pos	Neg
D069	UM/MOKALA	No	NA	Neg	NA	NA	Pos	Pos	Pos	Pos	Pos	2+	2+	1+	2+	Neg	Neg	0	0	0	0	NA	0	22/07/2015	NA	1	Yes	8	Not ambiguous	Not ambiguous	1341	Pos	TRUE	D	Mobile	FALSE	1	1	1	1	0	0	0	0	Pos	Pos	Pos	Pos	Neg
D302	UM/MOKALA	No	Neg	Neg	Neg	Pos	Pos	Pos	Pos	Pos	Pos	3+	2+	2+	1+	Pos	Pos	3+	2+	1+	1+	NA	0	23/07/2015	NA	3	Yes	21	Not ambiguous	Not ambiguous	1344	Pos	TRUE	D	Mobile	FALSE	1	1	1	1	1	1	1	1	Pos	Pos	Pos	Pos	Pos
D312	UM/MOKALA	No	Pos	Neg	NA	NA	NA	Pos	Pos	Neg	Neg	0	0	0	0	Pos	Pos	0	0	1+	1+	NA	0	23/07/2015	NA	1	Yes	36	Not ambiguous	Not ambiguous	1347	Pos	TRUE	D	Mobile	FALSE	0	0	0	0	0	0	1	1	Neg	Neg	Neg	Neg	Neg
D325	UM/MOKALA	No	Neg	Neg	Pos	Pos	NA	Pos	Pos	Pos	Neg	0	0	1+	0	Neg	Neg	0	0	0	0	NA	0	23/07/2015	NA	2	Yes	7	Not ambiguous	Not ambiguous	1351	Pos	TRUE	D	Mobile	FALSE	0	0	1	0	0	0	0	0	Neg	Neg	Pos	Neg	Neg
D326	UM/MOKALA	No	Neg	Neg	Neg	Pos	NA	Pos	Pos	Pos	Pos	3+	3+	1+	1+	Neg	Neg	0	0	0	0	NA	0	23/07/2015	NA	3	Yes	41	Not ambiguous	Not ambiguous	1353	Pos	TRUE	D	Mobile	FALSE	1	1	1	1	0	0	0	0	Pos	Pos	Pos	Pos	Neg
D2034	UM/MOKALA	No	Neg	NA	Neg	Neg	NA	Neg	Neg	Pos	Pos	0	0	2+	2+	Neg	Neg	0	0	0	0	NA	0	26/07/2015	NA	NA	Yes	25	Not ambiguous	Not ambiguous	1357	Neg	FALSE	D	Mobile	FALSE	0	0	1	1	0	0	0	0	Neg	Neg	Pos	Pos	Neg
D2703	UM/MOKALA	No	Neg	Neg	NA	Pos	Neg	Pos	Pos	Pos	Pos	3+	2+	2+	2+	Pos	Pos	3+	3+	3+	3+	NA	0	01/08/2015	NA	0	Yes	46	Not ambiguous	Not ambiguous	1359	Pos	TRUE	D	Mobile	FALSE	1	1	1	1	1	1	1	1	Pos	Pos	Pos	Pos	Pos
D3745	UM/MOKALA	No	NA	Neg	NA	NA	Pos	Pos	Pos	Pos	Pos	2+	2+	2+	3+	Pos	Pos	2+	3+	2+	2+	NA	0	05/08/2015	NA	118	Yes	35	Not ambiguous	Not ambiguous	1362	Pos	TRUE	D	Mobile	FALSE	1	1	1	1	1	1	1	1	Pos	Pos	Pos	Pos	Pos
D3817	UM/MOKALA	No	Neg	Neg	NA	Pos	NA	Pos	Pos	Pos	Pos	0	0	1+	1+	Pos	Pos	2+	2+	2+	2+	NA	0	06/08/2015	NA	2	Yes	74	Not ambiguous	Not ambiguous	1365	Pos	TRUE	D	Mobile	FALSE	0	0	1	1	1	1	1	1	Neg	Neg	Pos	Pos	Pos
D3842	UM/MOKALA	No	Neg	Neg	NA	Pos	NA	Pos	Pos	Pos	Pos	3+	3+	2+	3+	Pos	Pos	3+	3+	3+	3+	NA	0	06/08/2015	NA	1	Yes	39	Not ambiguous	Not ambiguous	1367	Pos	TRUE	D	Mobile	FALSE	1	1	1	1	1	1	1	1	Pos	Pos	Pos	Pos	Pos
K257	CSR/BANGUMI	No	Neg	NA	Neg	Neg	NA	Neg	Neg	Neg	Neg	0	0	0	0	Pos	Pos	2+	2+	0	0	NA	0	24/07/2015	NA	NA	Yes	23	Not ambiguous	Not ambiguous	1373	Neg	FALSE	K	Fixed	FALSE	0	0	0	0	1	1	0	0	Neg	Neg	Neg	Neg	Pos
K245	CSR/BANGUMI	No	Neg	NA	Neg	Neg	NA	Neg	Neg	Neg	Neg	0	0	0	0	Pos	Pos	2+	2+	0	0	NA	0	20/07/2015	NA	NA	Yes	55	Not ambiguous	Not ambiguous	1377	Neg	FALSE	K	Fixed	FALSE	0	0	0	0	1	1	0	0	Neg	Neg	Neg	Neg	Pos
K239	CSR/BANGUMI	No	Neg	NA	Neg	Neg	Neg	Neg	Neg	Neg	Neg	0	0	0	0	Pos	Pos	2+	2+	0	0	NA	0	20/07/2015	1	NA	Yes	4	Not ambiguous	Not ambiguous	1380	Neg	FALSE	K	Fixed	FALSE	0	0	0	0	1	1	0	0	Neg	Neg	Neg	Neg	Pos
K224	CSR/BANGUMI	No	Neg	NA	Neg	Neg	NA	Neg	Neg	Neg	Neg	0	0	0	0	Pos	Pos	0	3+	2+	1+	NA	0	15/07/2015	NA	NA	Yes	25	Not ambiguous	Not ambiguous	1383	Neg	FALSE	K	Fixed	FALSE	0	0	0	0	0	1	1	1	Neg	Neg	Neg	Neg	Neg
K212	CSR/BANGUMI	No	Neg	NA	Neg	Neg	NA	Neg	Neg	Neg	Neg	0	0	0	0	Pos	Pos	3+	3+	2+	2+	NA	0	13/07/2015	NA	NA	Yes	13	Not ambiguous	Not ambiguous	1391	Neg	FALSE	K	Fixed	FALSE	0	0	0	0	1	1	1	1	Neg	Neg	Neg	Neg	Pos
K184	CSR/BANGUMI	No	Neg	NA	Neg	Neg	NA	Neg	Neg	Neg	Neg	0	0	0	0	Pos	Pos	2+	2+	2+	2+	NA	0	07/07/2015	NA	NA	Yes	4	Not ambiguous	Not ambiguous	1394	Neg	FALSE	K	Fixed	FALSE	0	0	0	0	1	1	1	1	Neg	Neg	Neg	Neg	Pos
K175	CSR/BANGUMI	No	Neg	NA	Neg	Neg	NA	Neg	Neg	Neg	Neg	0	0	0	0	Pos	Pos	0	0	2+	2+	NA	0	07/07/2015	NA	NA	Yes	41	Not ambiguous	Not ambiguous	1397	Neg	FALSE	K	Fixed	FALSE	0	0	0	0	0	0	1	1	Neg	Neg	Neg	Neg	Neg
K166	CSR/BANGUMI	No	Neg	NA	Neg	Neg	NA	Pos	Pos	Neg	Neg	0	0	0	0	Neg	Neg	0	0	0	0	NA	0	03/07/2015	NA	NA	Yes	30	Ambiguous	Ambiguous	1400	Neg	FALSE	K	Fixed	FALSE	0	0	0	0	0	0	0	0	Neg	Neg	Neg	Neg	Neg
K161	CSR/BANGUMI	No	Neg	NA	Neg	Neg	NA	Neg	Neg	Neg	Neg	0	0	0	0	Pos	Pos	2+	2+	0	0	NA	0	03/07/2015	NA	NA	Yes	47	Not ambiguous	Not ambiguous	1403	Neg	FALSE	K	Fixed	FALSE	0	0	0	0	1	1	0	0	Neg	Neg	Neg	Neg	Pos
K123	CSR/BANGUMI	No	Neg	NA	Neg	Neg	NA	Neg	Neg	Pos	Pos	1+	1+	0	0	Neg	Neg	0	0	0	0	NA	0	26/06/2015	11	NA	Yes	27	Not ambiguous	Not ambiguous	1405	Neg	FALSE	K	Fixed	FALSE	1	1	0	0	0	0	0	0	Pos	Pos	Neg	Neg	Neg
K128	CSR/BANGUMI	No	Neg	NA	Neg	Neg	NA	Neg	Neg	Neg	Neg	0	0	0	0	Pos	Pos	2+	2+	2+	2+	NA	0	27/06/2015	NA	NA	Yes	20	Not ambiguous	Not ambiguous	1407	Neg	FALSE	K	Fixed	FALSE	0	0	0	0	1	1	1	1	Neg	Neg	Neg	Neg	Pos
K100	CSR/BANGUMI	No	Neg	NA	Neg	Neg	NA	Neg	Neg	Neg	Neg	0	0	0	0	Pos	Pos	1+	1+	0	0	NA	0	23/06/2015	NA	NA	Yes	33	Not ambiguous	Not ambiguous	1409	Neg	FALSE	K	Fixed	FALSE	0	0	0	0	1	1	0	0	Neg	Neg	Neg	Neg	Pos
K095	CSR/BANGUMI	No	Neg	NA	Neg	Neg	NA	Neg	Neg	Neg	Neg	0	0	0	0	Pos	Pos	0	0	3+	3+	NA	0	23/06/2015	NA	NA	Yes	19	Not ambiguous	Not ambiguous	1412	Neg	FALSE	K	Fixed	FALSE	0	0	0	0	0	0	1	1	Neg	Neg	Neg	Neg	Neg
K092	CSR/BANGUMI	No	Neg	NA	Neg	Neg	NA	Neg	Neg	Neg	Neg	0	0	0	0	Pos	Pos	3+	3+	1+	1+	NA	0	23/06/2015	NA	NA	Yes	3	Not ambiguous	Not ambiguous	1415	Neg	FALSE	K	Fixed	FALSE	0	0	0	0	1	1	1	1	Neg	Neg	Neg	Neg	Pos
K088	CSR/BANGUMI	No	Neg	NA	Neg	Neg	NA	Neg	Neg	Pos	Pos	0	0	1+	1+	Pos	Pos	2+	2+	1+	1+	NA	0	23/06/2015	NA	NA	Yes	2	Not ambiguous	Not ambiguous	1418	Neg	FALSE	K	Fixed	FALSE	0	0	1	1	1	1	1	1	Neg	Neg	Pos	Pos	Pos
K084	CSR/BANGUMI	No	Neg	NA	Neg	Neg	NA	Neg	Neg	Neg	Neg	0	0	0	0	Pos	Pos	2+	2+	0	0	NA	0	22/06/2015	NA	NA	Yes	45	Not ambiguous	Not ambiguous	1421	Neg	FALSE	K	Fixed	FALSE	0	0	0	0	1	1	0	0	Neg	Neg	Neg	Neg	Pos
K081	CSR/BANGUMI	No	Neg	NA	Neg	Neg	NA	Neg	Neg	Pos	Pos	2+	2+	0	0	Neg	Neg	0	0	0	0	NA	0	20/06/2015	NA	NA	Yes	32	Not ambiguous	Not ambiguous	1423	Neg	FALSE	K	Fixed	FALSE	1	1	0	0	0	0	0	0	Pos	Pos	Neg	Neg	Neg
K070	CSR/BANGUMI	No	Neg	NA	Neg	Neg	NA	Neg	Neg	Neg	Neg	0	0	0	0	Pos	Pos	0	0	1+	1+	NA	0	19/06/2015	NA	NA	Yes	32	Not ambiguous	Not ambiguous	1426	Neg	FALSE	K	Fixed	FALSE	0	0	0	0	0	0	1	1	Neg	Neg	Neg	Neg	Neg
K056	CSR/BANGUMI	No	Neg	NA	Neg	Neg	NA	Neg	Neg	Neg	Neg	0	0	0	0	Pos	Pos	1+	1+	0	0	NA	0	18/06/2015	NA	NA	Yes	28	Not ambiguous	Not ambiguous	1430	Neg	FALSE	K	Fixed	FALSE	0	0	0	0	1	1	0	0	Neg	Neg	Neg	Neg	Pos
K044	CSR/BANGUMI	No	Neg	NA	Neg	Neg	NA	Neg	Neg	Pos	Pos	0	0	1+	1+	Pos	Pos	0	0	1+	1+	NA	0	17/06/2015	NA	NA	Yes	34	Not ambiguous	Not ambiguous	1433	Neg	FALSE	K	Fixed	FALSE	0	0	1	1	0	0	1	1	Neg	Neg	Pos	Pos	Neg
K027	CSR/BANGUMI	No	Neg	NA	Neg	Neg	NA	Neg	Neg	Neg	Neg	0	0	0	0	Pos	Pos	0	0	2+	1+	NA	0	16/06/2015	NA	NA	Yes	19	Not ambiguous	Not ambiguous	1439	Neg	FALSE	K	Fixed	FALSE	0	0	0	0	0	0	1	1	Neg	Neg	Neg	Neg	Neg
K011	CSR/BANGUMI	No	Neg	NA	Neg	Neg	NA	Neg	Neg	Pos	Pos	0	0	1+	1+	Neg	Neg	0	0	0	0	NA	0	12/06/2015	NA	NA	Yes	70	Not ambiguous	Not ambiguous	1441	Neg	FALSE	K	Fixed	FALSE	0	0	1	1	0	0	0	0	Neg	Neg	Pos	Pos	Neg
K002	CSR/BANGUMI	No	Neg	NA	Neg	Neg	NA	Neg	Neg	Neg	Neg	0	0	0	0	Pos	Pos	1+	1+	1+	1+	NA	0	10/06/2015	NA	NA	Yes	1	Not ambiguous	Not ambiguous	1444	Neg	FALSE	K	Fixed	FALSE	0	0	0	0	1	1	1	1	Neg	Neg	Neg	Neg	Pos
K163	CSR/BANGUMI	No	Neg	NA	Neg	Neg	NA	Neg	Neg	Neg	Neg	0	0	0	0	Pos	Pos	0	0	2+	2+	NA	0	03/07/2015	NA	NA	Yes	32	Not ambiguous	Not ambiguous	1447	Neg	FALSE	K	Fixed	FALSE	0	0	0	0	0	0	1	1	Neg	Neg	Neg	Neg	Neg
K201	CSR/BANGUMI	No	Neg	NA	Neg	Neg	NA	Neg	Neg	Pos	Pos	3+	3+	1+	0	Pos	Pos	3+	0	0	3+	NA	0	10/07/2015	NA	NA	Yes	30	Not ambiguous	Not ambiguous	1450	Neg	FALSE	K	Fixed	FALSE	1	1	1	0	1	0	0	1	Pos	Pos	Pos	Neg	Pos
Q724	HGR/YASA-BONGA	No	NA	Neg	Pos	Pos	Neg	Pos	Pos	Pos	Pos	1+	1+	0	0	Pos	Pos	2+	2+	1+	1+	NA	0	04/08/2015	4	7	Yes	55	Not ambiguous	Not ambiguous	1452	Pos	TRUE	Q	Fixed	FALSE	1	1	0	0	1	1	1	1	Pos	Pos	Neg	Neg	Pos
K231	CSR/BANGUMI	No	Neg	NA	Neg	Neg	NA	Pos	Pos	Neg	Neg	0	0	0	0	Neg	Neg	0	0	0	0	NA	0	16/07/2015	NA	NA	Yes	35	Ambiguous	Ambiguous	1454	Neg	FALSE	K	Fixed	FALSE	0	0	0	0	0	0	0	0	Neg	Neg	Neg	Neg	Neg
K317	CSR/BANGUMI	No	Neg	NA	Neg	Neg	NA	Neg	Neg	Pos	Pos	2+	0	0	2+	Pos	Pos	0	0	2+	2+	NA	0	03/08/2015	NA	NA	Yes	53	Not ambiguous	Not ambiguous	1456	Neg	FALSE	K	Fixed	FALSE	1	0	0	1	0	0	1	1	Pos	Neg	Neg	Pos	Neg
K014	CSR/BANGUMI	No	Neg	NA	Neg	Neg	NA	Neg	Neg	Pos	Pos	0	1+	1+	1+	Pos	Pos	0	1+	1+	1+	NA	0	13/06/2015	NA	NA	Yes	71	Not ambiguous	Not ambiguous	1459	Neg	FALSE	K	Fixed	FALSE	0	1	1	1	0	1	1	1	Neg	Pos	Pos	Pos	Neg
K069	CSR/BANGUMI	No	Neg	NA	Neg	Neg	NA	Neg	Neg	Neg	Neg	0	0	0	0	Pos	Pos	0	0	1+	1+	NA	0	19/06/2015	NA	NA	Yes	22	Not ambiguous	Not ambiguous	1461	Neg	FALSE	K	Fixed	FALSE	0	0	0	0	0	0	1	1	Neg	Neg	Neg	Neg	Neg
K133	CSR/BANGUMI	No	Neg	NA	Neg	Neg	NA	Neg	Neg	Neg	Neg	0	0	0	0	Pos	Pos	0	0	3+	2+	NA	0	29/06/2015	NA	NA	Yes	33	Not ambiguous	Not ambiguous	1463	Neg	FALSE	K	Fixed	FALSE	0	0	0	0	0	0	1	1	Neg	Neg	Neg	Neg	Neg
G371	HGR/BDD	No	Neg	NA	Neg	Neg	NA	Pos	Pos	Neg	Neg	0	0	0	0	Neg	Neg	0	0	0	0	NA	0	26/06/2015	NA	NA	Yes	14	Not ambiguous	Not ambiguous	1495	Neg	FALSE	G	Fixed	FALSE	0	0	0	0	0	0	0	0	Neg	Neg	Neg	Neg	Neg
G355	HGR/BDD	No	Neg	NA	Neg	Neg	NA	Neg	Neg	Pos	Pos	4+	0	0	4+	Neg	Neg	0	0	0	0	NA	0	26/06/2015	NA	NA	Yes	11	Not ambiguous	Not ambiguous	1497	Neg	FALSE	G	Fixed	FALSE	1	0	0	1	0	0	0	0	Pos	Neg	Neg	Pos	Neg
G343	HGR/BDD	No	Neg	NA	Neg	Neg	NA	Neg	Neg	Pos	Pos	0	0	4+	4+	Neg	Neg	0	0	0	0	NA	0	25/06/2015	NA	NA	Yes	25	Not ambiguous	Not ambiguous	1499	Neg	FALSE	G	Fixed	FALSE	0	0	1	1	0	0	0	0	Neg	Neg	Pos	Pos	Neg
G342	HGR/BDD	No	Neg	NA	Neg	Neg	NA	Neg	Neg	Pos	Pos	0	4+	4+	0	Neg	Neg	0	0	0	0	NA	0	25/06/2015	NA	NA	Yes	45	Not ambiguous	Not ambiguous	1501	Neg	FALSE	G	Fixed	FALSE	0	1	1	0	0	0	0	0	Neg	Pos	Pos	Neg	Neg
G331	HGR/BDD	No	Neg	NA	Neg	Neg	NA	Neg	Neg	Pos	Pos	0	0	3+	3+	Neg	Neg	0	0	0	0	NA	0	29/06/2015	NA	NA	Yes	12	Not ambiguous	Not ambiguous	1503	Neg	FALSE	G	Fixed	FALSE	0	0	1	1	0	0	0	0	Neg	Neg	Pos	Pos	Neg
G315	HGR/BDD	No	Neg	NA	Neg	Neg	NA	Neg	Neg	Pos	Pos	0	0	4+	4+	Neg	Neg	0	0	0	0	NA	0	25/06/2015	NA	NA	Yes	28	Not ambiguous	Not ambiguous	1506	Neg	FALSE	G	Fixed	FALSE	0	0	1	1	0	0	0	0	Neg	Neg	Pos	Pos	Neg
G307	HGR/BDD	No	Neg	NA	Neg	Neg	NA	Neg	Neg	Neg	Neg	0	0	0	0	Pos	Pos	0	0	4+	4+	NA	0	25/06/2015	NA	NA	Yes	38	Not ambiguous	Not ambiguous	1508	Neg	FALSE	G	Fixed	FALSE	0	0	0	0	0	0	1	1	Neg	Neg	Neg	Neg	Neg
G258	HGR/BDD	No	Neg	NA	Neg	Neg	NA	Neg	Neg	Pos	Pos	0	0	4+	4+	Neg	Neg	0	0	0	0	NA	0	23/06/2015	NA	NA	Yes	29	Not ambiguous	Not ambiguous	1512	Neg	FALSE	G	Fixed	FALSE	0	0	1	1	0	0	0	0	Neg	Neg	Pos	Pos	Neg
G248	HGR/BDD	No	Neg	NA	Neg	Neg	NA	Neg	Neg	Neg	Neg	0	0	0	0	Pos	Pos	0	0	4+	4+	NA	0	23/06/2015	NA	NA	Yes	47	Not ambiguous	Not ambiguous	1514	Neg	FALSE	G	Fixed	FALSE	0	0	0	0	0	0	1	1	Neg	Neg	Neg	Neg	Neg
G230	HGR/BDD	No	Neg	NA	Neg	Neg	NA	Pos	Pos	Neg	Neg	0	0	0	0	Neg	Neg	0	0	0	0	NA	0	23/06/2015	NA	NA	Yes	8	Not ambiguous	Not ambiguous	1516	Neg	FALSE	G	Fixed	FALSE	0	0	0	0	0	0	0	0	Neg	Neg	Neg	Neg	Neg
A1577	UM/BDD	No	Neg	NA	Neg	Neg	NA	Neg	Neg	Pos	Pos	0	0	3+	2+	Neg	Neg	0	0	0	0	NA	0	26/06/2015	NA	NA	Yes	47	Not ambiguous	Not ambiguous	1518	Neg	FALSE	A	Mobile	FALSE	0	0	1	1	0	0	0	0	Neg	Neg	Pos	Pos	Neg
G448	HGR/BDD	No	Neg	NA	Neg	Neg	NA	Neg	Neg	Pos	Pos	4+	4+	0	4+	Pos	Pos	4+	0	4+	4+	NA	0	29/06/2015	NA	NA	Yes	33	Not ambiguous	Not ambiguous	1522	Neg	FALSE	G	Fixed	FALSE	1	1	0	1	1	0	1	1	Pos	Pos	Neg	Pos	Pos
K263	CSR/BANGUMI	No	Neg	NA	Neg	Neg	NA	Neg	Neg	Neg	Neg	0	0	0	0	Pos	Pos	0	0	2+	2+	NA	0	24/07/2015	NA	NA	Yes	25	Not ambiguous	Not ambiguous	1526	Neg	FALSE	K	Fixed	FALSE	0	0	0	0	0	0	1	1	Neg	Neg	Neg	Neg	Neg
K266	CSR/BANGUMI	No	Neg	NA	Neg	Neg	NA	Neg	Neg	Neg	Neg	0	0	0	0	Pos	Pos	0	0	2+	2+	NA	0	24/07/2015	NA	NA	Yes	18	Not ambiguous	Not ambiguous	1528	Neg	FALSE	K	Fixed	FALSE	0	0	0	0	0	0	1	1	Neg	Neg	Neg	Neg	Neg
K272	CSR/BANGUMI	No	Neg	NA	Neg	Neg	NA	Neg	Neg	Neg	Neg	0	0	0	0	Pos	Pos	2+	2+	0	0	NA	0	25/07/2015	NA	NA	Yes	31	Not ambiguous	Not ambiguous	1531	Neg	FALSE	K	Fixed	FALSE	0	0	0	0	1	1	0	0	Neg	Neg	Neg	Neg	Pos
K273	CSR/BANGUMI	No	Neg	NA	Neg	Neg	NA	Neg	Neg	Neg	Neg	0	0	0	0	Pos	Pos	0	0	2+	2+	NA	0	02/07/2015	NA	NA	Yes	39	Not ambiguous	Not ambiguous	1534	Neg	FALSE	K	Fixed	FALSE	0	0	0	0	0	0	1	1	Neg	Neg	Neg	Neg	Neg
K290	CSR/BANGUMI	No	Neg	NA	Neg	Neg	NA	Neg	Neg	Neg	Neg	0	0	0	0	Pos	Pos	0	0	2+	2+	NA	0	28/07/2015	NA	NA	Yes	6	Not ambiguous	Not ambiguous	1536	Neg	FALSE	K	Fixed	FALSE	0	0	0	0	0	0	1	1	Neg	Neg	Neg	Neg	Neg
K304	CSR/BANGUMI	No	Neg	NA	Neg	Neg	NA	Neg	Neg	Neg	Neg	0	0	0	0	Pos	Pos	0	0	3+	3+	NA	0	01/08/2015	NA	NA	Yes	3	Not ambiguous	Not ambiguous	1539	Neg	FALSE	K	Fixed	FALSE	0	0	0	0	0	0	1	1	Neg	Neg	Neg	Neg	Neg
K309	CSR/BANGUMI	No	Neg	NA	Neg	Neg	NA	Neg	Neg	Pos	Pos	2+	2+	2+	2+	Pos	Pos	0	0	3+	3+	NA	0	03/08/2015	NA	NA	Yes	2	Not ambiguous	Not ambiguous	1541	Neg	FALSE	K	Fixed	FALSE	1	1	1	1	0	0	1	1	Pos	Pos	Pos	Pos	Neg
K313	CSR/BANGUMI	No	Neg	NA	Neg	Neg	NA	Neg	Neg	Pos	Pos	0	0	3+	3+	Pos	Pos	0	0	3+	3+	NA	0	03/08/2015	NA	NA	Yes	30	Not ambiguous	Not ambiguous	1544	Neg	FALSE	K	Fixed	FALSE	0	0	1	1	0	0	1	1	Neg	Neg	Pos	Pos	Neg
K314	CSR/BANGUMI	No	Neg	NA	Neg	Neg	NA	Pos	Pos	Pos	Pos	2+	2+	2+	2+	Pos	Pos	2+	2+	2+	2+	NA	0	03/08/2015	NA	NA	Yes	30	Ambiguous	Ambiguous	1546	Neg	FALSE	K	Fixed	FALSE	1	1	1	1	1	1	1	1	Pos	Pos	Pos	Pos	Pos
A365	UM/BDD	No	Neg	NA	Neg	Neg	Neg	Neg	Neg	Pos	Pos	2+	2+	4+	1+	Neg	Neg	0	0	0	0	NA	0	17/06/2015	NA	NA	Yes	10	Not ambiguous	Not ambiguous	1548	Neg	FALSE	A	Mobile	FALSE	1	1	1	1	0	0	0	0	Pos	Pos	Pos	Pos	Neg
A318	UM/BDD	No	Neg	NA	Neg	Neg	NA	Neg	Neg	Pos	Pos	4+	4+	1+	1+	Neg	Neg	0	0	0	0	NA	0	17/06/2015	NA	NA	Yes	14	Not ambiguous	Not ambiguous	1551	Neg	FALSE	A	Mobile	FALSE	1	1	1	1	0	0	0	0	Pos	Pos	Pos	Pos	Neg
A345	UM BANDUNDU	No	Neg	NA	Neg	Neg	Neg	Pos	Pos	Neg	Neg	0	0	0	0	Neg	Neg	0	0	0	0	NA	0	17/06/2015	NA	NA	Yes	7	Not ambiguous	Not ambiguous	1554	Neg	FALSE	A	Mobile	FALSE	0	0	0	0	0	0	0	0	Neg	Neg	Neg	Neg	Neg
A367	UM/BDD	No	Neg	NA	Neg	Neg	Neg	Pos	Pos	Neg	Neg	0	0	0	0	Neg	Neg	0	0	0	0	NA	0	17/06/2015	NA	NA	Yes	10	Not ambiguous	Not ambiguous	1557	Neg	FALSE	A	Mobile	FALSE	0	0	0	0	0	0	0	0	Neg	Neg	Neg	Neg	Neg
G149	HGR/BDD	No	Neg	NA	Neg	Neg	NA	Neg	Neg	Pos	Pos	0	0	3+	3+	Neg	Neg	0	0	0	0	NA	0	19/06/2015	NA	NA	Yes	45	Not ambiguous	Not ambiguous	1559	Neg	FALSE	G	Fixed	FALSE	0	0	1	1	0	0	0	0	Neg	Neg	Pos	Pos	Neg
G161	HGR/BDD	No	Neg	NA	Neg	Neg	NA	Neg	Neg	Neg	Neg	0	0	0	0	Pos	Pos	4+	4+	0	0	NA	0	20/06/2015	NA	NA	Yes	62	Not ambiguous	Not ambiguous	1562	Neg	FALSE	G	Fixed	FALSE	0	0	0	0	1	1	0	0	Neg	Neg	Neg	Neg	Pos
G181	HGR/BDD	No	Neg	NA	Neg	Neg	NA	Neg	Neg	Pos	Pos	0	0	1+	1+	Neg	Neg	0	0	0	0	NA	0	20/06/2015	NA	NA	Yes	18	Not ambiguous	Not ambiguous	1564	Neg	FALSE	G	Fixed	FALSE	0	0	1	1	0	0	0	0	Neg	Neg	Pos	Pos	Neg
G180	HGR/BDD	No	Neg	NA	Neg	Neg	NA	Neg	Neg	Neg	Neg	0	0	0	0	Pos	Pos	0	0	1+	1+	NA	0	20/06/2015	NA	NA	Yes	15	Not ambiguous	Not ambiguous	1567	Neg	FALSE	G	Fixed	FALSE	0	0	0	0	0	0	1	1	Neg	Neg	Neg	Neg	Neg
G382	HGR/BDD	No	Neg	NA	Neg	Neg	NA	Neg	Neg	Pos	Pos	4+	4+	0	0	Neg	Neg	0	0	0	0	NA	0	27/06/2015	NA	NA	Yes	19	Not ambiguous	Not ambiguous	1569	Neg	FALSE	G	Fixed	FALSE	1	1	0	0	0	0	0	0	Pos	Pos	Neg	Neg	Neg
G401	HGR/BDD	No	Neg	NA	Neg	Neg	NA	Neg	Neg	Pos	Pos	2+	2+	0	0	Pos	Pos	2+	2+	0	0	NA	0	27/06/2015	NA	NA	Yes	73	Not ambiguous	Not ambiguous	1571	Neg	FALSE	G	Fixed	FALSE	1	1	0	0	1	1	0	0	Pos	Pos	Neg	Neg	Pos
A393	UM/BANDUNDU	No	Neg	NA	Neg	Neg	NA	Neg	Neg	Pos	Pos	2+	1+	0	0	Neg	Neg	0	0	0	0	NA	0	17/06/2015	NA	NA	Yes	11	Not ambiguous	Not ambiguous	1573	Neg	FALSE	A	Mobile	FALSE	1	1	0	0	0	0	0	0	Pos	Pos	Neg	Neg	Neg
A394	UM/BDD	No	Neg	NA	Neg	Neg	Neg	Neg	Neg	Neg	Neg	0	0	0	0	Pos	Neg	0	0	2+	0	NA	0	17/06/2015	NA	NA	Yes	7	Not ambiguous	Not ambiguous	1575	Neg	FALSE	A	Mobile	FALSE	0	0	0	0	0	0	1	0	Neg	Neg	Neg	Neg	Neg
A363	UM/BDD	No	Neg	NA	Neg	Neg	NA	Neg	Neg	Neg	Neg	0	0	0	0	Pos	Pos	0	0	2+	1+	NA	0	17/06/2015	NA	NA	Yes	13	Not ambiguous	Not ambiguous	1578	Neg	FALSE	A	Mobile	FALSE	0	0	0	0	0	0	1	1	Neg	Neg	Neg	Neg	Neg
A1167	UM/BDD	No	Neg	NA	Neg	Neg	NA	Neg	Neg	Neg	Pos	0	4+	0	0	Neg	Neg	0	0	0	0	NA	0	22/06/2015	NA	NA	Yes	53	Not ambiguous	Not ambiguous	1580	Neg	FALSE	A	Mobile	FALSE	0	1	0	0	0	0	0	0	Neg	Pos	Neg	Neg	Neg
A1071	UM/BDD	No	Neg	NA	Neg	Neg	NA	Pos	Pos	Pos	Pos	2+	2+	0	0	Neg	Neg	0	0	0	0	NA	0	21/06/2015	NA	NA	Yes	7	Not ambiguous	Not ambiguous	1583	Neg	FALSE	A	Mobile	FALSE	1	1	0	0	0	0	0	0	Pos	Pos	Neg	Neg	Neg
A951	UM/BDD	No	Neg	NA	Neg	Neg	NA	Neg	Neg	Neg	Neg	0	0	0	0	Pos	Pos	2+	2+	0	0	NA	0	21/06/2015	NA	NA	Yes	78	Not ambiguous	Not ambiguous	1585	Neg	FALSE	A	Mobile	FALSE	0	0	0	0	1	1	0	0	Neg	Neg	Neg	Neg	Pos
A863	UM/BDD	No	Neg	NA	Neg	Neg	NA	Neg	Neg	Neg	Pos	0	4+	0	0	Neg	Neg	0	0	0	0	NA	0	21/06/2015	NA	NA	Yes	10	Not ambiguous	Not ambiguous	1589	Neg	FALSE	A	Mobile	FALSE	0	1	0	0	0	0	0	0	Neg	Pos	Neg	Neg	Neg
A854	UM/BDD	No	Neg	NA	Neg	Neg	NA	Neg	Neg	Neg	Neg	0	0	0	0	Pos	Neg	0	0	1+	0	NA	0	21/06/2015	NA	NA	Yes	11	Not ambiguous	Not ambiguous	1591	Neg	FALSE	A	Mobile	FALSE	0	0	0	0	0	0	1	0	Neg	Neg	Neg	Neg	Neg
A832	UM/BDD	No	Neg	NA	Neg	Neg	NA	Neg	Neg	Neg	Pos	0	1+	0	0	Neg	Neg	0	0	0	0	NA	0	20/06/2015	NA	NA	Yes	13	Not ambiguous	Not ambiguous	1593	Neg	FALSE	A	Mobile	FALSE	0	1	0	0	0	0	0	0	Neg	Pos	Neg	Neg	Neg
A1366	UM/BDD	No	Neg	NA	Neg	Neg	NA	Neg	Neg	Neg	Neg	0	0	0	0	Pos	Pos	2+	3+	0	0	NA	0	24/06/2015	NA	NA	Yes	23	Not ambiguous	Not ambiguous	1611	Neg	FALSE	A	Mobile	FALSE	0	0	0	0	1	1	0	0	Neg	Neg	Neg	Neg	Pos
A1347	UM/BDD	No	Neg	NA	Neg	Neg	NA	Neg	Neg	Neg	Neg	0	0	0	0	Pos	Pos	3+	3+	0	0	NA	0	24/06/2015	NA	NA	Yes	13	Not ambiguous	Not ambiguous	1617	Neg	FALSE	A	Mobile	FALSE	0	0	0	0	1	1	0	0	Neg	Neg	Neg	Neg	Pos
A1336	UM/BDD	No	Neg	NA	Neg	Neg	NA	Neg	Neg	Neg	Neg	0	0	0	0	Pos	Pos	4+	4+	0	0	NA	0	24/06/2015	NA	NA	Yes	20	Not ambiguous	Not ambiguous	1620	Neg	FALSE	A	Mobile	FALSE	0	0	0	0	1	1	0	0	Neg	Neg	Neg	Neg	Pos
A1176	UM/BDD	No	Neg	NA	Neg	Neg	NA	Neg	Neg	Neg	Neg	0	0	0	0	Pos	Pos	4+	4+	0	0	NA	0	22/06/2015	NA	NA	Yes	34	Not ambiguous	Not ambiguous	1625	Neg	FALSE	A	Mobile	FALSE	0	0	0	0	1	1	0	0	Neg	Neg	Neg	Neg	Pos
K316	CSR/BANGUMI	No	Neg	NA	Neg	Neg	NA	Neg	Neg	Neg	Neg	0	0	0	0	Pos	Pos	2+	2+	0	0	NA	0	03/08/2015	NA	NA	Yes	71	Not ambiguous	Not ambiguous	1628	Neg	FALSE	K	Fixed	FALSE	0	0	0	0	1	1	0	0	Neg	Neg	Neg	Neg	Pos
K321	CSR/BANGUMI	No	Neg	NA	Neg	Neg	NA	Neg	Neg	Neg	Neg	0	0	0	0	Pos	Pos	0	0	2+	2+	NA	0	03/08/2015	NA	NA	Yes	58	Not ambiguous	Not ambiguous	1630	Neg	FALSE	K	Fixed	FALSE	0	0	0	0	0	0	1	1	Neg	Neg	Neg	Neg	Neg
A776	UM/BDD	No	Neg	NA	Neg	Neg	NA	Pos	Pos	Pos	Pos	1+	1+	0	0	Neg	Neg	0	0	0	0	NA	0	20/06/2015	25	NA	Yes	69	Not ambiguous	Not ambiguous	1634	Neg	FALSE	A	Mobile	FALSE	1	1	0	0	0	0	0	0	Pos	Pos	Neg	Neg	Neg
A992	UM/BDD	No	Neg	NA	Neg	Neg	NA	Neg	Neg	Pos	Neg	0	0	2+	0	Neg	Neg	0	0	0	0	NA	0	21/06/2015	NA	NA	Yes	34	Not ambiguous	Not ambiguous	1636	Neg	FALSE	A	Mobile	FALSE	0	0	1	0	0	0	0	0	Neg	Neg	Pos	Neg	Neg
A1022	UM/BDD	No	Neg	NA	Neg	Neg	NA	Neg	Neg	Neg	Neg	0	0	0	0	Pos	Pos	2+	3+	0	1+	NA	0	21/06/2015	NA	NA	Yes	15	Not ambiguous	Not ambiguous	1638	Neg	FALSE	A	Mobile	FALSE	0	0	0	0	1	1	0	1	Neg	Neg	Neg	Neg	Pos
A1026	UM/BDD	No	Neg	NA	Neg	Neg	NA	Neg	Neg	Neg	Neg	0	0	0	0	Pos	Pos	3+	2+	2+	1+	NA	0	21/06/2015	NA	NA	Yes	36	Not ambiguous	Not ambiguous	1641	Neg	FALSE	A	Mobile	FALSE	0	0	0	0	1	1	1	1	Neg	Neg	Neg	Neg	Pos
A1516	UM/BDD	No	Neg	NA	Neg	Neg	NA	Neg	Neg	Neg	Neg	0	0	0	0	Pos	Pos	2+	2+	0	0	NA	0	25/06/2015	NA	NA	Yes	5	Not ambiguous	Not ambiguous	1643	Neg	FALSE	A	Mobile	FALSE	0	0	0	0	1	1	0	0	Neg	Neg	Neg	Neg	Pos
A1428	UM/BDD	No	Neg	NA	Neg	Neg	NA	Neg	Neg	Neg	Neg	0	0	0	0	Pos	Pos	0	4+	3+	2+	NA	0	25/06/2015	NA	NA	Yes	64	Not ambiguous	Not ambiguous	1645	Neg	FALSE	A	Mobile	FALSE	0	0	0	0	0	1	1	1	Neg	Neg	Neg	Neg	Neg
A1392	UM/BDD	No	Neg	NA	Neg	Neg	NA	Neg	Neg	Neg	Pos	0	2+	0	0	Neg	Neg	0	0	0	0	NA	0	25/06/2015	NA	NA	Yes	5	Not ambiguous	Not ambiguous	1647	Neg	FALSE	A	Mobile	FALSE	0	1	0	0	0	0	0	0	Neg	Pos	Neg	Neg	Neg
A1382	UM/BDD	No	Neg	NA	Neg	Neg	NA	Pos	Pos	Neg	Neg	0	0	0	0	Pos	Pos	4+	2+	0	0	NA	0	25/06/2015	NA	NA	Yes	8	Not ambiguous	Not ambiguous	1649	Neg	FALSE	A	Mobile	FALSE	0	0	0	0	1	1	0	0	Neg	Neg	Neg	Neg	Pos
A988	UM/BDD	No	Neg	NA	Neg	Neg	NA	Neg	Neg	Neg	Neg	0	0	0	0	Pos	Pos	0	0	2+	3+	NA	0	21/06/2015	NA	NA	Yes	13	Not ambiguous	Not ambiguous	1651	Neg	FALSE	A	Mobile	FALSE	0	0	0	0	0	0	1	1	Neg	Neg	Neg	Neg	Neg
A967	UM/BDD	No	Neg	NA	Neg	Neg	NA	Neg	Neg	Neg	Neg	0	0	0	0	Pos	Pos	2+	2+	1+	1+	NA	0	21/06/2015	NA	NA	Yes	15	Not ambiguous	Not ambiguous	1653	Neg	FALSE	A	Mobile	FALSE	0	0	0	0	1	1	1	1	Neg	Neg	Neg	Neg	Pos
A962	UM/BDD	No	Neg	NA	Neg	Neg	NA	Neg	Neg	Pos	Pos	1+	1+	3+	1+	Neg	Neg	0	0	0	0	NA	0	21/06/2015	25	NA	Yes	2	Not ambiguous	Not ambiguous	1656	Neg	FALSE	A	Mobile	FALSE	1	1	1	1	0	0	0	0	Pos	Pos	Pos	Pos	Neg
A941	UM/BDD	No	Neg	NA	Neg	Neg	NA	Neg	Neg	Neg	Neg	0	0	0	0	Pos	Pos	2+	2+	0	0	NA	0	21/06/2015	NA	NA	Yes	6	Not ambiguous	Not ambiguous	1661	Neg	FALSE	A	Mobile	FALSE	0	0	0	0	1	1	0	0	Neg	Neg	Neg	Neg	Pos
A936	UM/BDD	No	Neg	NA	Neg	Neg	NA	Neg	Neg	Pos	Neg	2+	0	2+	0	Neg	Neg	0	0	0	0	NA	0	21/06/2015	NA	NA	Yes	14	Not ambiguous	Not ambiguous	1663	Neg	FALSE	A	Mobile	FALSE	1	0	1	0	0	0	0	0	Pos	Neg	Pos	Neg	Neg
A909	UM/BDD	No	Neg	NA	Neg	Neg	NA	Neg	Neg	Neg	Neg	0	0	0	0	Pos	Neg	2+	0	0	0	NA	0	21/06/2015	NA	NA	Yes	13	Not ambiguous	Not ambiguous	1665	Neg	FALSE	A	Mobile	FALSE	0	0	0	0	1	0	0	0	Neg	Neg	Neg	Neg	Pos
A901	UM/BDD	No	Neg	NA	Neg	Neg	Neg	Neg	Neg	Pos	Pos	2+	2+	0	0	Neg	Neg	0	0	0	0	NA	0	21/06/2015	NA	NA	Yes	10	Not ambiguous	Not ambiguous	1667	Neg	FALSE	A	Mobile	FALSE	1	1	0	0	0	0	0	0	Pos	Pos	Neg	Neg	Neg
A891	UM/BDD	No	Neg	NA	Neg	Neg	NA	Pos	Pos	Neg	Neg	0	0	0	0	Pos	Neg	2+	0	0	0	NA	0	20/06/2015	NA	NA	Yes	49	Not ambiguous	Not ambiguous	1669	Neg	FALSE	A	Mobile	FALSE	0	0	0	0	1	0	0	0	Neg	Neg	Neg	Neg	Pos
A826	UM/BDD	No	Neg	NA	Neg	Neg	NA	Neg	Neg	Neg	Pos	0	1+	0	0	Neg	Neg	0	0	0	0	NA	0	20/06/2015	NA	NA	Yes	6	Not ambiguous	Not ambiguous	1672	Neg	FALSE	A	Mobile	FALSE	0	1	0	0	0	0	0	0	Neg	Pos	Neg	Neg	Neg
A814	UM/BDD	No	Neg	NA	Neg	Neg	NA	Neg	Neg	Neg	Neg	0	0	0	0	Pos	Pos	0	0	2+	2+	NA	0	20/06/2015	NA	NA	Yes	1	Not ambiguous	Not ambiguous	1674	Neg	FALSE	A	Mobile	FALSE	0	0	0	0	0	0	1	1	Neg	Neg	Neg	Neg	Neg
A811	UM/BDD	No	Neg	NA	Neg	Neg	Neg	Neg	Neg	Neg	Pos	0	1+	0	0	Pos	Pos	2+	2+	0	0	NA	0	20/06/2015	NA	NA	Yes	11	Not ambiguous	Not ambiguous	1677	Neg	FALSE	A	Mobile	FALSE	0	1	0	0	1	1	0	0	Neg	Pos	Neg	Neg	Pos
A732	UM/BDD	No	Neg	NA	Neg	Neg	NA	Neg	Neg	Pos	Pos	3+	3+	3+	3+	Pos	Pos	3+	3+	3+	3+	NA	0	19/06/2015	NA	NA	Yes	35	Not ambiguous	Not ambiguous	1679	Neg	FALSE	A	Mobile	FALSE	1	1	1	1	1	1	1	1	Pos	Pos	Pos	Pos	Pos
A677	UM/BDD	No	Neg	NA	Neg	Neg	NA	Neg	Neg	Neg	Neg	0	0	0	0	Pos	Neg	0	0	3+	0	NA	0	19/06/2015	NA	NA	Yes	13	Not ambiguous	Not ambiguous	1682	Neg	FALSE	A	Mobile	FALSE	0	0	0	0	0	0	1	0	Neg	Neg	Neg	Neg	Neg
A1034	UM/BDD	No	Neg	NA	Neg	Neg	Neg	Neg	Neg	Neg	Pos	0	1+	0	1+	Neg	Neg	0	0	0	0	NA	0	21/06/2015	NA	NA	Yes	8	Not ambiguous	Not ambiguous	1684	Neg	FALSE	A	Mobile	FALSE	0	1	0	1	0	0	0	0	Neg	Pos	Neg	Pos	Neg
C00742	UM/MUSHIE	No	Neg	NA	Neg	Neg	NA	Neg	Neg	Neg	Neg	0	0	0	0	Pos	Pos	0	0	1+	1+	NA	0	02/06/2015	NA	NA	Yes	30	Not ambiguous	Not ambiguous	2436	Neg	FALSE	C	Mobile	FALSE	0	0	0	0	0	0	1	1	Neg	Neg	Neg	Neg	Neg
E3318	IDIOFA	No	Neg	NA	Neg	Neg	NA	Pos	Pos	Neg	Neg	0	0	0	0	Pos	Pos	1+	1+	0	0	NA	0	22/06/2015	NA	NA	Yes	32	Not ambiguous	Not ambiguous	2437	Neg	FALSE	E	Mobile	FALSE	0	0	0	0	1	1	0	0	Neg	Neg	Neg	Neg	Pos
P365	HGR/MASIMANIMBA	No	Neg	NA	Neg	Neg	NA	Pos	Pos	Pos	Pos	1+	1+	2+	2+	Pos	Pos	2+	2+	0	0	NA	0	10/07/2015	1	NA	Yes	13	Not ambiguous	Not ambiguous	2438	Neg	FALSE	P	Fixed	FALSE	1	1	1	1	1	1	0	0	Pos	Pos	Pos	Pos	Pos
J005	HGR/BAGATA	No	NA	Neg	NA	NA	Pos	Pos	Pos	Pos	Pos	2+	2+	3+	3+	Pos	Pos	3+	3+	0	0	NA	0	19/06/2015	NA	3	Yes	36	Not ambiguous	Not ambiguous	2440	Pos	TRUE	J	Fixed	FALSE	1	1	1	1	1	1	0	0	Pos	Pos	Pos	Pos	Pos
A1484	UM/BDD	No	Neg	Neg	Neg	Neg	Neg	Neg	Neg	Neg	Neg	0	0	0	0	Pos	Pos	4+	4+	0	0	NA	0	25/06/2015	NA	2	Yes	51	Not ambiguous	Not ambiguous	2441	Neg	FALSE	A	Mobile	FALSE	0	0	0	0	1	1	0	0	Neg	Neg	Neg	Neg	Pos
M237	HS DE KITOY	No	Neg	NA	Neg	Neg	NA	Neg	Neg	Neg	Neg	0	0	0	0	Pos	Pos	1+	1+	1+	1+	NA	0	07/07/2015	NA	NA	Yes	60	Not ambiguous	Not ambiguous	2442	Neg	FALSE	M	Fixed	FALSE	0	0	0	0	1	1	1	1	Neg	Neg	Neg	Neg	Pos
M185	HS DE KITOY	No	Neg	NA	Neg	Neg	NA	Neg	Neg	Pos	Pos	1+	1+	1+	1+	Neg	Neg	0	0	0	0	NA	0	27/06/2015	11	NA	Yes	33	Not ambiguous	Not ambiguous	2443	Neg	FALSE	M	Fixed	FALSE	1	1	1	1	0	0	0	0	Pos	Pos	Pos	Pos	Neg
M213	HS DE KITOY	No	Neg	NA	Neg	Neg	NA	Neg	Neg	Neg	Neg	0	0	0	0	Pos	Pos	1+	1+	1+	1+	NA	0	01/07/2015	NA	NA	Yes	6	Not ambiguous	Not ambiguous	2445	Neg	FALSE	M	Fixed	FALSE	0	0	0	0	1	1	1	1	Neg	Neg	Neg	Neg	Pos
M195	HS DE KITOY	No	Neg	NA	Neg	Neg	NA	Neg	Neg	Neg	Pos	0	1+	0	1+	Neg	Neg	0	0	0	0	NA	0	29/06/2015	NA	NA	Yes	23	Not ambiguous	Not ambiguous	2446	Neg	FALSE	M	Fixed	FALSE	0	1	0	1	0	0	0	0	Neg	Pos	Neg	Pos	Neg
M171	HS DE KITOY	No	Neg	NA	Neg	Neg	NA	Neg	Neg	Neg	Neg	0	0	0	0	Pos	Pos	1+	2+	1+	2+	NA	0	27/06/2015	NA	NA	Yes	36	Not ambiguous	Not ambiguous	2447	Neg	FALSE	M	Fixed	FALSE	0	0	0	0	1	1	1	1	Neg	Neg	Neg	Neg	Pos
M167	HS DE KITOY	No	Neg	NA	Neg	Neg	NA	Neg	Neg	Neg	Neg	0	0	0	0	Pos	Pos	1+	1+	1+	1+	NA	0	27/06/2015	NA	NA	Yes	18	Ambiguous	Ambiguous	2448	Neg	FALSE	M	Fixed	FALSE	0	0	0	0	1	1	1	1	Neg	Neg	Neg	Neg	Pos
M163	HS DE KITOY	No	Neg	NA	Neg	Neg	NA	Neg	Neg	Neg	Neg	0	0	0	0	Pos	Pos	2+	2+	2+	2+	NA	0	27/06/2015	NA	NA	Yes	23	Not ambiguous	Not ambiguous	2449	Neg	FALSE	M	Fixed	FALSE	0	0	0	0	1	1	1	1	Neg	Neg	Neg	Neg	Pos
M158	HS DE KITOY	No	Neg	NA	Neg	Neg	NA	Neg	Neg	Pos	Pos	1+	1+	1+	1+	Pos	Pos	1+	1+	1+	1+	NA	0	26/06/2015	11	NA	Yes	9	Not ambiguous	Not ambiguous	2450	Neg	FALSE	M	Fixed	FALSE	1	1	1	1	1	1	1	1	Pos	Pos	Pos	Pos	Pos
P371	HGR/MASIMANIMBA	No	Neg	NA	Neg	Neg	Neg	Pos	Pos	Neg	Neg	0	0	0	0	Neg	Neg	0	0	0	0	NA	0	13/07/2015	NA	NA	Yes	15	Ambiguous	Ambiguous	2451	Neg	FALSE	P	Fixed	FALSE	0	0	0	0	0	0	0	0	Neg	Neg	Neg	Neg	Neg
P372	HGR-MASIMANIMBA	No	Neg	NA	Neg	Neg	NA	Neg	Pos	Neg	Neg	0	0	0	0	Pos	Pos	0	0	1+	1+	NA	0	13/07/2015	NA	NA	Yes	25	Not ambiguous	Not ambiguous	2452	Neg	FALSE	P	Fixed	FALSE	0	0	0	0	0	0	1	1	Neg	Neg	Neg	Neg	Neg
P375	HGR/MASIMANIMBA	No	Neg	NA	Neg	Neg	NA	Pos	Pos	Neg	Neg	0	0	0	0	Pos	Pos	0	0	3+	3+	NA	0	13/07/2015	NA	NA	Yes	25	Ambiguous	Ambiguous	2453	Neg	FALSE	P	Fixed	FALSE	0	0	0	0	0	0	1	1	Neg	Neg	Neg	Neg	Neg
P381	HGR/MASIMANIMBA	No	Neg	NA	Neg	Neg	NA	Neg	Neg	Neg	Neg	0	0	0	0	Pos	Pos	1+	1+	2+	2+	NA	0	13/07/2015	NA	NA	Yes	18	Not ambiguous	Not ambiguous	2454	Neg	FALSE	P	Fixed	FALSE	0	0	0	0	1	1	1	1	Neg	Neg	Neg	Neg	Pos
P382	HGR MASIMANIMBA	No	Neg	NA	Neg	Neg	NA	Pos	Pos	Neg	Neg	0	0	0	0	Neg	Neg	0	0	0	0	NA	0	13/07/2015	NA	NA	Yes	29	Not ambiguous	Not ambiguous	2455	Neg	FALSE	P	Fixed	FALSE	0	0	0	0	0	0	0	0	Neg	Neg	Neg	Neg	Neg
P387	HGR/MASIMANIMBA	No	Neg	NA	Neg	Neg	NA	Neg	Neg	Neg	Neg	0	0	0	0	Pos	Pos	2+	2+	2+	2+	NA	0	13/07/2015	NA	NA	Yes	42	Not ambiguous	Not ambiguous	2456	Neg	FALSE	P	Fixed	FALSE	0	0	0	0	1	1	1	1	Neg	Neg	Neg	Neg	Pos
P386	HGR/MASIMANIMBA	No	Neg	NA	Neg	Neg	NA	Pos	Pos	Neg	Neg	0	0	0	0	Pos	Pos	0	0	2+	2+	NA	0	13/07/2015	NA	NA	Yes	37	Not ambiguous	Ambiguous	2457	Neg	FALSE	P	Fixed	FALSE	0	0	0	0	0	0	1	1	Neg	Neg	Neg	Neg	Neg
P388	HGR/MASIMANIMBA	No	Neg	NA	Neg	Neg	NA	Neg	Neg	Neg	Neg	0	0	0	0	Pos	Pos	1+	1+	2+	2+	NA	0	13/07/2015	NA	NA	Yes	33	Not ambiguous	Not ambiguous	2458	Neg	FALSE	P	Fixed	FALSE	0	0	0	0	1	1	1	1	Neg	Neg	Neg	Neg	Pos
P390	HGR/MASIMANIMBA	No	Neg	NA	Neg	Neg	NA	Neg	Neg	Neg	Neg	0	0	0	0	Pos	Pos	0	0	4+	4+	NA	0	13/07/2015	NA	NA	Yes	46	Not ambiguous	Not ambiguous	2459	Neg	FALSE	P	Fixed	FALSE	0	0	0	0	0	0	1	1	Neg	Neg	Neg	Neg	Neg
P403	HGR/MASIMANIMBA	No	Neg	NA	Neg	Neg	NA	Pos	Pos	Pos	Pos	3+	3+	2+	2+	Neg	Neg	0	0	0	0	NA	0	14/07/2015	NA	NA	Yes	30	Ambiguous	Ambiguous	2460	Neg	FALSE	P	Fixed	FALSE	1	1	1	1	0	0	0	0	Pos	Pos	Pos	Pos	Neg
M219	HS DE KITOY	No	Neg	NA	Neg	Neg	NA	Neg	Neg	Pos	Pos	1+	1+	1+	1+	Neg	Neg	0	0	0	0	NA	0	01/07/2015	12	NA	Yes	27	Not ambiguous	Not ambiguous	2461	Neg	FALSE	M	Fixed	FALSE	1	1	1	1	0	0	0	0	Pos	Pos	Pos	Pos	Neg
P471	HGR/MASIMANIMBA	No	Neg	NA	Neg	Neg	NA	Neg	Neg	Neg	Neg	0	0	0	0	Pos	Pos	0	2+	2+	0	NA	0	24/07/2015	NA	NA	Yes	37	Not ambiguous	Not ambiguous	2462	Neg	FALSE	P	Fixed	FALSE	0	0	0	0	0	1	1	0	Neg	Neg	Neg	Neg	Neg
P461	HGR/MASIMANIMBA	No	Neg	NA	Neg	Neg	NA	Neg	Neg	Neg	Neg	0	0	0	0	Pos	Pos	3+	3+	3+	3+	NA	0	23/07/2015	NA	NA	Yes	59	Not ambiguous	Not ambiguous	2463	Neg	FALSE	P	Fixed	FALSE	0	0	0	0	1	1	1	1	Neg	Neg	Neg	Neg	Pos
P458	HGR/MASIMANIMBA	No	Neg	NA	Neg	Neg	NA	Neg	Neg	Neg	Neg	0	0	0	0	Neg	Neg	0	0	0	0	NA	0	22/07/2015	NA	NA	Yes	62	Not ambiguous	Not ambiguous	2464	Neg	FALSE	P	Fixed	FALSE	0	0	0	0	0	0	0	0	Neg	Neg	Neg	Neg	Neg
P453	HGR/MASIMANIMBA	No	Neg	NA	Neg	Neg	NA	Neg	Neg	Neg	Neg	0	0	0	0	Neg	Neg	0	0	0	0	NA	0	22/07/2015	NA	NA	Yes	36	Not ambiguous	Not ambiguous	2465	Neg	FALSE	P	Fixed	FALSE	0	0	0	0	0	0	0	0	Neg	Neg	Neg	Neg	Neg
P451	HGR/MASIMANIMBA	No	Neg	NA	Neg	Neg	NA	Pos	Pos	Neg	Neg	0	0	0	0	Pos	Pos	2+	2+	0	0	NA	0	22/07/2015	NA	NA	Yes	40	Not ambiguous	Not ambiguous	2466	Neg	FALSE	P	Fixed	FALSE	0	0	0	0	1	1	0	0	Neg	Neg	Neg	Neg	Pos
P425	HGR/MASIMANIMBA	No	Neg	NA	Neg	Neg	NA	Pos	Pos	Neg	Neg	0	0	0	0	Pos	Pos	1+	1+	2+	1+	NA	0	18/07/2015	NA	NA	Yes	15	Not ambiguous	Not ambiguous	2467	Neg	FALSE	P	Fixed	FALSE	0	0	0	0	1	1	1	1	Neg	Neg	Neg	Neg	Pos
P424	HGR/MASIMANIMBA	No	Neg	NA	Neg	Neg	NA	Pos	Pos	Neg	Neg	0	0	0	0	Pos	Pos	0	0	4+	4+	NA	0	17/07/2015	NA	NA	Yes	20	Ambiguous	Ambiguous	2468	Neg	FALSE	P	Fixed	FALSE	0	0	0	0	0	0	1	1	Neg	Neg	Neg	Neg	Neg
P406	HGR/MASIMANIMBA	No	Neg	NA	Neg	Neg	NA	Neg	Neg	Neg	Neg	0	0	0	0	Neg	Neg	0	0	0	0	NA	0	14/07/2015	NA	NA	Yes	68	Not ambiguous	Not ambiguous	2469	Neg	FALSE	P	Fixed	FALSE	0	0	0	0	0	0	0	0	Neg	Neg	Neg	Neg	Neg
P405	HGR/MASIMANIMBA	No	Neg	NA	Neg	Neg	NA	Pos	Pos	Neg	Neg	0	0	0	0	Pos	Pos	0	0	2+	2+	NA	0	14/07/2015	NA	NA	Yes	18	Ambiguous	Ambiguous	2470	Neg	FALSE	P	Fixed	FALSE	0	0	0	0	0	0	1	1	Neg	Neg	Neg	Neg	Neg
P473	HGR/MASIMANIMBA	No	Neg	NA	Neg	Neg	NA	Neg	Neg	Neg	Neg	0	0	0	0	Pos	Pos	0	0	1+	1+	NA	0	24/07/2015	NA	NA	Yes	37	Not ambiguous	Not ambiguous	2471	Neg	FALSE	P	Fixed	FALSE	0	0	0	0	0	0	1	1	Neg	Neg	Neg	Neg	Neg
M262	HS DE KITOY	No	Neg	NA	Neg	Neg	NA	Neg	Neg	Neg	Neg	0	0	0	0	Neg	Neg	0	0	0	0	NA	0	13/07/2015	NA	NA	Yes	18	Not ambiguous	Not ambiguous	2472	Neg	FALSE	M	Fixed	FALSE	0	0	0	0	0	0	0	0	Neg	Neg	Neg	Neg	Neg
M268	HS DE KITOY	No	Neg	NA	Neg	Neg	NA	Neg	Neg	Pos	Pos	2+	2+	2+	2+	Pos	Pos	2+	2+	2+	2+	NA	0	15/07/2015	NA	NA	Yes	28	Ambiguous	Not ambiguous	2473	Neg	FALSE	M	Fixed	FALSE	1	1	1	1	1	1	1	1	Pos	Pos	Pos	Pos	Pos
M269	HS DE KITOY	No	Neg	NA	Neg	Neg	NA	Neg	Neg	Neg	Neg	0	0	0	0	Pos	Pos	1+	1+	1+	1+	NA	0	15/07/2015	NA	NA	Yes	12	Not ambiguous	Not ambiguous	2474	Neg	FALSE	M	Fixed	FALSE	0	0	0	0	1	1	1	1	Neg	Neg	Neg	Neg	Pos
M277	HS DE KITOY	No	Neg	NA	Neg	Neg	NA	Neg	Neg	Neg	Neg	0	0	0	0	Pos	Pos	2+	2+	1+	1+	NA	0	15/07/2015	NA	NA	Yes	31	Not ambiguous	Not ambiguous	2475	Neg	FALSE	M	Fixed	FALSE	0	0	0	0	1	1	1	1	Neg	Neg	Neg	Neg	Pos
M287	HS DE KITOY	No	Neg	NA	Neg	Neg	NA	Pos	Pos	Neg	Neg	0	0	0	0	Neg	Neg	0	0	0	0	NA	0	17/07/2015	NA	NA	Yes	19	Ambiguous	Ambiguous	2476	Neg	FALSE	M	Fixed	FALSE	0	0	0	0	0	0	0	0	Neg	Neg	Neg	Neg	Neg
M288	HS DE KITOY	No	Neg	NA	Neg	Neg	NA	Neg	Neg	Neg	Neg	0	0	0	0	Pos	Pos	1+	1+	1+	1+	NA	0	17/07/2015	NA	NA	Yes	23	Not ambiguous	Not ambiguous	2477	Neg	FALSE	M	Fixed	FALSE	0	0	0	0	1	1	1	1	Neg	Neg	Neg	Neg	Pos
M309	HS DE KITOY	No	Neg	NA	Neg	Neg	NA	Neg	Neg	Neg	Neg	0	0	0	0	Pos	Pos	1+	1+	1+	1+	NA	0	18/07/2015	NA	NA	Yes	8	Not ambiguous	Not ambiguous	2478	Neg	FALSE	M	Fixed	FALSE	0	0	0	0	1	1	1	1	Neg	Neg	Neg	Neg	Pos
M310	HS DE KITOY	No	Neg	NA	Neg	Neg	NA	Neg	Neg	Pos	Pos	2+	2+	2+	2+	Neg	Neg	0	0	0	0	NA	0	18/07/2015	NA	NA	Yes	30	Not ambiguous	Not ambiguous	2479	Neg	FALSE	M	Fixed	FALSE	1	1	1	1	0	0	0	0	Pos	Pos	Pos	Pos	Neg
M333	HS DE KITOY	No	Neg	NA	Neg	Neg	NA	Pos	Pos	Neg	Neg	0	0	0	0	Neg	Neg	0	0	0	0	NA	0	20/07/2015	NA	NA	Yes	42	Not ambiguous	Not ambiguous	2480	Neg	FALSE	M	Fixed	FALSE	0	0	0	0	0	0	0	0	Neg	Neg	Neg	Neg	Neg
L226	HS/NKARA	No	Neg	NA	Neg	Neg	NA	Neg	Neg	Neg	Neg	0	0	0	0	Pos	Pos	1+	1+	1+	1+	NA	0	22/06/2015	NA	NA	Yes	24	Not ambiguous	Not ambiguous	2481	Neg	FALSE	L	Fixed	FALSE	0	0	0	0	1	1	1	1	Neg	Neg	Neg	Neg	Pos
L231	HS/NKARA	No	Neg	NA	Neg	Neg	NA	Neg	Neg	Neg	Neg	0	0	0	0	Pos	Pos	1+	1+	1+	1+	NA	0	22/06/2015	NA	NA	Yes	44	Not ambiguous	Not ambiguous	2482	Neg	FALSE	L	Fixed	FALSE	0	0	0	0	1	1	1	1	Neg	Neg	Neg	Neg	Pos
L233	HS/NKARA	No	Neg	NA	Neg	Neg	NA	Neg	Neg	Pos	Pos	2+	2+	2+	2+	Neg	Neg	0	0	0	0	NA	0	22/06/2015	NA	NA	Yes	24	Not ambiguous	Not ambiguous	2483	Neg	FALSE	L	Fixed	FALSE	1	1	1	1	0	0	0	0	Pos	Pos	Pos	Pos	Neg
L240	HS/NKARA	No	Neg	NA	Neg	Neg	NA	Pos	Pos	Neg	Neg	0	0	0	0	Neg	Neg	0	0	0	0	NA	0	23/06/2015	NA	NA	Yes	11	Not ambiguous	Not ambiguous	2484	Neg	FALSE	L	Fixed	FALSE	0	0	0	0	0	0	0	0	Neg	Neg	Neg	Neg	Neg
L242	HS/NKARA	No	Neg	NA	Neg	Neg	NA	Pos	Pos	Neg	Neg	0	0	0	0	Neg	Neg	0	0	0	0	NA	0	24/06/2015	NA	NA	Yes	60	Not ambiguous	Not ambiguous	2485	Neg	FALSE	L	Fixed	FALSE	0	0	0	0	0	0	0	0	Neg	Neg	Neg	Neg	Neg
L254	HS/NKARA	No	Neg	NA	Neg	Neg	NA	Neg	Neg	Pos	Pos	1+	1+	0	0	Neg	Neg	0	0	0	0	NA	0	25/06/2015	1	NA	Yes	31	Not ambiguous	Not ambiguous	2486	Neg	FALSE	L	Fixed	FALSE	1	1	0	0	0	0	0	0	Pos	Pos	Neg	Neg	Neg
L258	HS/NKARA	No	Neg	NA	Neg	Neg	NA	Neg	Neg	Neg	Neg	0	0	0	0	Pos	Pos	1+	1+	0	0	NA	0	26/06/2015	NA	NA	Yes	36	Not ambiguous	Not ambiguous	2487	Neg	FALSE	L	Fixed	FALSE	0	0	0	0	1	1	0	0	Neg	Neg	Neg	Neg	Pos
L261	HS/NKARA	No	Neg	NA	Neg	Neg	NA	Neg	Neg	Pos	Pos	1+	1+	0	0	Neg	Neg	0	0	0	0	NA	0	26/06/2015	1	NA	Yes	28	Not ambiguous	Not ambiguous	2488	Neg	FALSE	L	Fixed	FALSE	1	1	0	0	0	0	0	0	Pos	Pos	Neg	Neg	Neg
L265	HS/NKARA	No	Neg	NA	Neg	Neg	NA	Neg	Neg	Neg	Neg	0	0	0	0	Pos	Pos	0	0	1+	1+	NA	0	26/06/2015	NA	NA	Yes	45	Not ambiguous	Not ambiguous	2489	Neg	FALSE	L	Fixed	FALSE	0	0	0	0	0	0	1	1	Neg	Neg	Neg	Neg	Neg
L274	HS/NKARA	No	Neg	NA	Pos	Pos	NA	Neg	Neg	Pos	Pos	1+	1+	1+	1+	Neg	Neg	0	0	0	0	NA	0	27/06/2015	25	NA	Yes	4	Not ambiguous	Not ambiguous	2490	Pos	TRUE	L	Fixed	FALSE	1	1	1	1	0	0	0	0	Pos	Pos	Pos	Pos	Neg
L292	HS/NKARA	No	Pos	Neg	Neg	Pos	NA	Pos	Pos	Pos	Pos	1+	1+	0	0	Pos	Pos	1+	1+	0	0	NA	0	03/07/2015	3	4	Yes	26	Not ambiguous	Not ambiguous	2491	Pos	TRUE	L	Fixed	FALSE	1	1	0	0	1	1	0	0	Pos	Pos	Neg	Neg	Pos
L298	HS/NKARA	No	Neg	NA	Neg	Neg	NA	Pos	Pos	Pos	Pos	1+	1+	1+	1+	Neg	Neg	0	0	0	0	NA	0	04/07/2015	3	NA	Yes	15	Not ambiguous	Not ambiguous	2492	Neg	FALSE	L	Fixed	FALSE	1	1	1	1	0	0	0	0	Pos	Pos	Pos	Pos	Neg
L299	HS/NKARA	No	Neg	NA	Neg	Neg	NA	Neg	Neg	Pos	Pos	1+	1+	0	0	Neg	Neg	0	0	0	0	NA	0	04/07/2015	2	NA	Yes	20	Not ambiguous	Not ambiguous	2493	Neg	FALSE	L	Fixed	FALSE	1	1	0	0	0	0	0	0	Pos	Pos	Neg	Neg	Neg
L331	HS/NKARA	No	Neg	NA	Neg	Neg	NA	Neg	Neg	Neg	Neg	0	0	0	0	Pos	Pos	1+	1+	2+	2+	NA	0	10/07/2015	NA	NA	Yes	5	Not ambiguous	Not ambiguous	2494	Neg	FALSE	L	Fixed	FALSE	0	0	0	0	1	1	1	1	Neg	Neg	Neg	Neg	Pos
M343	HS DE KITOY	No	Neg	NA	Neg	Neg	NA	Neg	Neg	Neg	Neg	0	0	0	0	Pos	Pos	2+	2+	2+	2+	NA	0	22/07/2015	NA	NA	Yes	70	Not ambiguous	Not ambiguous	2495	Neg	FALSE	M	Fixed	FALSE	0	0	0	0	1	1	1	1	Neg	Neg	Neg	Neg	Pos
M344	HS DE KITOY	No	Neg	NA	Neg	Neg	NA	Neg	Neg	Neg	Neg	0	0	0	0	Neg	Neg	0	0	0	0	NA	0	22/07/2015	NA	NA	Yes	0	Not ambiguous	Not ambiguous	2496	Neg	FALSE	M	Fixed	FALSE	0	0	0	0	0	0	0	0	Neg	Neg	Neg	Neg	Neg
M349	HS DE KITOY	No	Neg	NA	Neg	Neg	NA	Neg	Neg	Neg	Neg	0	0	0	0	Neg	Neg	0	0	0	0	NA	0	24/07/2015	NA	NA	Yes	21	Not ambiguous	Not ambiguous	2497	Neg	FALSE	M	Fixed	FALSE	0	0	0	0	0	0	0	0	Neg	Neg	Neg	Neg	Neg
A010	UM/BDD	No	Neg	NA	Neg	Neg	NA	Neg	Neg	Neg	Neg	0	0	0	0	Pos	Pos	0	0	4+	4+	NA	0	16/06/2015	NA	NA	Yes	18	Not ambiguous	Not ambiguous	2498	Neg	FALSE	A	Mobile	FALSE	0	0	0	0	0	0	1	1	Neg	Neg	Neg	Neg	Neg
A018	UM/BDD	No	Neg	NA	Neg	Neg	NA	Neg	Neg	Neg	Neg	0	0	0	0	Pos	Pos	0	0	4+	4+	NA	0	16/06/2015	NA	NA	Yes	1	Not ambiguous	Not ambiguous	2499	Neg	FALSE	A	Mobile	FALSE	0	0	0	0	0	0	1	1	Neg	Neg	Neg	Neg	Neg
M212	HS DE KITOY	No	Neg	NA	Neg	Neg	NA	Neg	Neg	Pos	Pos	1+	1+	1+	1+	Neg	Neg	0	0	0	0	NA	0	01/07/2015	12	NA	Yes	27	Not ambiguous	Not ambiguous	2500	Neg	FALSE	M	Fixed	FALSE	1	1	1	1	0	0	0	0	Pos	Pos	Pos	Pos	Neg
A087	UM/BDD	No	Neg	NA	Neg	Neg	NA	Neg	Neg	Pos	Pos	0	0	4+	4+	Neg	Neg	0	0	0	0	NA	0	16/06/2015	NA	NA	Yes	27	Not ambiguous	Not ambiguous	2501	Neg	FALSE	A	Mobile	FALSE	0	0	1	1	0	0	0	0	Neg	Neg	Pos	Pos	Neg
A101	UM/BDD	No	Neg	NA	Neg	Neg	NA	Pos	Pos	Neg	Neg	0	0	0	0	Pos	Pos	4+	4+	0	0	NA	0	16/06/2015	NA	NA	Yes	5	Not ambiguous	Not ambiguous	2502	Neg	FALSE	A	Mobile	FALSE	0	0	0	0	1	1	0	0	Neg	Neg	Neg	Neg	Pos
A110	UM/BDD	No	Neg	NA	Neg	Neg	NA	Neg	Neg	Pos	Pos	4+	4+	0	0	Neg	Neg	0	0	0	0	NA	0	16/06/2015	NA	NA	Yes	28	Not ambiguous	Not ambiguous	2503	Neg	FALSE	A	Mobile	FALSE	1	1	0	0	0	0	0	0	Pos	Pos	Neg	Neg	Neg
A132	UM/BANDUNDU	No	Neg	NA	Neg	Neg	NA	Neg	Neg	Pos	Pos	4+	4+	0	0	Neg	Neg	0	0	0	0	NA	0	16/06/2015	NA	NA	Yes	3	Not ambiguous	Not ambiguous	2504	Neg	FALSE	A	Mobile	FALSE	1	1	0	0	0	0	0	0	Pos	Pos	Neg	Neg	Neg
A138	UM/BDD	No	Neg	NA	Neg	Neg	NA	Neg	Neg	Neg	Neg	0	0	0	0	Pos	Pos	0	0	4+	4+	NA	0	16/06/2015	NA	NA	Yes	18	Not ambiguous	Not ambiguous	2505	Neg	FALSE	A	Mobile	FALSE	0	0	0	0	0	0	1	1	Neg	Neg	Neg	Neg	Neg
A150	UM/BDD	No	Neg	NA	Neg	Neg	NA	Neg	Neg	Pos	Pos	4+	4+	4+	4+	Neg	Neg	0	0	0	0	NA	0	16/06/2015	NA	NA	Yes	14	Not ambiguous	Not ambiguous	2506	Neg	FALSE	A	Mobile	FALSE	1	1	1	1	0	0	0	0	Pos	Pos	Pos	Pos	Neg
A151	UM/BDD	No	Neg	NA	Neg	Neg	NA	Neg	Neg	Pos	Pos	4+	4+	4+	4+	Neg	Neg	0	0	0	0	NA	0	16/06/2015	NA	NA	Yes	36	Not ambiguous	Not ambiguous	2507	Neg	FALSE	A	Mobile	FALSE	1	1	1	1	0	0	0	0	Pos	Pos	Pos	Pos	Neg
A153	UM/BDD	No	Neg	NA	Neg	Neg	NA	Neg	Neg	Pos	Pos	0	0	4+	4+	Neg	Neg	0	0	0	0	NA	0	16/06/2015	NA	NA	Yes	9	Not ambiguous	Not ambiguous	2508	Neg	FALSE	A	Mobile	FALSE	0	0	1	1	0	0	0	0	Neg	Neg	Pos	Pos	Neg
A155	UM/BDD	No	Neg	NA	Neg	Neg	NA	Neg	Neg	Neg	Neg	0	0	0	0	Pos	Neg	4+	0	0	0	NA	0	16/06/2015	NA	NA	Yes	38	Not ambiguous	Not ambiguous	2509	Neg	FALSE	A	Mobile	FALSE	0	0	0	0	1	0	0	0	Neg	Neg	Neg	Neg	Pos
A160	UM/BDD	No	Neg	NA	Neg	Neg	NA	Neg	Neg	Neg	Neg	0	0	0	0	Pos	Pos	4+	1+	0	0	NA	0	16/06/2015	NA	NA	Yes	45	Not ambiguous	Not ambiguous	2510	Neg	FALSE	A	Mobile	FALSE	0	0	0	0	1	1	0	0	Neg	Neg	Neg	Neg	Pos
A164	UM/BDD	No	Neg	NA	Neg	Neg	NA	Pos	Pos	Neg	Pos	0	0	0	1+	Pos	Neg	0	0	1+	0	NA	0	16/06/2015	NA	NA	Yes	2	Not ambiguous	Not ambiguous	2511	Neg	FALSE	A	Mobile	FALSE	0	0	0	1	0	0	1	0	Neg	Neg	Neg	Pos	Neg
A162	UM/BDD	No	Neg	NA	Neg	Neg	NA	Neg	Neg	Neg	Neg	0	0	0	0	Pos	Pos	0	0	4+	4+	NA	0	16/06/2015	NA	NA	Yes	43	Not ambiguous	Not ambiguous	2512	Neg	FALSE	A	Mobile	FALSE	0	0	0	0	0	0	1	1	Neg	Neg	Neg	Neg	Neg
A191	UM/BDD	No	Neg	NA	Neg	Neg	NA	Neg	Neg	Neg	Neg	0	0	0	0	Pos	Neg	0	0	4+	0	NA	0	16/06/2015	NA	NA	Yes	11	Not ambiguous	Not ambiguous	2513	Neg	FALSE	A	Mobile	FALSE	0	0	0	0	0	0	1	0	Neg	Neg	Neg	Neg	Neg
A207	UM/BDD	No	Neg	NA	Neg	Neg	NA	Neg	Neg	Pos	Pos	4+	4+	0	0	Neg	Neg	0	0	0	0	NA	0	16/06/2015	NA	NA	Yes	34	Not ambiguous	Not ambiguous	2514	Neg	FALSE	A	Mobile	FALSE	1	1	0	0	0	0	0	0	Pos	Pos	Neg	Neg	Neg
A1208	UM/BDD	No	Neg	NA	Neg	Neg	Neg	Neg	Neg	Neg	Neg	0	0	0	0	Pos	Pos	4+	4+	0	0	NA	0	22/06/2015	NA	NA	Yes	20	Not ambiguous	Not ambiguous	2515	Neg	FALSE	A	Mobile	FALSE	0	0	0	0	1	1	0	0	Neg	Neg	Neg	Neg	Pos
A210	UM/BDD	No	Neg	NA	Neg	Neg	NA	Neg	Neg	Neg	Neg	0	0	0	0	Pos	Pos	4+	4+	0	0	NA	0	17/06/2015	NA	NA	Yes	27	Not ambiguous	Not ambiguous	2516	Neg	FALSE	A	Mobile	FALSE	0	0	0	0	1	1	0	0	Neg	Neg	Neg	Neg	Pos
A232	UM/BDD	No	Neg	NA	Neg	Neg	NA	Neg	Neg	Pos	Pos	4+	4+	0	0	Neg	Neg	0	0	0	0	NA	0	17/06/2015	NA	NA	Yes	10	Not ambiguous	Not ambiguous	2517	Neg	FALSE	A	Mobile	FALSE	1	1	0	0	0	0	0	0	Pos	Pos	Neg	Neg	Neg
A246	UM/BDD	No	Neg	NA	Neg	Neg	NA	Pos	Pos	Neg	Neg	0	0	0	0	Pos	Pos	0	0	4+	4+	NA	0	17/06/2015	NA	NA	Yes	0	Not ambiguous	Not ambiguous	2518	Neg	FALSE	A	Mobile	FALSE	0	0	0	0	0	0	1	1	Neg	Neg	Neg	Neg	Neg
A250	UM/BDD	No	Neg	NA	Neg	Neg	NA	Pos	Pos	Neg	Neg	0	0	0	0	Neg	Neg	0	0	0	0	NA	0	17/06/2015	NA	NA	Yes	15	Not ambiguous	Not ambiguous	2519	Neg	FALSE	A	Mobile	FALSE	0	0	0	0	0	0	0	0	Neg	Neg	Neg	Neg	Neg
A264	UM/BDD	No	Neg	NA	Neg	Neg	NA	Neg	Neg	Neg	Neg	0	0	0	0	Pos	Pos	0	0	4+	4+	NA	0	17/06/2015	NA	NA	Yes	42	Not ambiguous	Not ambiguous	2520	Neg	FALSE	A	Mobile	FALSE	0	0	0	0	0	0	1	1	Neg	Neg	Neg	Neg	Neg
A274	UM/BDD	No	Neg	NA	Neg	Neg	Neg	Neg	Neg	Neg	Neg	0	0	0	0	Pos	Pos	4+	4+	4+	4+	NA	0	17/06/2015	NA	NA	Yes	22	Not ambiguous	Not ambiguous	2521	Neg	FALSE	A	Mobile	FALSE	0	0	0	0	1	1	1	1	Neg	Neg	Neg	Neg	Pos
A290	UM/BDD	No	Neg	NA	Neg	Neg	NA	Neg	Neg	Neg	Neg	0	0	0	0	Pos	Pos	4+	4+	0	0	NA	0	17/06/2015	NA	NA	Yes	53	Not ambiguous	Not ambiguous	2522	Neg	FALSE	A	Mobile	FALSE	0	0	0	0	1	1	0	0	Neg	Neg	Neg	Neg	Pos
A317	UM/BANDUNDU	No	Neg	NA	Neg	Neg	Neg	Neg	Neg	Neg	Neg	0	0	0	0	Pos	Pos	4+	4+	4+	4+	NA	0	17/06/2015	NA	NA	Yes	13	Not ambiguous	Not ambiguous	2523	Neg	FALSE	A	Mobile	FALSE	0	0	0	0	1	1	1	1	Neg	Neg	Neg	Neg	Pos
A326	UM/BDD	No	Neg	NA	Neg	Neg	NA	Neg	Neg	Neg	Neg	0	0	0	0	Pos	Pos	0	0	4+	4+	NA	0	17/06/2015	NA	NA	Yes	35	Not ambiguous	Not ambiguous	2524	Neg	FALSE	A	Mobile	FALSE	0	0	0	0	0	0	1	1	Neg	Neg	Neg	Neg	Neg
A358	UM/BANDUNDU	No	Neg	Neg	Neg	Neg	Neg	Neg	Neg	Pos	Pos	4+	4+	4+	4+	Neg	Neg	0	0	0	0	NA	0	17/06/2015	NA	2	Yes	13	Not ambiguous	Not ambiguous	2525	Neg	FALSE	A	Mobile	FALSE	1	1	1	1	0	0	0	0	Pos	Pos	Pos	Pos	Neg
A034	UM/BDD	No	Neg	NA	Neg	Neg	NA	Pos	Neg	Neg	Neg	0	0	0	0	Pos	Neg	4+	0	0	0	NA	0	16/06/2015	NA	NA	Yes	47	Not ambiguous	Not ambiguous	2527	Neg	FALSE	A	Mobile	FALSE	0	0	0	0	1	0	0	0	Neg	Neg	Neg	Neg	Pos
A036	UM/BDD	No	Neg	NA	Neg	Neg	NA	Neg	Neg	Neg	Neg	0	0	0	0	Pos	Neg	4+	0	0	0	NA	0	16/06/2015	NA	NA	Yes	26	Not ambiguous	Not ambiguous	2528	Neg	FALSE	A	Mobile	FALSE	0	0	0	0	1	0	0	0	Neg	Neg	Neg	Neg	Pos
A060	UM/BDD	No	Neg	NA	Neg	Neg	Neg	Neg	Neg	Neg	Neg	0	0	0	0	Pos	Pos	0	0	4+	4+	NA	0	16/06/2015	NA	NA	Yes	45	Not ambiguous	Not ambiguous	2529	Neg	FALSE	A	Mobile	FALSE	0	0	0	0	0	0	1	1	Neg	Neg	Neg	Neg	Neg
A064	UM/BDD	No	Neg	NA	Neg	Neg	NA	Pos	Pos	Neg	Neg	0	0	0	0	Neg	Neg	0	0	0	0	NA	0	16/06/2015	NA	NA	Yes	28	Not ambiguous	Not ambiguous	2530	Neg	FALSE	A	Mobile	FALSE	0	0	0	0	0	0	0	0	Neg	Neg	Neg	Neg	Neg
A065	UM/BDD	No	Neg	NA	Neg	Neg	NA	Neg	Neg	Pos	Neg	4+	0	0	0	Neg	Neg	0	0	0	0	NA	0	16/06/2015	NA	NA	Yes	56	Not ambiguous	Ambiguous	2531	Neg	FALSE	A	Mobile	FALSE	1	0	0	0	0	0	0	0	Pos	Neg	Neg	Neg	Neg
A478	UM/BDD	No	Neg	NA	Neg	Neg	NA	Pos	Pos	Neg	Pos	0	1+	0	2+	Neg	Neg	0	0	0	0	NA	0	21/06/2015	NA	NA	Yes	26	Not ambiguous	Not ambiguous	2532	Neg	FALSE	A	Mobile	FALSE	0	1	0	1	0	0	0	0	Neg	Pos	Neg	Pos	Neg
A403	UM/BDD	No	Neg	NA	Neg	Neg	Neg	Neg	Neg	Pos	Pos	4+	4+	0	0	Neg	Neg	0	0	0	0	NA	0	17/06/2015	NA	NA	Yes	7	Not ambiguous	Not ambiguous	2533	Neg	FALSE	A	Mobile	FALSE	1	1	0	0	0	0	0	0	Pos	Pos	Neg	Neg	Neg
A442	UM/BDD	No	Neg	NA	Neg	Neg	NA	Neg	Neg	Pos	Pos	4+	4+	0	0	Neg	Neg	0	0	0	0	NA	0	17/06/2015	NA	NA	Yes	46	Not ambiguous	Not ambiguous	2534	Neg	FALSE	A	Mobile	FALSE	1	1	0	0	0	0	0	0	Pos	Pos	Neg	Neg	Neg
A458	UM/BDD	No	Neg	NA	Neg	Neg	NA	Neg	Neg	Pos	Pos	4+	4+	0	0	Neg	Neg	0	0	0	0	NA	0	17/06/2015	NA	NA	Yes	14	Not ambiguous	Not ambiguous	2535	Neg	FALSE	A	Mobile	FALSE	1	1	0	0	0	0	0	0	Pos	Pos	Neg	Neg	Neg
A444	UM/BDD	No	Neg	NA	Neg	Neg	NA	Neg	Neg	Pos	Pos	4+	4+	4+	4+	Neg	Neg	0	0	0	0	NA	0	17/06/2015	NA	NA	Yes	6	Not ambiguous	Not ambiguous	2536	Neg	FALSE	A	Mobile	FALSE	1	1	1	1	0	0	0	0	Pos	Pos	Pos	Pos	Neg
A496	UM/BDD	No	Neg	NA	Neg	Neg	NA	Neg	Neg	Pos	Pos	4+	4+	0	0	Neg	Neg	0	0	0	0	NA	0	19/06/2015	NA	NA	Yes	9	Not ambiguous	Not ambiguous	2537	Neg	FALSE	A	Mobile	FALSE	1	1	0	0	0	0	0	0	Pos	Pos	Neg	Neg	Neg
A448	UM/BDD	No	Neg	NA	Neg	Neg	NA	Neg	Neg	Pos	Pos	4+	4+	0	0	Neg	Neg	0	0	0	0	NA	0	17/06/2015	NA	NA	Yes	17	Not ambiguous	Not ambiguous	2538	Neg	FALSE	A	Mobile	FALSE	1	1	0	0	0	0	0	0	Pos	Pos	Neg	Neg	Neg
A498	UM/BDD	No	Neg	NA	Neg	Neg	Neg	Pos	Pos	Pos	Pos	4+	4+	4+	4+	Neg	Neg	0	0	0	0	NA	0	19/06/2015	NA	NA	Yes	8	Not ambiguous	Not ambiguous	2539	Neg	FALSE	A	Mobile	FALSE	1	1	1	1	0	0	0	0	Pos	Pos	Pos	Pos	Neg
A533	UM/BDD	No	Neg	NA	Neg	Neg	NA	Neg	Neg	Pos	Pos	4+	4+	0	0	Neg	Neg	0	0	0	0	NA	0	19/06/2015	NA	NA	Yes	8	Not ambiguous	Not ambiguous	2540	Neg	FALSE	A	Mobile	FALSE	1	1	0	0	0	0	0	0	Pos	Pos	Neg	Neg	Neg
A560	UM/BDD	No	Neg	NA	Neg	Neg	Neg	Neg	Neg	Pos	Pos	4+	4+	4+	4+	Neg	Neg	0	0	0	0	NA	0	19/06/2015	NA	NA	Yes	12	Not ambiguous	Not ambiguous	2541	Neg	FALSE	A	Mobile	FALSE	1	1	1	1	0	0	0	0	Pos	Pos	Pos	Pos	Neg
A570	UM/BDD	No	Neg	NA	Neg	Neg	Neg	Neg	Neg	Pos	Pos	4+	4+	4+	4+	Neg	Neg	0	0	0	0	NA	0	19/06/2015	NA	NA	Yes	12	Not ambiguous	Not ambiguous	2542	Neg	FALSE	A	Mobile	FALSE	1	1	1	1	0	0	0	0	Pos	Pos	Pos	Pos	Neg
A596	UM/BDD	No	Neg	NA	Neg	Neg	NA	Neg	Neg	Pos	Pos	4+	4+	0	0	Neg	Neg	0	0	0	0	NA	0	19/06/2015	NA	NA	Yes	10	Not ambiguous	Not ambiguous	2543	Neg	FALSE	A	Mobile	FALSE	1	1	0	0	0	0	0	0	Pos	Pos	Neg	Neg	Neg
A615	UM/BDD	No	Neg	NA	Neg	Neg	NA	Pos	Pos	Neg	Neg	0	0	0	0	Neg	Neg	0	0	0	0	NA	0	19/06/2015	NA	NA	Yes	6	Not ambiguous	Not ambiguous	2544	Neg	FALSE	A	Mobile	FALSE	0	0	0	0	0	0	0	0	Neg	Neg	Neg	Neg	Neg
A625	UM/BDD	No	Neg	NA	Neg	Neg	NA	Neg	Neg	Neg	Neg	0	0	0	0	Pos	Pos	0	0	4+	4+	NA	0	19/06/2015	NA	NA	Yes	53	Not ambiguous	Not ambiguous	2545	Neg	FALSE	A	Mobile	FALSE	0	0	0	0	0	0	1	1	Neg	Neg	Neg	Neg	Neg
A638	UM/BDD	No	Neg	NA	Neg	Neg	NA	Neg	Neg	Neg	Neg	0	0	0	0	Pos	Pos	0	0	4+	4+	NA	0	19/06/2015	NA	NA	Yes	17	Not ambiguous	Not ambiguous	2546	Neg	FALSE	A	Mobile	FALSE	0	0	0	0	0	0	1	1	Neg	Neg	Neg	Neg	Neg
A640	UM/BDD	No	Neg	NA	Neg	Neg	NA	Neg	Neg	Pos	Pos	4+	4+	4+	4+	Pos	Neg	4+	0	4+	0	NA	0	19/06/2015	NA	NA	Yes	16	Not ambiguous	Not ambiguous	2547	Neg	FALSE	A	Mobile	FALSE	1	1	1	1	1	0	1	0	Pos	Pos	Pos	Pos	Pos
A651	UM/BDD	No	Neg	NA	Neg	Neg	NA	Neg	Neg	Neg	Neg	0	0	0	0	Pos	Pos	4+	4+	0	0	NA	0	19/06/2015	NA	NA	Yes	42	Not ambiguous	Not ambiguous	2548	Neg	FALSE	A	Mobile	FALSE	0	0	0	0	1	1	0	0	Neg	Neg	Neg	Neg	Pos
A681	UM/BDD	No	Neg	NA	Neg	Neg	NA	Pos	Pos	Neg	Neg	0	0	0	0	Neg	Neg	0	0	0	0	NA	0	19/06/2015	NA	NA	Yes	39	Not ambiguous	Not ambiguous	2549	Neg	FALSE	A	Mobile	FALSE	0	0	0	0	0	0	0	0	Neg	Neg	Neg	Neg	Neg
A612	UM/BDD	No	Neg	NA	Neg	Neg	Neg	Pos	Pos	Pos	Pos	4+	4+	0	4+	Pos	Pos	4+	4+	0	0	NA	0	19/06/2015	NA	NA	Yes	18	Not ambiguous	Not ambiguous	2550	Neg	FALSE	A	Mobile	FALSE	1	1	0	1	1	1	0	0	Pos	Pos	Neg	Pos	Pos
A616	UM/BDD	No	Neg	NA	Neg	Neg	Neg	Neg	Neg	Neg	Neg	0	0	0	0	Pos	Pos	0	0	4+	4+	NA	0	19/06/2015	NA	NA	Yes	45	Not ambiguous	Not ambiguous	2551	Neg	FALSE	A	Mobile	FALSE	0	0	0	0	0	0	1	1	Neg	Neg	Neg	Neg	Neg
A693	UM/BDD	No	Neg	NA	Neg	Neg	NA	Pos	Pos	Pos	Pos	4+	4+	0	0	Neg	Neg	0	0	0	0	NA	0	19/06/2015	NA	NA	Yes	14	Not ambiguous	Not ambiguous	2552	Neg	FALSE	A	Mobile	FALSE	1	1	0	0	0	0	0	0	Pos	Pos	Neg	Neg	Neg
A637	UM/BDD	No	Neg	NA	Neg	Neg	NA	Neg	Neg	Pos	Pos	4+	4+	4+	4+	Neg	Neg	0	0	0	0	NA	0	19/06/2015	NA	NA	Yes	35	Not ambiguous	Not ambiguous	2553	Neg	FALSE	A	Mobile	FALSE	1	1	1	1	0	0	0	0	Pos	Pos	Pos	Pos	Neg
A673	UM/BDD	No	Neg	NA	Neg	Neg	NA	Neg	Neg	Pos	Pos	4+	4+	4+	4+	Neg	Neg	0	0	0	0	NA	0	19/06/2015	NA	NA	Yes	13	Not ambiguous	Not ambiguous	2554	Neg	FALSE	A	Mobile	FALSE	1	1	1	1	0	0	0	0	Pos	Pos	Pos	Pos	Neg
A541	UM/BDD	No	Neg	NA	Neg	Neg	NA	Pos	Pos	Neg	Pos	0	4+	0	0	Neg	Neg	0	0	0	0	NA	0	19/06/2015	NA	NA	Yes	10	Not ambiguous	Not ambiguous	2555	Neg	FALSE	A	Mobile	FALSE	0	1	0	0	0	0	0	0	Neg	Pos	Neg	Neg	Neg
A745	UM/BDD	No	Neg	NA	Neg	Neg	NA	Pos	Pos	Neg	Neg	0	0	0	0	Pos	Pos	4+	4+	0	0	NA	0	20/06/2015	NA	NA	Yes	10	Not ambiguous	Not ambiguous	2556	Neg	FALSE	A	Mobile	FALSE	0	0	0	0	1	1	0	0	Neg	Neg	Neg	Neg	Pos
A754	UM/BDD	No	Neg	NA	Neg	Neg	NA	Neg	Neg	Neg	Neg	0	0	0	0	Pos	Pos	0	0	4+	4+	NA	0	20/06/2015	NA	NA	Yes	9	Not ambiguous	Not ambiguous	2557	Neg	FALSE	A	Mobile	FALSE	0	0	0	0	0	0	1	1	Neg	Neg	Neg	Neg	Neg
A766	UM/BDD	No	Neg	NA	Neg	Neg	NA	Neg	Neg	Neg	Neg	0	0	0	0	Pos	Pos	4+	4+	0	0	NA	0	20/06/2015	NA	NA	Yes	41	Not ambiguous	Not ambiguous	2558	Neg	FALSE	A	Mobile	FALSE	0	0	0	0	1	1	0	0	Neg	Neg	Neg	Neg	Pos
A774	UM/BDD	No	Neg	NA	Neg	Neg	NA	Neg	Neg	Pos	Pos	4+	4+	0	0	Neg	Neg	0	0	0	0	NA	0	20/06/2015	NA	NA	Yes	10	Not ambiguous	Not ambiguous	2559	Neg	FALSE	A	Mobile	FALSE	1	1	0	0	0	0	0	0	Pos	Pos	Neg	Neg	Neg
A775	UM/BDD	No	Neg	NA	Neg	Neg	NA	Neg	Neg	Neg	Pos	0	4+	0	0	Pos	Pos	4+	4+	0	0	NA	0	20/06/2015	NA	NA	Yes	2	Not ambiguous	Not ambiguous	2560	Neg	FALSE	A	Mobile	FALSE	0	1	0	0	1	1	0	0	Neg	Pos	Neg	Neg	Pos
A430	UM/BDD	No	Neg	NA	Neg	Neg	NA	Neg	Neg	Neg	Neg	0	0	0	0	Pos	Pos	0	0	4+	4+	NA	0	17/06/2015	NA	NA	Yes	10	Not ambiguous	Not ambiguous	2561	Neg	FALSE	A	Mobile	FALSE	0	0	0	0	0	0	1	1	Neg	Neg	Neg	Neg	Neg
A1325	UM/BDD	No	Neg	NA	Neg	Neg	NA	Neg	Neg	Pos	Pos	1+	1+	0	0	Neg	Neg	0	0	0	0	NA	0	24/06/2015	25	NA	Yes	24	Not ambiguous	Not ambiguous	2562	Neg	FALSE	A	Mobile	FALSE	1	1	0	0	0	0	0	0	Pos	Pos	Neg	Neg	Neg
A1322	UM/BDD	No	Neg	NA	Neg	Neg	NA	Pos	Pos	Neg	Neg	0	0	0	0	Neg	Neg	0	0	0	0	NA	0	24/06/2015	NA	NA	Yes	55	Not ambiguous	Not ambiguous	2563	Neg	FALSE	A	Mobile	FALSE	0	0	0	0	0	0	0	0	Neg	Neg	Neg	Neg	Neg
A1303	UM/BDD	No	Neg	NA	Neg	Neg	NA	Neg	Neg	Neg	Neg	0	0	0	0	Pos	Pos	2+	3+	2+	3+	NA	0	23/06/2015	NA	NA	Yes	9	Not ambiguous	Not ambiguous	2564	Neg	FALSE	A	Mobile	FALSE	0	0	0	0	1	1	1	1	Neg	Neg	Neg	Neg	Pos
A1302	UM/BDD	No	Neg	NA	Neg	Neg	Neg	Neg	Neg	Neg	Neg	0	0	0	0	Pos	Pos	2+	1+	0	0	NA	0	23/06/2015	NA	NA	Yes	12	Not ambiguous	Not ambiguous	2565	Neg	FALSE	A	Mobile	FALSE	0	0	0	0	1	1	0	0	Neg	Neg	Neg	Neg	Pos
A1301	UM/BDD	No	Neg	NA	Neg	Neg	Neg	Neg	Neg	Neg	Neg	0	0	0	0	Pos	Pos	0	0	3+	3+	NA	0	23/06/2015	NA	NA	Yes	37	Not ambiguous	Not ambiguous	2566	Neg	FALSE	A	Mobile	FALSE	0	0	0	0	0	0	1	1	Neg	Neg	Neg	Neg	Neg
A1299	UM/BDD	No	Neg	NA	Neg	Neg	NA	Neg	Neg	Neg	Neg	0	0	0	0	Pos	Pos	4+	4+	0	0	NA	0	23/06/2015	NA	NA	Yes	56	Not ambiguous	Not ambiguous	2567	Neg	FALSE	A	Mobile	FALSE	0	0	0	0	1	1	0	0	Neg	Neg	Neg	Neg	Pos
A1291	UM/BDD	No	Neg	NA	Neg	Neg	NA	Pos	Pos	Neg	Neg	0	0	0	0	Neg	Neg	0	0	0	0	NA	0	23/06/2015	NA	NA	Yes	20	Not ambiguous	Not ambiguous	2568	Neg	FALSE	A	Mobile	FALSE	0	0	0	0	0	0	0	0	Neg	Neg	Neg	Neg	Neg
A1281	UM/BDD	No	Neg	NA	Neg	Neg	NA	Pos	Pos	Neg	Neg	0	0	0	0	Pos	Pos	4+	4+	0	0	NA	0	23/06/2015	NA	NA	Yes	18	Not ambiguous	Not ambiguous	2569	Neg	FALSE	A	Mobile	FALSE	0	0	0	0	1	1	0	0	Neg	Neg	Neg	Neg	Pos
A1271	UM/BDD	No	Neg	NA	Neg	Neg	NA	Neg	Neg	Pos	Pos	3+	3+	1+	0	Neg	Neg	0	0	0	0	NA	0	23/06/2015	NA	NA	Yes	11	Not ambiguous	Not ambiguous	2571	Neg	FALSE	A	Mobile	FALSE	1	1	1	0	0	0	0	0	Pos	Pos	Pos	Neg	Neg
A1257	UM/BDD	No	Neg	NA	Neg	Neg	Neg	Pos	Pos	Neg	Neg	0	0	0	0	Neg	Neg	0	0	0	0	NA	0	23/06/2015	NA	NA	Yes	8	Not ambiguous	Not ambiguous	2572	Neg	FALSE	A	Mobile	FALSE	0	0	0	0	0	0	0	0	Neg	Neg	Neg	Neg	Neg
A1248	UM/BDD	No	Neg	NA	Neg	Neg	NA	Neg	Neg	Neg	Neg	0	0	0	0	Pos	Pos	0	0	2+	1+	NA	0	23/06/2015	NA	NA	Yes	6	Not ambiguous	Not ambiguous	2573	Neg	FALSE	A	Mobile	FALSE	0	0	0	0	0	0	1	1	Neg	Neg	Neg	Neg	Neg
A1339	UM/BDD	No	Neg	NA	Neg	Neg	NA	Neg	Neg	Pos	Pos	2+	2+	0	0	Neg	Neg	0	0	0	0	NA	0	24/06/2015	NA	NA	Yes	21	Not ambiguous	Not ambiguous	2574	Neg	FALSE	A	Mobile	FALSE	1	1	0	0	0	0	0	0	Pos	Pos	Neg	Neg	Neg
A1353	UM/BDD	No	Neg	NA	Neg	Neg	NA	Neg	Neg	Neg	Pos	0	1+	0	0	Neg	Neg	0	0	0	0	NA	0	24/06/2015	NA	NA	Yes	13	Not ambiguous	Not ambiguous	2575	Neg	FALSE	A	Mobile	FALSE	0	1	0	0	0	0	0	0	Neg	Pos	Neg	Neg	Neg
A1381	UM/BDD	No	Neg	NA	Neg	Neg	NA	Pos	Pos	Neg	Neg	0	0	0	0	Neg	Neg	0	0	0	0	NA	0	25/06/2015	NA	NA	Yes	33	Not ambiguous	Not ambiguous	2576	Neg	FALSE	A	Mobile	FALSE	0	0	0	0	0	0	0	0	Neg	Neg	Neg	Neg	Neg
A1390	UM/BDD	No	Neg	NA	Neg	Neg	NA	Neg	Neg	Neg	Neg	0	0	0	0	Pos	Pos	0	0	2+	3+	NA	0	25/06/2015	NA	NA	Yes	46	Not ambiguous	Not ambiguous	2577	Neg	FALSE	A	Mobile	FALSE	0	0	0	0	0	0	1	1	Neg	Neg	Neg	Neg	Neg
A1400	UM/BDD	No	Neg	NA	Neg	Neg	NA	Neg	Neg	Neg	Neg	0	0	0	0	Pos	Pos	0	0	3+	2+	NA	0	25/06/2015	NA	NA	Yes	10	Not ambiguous	Not ambiguous	2578	Neg	FALSE	A	Mobile	FALSE	0	0	0	0	0	0	1	1	Neg	Neg	Neg	Neg	Neg
A1415	UM/BDD	No	Neg	NA	Neg	Neg	NA	Neg	Neg	Pos	Pos	2+	2+	0	0	Neg	Neg	0	0	0	0	NA	0	25/06/2015	NA	NA	Yes	11	Not ambiguous	Not ambiguous	2580	Neg	FALSE	A	Mobile	FALSE	1	1	0	0	0	0	0	0	Pos	Pos	Neg	Neg	Neg
A1416	UM/BDD	No	Neg	NA	Neg	Neg	NA	Neg	Neg	Pos	Pos	0	0	2+	2+	Pos	Pos	0	2+	3+	0	NA	0	25/06/2015	NA	NA	Yes	54	Not ambiguous	Not ambiguous	2581	Neg	FALSE	A	Mobile	FALSE	0	0	1	1	0	1	1	0	Neg	Neg	Pos	Pos	Neg
A1418	UM/BDD	No	Neg	NA	Neg	Neg	NA	Neg	Neg	Neg	Neg	0	0	0	0	Pos	Pos	2+	3+	0	0	NA	0	25/06/2015	NA	NA	Yes	10	Not ambiguous	Not ambiguous	2582	Neg	FALSE	A	Mobile	FALSE	0	0	0	0	1	1	0	0	Neg	Neg	Neg	Neg	Pos
A1213	UM/BDD	No	Neg	NA	Neg	Neg	NA	Pos	Pos	Neg	Neg	0	0	0	0	Neg	Neg	0	0	0	0	NA	0	22/06/2015	NA	NA	Yes	4	Not ambiguous	Not ambiguous	2584	Neg	FALSE	A	Mobile	FALSE	0	0	0	0	0	0	0	0	Neg	Neg	Neg	Neg	Neg
A1175	UM/BDD	No	Neg	NA	Neg	Neg	NA	Neg	Neg	Pos	Pos	2+	2+	1+	1+	Neg	Neg	0	0	0	0	NA	0	22/06/2015	NA	NA	Yes	24	Not ambiguous	Not ambiguous	2585	Neg	FALSE	A	Mobile	FALSE	1	1	1	1	0	0	0	0	Pos	Pos	Pos	Pos	Neg
A1133	UM/BDD	No	Neg	NA	Neg	Neg	NA	Neg	Neg	Neg	Neg	0	0	0	0	Pos	Pos	0	0	2+	2+	NA	0	22/06/2015	NA	NA	Yes	2	Not ambiguous	Not ambiguous	2586	Neg	FALSE	A	Mobile	FALSE	0	0	0	0	0	0	1	1	Neg	Neg	Neg	Neg	Neg
A1138	UM/BDD	No	Neg	NA	Neg	Neg	NA	Neg	Neg	Pos	Pos	2+	2+	0	0	Neg	Neg	0	0	0	0	NA	0	22/06/2015	NA	NA	Yes	12	Not ambiguous	Not ambiguous	2587	Neg	FALSE	A	Mobile	FALSE	1	1	0	0	0	0	0	0	Pos	Pos	Neg	Neg	Neg
A1162	UM/BDD	No	Neg	NA	Neg	Neg	NA	Neg	Neg	Neg	Neg	0	0	0	0	Pos	Pos	2+	2+	0	0	NA	0	22/06/2015	NA	NA	Yes	13	Not ambiguous	Not ambiguous	2588	Neg	FALSE	A	Mobile	FALSE	0	0	0	0	1	1	0	0	Neg	Neg	Neg	Neg	Pos
A1129	UM/BDD	No	Neg	NA	Neg	Neg	NA	Pos	Pos	Neg	Neg	0	0	0	0	Pos	Pos	2+	1+	0	0	NA	0	22/06/2015	NA	NA	Yes	69	Not ambiguous	Not ambiguous	2589	Neg	FALSE	A	Mobile	FALSE	0	0	0	0	1	1	0	0	Neg	Neg	Neg	Neg	Pos
A1130	UM/BDD	No	Neg	NA	Neg	Neg	NA	Neg	Neg	Neg	Neg	0	0	0	0	Pos	Pos	2+	2+	2+	2+	NA	0	22/06/2015	NA	NA	Yes	11	Not ambiguous	Not ambiguous	2590	Neg	FALSE	A	Mobile	FALSE	0	0	0	0	1	1	1	1	Neg	Neg	Neg	Neg	Pos
A1118	UM/BDD	No	Neg	NA	Neg	Neg	NA	Neg	Neg	Neg	Neg	0	0	0	0	Pos	Pos	1+	2+	0	0	NA	0	21/06/2015	NA	NA	Yes	23	Not ambiguous	Not ambiguous	2591	Neg	FALSE	A	Mobile	FALSE	0	0	0	0	1	1	0	0	Neg	Neg	Neg	Neg	Pos
A1099	UM/BDD	No	Neg	NA	Neg	Neg	NA	Neg	Neg	Pos	Pos	2+	2+	0	0	Neg	Neg	0	0	0	0	NA	0	21/06/2015	NA	NA	Yes	56	Not ambiguous	Not ambiguous	2592	Neg	FALSE	A	Mobile	FALSE	1	1	0	0	0	0	0	0	Pos	Pos	Neg	Neg	Neg
A1115	UM/BDD	No	Neg	NA	Neg	Neg	NA	Neg	Neg	Neg	Neg	0	0	0	0	Pos	Pos	2+	3+	0	0	NA	0	22/06/2015	NA	NA	Yes	24	Not ambiguous	Not ambiguous	2593	Neg	FALSE	A	Mobile	FALSE	0	0	0	0	1	1	0	0	Neg	Neg	Neg	Neg	Pos
A1094	UM/BDD	No	Neg	NA	Neg	Neg	NA	Neg	Neg	Neg	Neg	0	0	0	0	Pos	Pos	0	0	2+	2+	NA	0	21/06/2015	NA	NA	Yes	8	Not ambiguous	Not ambiguous	2594	Neg	FALSE	A	Mobile	FALSE	0	0	0	0	0	0	1	1	Neg	Neg	Neg	Neg	Neg
A1079	UM/BDD	No	Neg	NA	Neg	Neg	NA	Pos	Pos	Neg	Neg	0	0	0	0	Neg	Neg	0	0	0	0	NA	0	21/06/2015	NA	NA	Yes	59	Not ambiguous	Not ambiguous	2595	Neg	FALSE	A	Mobile	FALSE	0	0	0	0	0	0	0	0	Neg	Neg	Neg	Neg	Neg
A1077	UM/BDD	No	Neg	NA	Neg	Neg	NA	Neg	Neg	Pos	Neg	2+	0	0	0	Neg	Neg	0	0	0	0	NA	0	21/06/2015	NA	NA	Yes	9	Not ambiguous	Not ambiguous	2596	Neg	FALSE	A	Mobile	FALSE	1	0	0	0	0	0	0	0	Pos	Neg	Neg	Neg	Neg
A1036	UM/BDD	No	Neg	NA	Neg	Neg	NA	Neg	Neg	Pos	Pos	2+	2+	0	1+	Neg	Neg	0	0	0	0	NA	0	21/06/2015	NA	NA	Yes	3	Not ambiguous	Not ambiguous	2597	Neg	FALSE	A	Mobile	FALSE	1	1	0	1	0	0	0	0	Pos	Pos	Neg	Pos	Neg
A1044	UM/BDD	No	Neg	NA	Neg	Neg	NA	Neg	Neg	Neg	Neg	0	0	0	0	Pos	Pos	0	1+	2+	1+	NA	0	21/06/2015	NA	NA	Yes	23	Not ambiguous	Not ambiguous	2598	Neg	FALSE	A	Mobile	FALSE	0	0	0	0	0	1	1	1	Neg	Neg	Neg	Neg	Neg
A1051	UM/BDD	No	Neg	NA	Neg	Neg	NA	Pos	Pos	Neg	Neg	0	0	0	0	Neg	Neg	0	0	0	0	NA	0	21/06/2015	NA	NA	Yes	12	Not ambiguous	Not ambiguous	2599	Neg	FALSE	A	Mobile	FALSE	0	0	0	0	0	0	0	0	Neg	Neg	Neg	Neg	Neg
A1435	UM/BANDUNDU	No	Neg	NA	Neg	Neg	NA	Pos	Pos	Neg	Neg	0	0	0	0	Pos	Pos	2+	2+	2+	2+	NA	0	25/06/2015	NA	NA	Yes	3	Not ambiguous	Not ambiguous	2601	Neg	FALSE	A	Mobile	FALSE	0	0	0	0	1	1	1	1	Neg	Neg	Neg	Neg	Pos
A1437	UM/BDD	No	Neg	NA	Neg	Neg	NA	Pos	Pos	Pos	Pos	2+	2+	2+	2+	Pos	Pos	3+	3+	0	0	NA	0	25/06/2015	NA	NA	Yes	12	Not ambiguous	Not ambiguous	2602	Neg	FALSE	A	Mobile	FALSE	1	1	1	1	1	1	0	0	Pos	Pos	Pos	Pos	Pos
A1438	UM/BDD	No	Neg	NA	Neg	Neg	NA	Neg	Neg	Neg	Neg	0	0	0	0	Pos	Pos	0	2+	1+	2+	NA	0	25/06/2015	NA	NA	Yes	34	Not ambiguous	Not ambiguous	2603	Neg	FALSE	A	Mobile	FALSE	0	0	0	0	0	1	1	1	Neg	Neg	Neg	Neg	Neg
A1448	UM/BDD	No	Neg	NA	Neg	Neg	Neg	Neg	Neg	Neg	Neg	0	0	0	0	Pos	Pos	2+	2+	0	0	NA	0	25/06/2015	NA	NA	Yes	4	Not ambiguous	Not ambiguous	2604	Neg	FALSE	A	Mobile	FALSE	0	0	0	0	1	1	0	0	Neg	Neg	Neg	Neg	Pos
A1466	UM/BANDUNDU	No	Neg	NA	Neg	Neg	NA	Neg	Neg	Neg	Neg	0	0	0	0	Pos	Pos	0	1+	2+	2+	NA	0	25/06/2015	NA	NA	Yes	41	Not ambiguous	Not ambiguous	2605	Neg	FALSE	A	Mobile	FALSE	0	0	0	0	0	1	1	1	Neg	Neg	Neg	Neg	Neg
A1480	UM/BDD	No	Neg	NA	Neg	Neg	NA	Neg	Neg	Pos	Pos	3+	3+	2+	2+	Pos	Pos	2+	2+	1+	0	NA	0	25/06/2015	NA	NA	Yes	31	Not ambiguous	Not ambiguous	2606	Neg	FALSE	A	Mobile	FALSE	1	1	1	1	1	1	1	0	Pos	Pos	Pos	Pos	Pos
A1501	UM/BDD	No	Neg	NA	Neg	Neg	NA	Neg	Neg	Neg	Neg	0	0	0	0	Pos	Pos	0	2+	1+	1+	NA	0	25/06/2015	NA	NA	Yes	35	Not ambiguous	Not ambiguous	2607	Neg	FALSE	A	Mobile	FALSE	0	0	0	0	0	1	1	1	Neg	Neg	Neg	Neg	Neg
A1508	UM/BDD	No	Neg	NA	Neg	Neg	NA	Neg	Neg	Pos	Pos	0	0	2+	2+	Neg	Neg	0	0	0	0	NA	0	25/06/2015	NA	NA	Yes	18	Not ambiguous	Not ambiguous	2608	Neg	FALSE	A	Mobile	FALSE	0	0	1	1	0	0	0	0	Neg	Neg	Pos	Pos	Neg
A1509	UM/BDD	No	Neg	NA	Neg	Neg	NA	Neg	Neg	Pos	Pos	3+	3+	0	0	Neg	Neg	0	0	0	0	NA	0	25/06/2015	NA	NA	Yes	43	Not ambiguous	Not ambiguous	2609	Neg	FALSE	A	Mobile	FALSE	1	1	0	0	0	0	0	0	Pos	Pos	Neg	Neg	Neg
A1519	UM/BDD	No	Neg	NA	Neg	Neg	NA	Neg	Neg	Pos	Pos	3+	2+	1+	1+	Neg	Neg	0	0	0	0	NA	0	25/06/2015	NA	NA	Yes	11	Not ambiguous	Not ambiguous	2610	Neg	FALSE	A	Mobile	FALSE	1	1	1	1	0	0	0	0	Pos	Pos	Pos	Pos	Neg
A1522	UM/BDD	No	Neg	NA	Neg	Neg	NA	Neg	Neg	Neg	Neg	0	0	0	0	Pos	Pos	2+	1+	0	0	NA	0	25/06/2015	NA	NA	Yes	31	Not ambiguous	Not ambiguous	2611	Neg	FALSE	A	Mobile	FALSE	0	0	0	0	1	1	0	0	Neg	Neg	Neg	Neg	Pos
A1526	UM/BDD	No	Neg	NA	Neg	Neg	Neg	Neg	Neg	Neg	Neg	0	0	0	0	Pos	Pos	2+	1+	0	0	NA	0	25/06/2015	NA	NA	Yes	15	Not ambiguous	Not ambiguous	2612	Neg	FALSE	A	Mobile	FALSE	0	0	0	0	1	1	0	0	Neg	Neg	Neg	Neg	Pos
A1528	UM/BDD	No	Neg	NA	Neg	Neg	NA	Neg	Neg	Neg	Neg	0	0	0	0	Pos	Pos	2+	1+	0	0	NA	0	25/06/2015	NA	NA	Yes	10	Not ambiguous	Not ambiguous	2613	Neg	FALSE	A	Mobile	FALSE	0	0	0	0	1	1	0	0	Neg	Neg	Neg	Neg	Pos
A1529	UM/BDD	No	Neg	NA	Neg	Neg	NA	Neg	Neg	Neg	Neg	0	0	0	0	Pos	Pos	1+	1+	0	0	NA	0	25/06/2015	NA	NA	Yes	7	Not ambiguous	Not ambiguous	2614	Neg	FALSE	A	Mobile	FALSE	0	0	0	0	1	1	0	0	Neg	Neg	Neg	Neg	Pos
A1536	UM/BDD	No	Neg	NA	Neg	Neg	Neg	Neg	Neg	Pos	Pos	3+	3+	0	0	Pos	Pos	2+	2+	2+	2+	NA	0	25/06/2015	NA	NA	Yes	12	Not ambiguous	Not ambiguous	2615	Neg	FALSE	A	Mobile	FALSE	1	1	0	0	1	1	1	1	Pos	Pos	Neg	Neg	Pos
A1538	UM/BDD	No	Neg	NA	Neg	Neg	NA	Neg	Neg	Neg	Neg	0	0	0	0	Pos	Pos	0	0	2+	1+	NA	0	25/06/2015	NA	NA	Yes	18	Not ambiguous	Not ambiguous	2616	Neg	FALSE	A	Mobile	FALSE	0	0	0	0	0	0	1	1	Neg	Neg	Neg	Neg	Neg
A1539	UM/BDD	No	Neg	NA	Neg	Neg	Neg	Pos	Pos	Neg	Neg	0	0	0	0	Neg	Neg	0	0	0	0	NA	0	25/06/2015	NA	NA	Yes	25	Not ambiguous	Not ambiguous	2617	Neg	FALSE	A	Mobile	FALSE	0	0	0	0	0	0	0	0	Neg	Neg	Neg	Neg	Neg
A1543	UM/BDD	No	Neg	NA	Neg	Neg	NA	Neg	Neg	Neg	Neg	0	0	0	0	Pos	Pos	0	3+	3+	4+	NA	0	25/06/2015	NA	NA	Yes	10	Not ambiguous	Not ambiguous	2618	Neg	FALSE	A	Mobile	FALSE	0	0	0	0	0	1	1	1	Neg	Neg	Neg	Neg	Neg
A1060	UM/BDD	No	Neg	NA	Neg	Neg	NA	Neg	Neg	Neg	Neg	0	0	0	0	Pos	Pos	0	0	2+	1+	NA	0	21/06/2015	NA	NA	Yes	13	Not ambiguous	Not ambiguous	2619	Neg	FALSE	A	Mobile	FALSE	0	0	0	0	0	0	1	1	Neg	Neg	Neg	Neg	Neg
A1066	UM/BDD	No	Neg	NA	Neg	Neg	NA	Neg	Neg	Pos	Pos	0	0	2+	1+	Neg	Neg	0	0	0	0	NA	0	21/06/2015	NA	NA	Yes	43	Not ambiguous	Not ambiguous	2620	Neg	FALSE	A	Mobile	FALSE	0	0	1	1	0	0	0	0	Neg	Neg	Pos	Pos	Neg
M005	HS DE KITOY	No	Neg	NA	Neg	Neg	NA	Neg	Neg	Pos	Pos	1+	1+	1+	1+	Pos	Pos	1+	1+	1+	1+	NA	0	01/06/2015	13	NA	Yes	8	Not ambiguous	Not ambiguous	2621	Neg	FALSE	M	Fixed	FALSE	1	1	1	1	1	1	1	1	Pos	Pos	Pos	Pos	Pos
M014	HS DE KITOY	No	Neg	NA	Neg	Neg	NA	Pos	Neg	Neg	Neg	0	0	0	0	Pos	Pos	1+	1+	1+	1+	NA	0	03/06/2015	NA	NA	Yes	21	Not ambiguous	Not ambiguous	2622	Neg	FALSE	M	Fixed	FALSE	0	0	0	0	1	1	1	1	Neg	Neg	Neg	Neg	Pos
M026	HS DE KITOY	No	Neg	NA	Neg	Neg	NA	Pos	Pos	Neg	Neg	0	0	0	0	Pos	Pos	1+	1+	2+	2+	NA	0	04/06/2015	NA	NA	Yes	46	Not ambiguous	Not ambiguous	2623	Neg	FALSE	M	Fixed	FALSE	0	0	0	0	1	1	1	1	Neg	Neg	Neg	Neg	Pos
M036	HS DE KITOY	No	Neg	NA	Neg	Neg	NA	Neg	Pos	Neg	Neg	0	0	0	0	Neg	Neg	0	0	0	0	NA	0	06/06/2015	NA	NA	Yes	27	Not ambiguous	Not ambiguous	2624	Neg	FALSE	M	Fixed	FALSE	0	0	0	0	0	0	0	0	Neg	Neg	Neg	Neg	Neg
M040	HS DE KITOY	No	Neg	NA	Neg	Neg	NA	Neg	Neg	Pos	Pos	1+	1+	1+	1+	Neg	Neg	0	0	0	0	NA	0	08/06/2015	16	NA	Yes	10	Not ambiguous	Not ambiguous	2625	Neg	FALSE	M	Fixed	FALSE	1	1	1	1	0	0	0	0	Pos	Pos	Pos	Pos	Neg
M047	HS DE KITOY	No	Neg	NA	Neg	Neg	NA	Pos	Pos	Neg	Neg	0	0	0	0	Pos	Pos	1+	1+	1+	1+	NA	0	09/06/2015	NA	NA	Yes	37	Not ambiguous	Not ambiguous	2626	Neg	FALSE	M	Fixed	FALSE	0	0	0	0	1	1	1	1	Neg	Neg	Neg	Neg	Pos
M146	HS DE KITOY	No	Neg	NA	Neg	Neg	NA	Neg	Neg	Neg	Neg	0	0	0	0	Pos	Pos	1+	2+	1+	2+	NA	0	27/06/2015	NA	NA	Yes	36	Not ambiguous	Not ambiguous	2627	Neg	FALSE	M	Fixed	FALSE	0	0	0	0	1	1	1	1	Neg	Neg	Neg	Neg	Pos
M362	HS DE KITOY	No	Neg	NA	Neg	Neg	NA	Neg	Neg	Neg	Neg	0	0	0	0	Pos	Pos	2+	2+	0	0	NA	0	27/07/2015	NA	NA	Yes	33	Not ambiguous	Not ambiguous	2628	Neg	FALSE	M	Fixed	FALSE	0	0	0	0	1	1	0	0	Neg	Neg	Neg	Neg	Pos
M358	HS DE KITOY	No	Neg	NA	Neg	Neg	NA	Neg	Neg	Neg	Neg	0	0	0	0	Pos	Pos	1+	1+	1+	1+	NA	0	27/07/2015	NA	NA	Yes	3	Not ambiguous	Not ambiguous	2629	Neg	FALSE	M	Fixed	FALSE	0	0	0	0	1	1	1	1	Neg	Neg	Neg	Neg	Pos
M355	HS DE KITOY	No	Neg	NA	Neg	Neg	NA	Neg	Neg	Neg	Neg	0	0	0	0	Pos	Pos	0	0	2+	2+	NA	0	27/07/2015	NA	NA	Yes	35	Not ambiguous	Not ambiguous	2630	Neg	FALSE	M	Fixed	FALSE	0	0	0	0	0	0	1	1	Neg	Neg	Neg	Neg	Neg
M354	HS DE KITOY	No	Neg	NA	Neg	Neg	NA	Neg	Neg	Pos	Pos	0	2+	1+	0	Pos	Pos	0	0	1+	1+	NA	0	27/07/2015	NA	NA	Yes	18	Not ambiguous	Not ambiguous	2631	Neg	FALSE	M	Fixed	FALSE	0	1	1	0	0	0	1	1	Neg	Pos	Pos	Neg	Neg
A3325	UM/BDD	No	Neg	Pos	Pos	NA	NA	Neg	Neg	Pos	Pos	4+	2+	4+	2+	Neg	Neg	0	0	0	0	NA	0	29/07/2015	NA	10	Yes	2	Not ambiguous	Not ambiguous	2632	Pos	TRUE	A	Mobile	FALSE	1	1	1	1	0	0	0	0	Pos	Pos	Pos	Pos	Neg
C0062	UM/MUSHIE	No	Neg	Neg	Pos	NA	NA	Neg	Neg	Neg	Neg	0	0	0	0	Pos	Pos	0	0	2+	2+	NA	0	30/07/2015	NA	4	Yes	41	Not ambiguous	Not ambiguous	2633	Pos	TRUE	C	Mobile	FALSE	0	0	0	0	0	0	1	1	Neg	Neg	Neg	Neg	Neg
C0061	UM/MUSHIE	No	Pos	Neg	NA	Neg	NA	Pos	Pos	Pos	Pos	2+	1+	2+	1+	Neg	Neg	0	0	0	0	NA	0	30/07/2015	NA	2	Yes	67	Not ambiguous	Not ambiguous	2634	Pos	TRUE	C	Mobile	FALSE	1	1	1	1	0	0	0	0	Pos	Pos	Pos	Pos	Neg
C0056	UM/MUSHIE	No	NA	Neg	NA	NA	Pos	Neg	Neg	Pos	Pos	1+	1+	1+	1+	Pos	Pos	0	0	1+	1+	NA	0	28/07/2015	7	3	Yes	30	Not ambiguous	Not ambiguous	2635	Pos	TRUE	C	Mobile	FALSE	1	1	1	1	0	0	1	1	Pos	Pos	Pos	Pos	Neg
C0055	UM/MUSHIE	No	Neg	Neg	Pos	NA	NA	Neg	Neg	Neg	Neg	0	0	0	0	Pos	Pos	0	0	1+	3+	NA	0	28/07/2015	NA	2	Yes	55	Not ambiguous	Not ambiguous	2636	Pos	TRUE	C	Mobile	FALSE	0	0	0	0	0	0	1	1	Neg	Neg	Neg	Neg	Neg
C0054	UM/MUSHIE	No	NA	Neg	NA	NA	Pos	Neg	Neg	Pos	Pos	2+	1+	2+	1+	Neg	Neg	0	0	0	0	NA	0	27/07/2015	NA	6	Yes	5	Not ambiguous	Not ambiguous	2637	Pos	TRUE	C	Mobile	FALSE	1	1	1	1	0	0	0	0	Pos	Pos	Pos	Pos	Neg
C0052	UM/MUSHIE	No	Pos	Neg	NA	NA	NA	Neg	Neg	Neg	Neg	0	0	0	0	Pos	Pos	0	0	2+	2+	NA	0	25/07/2015	NA	4	Yes	15	Not ambiguous	Not ambiguous	2638	Pos	TRUE	C	Mobile	FALSE	0	0	0	0	0	0	1	1	Neg	Neg	Neg	Neg	Neg
C0051	UM/MUSHIE	No	Neg	Neg	Pos	NA	NA	Neg	Neg	Neg	Neg	0	0	0	0	Pos	Pos	2+	2+	0	0	NA	0	25/07/2015	NA	1	Yes	2	Not ambiguous	Not ambiguous	2639	Pos	TRUE	C	Mobile	FALSE	0	0	0	0	1	1	0	0	Neg	Neg	Neg	Neg	Pos
C0050	UM/MUSHIE	No	Neg	Neg	Pos	NA	NA	Neg	Neg	Neg	Neg	0	0	0	0	Pos	Pos	0	0	2+	2+	NA	0	25/07/2015	NA	4	Yes	55	Not ambiguous	Not ambiguous	2640	Pos	TRUE	C	Mobile	FALSE	0	0	0	0	0	0	1	1	Neg	Neg	Neg	Neg	Neg
C0048	UM/MUSHIE	No	Neg	Neg	Pos	NA	NA	Neg	Neg	Neg	Neg	0	0	0	0	Pos	Pos	0	0	2+	2+	NA	0	24/07/2015	NA	3	Yes	35	Not ambiguous	Not ambiguous	2641	Pos	TRUE	C	Mobile	FALSE	0	0	0	0	0	0	1	1	Neg	Neg	Neg	Neg	Neg
C0047	UM/MUSHIE	No	Pos	Neg	NA	NA	NA	Neg	Neg	Neg	Neg	0	0	0	0	Pos	Pos	0	0	1+	3+	NA	0	24/07/2015	NA	7	Yes	31	Not ambiguous	Not ambiguous	2642	Pos	TRUE	C	Mobile	FALSE	0	0	0	0	0	0	1	1	Neg	Neg	Neg	Neg	Neg
C0045	UM/MUSHIE	No	Pos	Neg	NA	NA	NA	Pos	Pos	Pos	Pos	2+	2+	3+	3+	Pos	Pos	2+	2+	2+	2+	NA	0	23/07/2015	8	6	Yes	51	Not ambiguous	Not ambiguous	2643	Pos	TRUE	C	Mobile	FALSE	1	1	1	1	1	1	1	1	Pos	Pos	Pos	Pos	Pos
C0042	UM/MUSHIE	No	Neg	Neg	Pos	NA	NA	Neg	Neg	Neg	Neg	0	0	0	0	Pos	Pos	1+	1+	0	0	NA	0	23/07/2015	NA	3	Yes	64	Not ambiguous	Not ambiguous	2644	Pos	TRUE	C	Mobile	FALSE	0	0	0	0	1	1	0	0	Neg	Neg	Neg	Neg	Pos
C0040	UM/MUSHIE	No	Pos	Neg	NA	NA	NA	Neg	Neg	Pos	Pos	1+	1+	1+	1+	Neg	Neg	0	0	0	0	NA	0	22/07/2015	8	5	Yes	45	Not ambiguous	Not ambiguous	2645	Pos	TRUE	C	Mobile	FALSE	1	1	1	1	0	0	0	0	Pos	Pos	Pos	Pos	Neg
C0039	UM/MUSHIE	No	Neg	Neg	Pos	NA	NA	Neg	Neg	Neg	Neg	0	0	0	0	Pos	Pos	0	0	1+	1+	NA	0	22/07/2015	NA	2	Yes	22	Not ambiguous	Not ambiguous	2646	Pos	TRUE	C	Mobile	FALSE	0	0	0	0	0	0	1	1	Neg	Neg	Neg	Neg	Neg
C0037	UM/MUSHIE	No	Neg	Neg	Pos	NA	NA	Pos	Pos	Neg	Neg	0	0	0	0	Neg	Neg	0	0	0	0	NA	0	22/07/2015	NA	6	Yes	49	Not ambiguous	Not ambiguous	2647	Pos	TRUE	C	Mobile	FALSE	0	0	0	0	0	0	0	0	Neg	Neg	Neg	Neg	Neg
C0036	UM/MUSHIE	No	Pos	Neg	NA	NA	NA	Pos	Pos	Neg	Neg	0	0	0	0	Neg	Neg	0	0	0	0	NA	0	22/07/2015	NA	6	Yes	63	Not ambiguous	Not ambiguous	2648	Pos	TRUE	C	Mobile	FALSE	0	0	0	0	0	0	0	0	Neg	Neg	Neg	Neg	Neg
C0035	UM/MUSHIE	No	Neg	Neg	Pos	NA	NA	Neg	Neg	Neg	Neg	0	0	0	0	Pos	Pos	1+	1+	1+	1+	NA	0	22/07/2015	NA	4	Yes	63	Not ambiguous	Not ambiguous	2649	Pos	TRUE	C	Mobile	FALSE	0	0	0	0	1	1	1	1	Neg	Neg	Neg	Neg	Pos
C0034	UM/MUSHIE	No	NA	Neg	NA	NA	Pos	Neg	Neg	Neg	Neg	0	0	0	0	Pos	Pos	1+	1+	1+	1+	NA	0	22/07/2015	NA	4	Yes	18	Not ambiguous	Not ambiguous	2650	Pos	TRUE	C	Mobile	FALSE	0	0	0	0	1	1	1	1	Neg	Neg	Neg	Neg	Pos
C0033	UM/MUSHIE	No	Pos	Neg	NA	NA	NA	Neg	Neg	Pos	Pos	1+	1+	1+	1+	Neg	Neg	0	0	0	0	NA	0	22/07/2015	15	4	Yes	10	Not ambiguous	Not ambiguous	2651	Pos	TRUE	C	Mobile	FALSE	1	1	1	1	0	0	0	0	Pos	Pos	Pos	Pos	Neg
C0030	UM/MUSHIE	No	Pos	Neg	NA	NA	NA	Pos	Pos	Pos	Pos	1+	1+	1+	1+	Neg	Neg	0	0	0	0	NA	0	22/07/2015	26	3	Yes	13	Not ambiguous	Not ambiguous	2652	Pos	TRUE	C	Mobile	FALSE	1	1	1	1	0	0	0	0	Pos	Pos	Pos	Pos	Neg
C0023	UM/MUSHIE	No	Pos	Pos	NA	NA	NA	Pos	Pos	Neg	Neg	0	0	0	0	Pos	Pos	1+	1+	1+	1+	NA	0	28/06/2015	NA	177	Yes	15	Not ambiguous	Not ambiguous	2653	Pos	TRUE	C	Mobile	FALSE	0	0	0	0	1	1	1	1	Neg	Neg	Neg	Neg	Pos
C0080	UM/MUSHIE	No	Neg	Neg	Pos	NA	NA	Pos	Pos	Pos	Pos	0	0	1+	1+	Neg	Neg	0	0	0	0	NA	0	19/06/2015	NA	4	Yes	8	Not ambiguous	Not ambiguous	2654	Pos	TRUE	C	Mobile	FALSE	0	0	1	1	0	0	0	0	Neg	Neg	Pos	Pos	Neg
C00264	UM/MUSHIE	No	Pos	Neg	NA	NA	NA	Neg	Neg	Pos	Pos	1+	1+	1+	1+	Pos	Pos	1+	1+	1+	1+	NA	0	20/06/2015	42	7	Yes	24	Not ambiguous	Not ambiguous	2655	Pos	TRUE	C	Mobile	FALSE	1	1	1	1	1	1	1	1	Pos	Pos	Pos	Pos	Pos
C001160	UM/MUSHIE	No	Pos	Neg	NA	NA	NA	Neg	Neg	Pos	Pos	0	0	1+	1+	Pos	Pos	0	0	1+	1+	NA	0	22/06/2015	NA	3	Yes	47	Not ambiguous	Not ambiguous	2656	Pos	TRUE	C	Mobile	FALSE	0	0	1	1	0	0	1	1	Neg	Neg	Pos	Pos	Neg
C001209	UM/MUSHIE	No	Neg	Neg	Pos	NA	NA	Neg	Neg	Neg	Neg	0	0	0	0	Pos	Pos	1+	1+	1+	1+	NA	0	23/06/2015	NA	4	Yes	23	Not ambiguous	Not ambiguous	2657	Pos	TRUE	C	Mobile	FALSE	0	0	0	0	1	1	1	1	Neg	Neg	Neg	Neg	Pos
C001321	UM/MUSHIE	No	Pos	Neg	NA	NA	NA	Neg	Neg	Pos	Pos	1+	1+	1+	1+	Pos	Pos	1+	1+	1+	1+	NA	0	23/06/2015	38	3	Yes	60	Not ambiguous	Not ambiguous	2658	Pos	TRUE	C	Mobile	FALSE	1	1	1	1	1	1	1	1	Pos	Pos	Pos	Pos	Pos
C001554	UM/MUSHIE	No	Neg	Neg	Neg	Pos	NA	Neg	Neg	Neg	Neg	0	0	0	0	Pos	Pos	1+	1+	1+	1+	NA	0	24/06/2015	NA	29	Yes	44	Not ambiguous	Not ambiguous	2659	Pos	TRUE	C	Mobile	FALSE	0	0	0	0	1	1	1	1	Neg	Neg	Neg	Neg	Pos
C001262	UM/MUSHIE	Yes	NA	Neg	NA	NA	Pos	Neg	Neg	Pos	Pos	1+	1+	1+	1+	Pos	Pos	1+	1+	1+	1+	NA	0	23/06/2015	45	33	Yes	59	Not ambiguous	Not ambiguous	2660	Pos	TRUE	C	Mobile	FALSE	1	1	1	1	1	1	1	1	Pos	Pos	Pos	Pos	Pos
C002206	UM/MUSHIE	No	Pos	Neg	NA	NA	NA	Neg	Neg	Pos	Pos	1+	1+	1+	1+	Pos	Neg	1+	0	1+	0	NA	0	26/06/2015	20	5	Yes	14	Not ambiguous	Not ambiguous	2661	Pos	TRUE	C	Mobile	FALSE	1	1	1	1	1	0	1	0	Pos	Pos	Pos	Pos	Pos
C003282	UM/MUSHIE	No	Neg	Neg	Pos	NA	NA	Neg	Neg	Pos	Pos	1+	1+	1+	1+	Neg	Neg	0	0	0	0	NA	0	28/06/2015	45	3	Yes	66	Not ambiguous	Not ambiguous	2662	Pos	TRUE	C	Mobile	FALSE	1	1	1	1	0	0	0	0	Pos	Pos	Pos	Pos	Neg
C003810	UM/MUSHIE	Yes	Neg	Neg	Pos	NA	NA	Neg	Neg	Pos	Pos	1+	1+	1+	1+	Pos	Pos	1+	1+	1+	1+	NA	0	29/06/2015	28	3	Yes	54	Not ambiguous	Not ambiguous	2663	Pos	TRUE	C	Mobile	FALSE	1	1	1	1	1	1	1	1	Pos	Pos	Pos	Pos	Pos
C001	UM/MUSHIE	No	Pos	Neg	NA	NA	NA	Pos	Pos	Neg	Neg	0	0	0	0	Neg	Neg	0	0	0	0	NA	0	19/06/2015	NA	26	Yes	73	Not ambiguous	Not ambiguous	2664	Pos	TRUE	C	Mobile	FALSE	0	0	0	0	0	0	0	0	Neg	Neg	Neg	Neg	Neg
F010	HGR/KWAMOUTH	No	Pos	Neg	NA	NA	NA	Pos	Pos	Neg	Neg	0	0	0	0	Neg	Neg	0	0	0	0	NA	0	22/07/2015	NA	4	Yes	25	Not ambiguous	Not ambiguous	2665	Pos	TRUE	F	Fixed	FALSE	0	0	0	0	0	0	0	0	Neg	Neg	Neg	Neg	Neg
F151	HGR/KWAMOUTH	No	Neg	Neg	Pos	NA	NA	Neg	Neg	Pos	Pos	1+	1+	0	0	Pos	Pos	1+	0	0	3+	NA	0	31/07/2015	1	2	Yes	44	Not ambiguous	Not ambiguous	2666	Pos	TRUE	F	Fixed	FALSE	1	1	0	0	1	0	0	1	Pos	Pos	Neg	Neg	Pos
M377	HS DE KITOY	No	Neg	NA	Neg	Neg	NA	Neg	Neg	Neg	Neg	0	0	0	0	Pos	Pos	2+	2+	2+	2+	NA	0	28/07/2015	NA	NA	Yes	32	Not ambiguous	Not ambiguous	2667	Neg	FALSE	M	Fixed	FALSE	0	0	0	0	1	1	1	1	Neg	Neg	Neg	Neg	Pos
M394	HS DE KITOY	No	Neg	NA	Neg	Neg	NA	Neg	Neg	Pos	Pos	2+	2+	1+	1+	Pos	Pos	0	0	2+	2+	NA	0	29/07/2015	NA	NA	Yes	23	Not ambiguous	Not ambiguous	2668	Neg	FALSE	M	Fixed	FALSE	1	1	1	1	0	0	1	1	Pos	Pos	Pos	Pos	Neg
Q166	HGR/YASA-BONGA	No	Neg	NA	Neg	Neg	Neg	Neg	Neg	Neg	Neg	0	0	0	0	Pos	Pos	1+	1+	1+	1+	NA	0	13/06/2015	NA	NA	Yes	35	Not ambiguous	Not ambiguous	2669	Neg	FALSE	Q	Fixed	FALSE	0	0	0	0	1	1	1	1	Neg	Neg	Neg	Neg	Pos
Q452	HGR/YASA-BONGA	No	Neg	NA	Neg	Neg	NA	Neg	Neg	Neg	Neg	0	0	0	0	Pos	Pos	1+	1+	1+	1+	NA	0	07/07/2015	NA	NA	Yes	2	Not ambiguous	Not ambiguous	2670	Neg	FALSE	Q	Fixed	FALSE	0	0	0	0	1	1	1	1	Neg	Neg	Neg	Neg	Pos
Q474	HGR/YASA-BONGA	No	Neg	NA	Neg	Neg	NA	Neg	Neg	Neg	Neg	0	0	0	0	Pos	Pos	0	0	1+	1+	NA	0	09/07/2015	NA	NA	Yes	62	Not ambiguous	Not ambiguous	2671	Neg	FALSE	Q	Fixed	FALSE	0	0	0	0	0	0	1	1	Neg	Neg	Neg	Neg	Neg
Q172	HGR/YASA-BONGA	No	Neg	NA	Neg	Neg	NA	Neg	Neg	Pos	Pos	1+	1+	2+	2+	Neg	Neg	0	0	0	0	NA	0	13/06/2015	5	NA	Yes	17	Not ambiguous	Not ambiguous	2673	Neg	FALSE	Q	Fixed	FALSE	1	1	1	1	0	0	0	0	Pos	Pos	Pos	Pos	Neg
F039	HGR/KWAMOUTH	No	Neg	Neg	Pos	NA	NA	Pos	Pos	Pos	Neg	1+	0	0	0	Pos	Pos	1+	1+	1+	2+	NA	0	23/07/2015	1	53	Yes	20	Not ambiguous	Not ambiguous	2674	Pos	TRUE	F	Fixed	FALSE	1	0	0	0	1	1	1	1	Pos	Neg	Neg	Neg	Pos
Q194	HGR/YASA-BONGA	No	Neg	NA	Neg	Neg	Neg	Neg	Neg	Pos	Pos	1+	1+	1+	1+	Pos	Pos	1+	2+	2+	2+	NA	0	16/06/2015	5	NA	Yes	29	Not ambiguous	Not ambiguous	2675	Neg	FALSE	Q	Fixed	FALSE	1	1	1	1	1	1	1	1	Pos	Pos	Pos	Pos	Pos
Q205	HGR YASA-BONGA	No	Neg	NA	Neg	Neg	NA	Neg	Neg	Neg	Neg	0	0	0	0	Pos	Pos	1+	1+	0	0	NA	0	17/06/2015	NA	NA	Yes	70	Not ambiguous	Not ambiguous	2676	Neg	FALSE	Q	Fixed	FALSE	0	0	0	0	1	1	0	0	Neg	Neg	Neg	Neg	Pos
Q212	HGR YASA-BONGA	No	Neg	NA	Neg	Neg	NA	Neg	Neg	Neg	Neg	0	0	0	0	Pos	Pos	2+	1+	0	0	NA	0	17/06/2015	NA	NA	Yes	23	Not ambiguous	Not ambiguous	2677	Neg	FALSE	Q	Fixed	FALSE	0	0	0	0	1	1	0	0	Neg	Neg	Neg	Neg	Pos
Q223	HGR YASA-BONGA	No	Neg	NA	Neg	Neg	NA	Pos	Pos	Neg	Neg	0	0	0	0	Neg	Neg	0	0	0	0	NA	0	18/06/2015	NA	NA	Yes	19	Not ambiguous	Not ambiguous	2678	Neg	FALSE	Q	Fixed	FALSE	0	0	0	0	0	0	0	0	Neg	Neg	Neg	Neg	Neg
Q232	HGR YASA-BONGA	No	Neg	NA	Neg	Neg	NA	Neg	Neg	Neg	Neg	0	0	0	0	Neg	Pos	0	1+	0	0	NA	0	18/06/2015	NA	NA	Yes	23	Not ambiguous	Not ambiguous	2679	Neg	FALSE	Q	Fixed	FALSE	0	0	0	0	0	1	0	0	Neg	Neg	Neg	Neg	Neg
Q250	HGR YASA-BONGA	No	Neg	NA	Neg	Neg	NA	Pos	Neg	Neg	Neg	0	0	0	0	Neg	Neg	0	0	0	0	NA	0	18/06/2015	NA	NA	Yes	28	Not ambiguous	Not ambiguous	2680	Neg	FALSE	Q	Fixed	FALSE	0	0	0	0	0	0	0	0	Neg	Neg	Neg	Neg	Neg
M369	HS DE KITOY	No	Neg	NA	Neg	Neg	NA	Pos	Pos	Pos	Pos	1+	1+	0	0	Pos	Pos	2+	2+	2+	2+	NA	0	28/07/2015	8	NA	Yes	43	Not ambiguous	Not ambiguous	2681	Neg	FALSE	M	Fixed	FALSE	1	1	0	0	1	1	1	1	Pos	Pos	Neg	Neg	Pos
Q387	HGR YASA-BONGA	No	Neg	NA	Neg	Neg	NA	Neg	Neg	Neg	Neg	0	0	0	0	Pos	Pos	1+	1+	0	0	NA	0	26/06/2015	NA	NA	Yes	30	Not ambiguous	Not ambiguous	2682	Neg	FALSE	Q	Fixed	FALSE	0	0	0	0	1	1	0	0	Neg	Neg	Neg	Neg	Pos
N182	MASAMUNA	No	Neg	NA	Neg	Neg	NA	Neg	Neg	Neg	Neg	0	0	0	0	Pos	Pos	0	0	2+	2+	NA	0	09/06/2015	NA	NA	Yes	29	Not ambiguous	Not ambiguous	2684	Neg	FALSE	N	Fixed	FALSE	0	0	0	0	0	0	1	1	Neg	Neg	Neg	Neg	Neg
N181	MASAMUNA	No	Neg	NA	Neg	Neg	NA	Neg	Neg	Pos	Pos	1+	1+	0	0	Neg	Neg	0	0	0	0	NA	0	09/06/2015	2	NA	Yes	28	Not ambiguous	Not ambiguous	2685	Neg	FALSE	N	Fixed	FALSE	1	1	0	0	0	0	0	0	Pos	Pos	Neg	Neg	Neg
N235	MASAMUNA	No	Neg	NA	Neg	Neg	NA	Pos	Pos	Neg	Neg	0	0	0	0	Neg	Neg	0	0	0	0	NA	0	15/06/2015	NA	NA	Yes	2	Not ambiguous	Not ambiguous	2686	Neg	FALSE	N	Fixed	FALSE	0	0	0	0	0	0	0	0	Neg	Neg	Neg	Neg	Neg
N170	MASAMUNA	No	Neg	NA	Neg	Neg	NA	Neg	Neg	Neg	Neg	0	0	0	0	Pos	Pos	0	0	2+	2+	NA	0	08/06/2015	NA	NA	Yes	3	Not ambiguous	Not ambiguous	2687	Neg	FALSE	N	Fixed	FALSE	0	0	0	0	0	0	1	1	Neg	Neg	Neg	Neg	Neg
N239	MASAMUNA	No	Neg	NA	Neg	Neg	NA	Neg	Neg	Neg	Neg	0	0	0	0	Pos	Pos	0	0	2+	2+	NA	0	15/06/2015	NA	NA	Yes	61	Not ambiguous	Not ambiguous	2688	Neg	FALSE	N	Fixed	FALSE	0	0	0	0	0	0	1	1	Neg	Neg	Neg	Neg	Neg
N164	MASAMUNA	No	Neg	NA	Neg	Neg	NA	Neg	Neg	Neg	Neg	0	0	0	0	Pos	Pos	2+	2+	0	0	NA	0	08/06/2015	NA	NA	Yes	50	Not ambiguous	Not ambiguous	2689	Neg	FALSE	N	Fixed	FALSE	0	0	0	0	1	1	0	0	Neg	Neg	Neg	Neg	Pos
N258	MASAMUNA	No	Neg	NA	Neg	Neg	NA	Neg	Neg	Neg	Neg	0	0	0	0	Pos	Pos	0	0	2+	2+	NA	0	16/06/2015	NA	NA	Yes	36	Not ambiguous	Not ambiguous	2690	Neg	FALSE	N	Fixed	FALSE	0	0	0	0	0	0	1	1	Neg	Neg	Neg	Neg	Neg
N161	MASAMUNA	No	Neg	NA	Neg	Neg	NA	Pos	Pos	Neg	Neg	0	0	0	0	Neg	Neg	0	0	0	0	NA	0	08/06/2015	NA	NA	Yes	5	Not ambiguous	Not ambiguous	2691	Neg	FALSE	N	Fixed	FALSE	0	0	0	0	0	0	0	0	Neg	Neg	Neg	Neg	Neg
N160	MASAMUNA	No	Neg	NA	Neg	Neg	NA	Pos	Pos	Neg	Neg	0	0	0	0	Pos	Pos	2+	2+	2+	2+	NA	0	08/06/2015	NA	NA	Yes	45	Not ambiguous	Not ambiguous	2692	Neg	FALSE	N	Fixed	FALSE	0	0	0	0	1	1	1	1	Neg	Neg	Neg	Neg	Pos
N275	MASAMUNA	No	Neg	NA	Neg	Neg	NA	Neg	Neg	Neg	Neg	0	0	0	0	Pos	Pos	0	0	2+	2+	NA	0	16/06/2015	NA	NA	Yes	23	Not ambiguous	Not ambiguous	2693	Neg	FALSE	N	Fixed	FALSE	0	0	0	0	0	0	1	1	Neg	Neg	Neg	Neg	Neg
N159	MASAMUNA	No	Neg	NA	Neg	Neg	NA	Neg	Neg	Neg	Neg	0	0	0	0	Pos	Pos	0	0	2+	2+	NA	0	08/06/2015	NA	NA	Yes	50	Not ambiguous	Not ambiguous	2694	Neg	FALSE	N	Fixed	FALSE	0	0	0	0	0	0	1	1	Neg	Neg	Neg	Neg	Neg
N276	MASAMUNA	No	Neg	NA	Neg	Neg	NA	Neg	Neg	Neg	Neg	0	0	0	0	Pos	Pos	0	0	2+	2+	NA	0	16/06/2015	NA	NA	Yes	18	Not ambiguous	Not ambiguous	2695	Neg	FALSE	N	Fixed	FALSE	0	0	0	0	0	0	1	1	Neg	Neg	Neg	Neg	Neg
N158	MASAMUNA	No	Neg	NA	Neg	Neg	NA	Neg	Neg	Pos	Pos	1+	1+	2+	2+	Neg	Neg	0	0	0	0	NA	0	08/06/2015	2	NA	Yes	25	Not ambiguous	Not ambiguous	2696	Neg	FALSE	N	Fixed	FALSE	1	1	1	1	0	0	0	0	Pos	Pos	Pos	Pos	Neg
N156	MASAMUNA	No	Neg	NA	Neg	Neg	NA	Pos	Pos	Neg	Neg	0	0	0	0	Neg	Neg	0	0	0	0	NA	0	08/06/2015	NA	NA	Yes	27	Not ambiguous	Not ambiguous	2697	Neg	FALSE	N	Fixed	FALSE	0	0	0	0	0	0	0	0	Neg	Neg	Neg	Neg	Neg
N324	MASAMUNA	No	Neg	NA	Neg	Neg	NA	Pos	Pos	Pos	Pos	2+	2+	2+	2+	Pos	Pos	2+	2+	0	0	NA	0	22/06/2015	NA	NA	Yes	3	Not ambiguous	Not ambiguous	2698	Neg	FALSE	N	Fixed	FALSE	1	1	1	1	1	1	0	0	Pos	Pos	Pos	Pos	Pos
N152	MASAMUNA	No	Neg	NA	Neg	Neg	NA	Pos	Pos	Neg	Neg	0	0	0	0	Neg	Neg	0	0	0	0	NA	0	06/06/2015	NA	NA	Yes	21	Not ambiguous	Not ambiguous	2699	Neg	FALSE	N	Fixed	FALSE	0	0	0	0	0	0	0	0	Neg	Neg	Neg	Neg	Neg
N184	MASAMUNA	No	Neg	NA	Neg	Neg	NA	Neg	Neg	Neg	Neg	0	0	0	0	Pos	Pos	2+	2+	2+	2+	NA	0	09/06/2015	NA	NA	Yes	61	Not ambiguous	Not ambiguous	2700	Neg	FALSE	N	Fixed	FALSE	0	0	0	0	1	1	1	1	Neg	Neg	Neg	Neg	Pos
N141	MASAMUNA	No	Neg	NA	Neg	Neg	NA	Neg	Neg	Neg	Neg	0	0	0	0	Pos	Pos	0	0	1+	1+	NA	0	04/06/2015	NA	NA	Yes	28	Not ambiguous	Not ambiguous	2701	Neg	FALSE	N	Fixed	FALSE	0	0	0	0	0	0	1	1	Neg	Neg	Neg	Neg	Neg
N210	MASAMUNA	No	Neg	NA	Neg	Neg	NA	Pos	Pos	Pos	Pos	2+	2+	2+	2+	Neg	Neg	0	0	0	0	NA	0	11/06/2015	NA	NA	Yes	20	Not ambiguous	Not ambiguous	2702	Neg	FALSE	N	Fixed	FALSE	1	1	1	1	0	0	0	0	Pos	Pos	Pos	Pos	Neg
N119	MASAMUNA	No	Neg	NA	Neg	Neg	NA	Neg	Neg	Neg	Neg	0	0	0	0	Pos	Pos	2+	2+	3+	3+	NA	0	02/06/2015	NA	NA	Yes	25	Not ambiguous	Not ambiguous	2703	Neg	FALSE	N	Fixed	FALSE	0	0	0	0	1	1	1	1	Neg	Neg	Neg	Neg	Pos
N213	MASAMUNA	No	Neg	NA	Neg	Neg	NA	Pos	Pos	Neg	Neg	0	0	0	0	Neg	Neg	0	0	0	0	NA	0	11/06/2015	NA	NA	Yes	8	Ambiguous	Ambiguous	2704	Neg	FALSE	N	Fixed	FALSE	0	0	0	0	0	0	0	0	Neg	Neg	Neg	Neg	Neg
N114	MASAMUNA	No	Neg	NA	Neg	Neg	NA	Pos	Pos	Pos	Pos	2+	2+	0	0	Pos	Pos	2+	2+	2+	2+	NA	0	02/06/2015	NA	NA	Yes	22	Ambiguous	Ambiguous	2705	Neg	FALSE	N	Fixed	FALSE	1	1	0	0	1	1	1	1	Pos	Pos	Neg	Neg	Pos
N032	MASAMUNA	No	Neg	NA	Neg	Neg	NA	Neg	Neg	Neg	Neg	0	0	0	0	Pos	Pos	2+	2+	0	0	NA	0	28/05/2015	NA	NA	Yes	34	Not ambiguous	Not ambiguous	2706	Neg	FALSE	N	Fixed	FALSE	0	0	0	0	1	1	0	0	Neg	Neg	Neg	Neg	Pos
N041	MASAMUNA	No	Neg	NA	Neg	Neg	NA	Neg	Neg	Neg	Neg	0	0	0	0	Pos	Pos	0	0	3+	3+	NA	0	28/05/2015	NA	NA	Yes	44	Not ambiguous	Not ambiguous	2707	Neg	FALSE	N	Fixed	FALSE	0	0	0	0	0	0	1	1	Neg	Neg	Neg	Neg	Neg
N048	MASAMUNA	No	Neg	NA	Neg	Neg	NA	Neg	Neg	Pos	Pos	1+	1+	0	0	Neg	Neg	0	0	0	0	NA	0	28/05/2015	2	NA	Yes	31	Not ambiguous	Not ambiguous	2708	Neg	FALSE	N	Fixed	FALSE	1	1	0	0	0	0	0	0	Pos	Pos	Neg	Neg	Neg
N218	MASAMUNA	No	Neg	NA	Neg	Neg	NA	Pos	Pos	Neg	Neg	0	0	0	0	Neg	Neg	0	0	0	0	NA	0	12/06/2015	NA	NA	Yes	31	Not ambiguous	Not ambiguous	2709	Neg	FALSE	N	Fixed	FALSE	0	0	0	0	0	0	0	0	Neg	Neg	Neg	Neg	Neg
N051	MASAMUNA	No	Neg	NA	Neg	Neg	NA	Neg	Neg	Neg	Neg	0	0	0	0	Pos	Pos	1+	1+	0	0	NA	0	28/05/2015	NA	NA	Yes	4	Not ambiguous	Not ambiguous	2710	Neg	FALSE	N	Fixed	FALSE	0	0	0	0	1	1	0	0	Neg	Neg	Neg	Neg	Pos
N685	MASAMUNA	No	Neg	NA	Neg	Neg	NA	Neg	Neg	Neg	Neg	0	0	0	0	Pos	Pos	1+	1+	0	0	NA	0	14/08/2015	NA	NA	Yes	3	Not ambiguous	Not ambiguous	2711	Neg	FALSE	N	Fixed	FALSE	0	0	0	0	1	1	0	0	Neg	Neg	Neg	Neg	Pos
N075	MASAMUNA	No	Neg	NA	Neg	Neg	NA	Pos	Pos	Neg	Neg	0	0	0	0	Pos	Pos	2+	2+	0	0	NA	0	29/05/2015	NA	NA	Yes	32	Ambiguous	Ambiguous	2712	Neg	FALSE	N	Fixed	FALSE	0	0	0	0	1	1	0	0	Neg	Neg	Neg	Neg	Pos
N690	MASAMUNA	No	Neg	NA	Neg	Neg	NA	Neg	Neg	Neg	Neg	0	0	0	0	Pos	Pos	2+	2+	0	0	NA	0	15/08/2015	NA	NA	Yes	37	Not ambiguous	Not ambiguous	2713	Neg	FALSE	N	Fixed	FALSE	0	0	0	0	1	1	0	0	Neg	Neg	Neg	Neg	Pos
N086	MASAMUNA	No	Neg	NA	Neg	Neg	Neg	Neg	Neg	Neg	Neg	0	0	0	0	Pos	Pos	1+	1+	0	0	NA	0	30/05/2015	NA	NA	Yes	5	Not ambiguous	Not ambiguous	2714	Neg	FALSE	N	Fixed	FALSE	0	0	0	0	1	1	0	0	Neg	Neg	Neg	Neg	Pos
N092	MASAMUNA	No	Neg	NA	Neg	Neg	NA	Pos	Pos	Neg	Neg	0	0	0	0	Neg	Neg	0	0	0	0	NA	0	01/06/2015	NA	NA	Yes	50	Not ambiguous	Not ambiguous	2715	Neg	FALSE	N	Fixed	FALSE	0	0	0	0	0	0	0	0	Neg	Neg	Neg	Neg	Neg
N691	MASAMUNA	No	Neg	NA	Neg	Neg	NA	Pos	Pos	Neg	Neg	0	0	0	0	Pos	Pos	2+	2+	0	0	NA	0	15/08/2015	NA	NA	Yes	40	Not ambiguous	Not ambiguous	2716	Neg	FALSE	N	Fixed	FALSE	0	0	0	0	1	1	0	0	Neg	Neg	Neg	Neg	Pos
N093	MASAMUNA	No	Neg	NA	Neg	Neg	NA	Neg	Neg	Neg	Neg	0	0	0	0	Pos	Pos	3+	1+	0	0	NA	0	01/06/2015	NA	NA	Yes	44	Not ambiguous	Not ambiguous	2717	Neg	FALSE	N	Fixed	FALSE	0	0	0	0	1	1	0	0	Neg	Neg	Neg	Neg	Pos
N094	MASAMUNA	No	Neg	NA	Neg	Neg	NA	Neg	Neg	Pos	Pos	2+	2+	2+	2+	Neg	Neg	0	0	0	0	NA	0	01/06/2015	NA	NA	Yes	30	Not ambiguous	Not ambiguous	2719	Neg	FALSE	N	Fixed	FALSE	1	1	1	1	0	0	0	0	Pos	Pos	Pos	Pos	Neg
N648	MASAMUNA	No	Neg	NA	Neg	Neg	NA	Pos	Pos	Pos	Pos	2+	2+	1+	1+	Neg	Neg	0	0	0	0	NA	0	04/08/2015	NA	NA	Yes	43	Ambiguous	Ambiguous	2720	Neg	FALSE	N	Fixed	FALSE	1	1	1	1	0	0	0	0	Pos	Pos	Pos	Pos	Neg
N033	MASAMUNA	No	Neg	NA	Neg	Neg	NA	Pos	Pos	Pos	Pos	2+	2+	0	0	Pos	Pos	3+	3+	0	0	NA	0	27/05/2015	NA	NA	Yes	27	Not ambiguous	Not ambiguous	2722	Neg	FALSE	N	Fixed	FALSE	1	1	0	0	1	1	0	0	Pos	Pos	Neg	Neg	Pos
N020	MASAMUNA	No	Neg	NA	Neg	Neg	NA	Neg	Neg	Pos	Pos	2+	2+	0	0	Neg	Neg	0	0	0	0	NA	0	27/05/2015	NA	NA	Yes	36	Not ambiguous	Not ambiguous	2724	Neg	FALSE	N	Fixed	FALSE	1	1	0	0	0	0	0	0	Pos	Pos	Neg	Neg	Neg
M488	HS DE KITOY	No	Neg	NA	Neg	Neg	NA	Neg	Neg	Neg	Neg	0	0	0	0	Pos	Pos	2+	2+	0	0	NA	0	03/08/2015	NA	NA	Yes	40	Not ambiguous	Not ambiguous	2725	Neg	FALSE	M	Fixed	FALSE	0	0	0	0	1	1	0	0	Neg	Neg	Neg	Neg	Pos
N618	MASAMUNA	No	Neg	NA	Neg	Neg	NA	Neg	Neg	Pos	Pos	1+	1+	1+	1+	Neg	Neg	0	0	0	0	NA	0	30/07/2015	2	NA	Yes	38	Not ambiguous	Not ambiguous	2726	Neg	FALSE	N	Fixed	FALSE	1	1	1	1	0	0	0	0	Pos	Pos	Pos	Pos	Neg
N030	MASAMUNA	No	Neg	NA	Neg	Neg	NA	Pos	Pos	Neg	Neg	0	0	0	0	Pos	Pos	0	0	3+	3+	NA	0	27/05/2015	NA	NA	Yes	38	Not ambiguous	Not ambiguous	2727	Neg	FALSE	N	Fixed	FALSE	0	0	0	0	0	0	1	1	Neg	Neg	Neg	Neg	Neg
M480	HS DE KITOY	No	Neg	NA	Neg	Neg	NA	Neg	Neg	Pos	Pos	1+	1+	0	0	Neg	Neg	0	0	0	0	NA	0	03/08/2015	3	NA	Yes	25	Not ambiguous	Not ambiguous	2728	Neg	FALSE	M	Fixed	FALSE	1	1	0	0	0	0	0	0	Pos	Pos	Neg	Neg	Neg
M066	HS DE KITOY	No	Neg	NA	Neg	Neg	NA	Neg	Neg	Pos	Pos	1+	1+	1+	1+	Neg	Neg	0	0	0	0	NA	0	15/06/2015	11	NA	Yes	23	Not ambiguous	Not ambiguous	2729	Neg	FALSE	M	Fixed	FALSE	1	1	1	1	0	0	0	0	Pos	Pos	Pos	Pos	Neg
N003	MASAMUNA	No	Neg	NA	Neg	Neg	NA	Neg	Neg	Neg	Neg	0	0	0	0	Pos	Pos	2+	2+	0	0	NA	0	26/05/2015	NA	NA	Yes	32	Not ambiguous	Not ambiguous	2730	Neg	FALSE	N	Fixed	FALSE	0	0	0	0	1	1	0	0	Neg	Neg	Neg	Neg	Pos
N010	MASAMUNA	No	Neg	NA	Neg	Neg	NA	Pos	Pos	Neg	Neg	0	0	0	0	Neg	Neg	0	0	0	0	NA	0	27/05/2015	NA	NA	Yes	6	Not ambiguous	Not ambiguous	2732	Neg	FALSE	N	Fixed	FALSE	0	0	0	0	0	0	0	0	Neg	Neg	Neg	Neg	Neg
M447	HS DE KITOY	No	Neg	NA	Neg	Neg	NA	Pos	Pos	Neg	Neg	0	0	0	0	Neg	Neg	0	0	0	0	NA	0	31/07/2015	NA	NA	Yes	21	Not ambiguous	Not ambiguous	2733	Neg	FALSE	M	Fixed	FALSE	0	0	0	0	0	0	0	0	Neg	Neg	Neg	Neg	Neg
N624	MASAMUNA	No	Neg	NA	Neg	Neg	NA	Neg	Neg	Neg	Neg	0	0	0	0	Pos	Pos	2+	2+	2+	2+	NA	0	31/07/2015	NA	NA	Yes	16	Not ambiguous	Not ambiguous	2735	Neg	FALSE	N	Fixed	FALSE	0	0	0	0	1	1	1	1	Neg	Neg	Neg	Neg	Pos
N007	MASAMUNA	No	Neg	NA	Neg	Neg	NA	Pos	Pos	Pos	Pos	3+	3+	0	0	Neg	Neg	0	0	0	0	NA	0	26/05/2015	NA	NA	Yes	16	Not ambiguous	Not ambiguous	2736	Neg	FALSE	N	Fixed	FALSE	1	1	0	0	0	0	0	0	Pos	Pos	Neg	Neg	Neg
N647	MASAMUNA	No	Neg	NA	Neg	Neg	NA	Neg	Neg	Neg	Neg	0	0	0	0	Neg	Neg	0	0	0	0	NA	0	04/08/2015	NA	NA	Yes	22	Not ambiguous	Not ambiguous	2737	Neg	FALSE	N	Fixed	FALSE	0	0	0	0	0	0	0	0	Neg	Neg	Neg	Neg	Neg
M420	HS DE KITOY	No	Neg	NA	Neg	Neg	NA	Neg	Neg	Neg	Neg	0	0	0	0	Pos	Pos	0	0	2+	2+	NA	0	30/07/2015	NA	NA	Yes	39	Not ambiguous	Not ambiguous	2738	Neg	FALSE	M	Fixed	FALSE	0	0	0	0	0	0	1	1	Neg	Neg	Neg	Neg	Neg
Q454	HGR YASA BONGA	No	Neg	NA	Neg	Neg	NA	Neg	Neg	Pos	Pos	1+	1+	1+	1+	Neg	Neg	0	0	0	0	NA	0	08/07/2015	0.5	NA	Yes	34	Not ambiguous	Not ambiguous	2739	Neg	FALSE	Q	Fixed	FALSE	1	1	1	1	0	0	0	0	Pos	Pos	Pos	Pos	Neg
N037	MASAMUNA	No	Neg	NA	Neg	Neg	NA	Neg	Neg	Neg	Neg	0	0	0	0	Pos	Pos	3+	3+	0	0	NA	0	28/05/2015	NA	NA	Yes	35	Not ambiguous	Not ambiguous	2740	Neg	FALSE	N	Fixed	FALSE	0	0	0	0	1	1	0	0	Neg	Neg	Neg	Neg	Pos
N063	MASAMUNA	No	Neg	NA	Neg	Neg	NA	Neg	Neg	Neg	Neg	0	0	0	0	Pos	Pos	0	0	3+	3+	NA	0	29/05/2015	NA	NA	Yes	16	Not ambiguous	Not ambiguous	2742	Neg	FALSE	N	Fixed	FALSE	0	0	0	0	0	0	1	1	Neg	Neg	Neg	Neg	Neg
M411	HS DE KITOY	No	Neg	NA	Neg	Neg	NA	Neg	Neg	Pos	Pos	1+	1+	0	0	Pos	Pos	1+	1+	0	0	NA	0	30/07/2015	3	NA	Yes	14	Not ambiguous	Not ambiguous	2743	Neg	FALSE	M	Fixed	FALSE	1	1	0	0	1	1	0	0	Pos	Pos	Neg	Neg	Pos
M436	HS DE KITOY	No	Neg	NA	Neg	Neg	NA	Neg	Neg	Pos	Pos	1+	1+	1+	1+	Neg	Neg	0	0	0	0	NA	0	31/07/2015	4	NA	Yes	12	Not ambiguous	Not ambiguous	2744	Neg	FALSE	M	Fixed	FALSE	1	1	1	1	0	0	0	0	Pos	Pos	Pos	Pos	Neg
M397	HS DE KITOY	No	Neg	NA	Neg	Neg	NA	Neg	Neg	Pos	Pos	1+	1+	0	0	Pos	Pos	2+	2+	2+	2+	NA	0	29/07/2015	8	NA	Yes	23	Not ambiguous	Not ambiguous	2745	Neg	FALSE	M	Fixed	FALSE	1	1	0	0	1	1	1	1	Pos	Pos	Neg	Neg	Pos
M380	HS DE KITOY	No	Neg	NA	Neg	Neg	NA	Neg	Neg	Pos	Pos	1+	1+	0	0	Pos	Pos	1+	1+	0	0	NA	0	28/07/2015	2	NA	Yes	33	Not ambiguous	Not ambiguous	2746	Neg	FALSE	M	Fixed	FALSE	1	1	0	0	1	1	0	0	Pos	Pos	Neg	Neg	Pos
A1579	UM BANDUNDU	No	Neg	NA	Neg	Neg	NA	Neg	Neg	Neg	Neg	0	0	0	0	Pos	Pos	3+	2+	2+	2+	NA	0	26/06/2015	NA	NA	Yes	10	Not ambiguous	Not ambiguous	2749	Neg	FALSE	A	Mobile	FALSE	0	0	0	0	1	1	1	1	Neg	Neg	Neg	Neg	Pos
A1575	UM BANDUNDU	No	Neg	NA	Neg	Neg	NA	Pos	Pos	Neg	Neg	0	0	0	0	Neg	Neg	0	0	0	0	NA	0	26/06/2015	NA	NA	Yes	18	Not ambiguous	Not ambiguous	2750	Neg	FALSE	A	Mobile	FALSE	0	0	0	0	0	0	0	0	Neg	Neg	Neg	Neg	Neg
Q279	HGR YASA BONGA	No	Neg	NA	Neg	Neg	NA	Neg	Neg	Pos	Pos	1+	1+	0	0	Pos	Pos	1+	1+	3+	3+	NA	0	19/06/2015	0.25	NA	Yes	3	Not ambiguous	Not ambiguous	2751	Neg	FALSE	Q	Fixed	FALSE	1	1	0	0	1	1	1	1	Pos	Pos	Neg	Neg	Pos
A1570	UM BANDUNDU	No	Neg	NA	Neg	Neg	NA	Neg	Neg	Neg	Neg	0	0	0	0	Pos	Pos	2+	2+	3+	4+	NA	0	25/06/2015	NA	NA	Yes	19	Not ambiguous	Not ambiguous	2752	Neg	FALSE	A	Mobile	FALSE	0	0	0	0	1	1	1	1	Neg	Neg	Neg	Neg	Pos
Q225	HGR YASA BONGA	No	Neg	NA	Neg	Neg	NA	Pos	Pos	Neg	Neg	0	0	0	0	Neg	Neg	0	0	0	0	NA	0	18/06/2015	NA	NA	Yes	20	Not ambiguous	Not ambiguous	2754	Neg	FALSE	Q	Fixed	FALSE	0	0	0	0	0	0	0	0	Neg	Neg	Neg	Neg	Neg
A1576	UM BANDUNDU	No	Neg	NA	Neg	Neg	NA	Pos	Pos	Neg	Neg	0	0	0	0	Pos	Pos	0	0	3+	2+	NA	0	26/06/2015	NA	NA	Yes	4	Not ambiguous	Not ambiguous	2755	Neg	FALSE	A	Mobile	FALSE	0	0	0	0	0	0	1	1	Neg	Neg	Neg	Neg	Neg
Q202	HGR YASA BONGA	No	Neg	NA	Neg	Neg	NA	Neg	Neg	Pos	Pos	1+	1+	0	0	Neg	Neg	0	0	0	0	NA	0	17/06/2015	0.5	NA	Yes	34	Not ambiguous	Not ambiguous	2756	Neg	FALSE	Q	Fixed	FALSE	1	1	0	0	0	0	0	0	Pos	Pos	Neg	Neg	Neg
N131	MASAMUNA	No	Neg	NA	Neg	Neg	NA	Neg	Neg	Neg	Neg	0	0	0	0	Pos	Pos	1+	1+	2+	2+	NA	0	03/06/2015	NA	NA	Yes	52	Not ambiguous	Not ambiguous	2758	Neg	FALSE	N	Fixed	FALSE	0	0	0	0	1	1	1	1	Neg	Neg	Neg	Neg	Pos
N280	MASAMUNA	No	Neg	NA	Neg	Neg	NA	Neg	Neg	Pos	Pos	1+	1+	2+	2+	Neg	Neg	0	0	0	0	NA	0	16/06/2015	2	NA	Yes	33	Not ambiguous	Not ambiguous	2759	Neg	FALSE	N	Fixed	FALSE	1	1	1	1	0	0	0	0	Pos	Pos	Pos	Pos	Neg
N286	MASAMUNA	No	Neg	NA	Neg	Neg	NA	Neg	Neg	Neg	Neg	0	0	0	0	Neg	Neg	0	0	0	0	NA	0	17/06/2015	NA	NA	Yes	9	Not ambiguous	Not ambiguous	2760	Neg	FALSE	N	Fixed	FALSE	0	0	0	0	0	0	0	0	Neg	Neg	Neg	Neg	Neg
N396	MASAMUNA	No	Neg	NA	Neg	Neg	NA	Pos	Pos	Pos	Pos	1+	1+	1+	1+	Pos	Pos	2+	2+	2+	2+	NA	0	01/07/2015	1	NA	Yes	33	Not ambiguous	Not ambiguous	2761	Neg	FALSE	N	Fixed	FALSE	1	1	1	1	1	1	1	1	Pos	Pos	Pos	Pos	Pos
N477	MASAMUNA	No	Neg	NA	Neg	Neg	NA	Neg	Neg	Neg	Neg	0	0	0	0	Neg	Neg	0	0	0	0	NA	0	13/07/2015	NA	NA	Yes	20	Not ambiguous	Not ambiguous	2762	Neg	FALSE	N	Fixed	FALSE	0	0	0	0	0	0	0	0	Neg	Neg	Neg	Neg	Neg
N547	MASAMUNA	No	Neg	NA	Neg	Neg	NA	Neg	Neg	Pos	Pos	2+	2+	0	0	Neg	Neg	0	0	0	0	NA	0	21/07/2015	NA	NA	Yes	19	Not ambiguous	Not ambiguous	2763	Neg	FALSE	N	Fixed	FALSE	1	1	0	0	0	0	0	0	Pos	Pos	Neg	Neg	Neg
N446	MASAMUNA	No	Neg	NA	Neg	Neg	NA	Neg	Neg	Pos	Pos	0	0	1+	1+	Neg	Neg	0	0	0	0	NA	0	07/07/2015	NA	NA	Yes	19	Not ambiguous	Not ambiguous	2764	Neg	FALSE	N	Fixed	FALSE	0	0	1	1	0	0	0	0	Neg	Neg	Pos	Pos	Neg
N534	MASAMUNA	No	Neg	NA	Neg	Neg	NA	Neg	Neg	Pos	Pos	2+	2+	2+	2+	Neg	Neg	0	0	0	0	NA	0	21/07/2015	NA	NA	Yes	25	Not ambiguous	Not ambiguous	2765	Neg	FALSE	N	Fixed	FALSE	1	1	1	1	0	0	0	0	Pos	Pos	Pos	Pos	Neg
N543	MASAMUNA	No	Neg	NA	Neg	Neg	NA	Neg	Neg	Pos	Pos	0	0	1+	1+	Neg	Neg	0	0	0	0	NA	0	21/07/2015	NA	NA	Yes	22	Not ambiguous	Not ambiguous	2766	Neg	FALSE	N	Fixed	FALSE	0	0	1	1	0	0	0	0	Neg	Neg	Pos	Pos	Neg
N475	MASAMUNA	No	Neg	NA	Neg	Neg	NA	Neg	Neg	Neg	Neg	0	0	0	0	Pos	Pos	2+	2+	0	0	NA	0	13/07/2015	NA	NA	Yes	6	Not ambiguous	Not ambiguous	2767	Neg	FALSE	N	Fixed	FALSE	0	0	0	0	1	1	0	0	Neg	Neg	Neg	Neg	Pos
N561	MASAMUNA	No	Neg	NA	Neg	Neg	NA	Neg	Neg	Neg	Neg	0	0	0	0	Pos	Pos	1+	1+	2+	2+	NA	0	22/07/2015	NA	NA	Yes	29	Not ambiguous	Not ambiguous	2768	Neg	FALSE	N	Fixed	FALSE	0	0	0	0	1	1	1	1	Neg	Neg	Neg	Neg	Pos
N497	MASAMUNA	No	Neg	NA	Neg	Neg	NA	Pos	Pos	Pos	Pos	1+	1+	0	0	Neg	Neg	0	0	0	0	NA	0	15/07/2015	2	NA	Yes	44	Not ambiguous	Not ambiguous	2770	Neg	FALSE	N	Fixed	FALSE	1	1	0	0	0	0	0	0	Pos	Pos	Neg	Neg	Neg
N611	MASAMUNA	No	Neg	NA	Neg	Neg	NA	Pos	Pos	Pos	Pos	1+	1+	0	0	Neg	Neg	0	0	0	0	NA	0	29/07/2015	1	NA	Yes	4	Not ambiguous	Not ambiguous	2772	Neg	FALSE	N	Fixed	FALSE	1	1	0	0	0	0	0	0	Pos	Pos	Neg	Neg	Neg
N517	MASAMUNA	No	Neg	NA	Neg	Neg	Neg	Pos	Pos	Pos	Pos	1+	1+	2+	2+	Pos	Pos	0	0	2+	2+	NA	0	20/07/2015	2	NA	Yes	21	Not ambiguous	Not ambiguous	2773	Neg	FALSE	N	Fixed	FALSE	1	1	1	1	0	0	1	1	Pos	Pos	Pos	Pos	Neg
N614	MASAMUNA	No	Neg	NA	Neg	Neg	NA	Neg	Neg	Pos	Pos	2+	2+	0	2+	Neg	Neg	0	0	0	0	NA	0	29/07/2015	NA	NA	Yes	24	Not ambiguous	Not ambiguous	2774	Neg	FALSE	N	Fixed	FALSE	1	1	0	1	0	0	0	0	Pos	Pos	Neg	Pos	Neg
N518	MASAMUNA	No	Neg	NA	Neg	Neg	NA	Neg	Neg	Pos	Pos	1+	1+	0	0	Neg	Neg	0	0	0	0	NA	0	20/07/2015	2	NA	Yes	2	Not ambiguous	Not ambiguous	2776	Neg	FALSE	N	Fixed	FALSE	1	1	0	0	0	0	0	0	Pos	Pos	Neg	Neg	Neg
N385	MASAMUNA	No	Neg	NA	Neg	Neg	NA	Neg	Neg	Pos	Pos	0	0	2+	2+	Neg	Neg	0	0	0	0	NA	0	01/07/2015	NA	NA	Yes	32	Not ambiguous	Not ambiguous	2777	Neg	FALSE	N	Fixed	FALSE	0	0	1	1	0	0	0	0	Neg	Neg	Pos	Pos	Neg
A1571	UM BANDUNDU	No	Neg	NA	Neg	Neg	NA	Pos	Pos	Neg	Neg	0	0	0	0	Pos	Pos	2+	2+	0	0	NA	0	26/06/2015	NA	NA	Yes	56	Not ambiguous	Not ambiguous	2778	Neg	FALSE	A	Mobile	FALSE	0	0	0	0	1	1	0	0	Neg	Neg	Neg	Neg	Pos
N325	MASAMUNA	No	Neg	NA	Neg	Neg	NA	Neg	Neg	Pos	Pos	2+	2+	0	0	Neg	Neg	0	0	0	0	NA	0	22/06/2015	NA	NA	Yes	68	Not ambiguous	Not ambiguous	2780	Neg	FALSE	N	Fixed	FALSE	1	1	0	0	0	0	0	0	Pos	Pos	Neg	Neg	Neg
N382	MASAMUNA	No	Neg	NA	Neg	Neg	NA	Neg	Neg	Pos	Pos	1+	1+	0	0	Neg	Neg	0	0	0	0	NA	0	01/07/2015	1	NA	Yes	50	Not ambiguous	Not ambiguous	2781	Neg	FALSE	N	Fixed	FALSE	1	1	0	0	0	0	0	0	Pos	Pos	Neg	Neg	Neg
N326	MASAMUNA	No	Neg	NA	Neg	Neg	NA	Neg	Neg	Pos	Pos	0	0	2+	2+	Neg	Neg	0	0	0	0	NA	0	22/06/2015	NA	NA	Yes	9	Not ambiguous	Not ambiguous	2782	Neg	FALSE	N	Fixed	FALSE	0	0	1	1	0	0	0	0	Neg	Neg	Pos	Pos	Neg
N406	MASAMUNA	No	Neg	NA	Neg	Neg	NA	Neg	Neg	Neg	Neg	0	0	0	0	Pos	Pos	0	0	2+	2+	NA	0	02/07/2015	NA	NA	Yes	38	Not ambiguous	Not ambiguous	2785	Neg	FALSE	N	Fixed	FALSE	0	0	0	0	0	0	1	1	Neg	Neg	Neg	Neg	Neg
N331	MASAMUNA	No	Neg	NA	Neg	Neg	NA	Neg	Neg	Pos	Pos	2+	2+	0	0	Neg	Neg	0	0	0	0	NA	0	23/06/2015	NA	NA	Yes	26	Not ambiguous	Not ambiguous	2786	Neg	FALSE	N	Fixed	FALSE	1	1	0	0	0	0	0	0	Pos	Pos	Neg	Neg	Neg
N407	MASAMUNA	No	Neg	NA	Neg	Neg	NA	Pos	Pos	Pos	Pos	1+	1+	0	0	Pos	Pos	0	0	1+	1+	NA	0	03/07/2015	2	NA	Yes	23	Ambiguous	Ambiguous	2787	Neg	FALSE	N	Fixed	FALSE	1	1	0	0	0	0	1	1	Pos	Pos	Neg	Neg	Neg
N412	MASAMUNA	No	Neg	NA	Neg	Neg	NA	Neg	Neg	Pos	Pos	1+	1+	1+	1+	Neg	Neg	0	0	0	0	NA	0	06/07/2015	2	NA	Yes	26	Not ambiguous	Not ambiguous	2789	Neg	FALSE	N	Fixed	FALSE	1	1	1	1	0	0	0	0	Pos	Pos	Pos	Pos	Neg
M509	HS DE KITOY	No	Neg	NA	Neg	Neg	NA	Neg	Pos	Pos	Pos	1+	1+	0	0	Pos	Pos	0	0	1+	1+	NA	0	04/08/2015	8	NA	Yes	4	Not ambiguous	Ambiguous	2790	Neg	FALSE	M	Fixed	FALSE	1	1	0	0	0	0	1	1	Pos	Pos	Neg	Neg	Neg
A1560	UM/BDD	No	Neg	NA	Neg	Neg	NA	Neg	Neg	Neg	Neg	0	0	0	0	Pos	Pos	2+	1+	0	2+	NA	0	26/06/2015	NA	NA	Yes	16	Not ambiguous	Not ambiguous	2791	Neg	FALSE	A	Mobile	FALSE	0	0	0	0	1	1	0	1	Neg	Neg	Neg	Neg	Pos
M493	HS DE KITOY	No	Neg	NA	Neg	Neg	NA	Neg	Neg	Neg	Neg	0	0	0	0	Pos	Pos	2+	2+	2+	2+	NA	0	03/08/2015	NA	NA	Yes	38	Not ambiguous	Not ambiguous	2792	Neg	FALSE	M	Fixed	FALSE	0	0	0	0	1	1	1	1	Neg	Neg	Neg	Neg	Pos
J396	HGR/BAGATA	No	Neg	NA	Neg	Neg	NA	Neg	Neg	Pos	Pos	2+	2+	0	0	Neg	Neg	0	0	0	0	NA	0	03/08/2015	NA	NA	Yes	59	Not ambiguous	Not ambiguous	2793	Neg	FALSE	J	Fixed	FALSE	1	1	0	0	0	0	0	0	Pos	Pos	Neg	Neg	Neg
M491	HS DE KITOY	No	Neg	NA	Neg	Neg	NA	Neg	Neg	Pos	Pos	1+	1+	1+	1+	Pos	Pos	2+	2+	0	0	NA	0	03/08/2015	5	NA	Yes	27	Not ambiguous	Not ambiguous	2794	Neg	FALSE	M	Fixed	FALSE	1	1	1	1	1	1	0	0	Pos	Pos	Pos	Pos	Pos
J339	HGR/BAGATA	No	Neg	NA	Neg	Neg	NA	Neg	Neg	Neg	Neg	0	0	0	0	Pos	Pos	0	0	2+	2+	NA	0	27/07/2015	NA	NA	Yes	29	Not ambiguous	Not ambiguous	2795	Neg	FALSE	J	Fixed	FALSE	0	0	0	0	0	0	1	1	Neg	Neg	Neg	Neg	Neg
M487	HS DE KITOY	No	Neg	NA	Neg	Neg	NA	Neg	Neg	Neg	Neg	0	0	0	0	Pos	Pos	1+	1+	1+	1+	NA	0	03/08/2015	NA	NA	Yes	7	Not ambiguous	Not ambiguous	2796	Neg	FALSE	M	Fixed	FALSE	0	0	0	0	1	1	1	1	Neg	Neg	Neg	Neg	Pos
J316	HGR/BAGATA	No	Neg	NA	Neg	Neg	NA	Neg	Neg	Pos	Neg	2+	0	0	0	Neg	Neg	0	0	0	0	NA	0	24/07/2015	NA	NA	Yes	25	Not ambiguous	Not ambiguous	2797	Neg	FALSE	J	Fixed	FALSE	1	0	0	0	0	0	0	0	Pos	Neg	Neg	Neg	Neg
M476	HS DE KITOY	No	Neg	NA	Neg	Neg	NA	Neg	Neg	Pos	Pos	1+	1+	0	0	Neg	Neg	0	0	0	0	NA	0	03/08/2015	8	NA	Yes	39	Not ambiguous	Not ambiguous	2798	Neg	FALSE	M	Fixed	FALSE	1	1	0	0	0	0	0	0	Pos	Pos	Neg	Neg	Neg
J312	HGR/BAGATA	No	Neg	NA	Neg	Neg	NA	Neg	Neg	Neg	Neg	0	0	0	0	Pos	Pos	3+	2+	0	0	NA	0	24/07/2015	NA	NA	Yes	29	Not ambiguous	Not ambiguous	2799	Neg	FALSE	J	Fixed	FALSE	0	0	0	0	1	1	0	0	Neg	Neg	Neg	Neg	Pos
m421	HS DE KITOY	No	Neg	NA	Neg	Neg	NA	Neg	Neg	Neg	Neg	0	0	0	0	Pos	Pos	0	0	2+	2+	NA	0	30/07/2015	NA	NA	Yes	33	Not ambiguous	Not ambiguous	2800	Neg	FALSE	M	Fixed	FALSE	0	0	0	0	0	0	1	1	Neg	Neg	Neg	Neg	Neg
J019	HGR BAGATA	No	Neg	NA	Neg	Neg	NA	Neg	Neg	Neg	Neg	0	0	0	0	Pos	Pos	0	0	2+	2+	NA	0	20/06/2015	NA	NA	Yes	27	Not ambiguous	Not ambiguous	2801	Neg	FALSE	J	Fixed	FALSE	0	0	0	0	0	0	1	1	Neg	Neg	Neg	Neg	Neg
E2629	IDIOFA	No	Pos	Neg	Neg	Neg	NA	Neg	Neg	Pos	Pos	2+	2+	0	0	Neg	Neg	0	0	0	0	NA	0	18/06/2015	NA	4	Yes	5	Not ambiguous	Not ambiguous	2803	Pos	TRUE	E	Mobile	FALSE	1	1	0	0	0	0	0	0	Pos	Pos	Neg	Neg	Neg
J029	HGR BAGATA	No	Neg	NA	Neg	Neg	NA	Neg	Neg	Neg	Neg	0	0	0	0	Pos	Pos	2+	2+	0	0	NA	0	20/06/2015	NA	NA	Yes	55	Not ambiguous	Not ambiguous	2804	Neg	FALSE	J	Fixed	FALSE	0	0	0	0	1	1	0	0	Neg	Neg	Neg	Neg	Pos
J058	HGR BAGATA	No	Neg	NA	Neg	Neg	NA	Neg	Neg	Pos	Pos	2+	2+	0	0	Neg	Neg	0	0	0	0	NA	0	23/06/2015	NA	NA	Yes	9	Not ambiguous	Not ambiguous	2805	Neg	FALSE	J	Fixed	FALSE	1	1	0	0	0	0	0	0	Pos	Pos	Neg	Neg	Neg
J070	HGR BAGATA	No	Neg	NA	Neg	Neg	NA	Neg	Neg	Pos	Pos	0	0	3+	3+	Neg	Neg	0	0	0	0	NA	0	23/06/2015	NA	NA	Yes	10	Not ambiguous	Not ambiguous	2806	Neg	FALSE	J	Fixed	FALSE	0	0	1	1	0	0	0	0	Neg	Neg	Pos	Pos	Neg
J129	HGR BAGATA	No	Neg	NA	Neg	Neg	NA	Neg	Neg	Neg	Neg	0	0	0	0	Pos	Pos	2+	2+	0	0	NA	0	29/06/2015	NA	NA	Yes	45	Not ambiguous	Not ambiguous	2807	Neg	FALSE	J	Fixed	FALSE	0	0	0	0	1	1	0	0	Neg	Neg	Neg	Neg	Pos
M412	HS DE KITOY	No	Neg	NA	Neg	Neg	NA	Neg	Neg	Neg	Neg	0	0	0	0	Pos	Pos	1+	1+	1+	1+	NA	0	30/07/2015	NA	NA	Yes	7	Not ambiguous	Not ambiguous	2808	Neg	FALSE	M	Fixed	FALSE	0	0	0	0	1	1	1	1	Neg	Neg	Neg	Neg	Pos
M398	HS DE KITOY	No	Neg	NA	Neg	Neg	NA	Neg	Neg	Neg	Neg	0	0	0	0	Pos	Pos	2+	2+	2+	2+	NA	0	29/07/2015	NA	NA	Yes	19	Not ambiguous	Not ambiguous	2809	Neg	FALSE	M	Fixed	FALSE	0	0	0	0	1	1	1	1	Neg	Neg	Neg	Neg	Pos
M396	HS DE KITOY	No	Neg	NA	Neg	Neg	NA	Neg	Neg	Pos	Pos	1+	1+	0	0	Pos	Pos	0	0	2+	2+	NA	0	29/07/2015	5	NA	Yes	21	Not ambiguous	Not ambiguous	2810	Neg	FALSE	M	Fixed	FALSE	1	1	0	0	0	0	1	1	Pos	Pos	Neg	Neg	Neg
M376	HS DE KITOY	No	Neg	NA	Neg	Neg	NA	Neg	Neg	Neg	Neg	0	0	0	0	Pos	Pos	2+	2+	0	0	NA	0	28/07/2015	NA	NA	Yes	35	Not ambiguous	Not ambiguous	2811	Neg	FALSE	M	Fixed	FALSE	0	0	0	0	1	1	0	0	Neg	Neg	Neg	Neg	Pos
N363	MASAMUNA	No	Neg	NA	Neg	Neg	NA	Neg	Neg	Pos	Pos	0	0	1+	1+	Neg	Neg	0	0	0	0	NA	0	26/06/2015	NA	NA	Yes	38	Not ambiguous	Not ambiguous	2812	Neg	FALSE	N	Fixed	FALSE	0	0	1	1	0	0	0	0	Neg	Neg	Pos	Pos	Neg
N377	MASAMUNA	No	Neg	NA	Neg	Neg	NA	Pos	Pos	Neg	Neg	0	0	0	0	Pos	Pos	1+	1+	1+	1+	NA	0	29/06/2015	NA	NA	Yes	6	Not ambiguous	Not ambiguous	2813	Neg	FALSE	N	Fixed	FALSE	0	0	0	0	1	1	1	1	Neg	Neg	Neg	Neg	Pos
E3821	IDIOFA	No	Neg	NA	Neg	Neg	NA	Pos	Pos	Neg	Neg	0	0	0	0	Neg	Neg	0	0	0	0	NA	0	25/06/2015	NA	NA	Yes	35	Not ambiguous	Not ambiguous	2814	Neg	FALSE	E	Mobile	FALSE	0	0	0	0	0	0	0	0	Neg	Neg	Neg	Neg	Neg
E3380	IDIOFA	No	Neg	NA	Neg	Neg	NA	Pos	Pos	Neg	Neg	0	0	0	0	Pos	Pos	1+	1+	0	0	NA	0	22/06/2015	NA	NA	Yes	3	Not ambiguous	Not ambiguous	2815	Neg	FALSE	E	Mobile	FALSE	0	0	0	0	1	1	0	0	Neg	Neg	Neg	Neg	Pos
E3863	IDIOFA	No	Neg	NA	Neg	Neg	NA	Pos	Neg	Pos	Pos	1+	1+	0	0	Neg	Neg	0	0	0	0	NA	0	25/06/2015	11	NA	Yes	42	Not ambiguous	Not ambiguous	2816	Neg	FALSE	E	Mobile	FALSE	1	1	0	0	0	0	0	0	Pos	Pos	Neg	Neg	Neg
E3328	IDIOFA	No	Neg	NA	Neg	Neg	NA	Neg	Neg	Neg	Neg	0	0	0	0	Pos	Pos	2+	2+	0	0	NA	0	21/06/2015	NA	NA	Yes	68	Not ambiguous	Not ambiguous	2817	Neg	FALSE	E	Mobile	FALSE	0	0	0	0	1	1	0	0	Neg	Neg	Neg	Neg	Pos
E1825	IDIOFA	No	Neg	NA	Neg	Neg	NA	Pos	Pos	Neg	Neg	0	0	0	0	Neg	Neg	0	0	0	0	NA	0	13/06/2015	NA	NA	Yes	5	Not ambiguous	Not ambiguous	2818	Neg	FALSE	E	Mobile	FALSE	0	0	0	0	0	0	0	0	Neg	Neg	Neg	Neg	Neg
E3534	IDIOFA	No	Neg	NA	Neg	Neg	NA	Neg	Neg	Pos	Pos	1+	1+	0	0	Neg	Neg	0	0	0	0	NA	0	25/06/2015	17	NA	Yes	17	Not ambiguous	Not ambiguous	2819	Neg	FALSE	E	Mobile	FALSE	1	1	0	0	0	0	0	0	Pos	Pos	Neg	Neg	Neg
E2007	IDIOFA	No	Neg	NA	Neg	Neg	NA	Pos	Pos	Neg	Neg	0	0	0	0	Neg	Neg	0	0	0	0	NA	0	15/06/2015	NA	NA	Yes	57	Not ambiguous	Not ambiguous	2820	Neg	FALSE	E	Mobile	FALSE	0	0	0	0	0	0	0	0	Neg	Neg	Neg	Neg	Neg
E3050	IDIOFA	No	Neg	NA	Neg	Neg	NA	Pos	Pos	Neg	Neg	0	0	0	0	Pos	Pos	2+	2+	0	0	NA	0	21/06/2015	NA	NA	Yes	12	Not ambiguous	Not ambiguous	2821	Neg	FALSE	E	Mobile	FALSE	0	0	0	0	1	1	0	0	Neg	Neg	Neg	Neg	Pos
E2376	IDIOFA	No	Neg	NA	Neg	Neg	NA	Pos	Pos	Neg	Neg	0	0	0	0	Neg	Neg	0	0	0	0	NA	0	17/06/2015	NA	NA	Yes	33	Not ambiguous	Not ambiguous	2822	Neg	FALSE	E	Mobile	FALSE	0	0	0	0	0	0	0	0	Neg	Neg	Neg	Neg	Neg
E2909	IDIOFA	No	Neg	NA	Neg	Neg	NA	Pos	Pos	Neg	Neg	0	0	0	0	Pos	Pos	1+	1+	0	0	NA	0	20/06/2015	NA	NA	Yes	20	Not ambiguous	Not ambiguous	2823	Neg	FALSE	E	Mobile	FALSE	0	0	0	0	1	1	0	0	Neg	Neg	Neg	Neg	Pos
E2361	IDIOFA	No	Neg	NA	Neg	Neg	NA	Pos	Pos	Neg	Neg	0	0	0	0	Pos	Pos	1+	1+	0	0	NA	0	17/06/2015	NA	NA	Yes	31	Not ambiguous	Not ambiguous	2824	Neg	FALSE	E	Mobile	FALSE	0	0	0	0	1	1	0	0	Neg	Neg	Neg	Neg	Pos
E2915	IDIOFA	No	Neg	NA	Neg	Neg	NA	Pos	Pos	Pos	Pos	1+	1+	0	0	Neg	Neg	0	0	0	0	NA	0	21/06/2015	20	NA	Yes	35	Not ambiguous	Not ambiguous	2825	Neg	FALSE	E	Mobile	FALSE	1	1	0	0	0	0	0	0	Pos	Pos	Neg	Neg	Neg
E2938	IDIOFA	No	Neg	NA	Neg	Neg	NA	Neg	Neg	Pos	Pos	2+	2+	1+	1+	Neg	Neg	0	0	0	0	NA	0	21/06/2015	NA	NA	Yes	22	Not ambiguous	Not ambiguous	2826	Neg	FALSE	E	Mobile	FALSE	1	1	1	1	0	0	0	0	Pos	Pos	Pos	Pos	Neg
E2980	IDIOFA	No	Neg	NA	Neg	Neg	NA	Pos	Pos	Neg	Neg	0	0	0	0	Pos	Pos	1+	1+	2+	2+	NA	0	21/06/2015	NA	NA	Yes	30	Not ambiguous	Not ambiguous	2827	Neg	FALSE	E	Mobile	FALSE	0	0	0	0	1	1	1	1	Neg	Neg	Neg	Neg	Pos
E4256	IDIOFA	No	Neg	NA	Neg	Neg	NA	Neg	Pos	Neg	Neg	0	0	0	0	Neg	Neg	0	0	0	0	NA	0	25/06/2015	NA	NA	Yes	15	Not ambiguous	Ambiguous	2828	Neg	FALSE	E	Mobile	FALSE	0	0	0	0	0	0	0	0	Neg	Neg	Neg	Neg	Neg
E3755	IDIOFA	No	Neg	NA	Neg	Neg	NA	Pos	Pos	Neg	Neg	0	0	0	0	Neg	Neg	0	0	0	0	NA	0	24/06/2015	NA	NA	Yes	52	Not ambiguous	Not ambiguous	2829	Neg	FALSE	E	Mobile	FALSE	0	0	0	0	0	0	0	0	Neg	Neg	Neg	Neg	Neg
E1868	IDIOFA	No	Neg	NA	Neg	Neg	NA	Pos	Pos	Neg	Neg	0	0	0	0	Pos	Pos	1+	1+	0	0	NA	0	14/06/2015	NA	NA	Yes	27	Not ambiguous	Not ambiguous	2830	Neg	FALSE	E	Mobile	FALSE	0	0	0	0	1	1	0	0	Neg	Neg	Neg	Neg	Pos
E1802	IDIOFA	No	Neg	NA	Neg	Neg	NA	Neg	Neg	Pos	Pos	1+	1+	0	0	Pos	Pos	1+	1+	0	0	NA	0	13/06/2015	8	NA	Yes	73	Not ambiguous	Not ambiguous	2831	Neg	FALSE	E	Mobile	FALSE	1	1	0	0	1	1	0	0	Pos	Pos	Neg	Neg	Pos
E3754	IDIOFA	No	Neg	NA	Neg	Neg	NA	Pos	Pos	Neg	Neg	0	0	0	0	Pos	Pos	2+	2+	3+	3+	NA	0	24/06/2015	NA	NA	Yes	37	Not ambiguous	Not ambiguous	2832	Neg	FALSE	E	Mobile	FALSE	0	0	0	0	1	1	1	1	Neg	Neg	Neg	Neg	Pos
E1791	IDIOFA	No	Neg	NA	Neg	Neg	NA	Pos	Pos	Pos	Pos	1+	1+	0	0	Pos	Pos	2+	2+	0	0	NA	0	13/06/2015	14	NA	Yes	43	Not ambiguous	Not ambiguous	2833	Neg	FALSE	E	Mobile	FALSE	1	1	0	0	1	1	0	0	Pos	Pos	Neg	Neg	Pos
E3710	IDIOFA	No	Neg	NA	Neg	Neg	NA	Pos	Pos	Pos	Pos	1+	1+	2+	2+	Neg	Neg	0	0	0	0	NA	0	25/06/2015	8	NA	Yes	15	Not ambiguous	Not ambiguous	2834	Neg	FALSE	E	Mobile	FALSE	1	1	1	1	0	0	0	0	Pos	Pos	Pos	Pos	Neg
E3792	IDIOFA	No	Neg	NA	Neg	Neg	NA	Pos	Pos	Pos	Pos	1+	1+	2+	2+	Neg	Neg	0	0	0	0	NA	0	24/06/2015	14	NA	Yes	56	Not ambiguous	Not ambiguous	2835	Neg	FALSE	E	Mobile	FALSE	1	1	1	1	0	0	0	0	Pos	Pos	Pos	Pos	Neg
E1788	IDIOFA	No	Neg	NA	Neg	Neg	NA	Pos	Pos	Neg	Neg	0	0	0	0	Neg	Neg	0	0	0	0	NA	0	13/06/2015	NA	NA	Yes	67	Not ambiguous	Not ambiguous	2836	Neg	FALSE	E	Mobile	FALSE	0	0	0	0	0	0	0	0	Neg	Neg	Neg	Neg	Neg
E3769	IDIOFA	No	Neg	NA	Neg	Neg	NA	Pos	Pos	Neg	Neg	0	0	0	0	Neg	Neg	0	0	0	0	NA	0	24/06/2015	NA	NA	Yes	47	Not ambiguous	Not ambiguous	2837	Neg	FALSE	E	Mobile	FALSE	0	0	0	0	0	0	0	0	Neg	Neg	Neg	Neg	Neg
E2547	IDIOFA	No	Neg	NA	Neg	Neg	NA	Pos	Pos	Neg	Neg	0	0	0	0	Neg	Neg	0	0	0	0	NA	0	18/06/2015	NA	NA	Yes	25	Not ambiguous	Not ambiguous	2838	Neg	FALSE	E	Mobile	FALSE	0	0	0	0	0	0	0	0	Neg	Neg	Neg	Neg	Neg
E2491	IDIOFA	No	Neg	NA	Neg	Neg	NA	Pos	Pos	Neg	Neg	0	0	0	0	Pos	Pos	2+	2+	0	0	NA	0	18/06/2015	NA	NA	Yes	35	Not ambiguous	Not ambiguous	2839	Neg	FALSE	E	Mobile	FALSE	0	0	0	0	1	1	0	0	Neg	Neg	Neg	Neg	Pos
E2489	IDIOFA	No	Neg	NA	Neg	Neg	NA	Pos	Pos	Neg	Neg	0	0	0	0	Neg	Neg	0	0	0	0	NA	0	18/06/2015	NA	NA	Yes	15	Not ambiguous	Not ambiguous	2840	Neg	FALSE	E	Mobile	FALSE	0	0	0	0	0	0	0	0	Neg	Neg	Neg	Neg	Neg
E2378	IDIOFA	No	Neg	NA	Neg	Neg	NA	Pos	Pos	Neg	Neg	0	0	0	0	Neg	Neg	0	0	0	0	NA	0	18/06/2015	NA	NA	Yes	22	Not ambiguous	Not ambiguous	2841	Neg	FALSE	E	Mobile	FALSE	0	0	0	0	0	0	0	0	Neg	Neg	Neg	Neg	Neg
E2293	IDIOFA	No	Neg	NA	Neg	Neg	NA	Pos	Pos	Neg	Neg	0	0	0	0	Pos	Pos	1+	1+	0	0	NA	0	18/06/2015	NA	NA	Yes	18	Not ambiguous	Not ambiguous	2842	Neg	FALSE	E	Mobile	FALSE	0	0	0	0	1	1	0	0	Neg	Neg	Neg	Neg	Pos
E2578	IDIOFA	No	Neg	NA	Neg	Neg	NA	Pos	Pos	Neg	Neg	0	0	0	0	Neg	Neg	0	0	0	0	NA	0	18/06/2015	NA	NA	Yes	24	Not ambiguous	Not ambiguous	2843	Neg	FALSE	E	Mobile	FALSE	0	0	0	0	0	0	0	0	Neg	Neg	Neg	Neg	Neg
E1785	IDIOFA	No	Neg	NA	Neg	Neg	NA	Neg	Neg	Neg	Neg	0	0	0	0	Pos	Pos	1+	1+	0	0	NA	0	13/06/2015	NA	NA	Yes	43	Not ambiguous	Not ambiguous	2846	Neg	FALSE	E	Mobile	FALSE	0	0	0	0	1	1	0	0	Neg	Neg	Neg	Neg	Pos
E2487	IDIOFA	No	Neg	NA	Neg	Neg	NA	Pos	Pos	Neg	Neg	0	0	0	0	Pos	Pos	2+	2+	0	0	NA	0	18/06/2015	NA	NA	Yes	37	Not ambiguous	Not ambiguous	2847	Neg	FALSE	E	Mobile	FALSE	0	0	0	0	1	1	0	0	Neg	Neg	Neg	Neg	Pos
E2532	IDIOFA	No	Neg	NA	Neg	Neg	NA	Pos	Pos	Neg	Neg	0	0	0	0	Neg	Neg	0	0	0	0	NA	0	18/06/2015	NA	NA	Yes	20	Not ambiguous	Not ambiguous	2848	Neg	FALSE	E	Mobile	FALSE	0	0	0	0	0	0	0	0	Neg	Neg	Neg	Neg	Neg
E2898	IDIOFA	No	Neg	NA	Neg	Neg	NA	Pos	Pos	Neg	Neg	0	0	0	0	Neg	Neg	0	0	0	0	NA	0	20/06/2015	NA	NA	Yes	57	Not ambiguous	Not ambiguous	2849	Neg	FALSE	E	Mobile	FALSE	0	0	0	0	0	0	0	0	Neg	Neg	Neg	Neg	Neg
E3512	IDIOFA	No	Neg	NA	Neg	Neg	NA	Neg	Neg	Neg	Neg	0	0	0	0	Pos	Pos	1+	1+	0	0	NA	0	24/06/2015	NA	NA	Yes	63	Not ambiguous	Not ambiguous	2850	Neg	FALSE	E	Mobile	FALSE	0	0	0	0	1	1	0	0	Neg	Neg	Neg	Neg	Pos
E3376	IDIOFA	No	Neg	NA	Neg	Neg	NA	Pos	Pos	Neg	Neg	0	0	0	0	Pos	Pos	1+	1+	0	0	NA	0	22/06/2015	NA	NA	Yes	37	Not ambiguous	Not ambiguous	2851	Neg	FALSE	E	Mobile	FALSE	0	0	0	0	1	1	0	0	Neg	Neg	Neg	Neg	Pos
E3553	IDIOFA	No	Neg	NA	Neg	Neg	NA	Pos	Pos	Pos	Pos	1+	1+	1+	1+	Pos	Pos	1+	1+	1+	1+	NA	0	25/06/2015	5	NA	Yes	18	Not ambiguous	Not ambiguous	2852	Neg	FALSE	E	Mobile	FALSE	1	1	1	1	1	1	1	1	Pos	Pos	Pos	Pos	Pos
E3588	IDIOFA	No	Neg	NA	Neg	Neg	NA	Pos	Pos	Neg	Neg	0	0	0	0	Neg	Neg	0	0	0	0	NA	0	25/06/2015	NA	NA	Yes	18	Not ambiguous	Not ambiguous	2853	Neg	FALSE	E	Mobile	FALSE	0	0	0	0	0	0	0	0	Neg	Neg	Neg	Neg	Neg
N039	MASAMUNA	No	Neg	NA	Neg	Neg	NA	Neg	Neg	Neg	Neg	0	0	0	0	Pos	Pos	2+	2+	0	0	NA	0	28/05/2015	NA	NA	Yes	34	Not ambiguous	Not ambiguous	2854	Neg	FALSE	N	Fixed	FALSE	0	0	0	0	1	1	0	0	Neg	Neg	Neg	Neg	Pos
D1993	MOKALA	No	Neg	NA	Neg	Neg	NA	Neg	Neg	Neg	Neg	0	0	0	0	Pos	Pos	0	0	2+	2+	NA	0	26/07/2015	NA	NA	Yes	34	Not ambiguous	Not ambiguous	2855	Neg	FALSE	D	Mobile	FALSE	0	0	0	0	0	0	1	1	Neg	Neg	Neg	Neg	Neg
D1982	MOKALA	No	Neg	NA	Neg	Neg	NA	Neg	Neg	Pos	Pos	2+	1+	1+	1+	Neg	Neg	0	0	0	0	NA	0	26/07/2015	2	NA	Yes	31	Not ambiguous	Not ambiguous	2856	Neg	FALSE	D	Mobile	FALSE	1	1	1	1	0	0	0	0	Pos	Pos	Pos	Pos	Neg
D1976	MOKALA	No	Neg	NA	Neg	Neg	NA	Neg	Neg	Neg	Neg	0	0	0	0	Pos	Pos	2+	1+	0	0	NA	0	26/07/2015	NA	NA	Yes	2	Not ambiguous	Not ambiguous	2857	Neg	FALSE	D	Mobile	FALSE	0	0	0	0	1	1	0	0	Neg	Neg	Neg	Neg	Pos
D1771	MOKALA	No	Neg	NA	Neg	Neg	NA	Neg	Neg	Neg	Neg	0	0	0	0	Pos	Pos	2+	2+	2+	2+	NA	0	25/07/2015	NA	NA	Yes	25	Not ambiguous	Not ambiguous	2858	Neg	FALSE	D	Mobile	FALSE	0	0	0	0	1	1	1	1	Neg	Neg	Neg	Neg	Pos
D1408	MOKALA	No	Neg	NA	Neg	Neg	NA	Pos	Neg	Pos	Pos	1+	1+	2+	2+	Pos	Pos	3+	3+	2+	3+	NA	0	25/07/2015	1	NA	Yes	31	Not ambiguous	Not ambiguous	2860	Neg	FALSE	D	Mobile	FALSE	1	1	1	1	1	1	1	1	Pos	Pos	Pos	Pos	Pos
D1157	MOKALA	No	Neg	NA	Neg	Neg	NA	Pos	Pos	Neg	Neg	0	0	0	0	Neg	Neg	0	0	0	0	NA	0	25/07/2015	NA	NA	Yes	22	Not ambiguous	Ambiguous	2861	Neg	FALSE	D	Mobile	FALSE	0	0	0	0	0	0	0	0	Neg	Neg	Neg	Neg	Neg
D1142	MOKALA	No	Neg	NA	Neg	Neg	NA	Neg	Neg	Pos	Pos	2+	2+	1+	1+	Neg	Neg	0	0	0	0	NA	0	25/07/2015	NA	NA	Yes	10	Not ambiguous	Not ambiguous	2862	Neg	FALSE	D	Mobile	FALSE	1	1	1	1	0	0	0	0	Pos	Pos	Pos	Pos	Neg
D1004	MOKALA	No	Neg	NA	Neg	Neg	NA	Pos	Pos	Neg	Neg	0	0	0	0	Pos	Pos	3+	2+	2+	2+	NA	0	25/07/2015	NA	NA	Yes	19	Not ambiguous	Not ambiguous	2863	Neg	FALSE	D	Mobile	FALSE	0	0	0	0	1	1	1	1	Neg	Neg	Neg	Neg	Pos
D0972	MOKALA	No	Neg	NA	Neg	Neg	NA	Neg	Neg	Neg	Neg	0	0	0	0	Pos	Pos	2+	1+	2+	2+	NA	0	25/07/2015	NA	NA	Yes	8	Not ambiguous	Not ambiguous	2864	Neg	FALSE	D	Mobile	FALSE	0	0	0	0	1	1	1	1	Neg	Neg	Neg	Neg	Pos
D0956	MOKALA	No	Neg	NA	Neg	Neg	NA	Neg	Neg	Neg	Neg	0	0	0	0	Pos	Pos	1+	1+	1+	1+	NA	0	25/07/2015	NA	NA	Yes	12	Not ambiguous	Not ambiguous	2865	Neg	FALSE	D	Mobile	FALSE	0	0	0	0	1	1	1	1	Neg	Neg	Neg	Neg	Pos
D0605	MOKALA	No	Neg	NA	Neg	Neg	Neg	Pos	Pos	Pos	Pos	2+	2+	3+	2+	Neg	Neg	0	0	0	0	NA	0	25/07/2015	NA	NA	Yes	28	Not ambiguous	Not ambiguous	2866	Neg	FALSE	D	Mobile	FALSE	1	1	1	1	0	0	0	0	Pos	Pos	Pos	Pos	Neg
D0613	MOKALA	No	Neg	NA	Neg	Neg	NA	Neg	Neg	Pos	Pos	1+	1+	2+	2+	Neg	Neg	0	0	0	0	NA	0	25/07/2015	25	NA	Yes	17	Not ambiguous	Not ambiguous	2867	Neg	FALSE	D	Mobile	FALSE	1	1	1	1	0	0	0	0	Pos	Pos	Pos	Pos	Neg
D0380	MOKALA	No	Neg	NA	Neg	Neg	NA	Pos	Pos	Pos	Pos	3+	3+	2+	3+	Neg	Neg	0	0	0	0	NA	0	24/07/2015	NA	NA	Yes	17	Not ambiguous	Not ambiguous	2868	Neg	FALSE	D	Mobile	FALSE	1	1	1	1	0	0	0	0	Pos	Pos	Pos	Pos	Neg
J581	HGR/BAGATA	No	Neg	NA	Neg	Neg	NA	Neg	Neg	Neg	Neg	0	0	0	0	Pos	Pos	3+	3+	0	0	NA	0	24/07/2015	NA	NA	Yes	29	Not ambiguous	Not ambiguous	2869	Neg	FALSE	J	Fixed	FALSE	0	0	0	0	1	1	0	0	Neg	Neg	Neg	Neg	Pos
D0410	MOKALA	No	Neg	NA	Neg	Neg	NA	Neg	Neg	Neg	Neg	0	0	0	0	Pos	Pos	0	0	3+	2+	NA	0	24/07/2015	NA	NA	Yes	29	Not ambiguous	Not ambiguous	2870	Neg	FALSE	D	Mobile	FALSE	0	0	0	0	0	0	1	1	Neg	Neg	Neg	Neg	Neg
D0376	MOKALA	No	Neg	NA	Neg	Neg	NA	Neg	Neg	Pos	Pos	2+	1+	2+	2+	Neg	Neg	0	0	0	0	NA	0	24/07/2015	NA	NA	Yes	40	Not ambiguous	Not ambiguous	2871	Neg	FALSE	D	Mobile	FALSE	1	1	1	1	0	0	0	0	Pos	Pos	Pos	Pos	Neg
D0379	MOKALA	No	Neg	NA	Neg	Neg	NA	Pos	Pos	Pos	Pos	3+	2+	2+	2+	Neg	Neg	0	0	0	0	NA	0	24/07/2015	NA	NA	Yes	18	Not ambiguous	Not ambiguous	2872	Neg	FALSE	D	Mobile	FALSE	1	1	1	1	0	0	0	0	Pos	Pos	Pos	Pos	Neg
D0355	MOKALA	No	Neg	NA	Neg	Neg	NA	Neg	Neg	Neg	Neg	0	0	0	0	Pos	Pos	0	0	2+	2+	NA	0	24/07/2015	NA	NA	Yes	52	Not ambiguous	Not ambiguous	2873	Neg	FALSE	D	Mobile	FALSE	0	0	0	0	0	0	1	1	Neg	Neg	Neg	Neg	Neg
D0356	MOKALA	No	Neg	NA	Neg	Neg	NA	Neg	Neg	Pos	Pos	2+	2+	1+	2+	Neg	Neg	0	0	0	0	NA	0	24/07/2015	NA	NA	Yes	3	Not ambiguous	Not ambiguous	2874	Neg	FALSE	D	Mobile	FALSE	1	1	1	1	0	0	0	0	Pos	Pos	Pos	Pos	Neg
D0366	MOKALA	No	Neg	NA	Neg	Neg	Neg	Neg	Neg	Neg	Neg	0	0	0	0	Pos	Pos	0	0	2+	1+	NA	0	24/07/2015	NA	NA	Yes	12	Not ambiguous	Not ambiguous	2875	Neg	FALSE	D	Mobile	FALSE	0	0	0	0	0	0	1	1	Neg	Neg	Neg	Neg	Neg
D0350	MOKALA	No	Neg	NA	Neg	Neg	NA	Pos	Pos	Neg	Neg	0	0	0	0	Neg	Neg	0	0	0	0	NA	0	24/07/2015	NA	NA	Yes	72	Not ambiguous	Not ambiguous	2876	Neg	FALSE	D	Mobile	FALSE	0	0	0	0	0	0	0	0	Neg	Neg	Neg	Neg	Neg
D0341	MOKALA	No	Neg	NA	Neg	Neg	NA	Pos	Pos	Pos	Pos	3+	2+	2+	2+	Neg	Neg	0	0	0	0	NA	0	24/07/2015	NA	NA	Yes	25	Ambiguous	Ambiguous	2877	Neg	FALSE	D	Mobile	FALSE	1	1	1	1	0	0	0	0	Pos	Pos	Pos	Pos	Neg
D0339	MOKALA	No	Neg	NA	Neg	Neg	NA	Pos	Pos	Neg	Neg	0	0	0	0	Neg	Neg	0	0	0	0	NA	0	23/07/2015	NA	NA	Yes	33	Ambiguous	Not ambiguous	2878	Neg	FALSE	D	Mobile	FALSE	0	0	0	0	0	0	0	0	Neg	Neg	Neg	Neg	Neg
D0332	MOKALA	No	Neg	NA	Neg	Neg	NA	Neg	Neg	Neg	Neg	0	0	0	0	Pos	Pos	0	0	1+	1+	NA	0	23/07/2015	NA	NA	Yes	30	Not ambiguous	Not ambiguous	2879	Neg	FALSE	D	Mobile	FALSE	0	0	0	0	0	0	1	1	Neg	Neg	Neg	Neg	Neg
D0290	MOKALA	No	Neg	Neg	Neg	Neg	NA	Neg	Neg	Neg	Neg	0	0	0	0	Neg	Neg	0	0	0	0	NA	0	23/07/2015	NA	1	Yes	17	Not ambiguous	Not ambiguous	2880	Neg	FALSE	D	Mobile	FALSE	0	0	0	0	0	0	0	0	Neg	Neg	Neg	Neg	Neg
D0242	MOKALA	No	Neg	NA	Neg	Neg	NA	Neg	Neg	Neg	Neg	0	0	0	0	Pos	Pos	0	0	2+	1+	NA	0	23/07/2015	NA	NA	Yes	10	Not ambiguous	Not ambiguous	2882	Neg	FALSE	D	Mobile	FALSE	0	0	0	0	0	0	1	1	Neg	Neg	Neg	Neg	Neg
D0223	MOKALA	No	Neg	NA	Neg	Neg	NA	Pos	Pos	Neg	Neg	0	0	0	0	Neg	Neg	0	0	0	0	NA	0	23/07/2015	NA	NA	Yes	1	Not ambiguous	Not ambiguous	2883	Neg	FALSE	D	Mobile	FALSE	0	0	0	0	0	0	0	0	Neg	Neg	Neg	Neg	Neg
N389	MASAMUNA	No	Neg	NA	Neg	Neg	NA	Neg	Neg	Pos	Pos	1+	1+	0	0	Neg	Neg	0	0	0	0	NA	0	01/07/2015	1	NA	Yes	50	Not ambiguous	Not ambiguous	2884	Neg	FALSE	N	Fixed	FALSE	1	1	0	0	0	0	0	0	Pos	Pos	Neg	Neg	Neg
D0211	MOKALA	No	Neg	NA	Neg	Neg	NA	Pos	Pos	Neg	Neg	0	0	0	0	Neg	Neg	0	0	0	0	NA	0	23/07/2015	NA	NA	Yes	37	Not ambiguous	Not ambiguous	2885	Neg	FALSE	D	Mobile	FALSE	0	0	0	0	0	0	0	0	Neg	Neg	Neg	Neg	Neg
N381	MASAMUNA	No	Neg	NA	Neg	Neg	NA	Neg	Neg	Neg	Neg	0	0	0	0	Pos	Pos	0	0	1+	1+	NA	0	29/06/2015	NA	NA	Yes	24	Not ambiguous	Not ambiguous	2886	Neg	FALSE	N	Fixed	FALSE	0	0	0	0	0	0	1	1	Neg	Neg	Neg	Neg	Neg
D0154	MOKALA	No	Neg	NA	Neg	Neg	NA	Neg	Neg	Pos	Pos	3+	2+	0	0	Neg	Neg	0	0	0	0	NA	0	22/07/2015	NA	NA	Yes	5	Not ambiguous	Not ambiguous	2887	Neg	FALSE	D	Mobile	FALSE	1	1	0	0	0	0	0	0	Pos	Pos	Neg	Neg	Neg
D0139	MOKALA	No	Neg	NA	Neg	Neg	NA	Neg	Neg	Pos	Pos	3+	3+	1+	1+	Neg	Neg	0	0	0	0	NA	0	22/07/2015	NA	NA	Yes	18	Not ambiguous	Not ambiguous	2888	Neg	FALSE	D	Mobile	FALSE	1	1	1	1	0	0	0	0	Pos	Pos	Pos	Pos	Neg
D140	MOKALA	No	Neg	NA	Neg	Neg	NA	Neg	Neg	Pos	Pos	2+	2+	1+	1+	Neg	Neg	0	0	0	0	NA	0	22/07/2015	NA	NA	Yes	10	Not ambiguous	Not ambiguous	2889	Neg	FALSE	D	Mobile	FALSE	1	1	1	1	0	0	0	0	Pos	Pos	Pos	Pos	Neg
D0118	MOKALA	No	Neg	NA	Neg	Neg	NA	Neg	Neg	Neg	Neg	0	0	0	0	Pos	Pos	0	0	3+	2+	NA	0	22/07/2015	NA	NA	Yes	33	Not ambiguous	Not ambiguous	2890	Neg	FALSE	D	Mobile	FALSE	0	0	0	0	0	0	1	1	Neg	Neg	Neg	Neg	Neg
D086	MOKALA	No	Neg	NA	Neg	Neg	Neg	Neg	Neg	Neg	Neg	0	0	0	0	Pos	Pos	0	0	1+	1+	NA	0	22/07/2015	NA	NA	Yes	30	Not ambiguous	Not ambiguous	2891	Neg	FALSE	D	Mobile	FALSE	0	0	0	0	0	0	1	1	Neg	Neg	Neg	Neg	Neg
D083	MOKALA	No	Neg	NA	Neg	Neg	NA	Neg	Neg	Neg	Neg	0	0	0	0	Pos	Pos	0	0	2+	1+	NA	0	22/07/2015	NA	NA	Yes	41	Not ambiguous	Not ambiguous	2892	Neg	FALSE	D	Mobile	FALSE	0	0	0	0	0	0	1	1	Neg	Neg	Neg	Neg	Neg
D063	MOKALA	No	Neg	NA	Neg	Neg	NA	Neg	Neg	Neg	Neg	0	0	0	0	Pos	Pos	0	0	1+	1+	NA	0	22/07/2015	NA	NA	Yes	51	Not ambiguous	Not ambiguous	2893	Neg	FALSE	D	Mobile	FALSE	0	0	0	0	0	0	1	1	Neg	Neg	Neg	Neg	Neg
D036	MOKALA	No	Neg	NA	Neg	Neg	NA	Pos	Pos	Pos	Pos	2+	3+	1+	1+	Neg	Neg	0	0	0	0	NA	0	21/07/2015	NA	NA	Yes	9	Not ambiguous	Not ambiguous	2895	Neg	FALSE	D	Mobile	FALSE	1	1	1	1	0	0	0	0	Pos	Pos	Pos	Pos	Neg
D034	MOKALA	No	Neg	NA	Neg	Neg	NA	Neg	Neg	Neg	Neg	0	0	0	0	Pos	Pos	3+	2+	2+	2+	NA	0	21/07/2015	NA	NA	Yes	30	Not ambiguous	Not ambiguous	2896	Neg	FALSE	D	Mobile	FALSE	0	0	0	0	1	1	1	1	Neg	Neg	Neg	Neg	Pos
D030	MOKALA	No	Neg	NA	Neg	Neg	NA	Neg	Neg	Neg	Neg	0	0	0	0	Pos	Pos	0	0	3+	2+	NA	0	21/07/2015	NA	NA	Yes	9	Not ambiguous	Not ambiguous	2897	Neg	FALSE	D	Mobile	FALSE	0	0	0	0	0	0	1	1	Neg	Neg	Neg	Neg	Neg
D033	MOKALA	No	Neg	NA	Neg	Neg	NA	Neg	Neg	Neg	Neg	0	0	0	0	Pos	Pos	1+	1+	0	0	NA	0	21/07/2015	NA	NA	Yes	37	Not ambiguous	Not ambiguous	2898	Neg	FALSE	D	Mobile	FALSE	0	0	0	0	1	1	0	0	Neg	Neg	Neg	Neg	Pos
D029	MOKALA	No	Neg	NA	Neg	Neg	NA	Pos	Pos	Pos	Pos	3+	2+	2+	3+	Pos	Pos	2+	2+	0	0	NA	0	21/07/2015	NA	NA	Yes	31	Not ambiguous	Not ambiguous	2899	Neg	FALSE	D	Mobile	FALSE	1	1	1	1	1	1	0	0	Pos	Pos	Pos	Pos	Pos
D024	MOKALA	No	Neg	NA	Neg	Neg	NA	Pos	Pos	Pos	Pos	3+	3+	1+	1+	Neg	Neg	0	0	0	0	NA	0	21/07/2015	NA	NA	Yes	16	Not ambiguous	Not ambiguous	2900	Neg	FALSE	D	Mobile	FALSE	1	1	1	1	0	0	0	0	Pos	Pos	Pos	Pos	Neg
D009	MOKALA	No	Neg	NA	Neg	Neg	NA	Pos	Pos	Pos	Pos	2+	2+	2+	2+	Neg	Neg	0	0	0	0	NA	0	21/07/2015	NA	NA	Yes	5	Not ambiguous	Not ambiguous	2901	Neg	FALSE	D	Mobile	FALSE	1	1	1	1	0	0	0	0	Pos	Pos	Pos	Pos	Neg
D008	MOKALA	No	Neg	NA	Neg	Neg	NA	Neg	Neg	Neg	Neg	0	0	0	0	Pos	Pos	0	0	2+	2+	NA	0	21/07/2015	NA	NA	Yes	32	Not ambiguous	Not ambiguous	2902	Neg	FALSE	D	Mobile	FALSE	0	0	0	0	0	0	1	1	Neg	Neg	Neg	Neg	Neg
D003	MOKALA	No	Neg	NA	Neg	Neg	NA	Pos	Neg	Neg	Neg	0	0	0	0	Neg	Neg	0	0	0	0	NA	0	21/07/2015	NA	NA	Yes	12	Ambiguous	Not ambiguous	2903	Neg	FALSE	D	Mobile	FALSE	0	0	0	0	0	0	0	0	Neg	Neg	Neg	Neg	Neg
Q247	HGR/YASA-BONGA	No	Neg	NA	Neg	Neg	NA	Neg	Neg	Neg	Neg	0	0	0	0	Neg	Pos	0	1+	0	0	NA	0	18/06/2015	NA	NA	Yes	20	Not ambiguous	Not ambiguous	2904	Neg	FALSE	Q	Fixed	FALSE	0	0	0	0	0	1	0	0	Neg	Neg	Neg	Neg	Neg
Q464	HGR/YASA-BONGA	No	Neg	NA	Neg	Neg	NA	Neg	Neg	Neg	Neg	0	0	0	0	Pos	Pos	2+	2+	0	0	NA	0	08/07/2015	NA	NA	Yes	13	Not ambiguous	Not ambiguous	2905	Neg	FALSE	Q	Fixed	FALSE	0	0	0	0	1	1	0	0	Neg	Neg	Neg	Neg	Pos
E1782	IDIOFA	No	Neg	NA	Neg	Neg	NA	Pos	Pos	Neg	Neg	0	0	0	0	Neg	Neg	0	0	0	0	NA	0	13/06/2015	NA	NA	Yes	69	Not ambiguous	Not ambiguous	2906	Neg	FALSE	E	Mobile	FALSE	0	0	0	0	0	0	0	0	Neg	Neg	Neg	Neg	Neg
D0208	MOKALA	No	Neg	NA	Neg	Neg	NA	Neg	Neg	Pos	Pos	1+	1+	0	0	Neg	Neg	0	0	0	0	NA	0	23/07/2015	5	NA	Yes	32	Not ambiguous	Not ambiguous	2907	Neg	FALSE	D	Mobile	FALSE	1	1	0	0	0	0	0	0	Pos	Pos	Neg	Neg	Neg
D0204	MOKALA	No	Neg	NA	Neg	Neg	NA	Neg	Neg	Neg	Neg	0	0	0	0	Pos	Pos	2+	1+	0	0	NA	0	23/07/2015	NA	NA	Yes	47	Not ambiguous	Not ambiguous	2908	Neg	FALSE	D	Mobile	FALSE	0	0	0	0	1	1	0	0	Neg	Neg	Neg	Neg	Pos
D0201	MOKALA	No	Neg	NA	Neg	Neg	NA	Pos	Pos	Neg	Neg	0	0	0	0	Neg	Neg	0	0	0	0	NA	0	23/07/2015	NA	NA	Yes	4	Not ambiguous	Not ambiguous	2909	Neg	FALSE	D	Mobile	FALSE	0	0	0	0	0	0	0	0	Neg	Neg	Neg	Neg	Neg
D0186	MOKALA	No	Neg	NA	Neg	Neg	NA	Neg	Neg	Pos	Pos	1+	1+	0	0	Pos	Pos	0	0	2+	3+	NA	0	23/07/2015	1	NA	Yes	12	Not ambiguous	Not ambiguous	2910	Neg	FALSE	D	Mobile	FALSE	1	1	0	0	0	0	1	1	Pos	Pos	Neg	Neg	Neg
P103	HGR/MASIMANIMBA	No	Neg	NA	Neg	Neg	NA	Neg	Neg	Neg	Neg	0	0	0	0	Pos	Pos	0	0	1+	1+	NA	0	03/06/2015	NA	NA	Yes	15	Not ambiguous	Not ambiguous	2911	Neg	FALSE	P	Fixed	FALSE	0	0	0	0	0	0	1	1	Neg	Neg	Neg	Neg	Neg
P054	HGR/MASIMANIMBA	No	Neg	NA	Neg	Neg	NA	Pos	Pos	Neg	Neg	0	0	0	0	Pos	Pos	1+	1+	2+	2+	NA	0	29/05/2015	NA	NA	Yes	25	Ambiguous	Ambiguous	2912	Neg	FALSE	P	Fixed	FALSE	0	0	0	0	1	1	1	1	Neg	Neg	Neg	Neg	Pos
P046	HGR/MASIMANIMBA	No	Neg	NA	Neg	Neg	NA	Pos	Pos	Neg	Neg	0	0	0	0	Neg	Neg	0	0	0	0	NA	0	28/05/2015	NA	NA	Yes	15	Ambiguous	Not ambiguous	2913	Neg	FALSE	P	Fixed	FALSE	0	0	0	0	0	0	0	0	Neg	Neg	Neg	Neg	Neg
P044	HGR/MASIMANIMBA	No	Neg	NA	Neg	Neg	NA	Neg	Neg	Neg	Neg	0	0	0	0	Pos	Pos	1+	1+	0	0	NA	0	28/05/2015	NA	NA	Yes	40	Ambiguous	Not ambiguous	2914	Neg	FALSE	P	Fixed	FALSE	0	0	0	0	1	1	0	0	Neg	Neg	Neg	Neg	Pos
P034	HGR/MASIMANIMBA	No	Neg	NA	Neg	Neg	Neg	Pos	Pos	Neg	Neg	0	0	0	0	Pos	Pos	1+	1+	1+	1+	NA	0	28/05/2015	NA	NA	Yes	4	Ambiguous	Ambiguous	2915	Neg	FALSE	P	Fixed	FALSE	0	0	0	0	1	1	1	1	Neg	Neg	Neg	Neg	Pos
P032	HGR/MASIMANIMBA	No	Neg	NA	Neg	Neg	NA	Neg	Neg	Neg	Neg	0	0	0	0	Pos	Pos	1+	2+	1+	1+	NA	0	28/05/2015	NA	NA	Yes	10	Not ambiguous	Not ambiguous	2916	Neg	FALSE	P	Fixed	FALSE	0	0	0	0	1	1	1	1	Neg	Neg	Neg	Neg	Pos
P023	HGR/MASIMANIMBA	No	Neg	NA	Neg	Neg	NA	Pos	Pos	Pos	Pos	1+	1+	0	0	Neg	Neg	0	0	0	0	NA	0	27/05/2015	5	NA	Yes	6	Ambiguous	Ambiguous	2917	Neg	FALSE	P	Fixed	FALSE	1	1	0	0	0	0	0	0	Pos	Pos	Neg	Neg	Neg
P007	HGR/MASIMANIMBA	No	Neg	NA	Neg	Neg	NA	Pos	Pos	Neg	Pos	0	1+	0	1+	Pos	Pos	2+	2+	2+	2+	NA	0	26/05/2015	NA	NA	Yes	17	Not ambiguous	Not ambiguous	2918	Neg	FALSE	P	Fixed	FALSE	0	1	0	1	1	1	1	1	Neg	Pos	Neg	Pos	Pos
P001	HGR/MASIMANIMBA	No	Neg	NA	Neg	Neg	Neg	Neg	Neg	Neg	Neg	0	0	0	0	Pos	Pos	1+	1+	0	0	NA	0	26/05/2015	NA	NA	Yes	21	Not ambiguous	Not ambiguous	2919	Neg	FALSE	P	Fixed	FALSE	0	0	0	0	1	1	0	0	Neg	Neg	Neg	Neg	Pos
P528	HGR/MASIMANIMBA	No	Neg	NA	Neg	Neg	NA	Pos	Pos	Neg	Neg	0	0	0	0	Pos	Pos	0	0	1+	1+	NA	0	03/08/2015	NA	NA	Yes	16	Ambiguous	Ambiguous	2920	Neg	FALSE	P	Fixed	FALSE	0	0	0	0	0	0	1	1	Neg	Neg	Neg	Neg	Neg
P525	HGR/MASIMANIMBA	No	Neg	NA	Neg	Neg	NA	Neg	Neg	Neg	Neg	0	0	0	0	Pos	Pos	0	0	1+	1+	NA	0	03/08/2015	NA	NA	Yes	19	Not ambiguous	Not ambiguous	2921	Neg	FALSE	P	Fixed	FALSE	0	0	0	0	0	0	1	1	Neg	Neg	Neg	Neg	Neg
P523	HGR/MASIMANIMBA	No	Neg	NA	Neg	Neg	NA	Neg	Neg	Pos	Pos	1+	1+	0	0	Pos	Pos	0	0	2+	2+	NA	0	03/08/2015	10	NA	Yes	13	Not ambiguous	Not ambiguous	2922	Neg	FALSE	P	Fixed	FALSE	1	1	0	0	0	0	1	1	Pos	Pos	Neg	Neg	Neg
P515	HGR/MASIMANIMBA	No	Neg	NA	Neg	Neg	NA	Pos	Pos	Neg	Neg	0	0	0	0	Neg	Neg	0	0	0	0	NA	0	30/07/2015	NA	NA	Yes	58	Ambiguous	Ambiguous	2923	Neg	FALSE	P	Fixed	FALSE	0	0	0	0	0	0	0	0	Neg	Neg	Neg	Neg	Neg
P507	HGR/MASIMANIMBA	No	Neg	NA	Neg	Neg	NA	Pos	Pos	Pos	Pos	1+	1+	0	0	Neg	Neg	0	0	0	0	NA	0	29/07/2015	1	NA	Yes	16	Not ambiguous	Not ambiguous	2924	Neg	FALSE	P	Fixed	FALSE	1	1	0	0	0	0	0	0	Pos	Pos	Neg	Neg	Neg
P488	HGR/MASIMANIMBA	No	Neg	NA	Neg	Neg	NA	Pos	Neg	Pos	Pos	0	0	1+	3+	Pos	Pos	0	0	1+	1+	NA	0	28/07/2015	NA	NA	Yes	43	Not ambiguous	Not ambiguous	2925	Neg	FALSE	P	Fixed	FALSE	0	0	1	1	0	0	1	1	Neg	Neg	Pos	Pos	Neg
P486	HGR/MASIMANIMBA	No	Neg	NA	Neg	Neg	NA	Neg	Neg	Neg	Neg	0	0	0	0	Pos	Pos	0	0	2+	1+	NA	0	28/07/2015	NA	NA	Yes	58	Not ambiguous	Not ambiguous	2927	Neg	FALSE	P	Fixed	FALSE	0	0	0	0	0	0	1	1	Neg	Neg	Neg	Neg	Neg
P146	HGR/MASIMANIMBA	No	Neg	NA	Neg	Neg	NA	Pos	Neg	Neg	Neg	0	0	0	0	Pos	Pos	1+	1+	0	0	NA	0	08/06/2015	NA	NA	Yes	6	Not ambiguous	Not ambiguous	2928	Neg	FALSE	P	Fixed	FALSE	0	0	0	0	1	1	0	0	Neg	Neg	Neg	Neg	Pos
P106	HGR/MASIMANIMBA	No	Neg	NA	Neg	Neg	NA	Pos	Pos	Neg	Neg	0	0	0	0	Pos	Pos	1+	1+	1+	0	NA	0	03/06/2015	NA	NA	Yes	49	Not ambiguous	Not ambiguous	2929	Neg	FALSE	P	Fixed	FALSE	0	0	0	0	1	1	1	0	Neg	Neg	Neg	Neg	Pos
P150	HGR/MASIMANIMBA	No	Neg	NA	Neg	Neg	NA	Neg	Neg	Neg	Neg	0	0	0	0	Neg	Neg	0	0	0	0	NA	0	02/06/2015	NA	NA	Yes	50	Not ambiguous	Not ambiguous	2930	Neg	FALSE	P	Fixed	FALSE	0	0	0	0	0	0	0	0	Neg	Neg	Neg	Neg	Neg
P091	HGR/MASIMANIMBA	No	Neg	Neg	Pos	Pos	NA	Pos	Pos	Pos	Pos	2+	2+	1+	1+	Pos	Pos	2+	2+	2+	2+	NA	0	02/06/2015	NA	4	Yes	11	Not ambiguous	Not ambiguous	2931	Pos	TRUE	P	Fixed	FALSE	1	1	1	1	1	1	1	1	Pos	Pos	Pos	Pos	Pos
P090	HGR/MASIMANIMBA	No	Neg	Neg	Pos	Pos	NA	Pos	Pos	Neg	Neg	0	0	0	0	Pos	Pos	1+	1+	2+	1+	NA	0	02/06/2015	NA	6	Yes	53	Not ambiguous	Not ambiguous	2932	Pos	TRUE	P	Fixed	FALSE	0	0	0	0	1	1	1	1	Neg	Neg	Neg	Neg	Pos
P087	HGR/MASIMANIMBA	No	Neg	NA	Neg	Neg	NA	Neg	Neg	Neg	Neg	0	0	0	0	Pos	Pos	1+	1+	1+	2+	NA	0	02/06/2015	NA	NA	Yes	12	Not ambiguous	Not ambiguous	2933	Neg	FALSE	P	Fixed	FALSE	0	0	0	0	1	1	1	1	Neg	Neg	Neg	Neg	Pos
P047	HGR/MASIMANIMBA	No	Neg	NA	Neg	Neg	NA	Neg	Neg	Neg	Neg	0	0	0	0	Pos	Pos	0	0	1+	1+	NA	0	28/05/2015	NA	NA	Yes	7	Not ambiguous	Not ambiguous	2935	Neg	FALSE	P	Fixed	FALSE	0	0	0	0	0	0	1	1	Neg	Neg	Neg	Neg	Neg
D2022	UM/MOKALA	No	Neg	Neg	Neg	Neg	NA	Neg	Neg	Neg	Neg	0	0	0	0	Pos	Pos	0	0	3+	2+	NA	0	26/07/2015	NA	1	Yes	46	Not ambiguous	Not ambiguous	2936	Neg	FALSE	D	Mobile	FALSE	0	0	0	0	0	0	1	1	Neg	Neg	Neg	Neg	Neg
D0431	UM/MOKALA	No	Neg	NA	Neg	Neg	NA	Neg	Neg	Neg	Neg	0	0	0	0	Pos	Pos	0	0	1+	1+	NA	0	24/07/2015	NA	NA	Yes	8	Not ambiguous	Not ambiguous	2938	Neg	FALSE	D	Mobile	FALSE	0	0	0	0	0	0	1	1	Neg	Neg	Neg	Neg	Neg
P239	HGR/MASIMANIMBA	Yes	Neg	Pos	Neg	Neg	NA	Pos	Pos	Neg	Neg	0	0	0	0	Pos	Pos	1+	1+	2+	2+	NA	0	18/06/2015	NA	118	Yes	16	Not ambiguous	Not ambiguous	2939	Pos	TRUE	P	Fixed	FALSE	0	0	0	0	1	1	1	1	Neg	Neg	Neg	Neg	Pos
D2057	UM/MOKALA	No	Neg	NA	Neg	Neg	NA	Neg	Neg	Neg	Neg	0	0	0	0	Pos	Pos	0	0	2+	1+	NA	0	26/07/2015	NA	NA	Yes	12	Not ambiguous	Not ambiguous	2940	Neg	FALSE	D	Mobile	FALSE	0	0	0	0	0	0	1	1	Neg	Neg	Neg	Neg	Neg
D2048	UM/MOKALA	No	Neg	NA	Neg	Neg	NA	Pos	Pos	Pos	Pos	0	0	1+	1+	Neg	Neg	0	0	0	0	NA	0	26/07/2015	NA	NA	Yes	17	Not ambiguous	Not ambiguous	2941	Neg	FALSE	D	Mobile	FALSE	0	0	1	1	0	0	0	0	Neg	Neg	Pos	Pos	Neg
D2044	UM/MOKALA	No	Neg	NA	Neg	Neg	NA	Pos	Pos	Neg	Neg	0	0	0	0	Neg	Neg	0	0	0	0	NA	0	26/07/2015	NA	NA	Yes	32	Not ambiguous	Not ambiguous	2942	Neg	FALSE	D	Mobile	FALSE	0	0	0	0	0	0	0	0	Neg	Neg	Neg	Neg	Neg
D002	UM/MOKALA	No	Neg	NA	Neg	Neg	NA	Pos	Pos	Pos	Pos	3+	3+	1+	1+	Neg	Neg	0	0	0	0	NA	0	21/07/2015	NA	NA	Yes	16	Not ambiguous	Not ambiguous	2943	Neg	FALSE	D	Mobile	FALSE	1	1	1	1	0	0	0	0	Pos	Pos	Pos	Pos	Neg
D0175	UM/MOKALA	No	Neg	NA	Neg	Neg	NA	Neg	Neg	Pos	Pos	2+	1+	0	0	Pos	Pos	2+	3+	0	0	NA	0	22/07/2015	NA	NA	Yes	32	Not ambiguous	Not ambiguous	2944	Neg	FALSE	D	Mobile	FALSE	1	1	0	0	1	1	0	0	Pos	Pos	Neg	Neg	Pos
D0176	UM/MOKALA	No	Neg	NA	Neg	Neg	NA	Neg	Neg	Neg	Neg	0	0	0	0	Pos	Pos	1+	1+	0	0	NA	0	22/07/2015	NA	NA	Yes	10	Not ambiguous	Not ambiguous	2945	Neg	FALSE	D	Mobile	FALSE	0	0	0	0	1	1	0	0	Neg	Neg	Neg	Neg	Pos
D2038	UM/MOKALA	No	Neg	NA	Neg	Neg	NA	Neg	Neg	Neg	Neg	0	0	0	0	Pos	Pos	0	0	1+	1+	NA	0	26/07/2015	NA	NA	Yes	24	Not ambiguous	Not ambiguous	2946	Neg	FALSE	D	Mobile	FALSE	0	0	0	0	0	0	1	1	Neg	Neg	Neg	Neg	Neg
D2037	UM/MOKALA	No	Neg	NA	Neg	Neg	NA	Neg	Neg	Neg	Neg	0	0	0	0	Pos	Pos	0	0	2+	2+	NA	0	26/07/2015	NA	NA	Yes	58	Not ambiguous	Not ambiguous	2947	Neg	FALSE	D	Mobile	FALSE	0	0	0	0	0	0	1	1	Neg	Neg	Neg	Neg	Neg
D2026	UM/MOKALA	No	Neg	NA	Neg	Neg	NA	Pos	Pos	Neg	Neg	0	0	0	0	Neg	Neg	0	0	0	0	NA	0	26/07/2015	NA	NA	Yes	17	Not ambiguous	Not ambiguous	2948	Neg	FALSE	D	Mobile	FALSE	0	0	0	0	0	0	0	0	Neg	Neg	Neg	Neg	Neg
D2023	UM/MOKALA	No	Neg	NA	Neg	Neg	NA	Pos	Pos	Pos	Pos	2+	2+	1+	1+	Neg	Neg	0	0	0	0	NA	0	26/07/2015	NA	NA	Yes	18	Not ambiguous	Not ambiguous	2949	Neg	FALSE	D	Mobile	FALSE	1	1	1	1	0	0	0	0	Pos	Pos	Pos	Pos	Neg
D2018	UM/MOKALA	No	Neg	NA	Neg	Neg	NA	Pos	Pos	Neg	Neg	0	0	0	0	Neg	Neg	0	0	0	0	NA	0	26/07/2015	NA	NA	Yes	69	Not ambiguous	Not ambiguous	2950	Neg	FALSE	D	Mobile	FALSE	0	0	0	0	0	0	0	0	Neg	Neg	Neg	Neg	Neg
D2015	UM/MOKALA	No	Neg	NA	Neg	Neg	NA	Neg	Neg	Neg	Neg	0	0	0	0	Pos	Pos	3+	2+	3+	3+	NA	0	26/07/2015	NA	NA	Yes	17	Not ambiguous	Not ambiguous	2951	Neg	FALSE	D	Mobile	FALSE	0	0	0	0	1	1	1	1	Neg	Neg	Neg	Neg	Pos
D2011	UM/MOKALA	No	Neg	NA	Neg	Neg	NA	Neg	Neg	Neg	Neg	0	0	0	0	Pos	Pos	0	0	2+	2+	NA	0	26/07/2015	NA	NA	Yes	12	Not ambiguous	Not ambiguous	2952	Neg	FALSE	D	Mobile	FALSE	0	0	0	0	0	0	1	1	Neg	Neg	Neg	Neg	Neg
D1998	UM/MOKALA	No	Neg	NA	Neg	Neg	Neg	Pos	Pos	Pos	Pos	2+	2+	2+	3+	Neg	Neg	0	0	0	0	NA	0	26/07/2015	NA	NA	Yes	35	Not ambiguous	Not ambiguous	2954	Neg	FALSE	D	Mobile	FALSE	1	1	1	1	0	0	0	0	Pos	Pos	Pos	Pos	Neg
D1997	UM/MOKALA	No	Neg	NA	Neg	Neg	NA	Pos	Pos	Pos	Pos	3+	2+	1+	1+	Neg	Neg	0	0	0	0	NA	0	26/07/2015	NA	NA	Yes	4	Not ambiguous	Not ambiguous	2955	Neg	FALSE	D	Mobile	FALSE	1	1	1	1	0	0	0	0	Pos	Pos	Pos	Pos	Neg
D0167	MOKALA	No	Neg	NA	Neg	Neg	NA	Neg	Neg	Neg	Neg	0	0	0	0	Pos	Pos	2+	2+	0	0	NA	0	22/07/2015	NA	NA	Yes	38	Not ambiguous	Not ambiguous	2956	Neg	FALSE	D	Mobile	FALSE	0	0	0	0	1	1	0	0	Neg	Neg	Neg	Neg	Pos
D0171	MOKALA	No	Neg	NA	Neg	Neg	NA	Neg	Neg	Neg	Neg	0	0	0	0	Pos	Pos	0	0	1+	1+	NA	0	22/07/2015	NA	NA	Yes	10	Not ambiguous	Not ambiguous	2957	Neg	FALSE	D	Mobile	FALSE	0	0	0	0	0	0	1	1	Neg	Neg	Neg	Neg	Neg
D0172	MOKALA	No	Neg	NA	Neg	Neg	NA	Neg	Neg	Neg	Neg	0	0	0	0	Pos	Pos	1+	1+	0	0	NA	0	22/07/2015	NA	NA	Yes	16	Not ambiguous	Not ambiguous	2958	Neg	FALSE	D	Mobile	FALSE	0	0	0	0	1	1	0	0	Neg	Neg	Neg	Neg	Pos
M364	HS DE KITOY	No	Neg	NA	Neg	Neg	NA	Neg	Neg	Pos	Pos	1+	1+	0	0	Pos	Pos	2+	2+	0	0	NA	0	27/07/2015	5	NA	Yes	40	Ambiguous	Ambiguous	2961	Neg	FALSE	M	Fixed	FALSE	1	1	0	0	1	1	0	0	Pos	Pos	Neg	Neg	Pos
M368	HS DE KITOY	No	Neg	NA	Neg	Neg	NA	Neg	Neg	Pos	Pos	1+	1+	1+	1+	Pos	Pos	1+	1+	0	0	NA	0	28/07/2015	8	NA	Yes	65	Not ambiguous	Not ambiguous	2962	Neg	FALSE	M	Fixed	FALSE	1	1	1	1	1	1	0	0	Pos	Pos	Pos	Pos	Pos
P565	HGR/MASIMANIMBA	No	Neg	NA	Neg	Neg	NA	Pos	Pos	Neg	Neg	0	0	0	0	Neg	Neg	0	0	0	0	NA	0	15/08/2015	NA	NA	Yes	19	Not ambiguous	Not ambiguous	2963	Neg	FALSE	P	Fixed	FALSE	0	0	0	0	0	0	0	0	Neg	Neg	Neg	Neg	Neg
P560	HGR/MASIMANIMBA	No	Neg	NA	Neg	Neg	NA	Neg	Neg	Neg	Neg	0	0	0	0	Pos	Pos	2+	2+	0	0	NA	0	14/08/2015	NA	NA	Yes	50	Not ambiguous	Not ambiguous	2964	Neg	FALSE	P	Fixed	FALSE	0	0	0	0	1	1	0	0	Neg	Neg	Neg	Neg	Pos
P548	HGR/MASIMANIMBA	No	Neg	NA	Neg	Neg	NA	Pos	Pos	Neg	Neg	0	0	0	0	Pos	Pos	0	0	2+	2+	NA	0	13/08/2015	NA	NA	Yes	14	Ambiguous	Ambiguous	2965	Neg	FALSE	P	Fixed	FALSE	0	0	0	0	0	0	1	1	Neg	Neg	Neg	Neg	Neg
D2265	UM/MOKALA	No	Neg	NA	Neg	Neg	NA	Neg	Neg	Neg	Neg	0	0	0	0	Pos	Pos	2+	2+	0	0	NA	0	28/07/2015	NA	NA	Yes	49	Not ambiguous	Not ambiguous	2973	Neg	FALSE	D	Mobile	FALSE	0	0	0	0	1	1	0	0	Neg	Neg	Neg	Neg	Pos
D2266	UM/MOKALA	No	Neg	NA	Neg	Neg	NA	Neg	Neg	Pos	Pos	3+	2+	3+	3+	Neg	Neg	0	0	0	0	NA	0	28/07/2015	NA	NA	Yes	25	Not ambiguous	Not ambiguous	2977	Neg	FALSE	D	Mobile	FALSE	1	1	1	1	0	0	0	0	Pos	Pos	Pos	Pos	Neg
D2249	UM/MOKALA	No	Neg	NA	Neg	Neg	NA	Neg	Neg	Neg	Neg	0	0	0	0	Pos	Pos	0	0	3+	2+	NA	0	28/07/2015	NA	NA	Yes	46	Not ambiguous	Not ambiguous	2983	Neg	FALSE	D	Mobile	FALSE	0	0	0	0	0	0	1	1	Neg	Neg	Neg	Neg	Neg
D2227	UM/MOKALA	No	Neg	NA	Neg	Neg	NA	Neg	Neg	Pos	Pos	3+	2+	1+	1+	Neg	Neg	0	0	0	0	NA	0	28/07/2015	NA	NA	Yes	4	Not ambiguous	Not ambiguous	2988	Neg	FALSE	D	Mobile	FALSE	1	1	1	1	0	0	0	0	Pos	Pos	Pos	Pos	Neg
D2225	UM/MOKALA	No	Neg	NA	Neg	Neg	NA	Neg	Neg	Neg	Neg	0	0	0	0	Pos	Pos	1+	1+	2+	2+	NA	0	28/07/2015	NA	NA	Yes	16	Not ambiguous	Not ambiguous	2993	Neg	FALSE	D	Mobile	FALSE	0	0	0	0	1	1	1	1	Neg	Neg	Neg	Neg	Pos
D2222	UM/MOKALA	No	Neg	NA	Neg	Neg	NA	Pos	Pos	Neg	Neg	0	0	0	0	Neg	Neg	0	0	0	0	NA	0	28/07/2015	NA	NA	Yes	25	Not ambiguous	Not ambiguous	2998	Neg	FALSE	D	Mobile	FALSE	0	0	0	0	0	0	0	0	Neg	Neg	Neg	Neg	Neg
D2213	UM/MOKALA	No	Neg	NA	Neg	Neg	NA	Neg	Neg	Neg	Neg	0	0	0	0	Pos	Pos	0	0	2+	2+	NA	0	28/07/2015	NA	NA	Yes	53	Not ambiguous	Not ambiguous	3001	Neg	FALSE	D	Mobile	FALSE	0	0	0	0	0	0	1	1	Neg	Neg	Neg	Neg	Neg
Q178	HGR/ YASA-BONGA	No	Neg	NA	Neg	Neg	NA	Neg	Neg	Neg	Neg	0	0	0	0	Pos	Pos	0	0	1+	1+	NA	0	15/06/2015	NA	NA	Yes	43	Not ambiguous	Not ambiguous	3012	Neg	FALSE	Q	Fixed	FALSE	0	0	0	0	0	0	1	1	Neg	Neg	Neg	Neg	Neg
Q224	HGR YASA BONGA	No	Neg	NA	Neg	Neg	NA	Pos	Pos	Pos	Pos	1+	1+	0	0	Pos	Pos	1+	1+	1+	1+	NA	0	18/06/2015	0.25	NA	Yes	4	Not ambiguous	Not ambiguous	3014	Neg	FALSE	Q	Fixed	FALSE	1	1	0	0	1	1	1	1	Pos	Pos	Neg	Neg	Pos
Q209	HGR YASA BONGA	No	Neg	NA	Neg	Neg	NA	Neg	Neg	Neg	Neg	0	0	0	0	Pos	Pos	1+	1+	0	0	NA	0	17/06/2015	NA	NA	Yes	32	Not ambiguous	Not ambiguous	3018	Neg	FALSE	Q	Fixed	FALSE	0	0	0	0	1	1	0	0	Neg	Neg	Neg	Neg	Pos
J347	HGR BAGATA	No	Neg	NA	Neg	Neg	NA	Neg	Neg	Neg	Neg	0	0	0	0	Pos	Pos	1+	1+	0	0	NA	0	28/07/2015	NA	NA	Yes	38	Not ambiguous	Not ambiguous	3021	Neg	FALSE	J	Fixed	FALSE	0	0	0	0	1	1	0	0	Neg	Neg	Neg	Neg	Pos
J324	HGR BAGATA	No	Neg	NA	Neg	Neg	NA	Neg	Neg	Neg	Neg	0	0	0	0	Pos	Pos	0	0	3+	2+	NA	0	24/07/2015	NA	NA	Yes	12	Not ambiguous	Not ambiguous	3024	Neg	FALSE	J	Fixed	FALSE	0	0	0	0	0	0	1	1	Neg	Neg	Neg	Neg	Neg
J314	HGR BAGATA	No	Neg	NA	Neg	Neg	NA	Neg	Neg	Neg	Neg	0	0	0	0	Pos	Pos	3+	2+	0	0	NA	0	24/07/2015	NA	NA	Yes	25	Not ambiguous	Not ambiguous	3028	Neg	FALSE	J	Fixed	FALSE	0	0	0	0	1	1	0	0	Neg	Neg	Neg	Neg	Pos
J175	HGR BAGATA	No	Neg	NA	Neg	Neg	NA	Neg	Neg	Neg	Neg	0	0	0	0	Pos	Pos	0	0	2+	2+	NA	0	06/07/2015	NA	NA	Yes	16	Not ambiguous	Not ambiguous	3030	Neg	FALSE	J	Fixed	FALSE	0	0	0	0	0	0	1	1	Neg	Neg	Neg	Neg	Neg
J128	HGR BAGATA	No	Neg	NA	Neg	Neg	NA	Neg	Neg	Neg	Neg	0	0	0	0	Pos	Pos	2+	2+	0	0	NA	0	29/06/2015	NA	NA	Yes	29	Not ambiguous	Not ambiguous	3032	Neg	FALSE	J	Fixed	FALSE	0	0	0	0	1	1	0	0	Neg	Neg	Neg	Neg	Pos
J068	HGR BAGATA	No	Neg	NA	Neg	Neg	NA	Neg	Neg	Neg	Neg	0	0	0	0	Pos	Pos	1+	1+	1+	1+	NA	0	23/06/2015	NA	NA	Yes	41	Not ambiguous	Not ambiguous	3034	Neg	FALSE	J	Fixed	FALSE	0	0	0	0	1	1	1	1	Neg	Neg	Neg	Neg	Pos
J039	HGR BAGATA	No	Neg	NA	Neg	Neg	NA	Pos	Neg	Pos	Pos	2+	2+	0	0	Neg	Neg	0	0	0	0	NA	0	22/06/2015	NA	NA	Yes	11	Not ambiguous	Not ambiguous	3037	Neg	FALSE	J	Fixed	FALSE	1	1	0	0	0	0	0	0	Pos	Pos	Neg	Neg	Neg
J026	HGR BAGATA	No	Neg	NA	Neg	Neg	Neg	Neg	Neg	Neg	Neg	0	0	0	0	Pos	Pos	0	0	2+	1+	NA	0	20/06/2015	NA	NA	Yes	53	Not ambiguous	Not ambiguous	3039	Neg	FALSE	J	Fixed	FALSE	0	0	0	0	0	0	1	1	Neg	Neg	Neg	Neg	Neg
J004	HGR/BAGATA	No	Neg	NA	Neg	Neg	NA	Neg	Neg	Neg	Neg	0	0	0	0	Pos	Neg	2+	0	3+	0	NA	0	19/06/2015	NA	NA	Yes	28	Not ambiguous	Not ambiguous	3041	Neg	FALSE	J	Fixed	FALSE	0	0	0	0	1	0	1	0	Neg	Neg	Neg	Neg	Pos
M508	HS DE KITOY	No	Neg	NA	Neg	Neg	NA	Neg	Neg	Pos	Pos	1+	1+	0	0	Pos	Pos	0	0	1+	1+	NA	0	04/08/2015	0.5	NA	Yes	8	Not ambiguous	Not ambiguous	3044	Neg	FALSE	M	Fixed	FALSE	1	1	0	0	0	0	1	1	Pos	Pos	Neg	Neg	Neg
M492	HS DE KITOY	No	Neg	NA	Neg	Neg	NA	Neg	Neg	Neg	Neg	0	0	0	0	Pos	Pos	0	2+	2+	0	NA	0	03/08/2015	NA	NA	Yes	38	Not ambiguous	Not ambiguous	3048	Neg	FALSE	M	Fixed	FALSE	0	0	0	0	0	1	1	0	Neg	Neg	Neg	Neg	Neg
D2175	UM/MOKALA	No	Neg	NA	Neg	Neg	NA	Neg	Neg	Neg	Neg	0	0	0	0	Pos	Pos	0	0	2+	2+	NA	0	28/07/2015	NA	NA	Yes	10	Not ambiguous	Not ambiguous	3051	Neg	FALSE	D	Mobile	FALSE	0	0	0	0	0	0	1	1	Neg	Neg	Neg	Neg	Neg
D2059	UM/MOKALA	No	Neg	NA	Neg	Neg	NA	Neg	Neg	Neg	Neg	0	0	0	0	Pos	Pos	0	0	2+	2+	NA	0	27/07/2015	NA	NA	Yes	55	Not ambiguous	Not ambiguous	3093	Neg	FALSE	D	Mobile	FALSE	0	0	0	0	0	0	1	1	Neg	Neg	Neg	Neg	Neg
D3804	MOKALA	No	NA	Neg	NA	NA	Pos	Pos	Pos	Neg	Neg	0	0	0	0	Pos	Pos	1+	1+	2+	2+	NA	0	06/08/2015	NA	2	Yes	1	Not ambiguous	Not ambiguous	3096	Pos	TRUE	D	Mobile	FALSE	0	0	0	0	1	1	1	1	Neg	Neg	Neg	Neg	Pos
D2503	UM/MOKALA	No	Neg	Pos	NA	Neg	Neg	Pos	Pos	Pos	Pos	3+	2+	3+	3+	Pos	Pos	2+	3+	4+	3+	NA	0	30/07/2015	NA	820	Yes	30	Not ambiguous	Not ambiguous	3098	Pos	TRUE	D	Mobile	FALSE	1	1	1	1	1	1	1	1	Pos	Pos	Pos	Pos	Pos
P109	HGR/MASIMANIMBA	No	Neg	NA	Neg	Neg	NA	Neg	Neg	Neg	Neg	0	0	0	0	Pos	Pos	1+	1+	2+	4+	NA	0	05/06/2015	NA	NA	Yes	53	Not ambiguous	Not ambiguous	3102	Neg	FALSE	P	Fixed	FALSE	0	0	0	0	1	1	1	1	Neg	Neg	Neg	Neg	Pos
P148	HGR/MASIMANIMBA	No	Neg	NA	Neg	Neg	NA	Neg	Neg	Neg	Neg	0	0	0	0	Pos	Pos	1+	2+	0	0	NA	0	08/06/2015	NA	NA	Yes	59	Not ambiguous	Not ambiguous	3106	Neg	FALSE	P	Fixed	FALSE	0	0	0	0	1	1	0	0	Neg	Neg	Neg	Neg	Pos
P156	HGR/MASIMANIMBA	No	Neg	NA	Neg	Neg	NA	Neg	Neg	Neg	Neg	0	0	0	0	Pos	Pos	1+	1+	0	0	NA	0	09/06/2015	NA	NA	Yes	25	Not ambiguous	Not ambiguous	3111	Neg	FALSE	P	Fixed	FALSE	0	0	0	0	1	1	0	0	Neg	Neg	Neg	Neg	Pos
P162	HGR/MASIMANIMBA	No	Neg	NA	Neg	Neg	NA	Neg	Neg	Neg	Neg	0	0	0	0	Pos	Pos	1+	1+	0	0	NA	0	09/06/2015	NA	NA	Yes	20	Not ambiguous	Not ambiguous	3115	Neg	FALSE	P	Fixed	FALSE	0	0	0	0	1	1	0	0	Neg	Neg	Neg	Neg	Pos
P172	HGR/MASIMANIMBA	No	Neg	NA	Neg	Neg	NA	Pos	Pos	Pos	Pos	2+	2+	0	0	Neg	Neg	0	0	0	0	NA	0	10/06/2015	NA	NA	Yes	32	Ambiguous	Ambiguous	3117	Neg	FALSE	P	Fixed	FALSE	1	1	0	0	0	0	0	0	Pos	Pos	Neg	Neg	Neg
P177	HGR/MASIMANIMBA	No	Neg	NA	Neg	Neg	NA	Pos	Pos	Neg	Neg	0	0	0	0	Pos	Pos	0	0	1+	1+	NA	0	10/06/2015	NA	NA	Yes	16	Not ambiguous	Not ambiguous	3120	Neg	FALSE	P	Fixed	FALSE	0	0	0	0	0	0	1	1	Neg	Neg	Neg	Neg	Neg
P178	HGR/MASIMANIMBA	No	Neg	NA	Neg	Neg	Neg	Pos	Pos	Neg	Neg	0	0	0	0	Neg	Neg	0	0	0	0	NA	0	10/06/2015	NA	NA	Yes	10	Ambiguous	Ambiguous	3122	Neg	FALSE	P	Fixed	FALSE	0	0	0	0	0	0	0	0	Neg	Neg	Neg	Neg	Neg
P476	HGR/MASIMANIMBA	No	Neg	NA	Neg	Neg	NA	Neg	Neg	Neg	Neg	0	0	0	0	Pos	Pos	1+	1+	1+	1+	NA	0	25/07/2015	NA	NA	Yes	24	Not ambiguous	Not ambiguous	3126	Neg	FALSE	P	Fixed	FALSE	0	0	0	0	1	1	1	1	Neg	Neg	Neg	Neg	Pos
P477	HGR/MASIMANIMBA	No	Neg	NA	Neg	Neg	NA	Neg	Neg	Pos	Pos	0	2+	2+	0	Pos	Pos	2+	3+	2+	2+	NA	0	25/07/2015	NA	NA	Yes	48	Not ambiguous	Not ambiguous	3128	Neg	FALSE	P	Fixed	FALSE	0	1	1	0	1	1	1	1	Neg	Pos	Pos	Neg	Pos
P484	HGR/MASIMANIMBA	No	Neg	NA	Neg	Neg	NA	Pos	Pos	Neg	Neg	0	0	0	0	Neg	Neg	0	0	0	0	NA	0	28/07/2015	NA	NA	Yes	17	Not ambiguous	Not ambiguous	3130	Neg	FALSE	P	Fixed	FALSE	0	0	0	0	0	0	0	0	Neg	Neg	Neg	Neg	Neg
P485	HGR/MASIMANIMBA	No	Neg	NA	Neg	Neg	NA	Pos	Pos	Neg	Neg	0	0	0	0	Neg	Neg	0	0	0	0	NA	0	28/07/2015	NA	NA	Yes	10	Not ambiguous	Not ambiguous	3132	Neg	FALSE	P	Fixed	FALSE	0	0	0	0	0	0	0	0	Neg	Neg	Neg	Neg	Neg
D2434	UM/MOKALA	No	Neg	NA	Neg	Neg	NA	Neg	Neg	Neg	Neg	0	0	0	0	Pos	Pos	0	0	2+	2+	NA	0	29/07/2015	NA	NA	Yes	8	Not ambiguous	Not ambiguous	3150	Neg	FALSE	D	Mobile	FALSE	0	0	0	0	0	0	1	1	Neg	Neg	Neg	Neg	Neg
D2373	UM/MOKALA	No	Neg	NA	Neg	Neg	NA	Neg	Neg	Neg	Neg	0	0	0	0	Pos	Pos	0	0	2+	2+	NA	0	29/07/2015	NA	NA	Yes	47	Not ambiguous	Not ambiguous	3158	Neg	FALSE	D	Mobile	FALSE	0	0	0	0	0	0	1	1	Neg	Neg	Neg	Neg	Neg
D2303	UM/MOKALA	No	Neg	NA	Neg	Neg	NA	Pos	Pos	Neg	Neg	0	0	0	0	Pos	Pos	3+	3+	2+	2+	NA	0	29/07/2015	NA	NA	Yes	67	Not ambiguous	Not ambiguous	3182	Neg	FALSE	D	Mobile	FALSE	0	0	0	0	1	1	1	1	Neg	Neg	Neg	Neg	Pos
D2267	UM/MOKALA	No	Neg	NA	Neg	Neg	NA	Pos	Pos	Neg	Neg	0	0	0	0	Neg	Neg	0	0	0	0	NA	0	28/07/2015	NA	NA	Yes	17	Not ambiguous	Ambiguous	3184	Neg	FALSE	D	Mobile	FALSE	0	0	0	0	0	0	0	0	Neg	Neg	Neg	Neg	Neg
Q217	HGR YASA BONGA	No	Neg	NA	Neg	Neg	NA	Neg	Neg	Pos	Pos	1+	1+	0	0	Neg	Neg	0	0	0	0	NA	0	17/06/2015	1	NA	Yes	30	Not ambiguous	Not ambiguous	3188	Neg	FALSE	Q	Fixed	FALSE	1	1	0	0	0	0	0	0	Pos	Pos	Neg	Neg	Neg
P516	HGR/MASIMANIMBA	No	Neg	NA	Neg	Neg	NA	Pos	Pos	Neg	Neg	0	0	0	0	Neg	Neg	0	0	0	0	NA	0	30/07/2015	NA	NA	Yes	28	Not ambiguous	Not ambiguous	3196	Neg	FALSE	P	Fixed	FALSE	0	0	0	0	0	0	0	0	Neg	Neg	Neg	Neg	Neg
P524	HGR/MASIMANIMBA	No	Neg	NA	Neg	Neg	NA	Neg	Neg	Neg	Neg	0	0	0	0	Pos	Pos	2+	2+	0	0	NA	0	03/08/2015	NA	NA	Yes	53	Not ambiguous	Not ambiguous	3200	Neg	FALSE	P	Fixed	FALSE	0	0	0	0	1	1	0	0	Neg	Neg	Neg	Neg	Pos
P529	HGR/MASIMANIMBA	No	Neg	NA	Neg	Neg	NA	Pos	Pos	Neg	Neg	0	0	0	0	Neg	Neg	0	0	0	0	NA	0	03/08/2015	NA	NA	Yes	22	Not ambiguous	Not ambiguous	3203	Neg	FALSE	P	Fixed	FALSE	0	0	0	0	0	0	0	0	Neg	Neg	Neg	Neg	Neg
P512	HGR/MASIMANIMBA	No	Neg	NA	Neg	Neg	NA	Neg	Neg	Neg	Neg	0	0	0	0	Pos	Pos	0	0	2+	2+	NA	0	30/07/2015	NA	NA	Yes	35	Not ambiguous	Not ambiguous	3206	Neg	FALSE	P	Fixed	FALSE	0	0	0	0	0	0	1	1	Neg	Neg	Neg	Neg	Neg
P508	HGR/MASIMANIMBA	No	Neg	NA	Neg	Neg	NA	Pos	Pos	Neg	Neg	0	0	0	0	Pos	Pos	0	0	2+	2+	NA	0	29/07/2015	NA	NA	Yes	32	Ambiguous	Ambiguous	3210	Neg	FALSE	P	Fixed	FALSE	0	0	0	0	0	0	1	1	Neg	Neg	Neg	Neg	Neg
P489	HGR/MASIMANIMBA	No	Neg	NA	Neg	Neg	NA	Pos	Pos	Neg	Neg	0	0	0	0	Neg	Neg	0	0	0	0	NA	0	28/07/2015	NA	NA	Yes	38	Not ambiguous	Not ambiguous	3214	Neg	FALSE	P	Fixed	FALSE	0	0	0	0	0	0	0	0	Neg	Neg	Neg	Neg	Neg
P487	HGR/MASIMANIMBA	No	Neg	NA	Neg	Neg	NA	Neg	Neg	Neg	Neg	0	0	0	0	Pos	Pos	0	0	4+	4+	NA	0	28/07/2015	NA	NA	Yes	6	Not ambiguous	Not ambiguous	3221	Neg	FALSE	P	Fixed	FALSE	0	0	0	0	0	0	1	1	Neg	Neg	Neg	Neg	Neg
P532	HGR/MASIMANIMBA	No	Neg	NA	Neg	Neg	NA	Pos	Pos	Neg	Neg	0	0	0	0	Neg	Neg	0	0	0	0	NA	0	03/08/2015	NA	NA	Yes	4	Ambiguous	Ambiguous	3337	Neg	FALSE	P	Fixed	FALSE	0	0	0	0	0	0	0	0	Neg	Neg	Neg	Neg	Neg
D1980	UM/MOKALA	No	Neg	NA	Neg	Neg	NA	Neg	Neg	Neg	Neg	0	0	0	0	Pos	Pos	2+	2+	0	0	NA	0	26/08/2015	NA	NA	Yes	14	Not ambiguous	Not ambiguous	3367	Neg	FALSE	D	Mobile	FALSE	0	0	0	0	1	1	0	0	Neg	Neg	Neg	Neg	Pos
L001	HS NKARA	No	Neg	NA	Neg	Neg	NA	Neg	Neg	Neg	Neg	0	0	0	0	Neg	Pos	0	1+	0	1+	NA	0	24/05/2015	NA	NA	Yes	1	Not ambiguous	Not ambiguous	3375	Neg	FALSE	L	Fixed	FALSE	0	0	0	0	0	1	0	1	Neg	Neg	Neg	Neg	Neg
L005	HS NKARA	No	Neg	NA	Neg	Neg	NA	Neg	Neg	Pos	Pos	1+	1+	0	1+	Neg	Pos	0	1+	0	1+	NA	0	24/05/2015	1	NA	Yes	24	Not ambiguous	Not ambiguous	3377	Neg	FALSE	L	Fixed	FALSE	1	1	0	1	0	1	0	1	Pos	Pos	Neg	Pos	Neg
L002	HS NKARA	No	Neg	NA	Neg	Neg	NA	Neg	Neg	Neg	Neg	0	0	0	0	Neg	Pos	0	1+	0	1+	NA	0	26/05/2015	NA	NA	Yes	27	Not ambiguous	Not ambiguous	3379	Neg	FALSE	L	Fixed	FALSE	0	0	0	0	0	1	0	1	Neg	Neg	Neg	Neg	Neg
L017	HS NKARA	No	Neg	NA	Neg	Neg	NA	Pos	Pos	Pos	Pos	1+	1+	1+	1+	Pos	Pos	1+	1+	1+	1+	NA	0	26/05/2015	2	NA	Yes	17	Not ambiguous	Not ambiguous	3381	Neg	FALSE	L	Fixed	FALSE	1	1	1	1	1	1	1	1	Pos	Pos	Pos	Pos	Pos
LO21	HS NKARA	No	Neg	NA	Neg	Neg	NA	Pos	Pos	Pos	Pos	3+	1+	1+	1+	Neg	Neg	0	0	0	0	NA	0	26/05/2015	NA	NA	Yes	14	Not ambiguous	Not ambiguous	3385	Neg	FALSE	L	Fixed	FALSE	1	1	1	1	0	0	0	0	Pos	Pos	Pos	Pos	Neg
L055	HS NKARA	No	Neg	NA	Neg	Neg	NA	Neg	Neg	Pos	Pos	1+	1+	1+	1+	Pos	Pos	1+	1+	2+	2+	NA	0	29/05/2015	1	NA	Yes	46	Not ambiguous	Not ambiguous	3389	Neg	FALSE	L	Fixed	FALSE	1	1	1	1	1	1	1	1	Pos	Pos	Pos	Pos	Pos
L069	HS NKARA	No	Neg	NA	Neg	Neg	NA	Neg	Neg	Pos	Pos	1+	1+	0	0	Neg	Neg	0	0	0	0	NA	0	30/05/2015	5	NA	Yes	43	Not ambiguous	Not ambiguous	3397	Neg	FALSE	L	Fixed	FALSE	1	1	0	0	0	0	0	0	Pos	Pos	Neg	Neg	Neg
L071	HS NKARA	No	Neg	NA	Neg	Neg	NA	Neg	Neg	Neg	Neg	0	0	0	0	Pos	Pos	1+	1+	0	0	NA	0	30/05/2015	NA	NA	Yes	3	Not ambiguous	Not ambiguous	3399	Neg	FALSE	L	Fixed	FALSE	0	0	0	0	1	1	0	0	Neg	Neg	Neg	Neg	Pos
L072	HS NKARA	No	Neg	NA	Neg	Neg	NA	Neg	Neg	Neg	Neg	0	0	0	0	Pos	Pos	1+	1+	1+	1+	NA	0	30/05/2015	NA	NA	Yes	7	Not ambiguous	Not ambiguous	3403	Neg	FALSE	L	Fixed	FALSE	0	0	0	0	1	1	1	1	Neg	Neg	Neg	Neg	Pos
L073	HS NKARA	No	Neg	NA	Neg	Neg	NA	Neg	Neg	Neg	Neg	0	0	0	0	Pos	Pos	0	0	1+	1+	NA	0	30/05/2015	NA	NA	Yes	18	Not ambiguous	Not ambiguous	3407	Neg	FALSE	L	Fixed	FALSE	0	0	0	0	0	0	1	1	Neg	Neg	Neg	Neg	Neg
L085	HS NKARA	No	Neg	NA	Neg	Neg	NA	Neg	Neg	Neg	Neg	0	0	0	0	Pos	Pos	1+	1+	1+	1+	NA	0	01/06/2015	NA	NA	Yes	33	Not ambiguous	Not ambiguous	3411	Neg	FALSE	L	Fixed	FALSE	0	0	0	0	1	1	1	1	Neg	Neg	Neg	Neg	Pos
L096	HS NKARA	No	Neg	NA	Neg	Neg	NA	Neg	Neg	Neg	Neg	0	0	0	0	Pos	Pos	1+	1+	0	0	NA	0	03/06/2015	NA	NA	Yes	17	Not ambiguous	Not ambiguous	3419	Neg	FALSE	L	Fixed	FALSE	0	0	0	0	1	1	0	0	Neg	Neg	Neg	Neg	Pos
L099	HS NKARA	No	Neg	NA	Neg	Neg	NA	Pos	Pos	Pos	Pos	2+	2+	1+	1+	Neg	Neg	0	0	0	0	NA	0	04/06/2015	NA	NA	Yes	24	Not ambiguous	Not ambiguous	3423	Neg	FALSE	L	Fixed	FALSE	1	1	1	1	0	0	0	0	Pos	Pos	Pos	Pos	Neg
L101	HS NKARA	No	Neg	NA	Neg	Neg	NA	Pos	Pos	Neg	Neg	0	0	0	0	Neg	Neg	0	0	0	0	NA	0	04/06/2015	NA	NA	Yes	57	Not ambiguous	Not ambiguous	3427	Neg	FALSE	L	Fixed	FALSE	0	0	0	0	0	0	0	0	Neg	Neg	Neg	Neg	Neg
L109	HS NKARA	No	Neg	NA	Neg	Neg	NA	Neg	Neg	Neg	Neg	0	0	0	0	Pos	Pos	0	0	4+	4+	NA	0	06/06/2015	NA	NA	Yes	7	Not ambiguous	Not ambiguous	3433	Neg	FALSE	L	Fixed	FALSE	0	0	0	0	0	0	1	1	Neg	Neg	Neg	Neg	Neg
L110	HS NKARA	No	Neg	NA	Neg	Neg	NA	Neg	Neg	Neg	Neg	0	0	0	0	Pos	Pos	1+	1+	0	0	NA	0	06/06/2015	NA	NA	Yes	30	Not ambiguous	Not ambiguous	3435	Neg	FALSE	L	Fixed	FALSE	0	0	0	0	1	1	0	0	Neg	Neg	Neg	Neg	Pos
L128	HS NKARA	No	Neg	NA	Neg	Neg	NA	Pos	Pos	Neg	Neg	0	0	0	0	Neg	Neg	0	0	0	0	NA	0	09/06/2015	NA	NA	Yes	22	Not ambiguous	Not ambiguous	3437	Neg	FALSE	L	Fixed	FALSE	0	0	0	0	0	0	0	0	Neg	Neg	Neg	Neg	Neg
L129	HS NKARA	No	Neg	NA	Neg	Neg	NA	Neg	Neg	Neg	Neg	0	0	0	0	Pos	Pos	0	0	1+	1+	NA	0	09/06/2015	NA	NA	Yes	25	Not ambiguous	Not ambiguous	3441	Neg	FALSE	L	Fixed	FALSE	0	0	0	0	0	0	1	1	Neg	Neg	Neg	Neg	Neg
L158	HS NKARA	No	Neg	NA	Neg	Neg	NA	Pos	Pos	Pos	Pos	1+	1+	0	0	Neg	Neg	0	0	0	0	NA	0	12/06/2015	1	NA	Yes	20	Not ambiguous	Not ambiguous	3445	Neg	FALSE	L	Fixed	FALSE	1	1	0	0	0	0	0	0	Pos	Pos	Neg	Neg	Neg
L161	HS NKARA	No	Neg	NA	Neg	Neg	NA	Neg	Neg	Neg	Neg	0	0	0	0	Pos	Pos	1+	1+	0	0	NA	0	12/06/2015	NA	NA	Yes	43	Not ambiguous	Not ambiguous	3447	Neg	FALSE	L	Fixed	FALSE	0	0	0	0	1	1	0	0	Neg	Neg	Neg	Neg	Pos
L173	HS NKARA	No	Neg	NA	Neg	Neg	NA	Pos	Pos	Pos	Pos	1+	1+	1+	1+	Pos	Pos	1+	1+	1+	1+	NA	0	15/06/2015	5	NA	Yes	22	Not ambiguous	Not ambiguous	3451	Neg	FALSE	L	Fixed	FALSE	1	1	1	1	1	1	1	1	Pos	Pos	Pos	Pos	Pos
L196	HS NKARA	No	Neg	NA	Neg	Neg	NA	Neg	Neg	Pos	Pos	1+	1+	1+	1+	Neg	Neg	0	0	0	0	NA	0	18/06/2015	25	NA	Yes	22	Not ambiguous	Not ambiguous	3455	Neg	FALSE	L	Fixed	FALSE	1	1	1	1	0	0	0	0	Pos	Pos	Pos	Pos	Neg
L206	HS NKARA	No	Neg	NA	Neg	Neg	NA	Pos	Pos	Pos	Pos	1+	1+	0	0	Neg	Neg	0	0	0	0	NA	0	19/06/2015	25	NA	Yes	20	Not ambiguous	Not ambiguous	3460	Neg	FALSE	L	Fixed	FALSE	1	1	0	0	0	0	0	0	Pos	Pos	Neg	Neg	Neg
L126	HS/NKARA	No	Neg	NA	Neg	Neg	NA	Pos	Pos	Neg	Neg	0	0	0	0	Neg	Neg	0	0	0	0	NA	0	09/06/2015	NA	NA	Yes	6	Not ambiguous	Not ambiguous	3532	Neg	FALSE	L	Fixed	FALSE	0	0	0	0	0	0	0	0	Neg	Neg	Neg	Neg	Neg
L462	HS NKARA	No	Neg	NA	Neg	Neg	NA	Neg	Neg	Neg	Neg	0	0	0	0	Pos	Pos	2+	2+	0	0	NA	0	13/08/2015	NA	NA	Yes	39	Not ambiguous	Not ambiguous	3547	Neg	FALSE	L	Fixed	FALSE	0	0	0	0	1	1	0	0	Neg	Neg	Neg	Neg	Pos
L453	HS NKARA	No	Neg	NA	Neg	Neg	NA	Neg	Neg	Neg	Neg	0	0	0	0	Pos	Pos	3+	3+	0	0	NA	0	04/08/2015	NA	NA	Yes	22	Not ambiguous	Not ambiguous	3550	Neg	FALSE	L	Fixed	FALSE	0	0	0	0	1	1	0	0	Neg	Neg	Neg	Neg	Pos
L448	HS NKARA	No	Neg	NA	Neg	Neg	NA	Pos	Pos	Neg	Neg	0	0	0	0	Neg	Neg	0	0	0	0	NA	0	04/08/2015	NA	NA	Yes	17	Not ambiguous	Not ambiguous	3553	Neg	FALSE	L	Fixed	FALSE	0	0	0	0	0	0	0	0	Neg	Neg	Neg	Neg	Neg
L446	HS NKARA	No	Neg	NA	Neg	Neg	NA	Neg	Neg	Neg	Neg	0	0	0	0	Pos	Pos	3+	3+	0	0	NA	0	03/08/2015	NA	NA	Yes	19	Not ambiguous	Not ambiguous	3556	Neg	FALSE	L	Fixed	FALSE	0	0	0	0	1	1	0	0	Neg	Neg	Neg	Neg	Pos
L397	HS NKARA	No	Neg	NA	Neg	Neg	NA	Neg	Neg	Neg	Neg	0	0	0	0	Pos	Pos	2+	2+	0	0	NA	0	25/07/2015	NA	NA	Yes	61	Not ambiguous	Not ambiguous	3572	Neg	FALSE	L	Fixed	FALSE	0	0	0	0	1	1	0	0	Neg	Neg	Neg	Neg	Pos
L395	HS NKARA	No	Neg	NA	Neg	Neg	NA	Neg	Neg	Pos	Pos	0	0	2+	2+	Neg	Neg	0	0	0	0	NA	0	25/07/2015	NA	NA	Yes	43	Not ambiguous	Not ambiguous	3575	Neg	FALSE	L	Fixed	FALSE	0	0	1	1	0	0	0	0	Neg	Neg	Pos	Pos	Neg
L411	HS NKARA	No	Neg	NA	Neg	Neg	NA	Pos	Pos	Neg	Neg	0	0	0	0	Neg	Neg	0	0	0	0	NA	0	28/07/2015	NA	NA	Yes	24	Not ambiguous	Not ambiguous	3577	Neg	FALSE	L	Fixed	FALSE	0	0	0	0	0	0	0	0	Neg	Neg	Neg	Neg	Neg
L436	HS NKARA	No	Neg	NA	Neg	Neg	NA	Neg	Neg	Neg	Neg	0	0	0	0	Pos	Pos	2+	2+	0	0	NA	0	01/08/2015	NA	NA	Yes	2	Not ambiguous	Not ambiguous	3584	Neg	FALSE	L	Fixed	FALSE	0	0	0	0	1	1	0	0	Neg	Neg	Neg	Neg	Pos
L341	HS NKARA	No	Neg	NA	Neg	Neg	NA	Neg	Neg	Pos	Pos	1+	1+	1+	1+	Neg	Neg	0	0	0	0	NA	0	15/07/2015	3	NA	Yes	18	Not ambiguous	Not ambiguous	3592	Neg	FALSE	L	Fixed	FALSE	1	1	1	1	0	0	0	0	Pos	Pos	Pos	Pos	Neg
L383	HS NKARA	No	Neg	NA	Neg	Neg	NA	Neg	Neg	Pos	Pos	1+	1+	0	0	Neg	Neg	0	0	0	0	NA	0	22/07/2015	1	NA	Yes	36	Not ambiguous	Not ambiguous	3596	Neg	FALSE	L	Fixed	FALSE	1	1	0	0	0	0	0	0	Pos	Pos	Neg	Neg	Neg
L369	HS NKARA	No	Neg	NA	Neg	Neg	NA	Pos	Pos	Pos	Pos	2+	2+	2+	2+	Neg	Neg	0	0	0	0	NA	0	21/07/2015	NA	NA	Yes	27	Not ambiguous	Not ambiguous	3599	Neg	FALSE	L	Fixed	FALSE	1	1	1	1	0	0	0	0	Pos	Pos	Pos	Pos	Neg
L366	HS NKARA	No	Neg	NA	Neg	Neg	NA	Pos	Pos	Pos	Pos	2+	2+	1+	1+	Neg	Neg	0	0	0	0	NA	0	20/07/2015	NA	NA	Yes	8	Not ambiguous	Not ambiguous	3601	Neg	FALSE	L	Fixed	FALSE	1	1	1	1	0	0	0	0	Pos	Pos	Pos	Pos	Neg
L361	HS NKARA	No	Neg	Neg	Neg	Neg	NA	Neg	Neg	Neg	Neg	0	0	0	0	Pos	Pos	2+	2+	0	0	NA	0	19/07/2015	NA	2	Yes	18	Not ambiguous	Not ambiguous	3604	Neg	FALSE	L	Fixed	FALSE	0	0	0	0	1	1	0	0	Neg	Neg	Neg	Neg	Pos
L348	HS NKARA	No	Neg	NA	Neg	Neg	NA	Neg	Neg	Neg	Neg	0	0	0	0	Pos	Pos	1+	1+	0	0	NA	0	15/07/2015	NA	NA	Yes	17	Not ambiguous	Not ambiguous	3607	Neg	FALSE	L	Fixed	FALSE	0	0	0	0	1	1	0	0	Neg	Neg	Neg	Neg	Pos
L210	HS NKARA	No	Neg	NA	Neg	Neg	NA	Neg	Neg	Neg	Neg	0	0	0	0	Pos	Pos	0	0	1+	1+	NA	0	19/06/2015	NA	NA	Yes	60	Not ambiguous	Not ambiguous	3614	Neg	FALSE	L	Fixed	FALSE	0	0	0	0	0	0	1	1	Neg	Neg	Neg	Neg	Neg
L221	HS NKARA	No	Neg	NA	Neg	Neg	NA	Neg	Neg	Neg	Neg	0	0	0	0	Pos	Pos	0	0	1+	1+	NA	0	21/06/2015	NA	NA	Yes	30	Not ambiguous	Not ambiguous	3618	Neg	FALSE	L	Fixed	FALSE	0	0	0	0	0	0	1	1	Neg	Neg	Neg	Neg	Neg
L235	HS NKARA	No	Neg	NA	Neg	Neg	NA	Neg	Neg	Pos	Pos	1+	1+	1+	1+	Neg	Neg	0	0	0	0	NA	0	22/06/2015	5	NA	Yes	35	Not ambiguous	Not ambiguous	3621	Neg	FALSE	L	Fixed	FALSE	1	1	1	1	0	0	0	0	Pos	Pos	Pos	Pos	Neg
L340	HS NKARA	No	Neg	NA	Neg	Neg	NA	Neg	Neg	Neg	Neg	0	0	0	0	Pos	Pos	2+	2+	2+	2+	NA	0	14/07/2015	NA	NA	Yes	6	Not ambiguous	Not ambiguous	3624	Neg	FALSE	L	Fixed	FALSE	0	0	0	0	1	1	1	1	Neg	Neg	Neg	Neg	Pos
Q408	HGR/YASA-BONGA	No	Neg	NA	Neg	Neg	NA	Neg	Neg	Pos	Pos	1+	1+	0	0	Neg	Neg	0	0	0	0	NA	0	29/06/2015	25	NA	Yes	17	Not ambiguous	Not ambiguous	3630	Neg	FALSE	Q	Fixed	FALSE	1	1	0	0	0	0	0	0	Pos	Pos	Neg	Neg	Neg
Q375	HGR/YASA-BONGA	No	Neg	NA	Neg	Neg	NA	Pos	Pos	Neg	Neg	0	0	0	0	Pos	Pos	1+	1+	0	0	NA	0	26/06/2015	NA	NA	Yes	19	Not ambiguous	Not ambiguous	3632	Neg	FALSE	Q	Fixed	FALSE	0	0	0	0	1	1	0	0	Neg	Neg	Neg	Neg	Pos
Q372	HGR YASA-BONGA	No	Neg	NA	Neg	Neg	Neg	Pos	Pos	Neg	Neg	0	0	0	0	Pos	Pos	1+	1+	0	0	NA	0	26/06/2015	1	NA	Yes	8	Not ambiguous	Not ambiguous	3635	Neg	FALSE	Q	Fixed	FALSE	0	0	0	0	1	1	0	0	Neg	Neg	Neg	Neg	Pos
Q363	HGR/YASA-BONGA	No	Neg	NA	Neg	Neg	NA	Neg	Neg	Neg	Neg	0	0	0	0	Pos	Pos	3+	3+	0	0	NA	0	25/06/2015	NA	NA	Yes	25	Not ambiguous	Not ambiguous	3638	Neg	FALSE	Q	Fixed	FALSE	0	0	0	0	1	1	0	0	Neg	Neg	Neg	Neg	Pos
Q338	HGR/YASA-BONGA	No	Neg	NA	Neg	Neg	NA	Neg	Neg	Neg	Neg	0	0	0	0	Pos	Pos	0	0	1+	1+	NA	0	24/06/2015	NA	NA	Yes	32	Not ambiguous	Not ambiguous	3642	Neg	FALSE	Q	Fixed	FALSE	0	0	0	0	0	0	1	1	Neg	Neg	Neg	Neg	Neg
Q601	HGR/YASA-BONGA	No	Neg	NA	Neg	Neg	Neg	Neg	Neg	Neg	Neg	0	0	0	0	Pos	Pos	1+	1+	1+	1+	NA	0	24/07/2015	NA	NA	Yes	5	Not ambiguous	Not ambiguous	3646	Neg	FALSE	Q	Fixed	FALSE	0	0	0	0	1	1	1	1	Neg	Neg	Neg	Neg	Pos
Q606	HGR/BONGA-BONGA	No	Neg	NA	Neg	Neg	NA	Neg	Neg	Neg	Neg	0	0	0	0	Pos	Pos	2+	2+	2+	2+	NA	0	27/07/2015	NA	NA	Yes	5	Not ambiguous	Not ambiguous	3649	Neg	FALSE	Q	Fixed	FALSE	0	0	0	0	1	1	1	1	Neg	Neg	Neg	Neg	Pos
Q618	HGR/YASA-BONGA	No	Neg	NA	Neg	Neg	Neg	Neg	Neg	Neg	Neg	0	0	0	0	Pos	Pos	0	0	1+	1+	NA	0	27/07/2015	NA	NA	Yes	30	Not ambiguous	Not ambiguous	3652	Neg	FALSE	Q	Fixed	FALSE	0	0	0	0	0	0	1	1	Neg	Neg	Neg	Neg	Neg
Q644	HGR/YASA-BONGA	No	Neg	NA	Neg	Neg	Neg	Neg	Neg	Neg	Neg	0	0	0	0	Pos	Pos	2+	2+	1+	1+	NA	0	28/07/2015	NA	NA	Yes	15	Not ambiguous	Not ambiguous	3655	Neg	FALSE	Q	Fixed	FALSE	0	0	0	0	1	1	1	1	Neg	Neg	Neg	Neg	Pos
Q012	HGR/YASA-BONGA	No	Neg	NA	Neg	Neg	NA	Neg	Neg	Neg	Neg	0	0	0	0	Neg	Neg	0	0	0	0	NA	0	03/06/2015	NA	NA	Yes	21	Not ambiguous	Not ambiguous	3658	Neg	FALSE	Q	Fixed	FALSE	0	0	0	0	0	0	0	0	Neg	Neg	Neg	Neg	Neg
B059	KWAMOUTH	No	Pos	Neg	Neg	Neg	NA	Neg	Neg	Neg	Neg	0	0	0	0	Pos	Pos	0	0	2+	2+	NA	0	21/07/2015	NA	2	Yes	57	Not ambiguous	Not ambiguous	3660	Pos	TRUE	B	Mobile	FALSE	0	0	0	0	0	0	1	1	Neg	Neg	Neg	Neg	Neg
B118	KWAMOUTH	No	Pos	Neg	NA	NA	NA	Pos	Pos	Neg	Neg	0	0	0	0	Neg	Neg	0	0	0	0	NA	0	21/07/2015	NA	2	Yes	3	Not ambiguous	Not ambiguous	3662	Pos	TRUE	B	Mobile	FALSE	0	0	0	0	0	0	0	0	Neg	Neg	Neg	Neg	Neg
B349	UM/KWAMOUTH	Yes	Pos	Neg	NA	NA	NA	Pos	Pos	Neg	Neg	0	0	0	0	Neg	Neg	0	0	0	0	NA	0	21/07/2015	NA	3	Yes	68	Not ambiguous	Not ambiguous	3664	Pos	TRUE	B	Mobile	FALSE	0	0	0	0	0	0	0	0	Neg	Neg	Neg	Neg	Neg
B350	UM/KWAMOUTH	No	Pos	Neg	NA	NA	NA	Pos	Pos	Neg	Neg	0	0	0	0	Neg	Neg	0	0	0	0	NA	0	21/07/2015	NA	3	Yes	30	Not ambiguous	Not ambiguous	3666	Pos	TRUE	B	Mobile	FALSE	0	0	0	0	0	0	0	0	Neg	Neg	Neg	Neg	Neg
B378	KWAMOUTH	No	Pos	Neg	NA	NA	NA	Neg	Neg	Neg	Neg	0	0	0	0	Pos	Pos	0	0	2+	2+	NA	0	21/07/2015	NA	2	Yes	24	Not ambiguous	Not ambiguous	3669	Pos	TRUE	B	Mobile	FALSE	0	0	0	0	0	0	1	1	Neg	Neg	Neg	Neg	Neg
B402	KWAMOUTH	No	Pos	Neg	NA	NA	NA	Pos	Pos	Pos	Pos	2+	2+	0	0	Neg	Neg	0	0	0	0	NA	0	21/07/2015	NA	2	Yes	26	Not ambiguous	Not ambiguous	3672	Pos	TRUE	B	Mobile	FALSE	1	1	0	0	0	0	0	0	Pos	Pos	Neg	Neg	Neg
B465	KWAMOUTH	No	Pos	Neg	NA	NA	NA	Pos	Pos	Pos	Pos	1+	1+	2+	0	Neg	Neg	0	0	0	0	NA	0	21/07/2015	1	3	Yes	25	Not ambiguous	Not ambiguous	3675	Pos	TRUE	B	Mobile	FALSE	1	1	1	0	0	0	0	0	Pos	Pos	Pos	Neg	Neg
B495	KWAMOUTH	No	Pos	Neg	NA	NA	NA	Pos	Pos	Neg	Neg	0	0	0	0	Pos	Pos	0	0	2+	2+	NA	0	21/07/2015	NA	1	Yes	52	Not ambiguous	Not ambiguous	3679	Pos	TRUE	B	Mobile	FALSE	0	0	0	0	0	0	1	1	Neg	Neg	Neg	Neg	Neg
B972	KWAMOUTH	No	Pos	Neg	NA	NA	NA	Pos	Pos	Pos	Pos	0	0	2+	2+	Neg	Neg	0	0	0	0	NA	0	21/07/2015	NA	3	Yes	11	Not ambiguous	Not ambiguous	3682	Pos	TRUE	B	Mobile	FALSE	0	0	1	1	0	0	0	0	Neg	Neg	Pos	Pos	Neg
B984	KWAMOUTH	No	Pos	Neg	NA	NA	NA	Pos	Pos	Pos	Pos	0	0	2+	2+	Neg	Neg	0	0	0	0	NA	0	21/07/2015	NA	2	Yes	11	Not ambiguous	Not ambiguous	3685	Pos	TRUE	B	Mobile	FALSE	0	0	1	1	0	0	0	0	Neg	Neg	Pos	Pos	Neg
B1186	KWAMOUTH	No	NA	Neg	NA	NA	Pos	Neg	Neg	Pos	Pos	0	0	2+	2+	Neg	Neg	0	0	0	0	NA	0	21/07/2015	NA	2	Yes	11	Not ambiguous	Not ambiguous	3688	Pos	TRUE	B	Mobile	FALSE	0	0	1	1	0	0	0	0	Neg	Neg	Pos	Pos	Neg
B1308	KWAMOUTH	Yes	Pos	Neg	NA	NA	NA	Pos	Pos	Neg	Neg	0	0	0	0	Neg	Neg	0	0	0	0	NA	0	21/07/2015	NA	3	Yes	52	Not ambiguous	Not ambiguous	3691	Pos	TRUE	B	Mobile	FALSE	0	0	0	0	0	0	0	0	Neg	Neg	Neg	Neg	Neg
B1354	KWAMOUTH	No	NA	Neg	NA	NA	Pos	Pos	Pos	Neg	Neg	0	0	0	0	Neg	Neg	0	0	0	0	NA	0	21/07/2015	NA	1	Yes	10	Not ambiguous	Not ambiguous	3694	Pos	TRUE	B	Mobile	FALSE	0	0	0	0	0	0	0	0	Neg	Neg	Neg	Neg	Neg
B040	KWAMOUTH	No	Pos	Neg	NA	NA	NA	Neg	Neg	Pos	Pos	0	2+	1+	2+	Neg	Neg	0	0	0	0	NA	0	21/07/2015	NA	2	Yes	11	Not ambiguous	Not ambiguous	3697	Pos	TRUE	B	Mobile	FALSE	0	1	1	1	0	0	0	0	Neg	Pos	Pos	Pos	Neg
B028	UM/KWAMOUTH	No	Neg	NA	Neg	Neg	NA	Neg	Neg	Pos	Pos	1+	1+	0	0	Neg	Neg	0	0	0	0	NA	0	21/07/2015	1	NA	Yes	48	Not ambiguous	Not ambiguous	3701	Neg	FALSE	B	Mobile	FALSE	1	1	0	0	0	0	0	0	Pos	Pos	Neg	Neg	Neg
B060	UM/KWAMOUTH	No	Neg	NA	Neg	Neg	NA	Pos	Pos	Neg	Neg	0	0	0	0	Neg	Neg	0	0	0	0	NA	0	21/07/2015	NA	NA	Yes	1	Not ambiguous	Not ambiguous	3704	Neg	FALSE	B	Mobile	FALSE	0	0	0	0	0	0	0	0	Neg	Neg	Neg	Neg	Neg
B063	KWAMOUTH	No	Neg	NA	Neg	Neg	NA	Pos	Pos	Neg	Neg	0	0	0	0	Neg	Neg	0	0	0	0	NA	0	21/07/2015	NA	NA	Yes	37	Not ambiguous	Not ambiguous	3707	Neg	FALSE	B	Mobile	FALSE	0	0	0	0	0	0	0	0	Neg	Neg	Neg	Neg	Neg
B095	KWAMOUTH	No	Neg	NA	Neg	Neg	NA	Neg	Neg	Neg	Neg	0	0	0	0	Pos	Pos	2+	2+	0	0	NA	0	21/07/2015	NA	NA	Yes	9	Not ambiguous	Not ambiguous	3710	Neg	FALSE	B	Mobile	FALSE	0	0	0	0	1	1	0	0	Neg	Neg	Neg	Neg	Pos
B128	KWAMOUTH	No	Neg	NA	Neg	Neg	NA	Neg	Neg	Neg	Neg	0	0	0	0	Pos	Pos	2+	2+	0	0	NA	0	21/07/2015	NA	NA	Yes	33	Not ambiguous	Not ambiguous	3719	Neg	FALSE	B	Mobile	FALSE	0	0	0	0	1	1	0	0	Neg	Neg	Neg	Neg	Pos
B236	KWAMOUTH	No	Neg	NA	Neg	Neg	NA	Neg	Neg	Neg	Neg	0	0	0	0	Pos	Pos	0	0	2+	2+	NA	0	21/07/2015	NA	NA	Yes	13	Not ambiguous	Not ambiguous	3722	Neg	FALSE	B	Mobile	FALSE	0	0	0	0	0	0	1	1	Neg	Neg	Neg	Neg	Neg
B412	UM/KWAMOUTH	No	Neg	NA	Neg	Neg	NA	Neg	Neg	Neg	Neg	0	0	0	0	Pos	Pos	4+	4+	0	0	NA	0	21/07/2015	NA	NA	Yes	36	Not ambiguous	Not ambiguous	3730	Neg	FALSE	B	Mobile	FALSE	0	0	0	0	1	1	0	0	Neg	Neg	Neg	Neg	Pos
B468	KWAMOUTH	No	Neg	NA	Neg	Neg	NA	Neg	Neg	Neg	Neg	0	0	0	0	Pos	Pos	2+	2+	0	0	NA	0	21/07/2015	NA	NA	Yes	10	Not ambiguous	Not ambiguous	3739	Neg	FALSE	B	Mobile	FALSE	0	0	0	0	1	1	0	0	Neg	Neg	Neg	Neg	Pos
B469	KWAMOUTH	No	Neg	NA	Neg	Neg	NA	Neg	Neg	Neg	Neg	0	0	0	0	Pos	Pos	0	0	2+	2+	NA	0	21/07/2015	NA	NA	Yes	83	Not ambiguous	Not ambiguous	3743	Neg	FALSE	B	Mobile	FALSE	0	0	0	0	0	0	1	1	Neg	Neg	Neg	Neg	Neg
B583	KWAMOUTH	No	Neg	NA	Neg	Neg	NA	Pos	Pos	Neg	Neg	0	0	0	0	Neg	Neg	0	0	0	0	NA	0	21/07/2015	NA	NA	Yes	47	Not ambiguous	Not ambiguous	3746	Neg	FALSE	B	Mobile	FALSE	0	0	0	0	0	0	0	0	Neg	Neg	Neg	Neg	Neg
B588	KWAMOUTH	No	Neg	NA	Neg	Neg	NA	Pos	Pos	Neg	Neg	0	0	0	0	Neg	Neg	0	0	0	0	NA	0	21/07/2015	NA	NA	Yes	3	Not ambiguous	Not ambiguous	3750	Neg	FALSE	B	Mobile	FALSE	0	0	0	0	0	0	0	0	Neg	Neg	Neg	Neg	Neg
B900	KWAMOUTH	No	Neg	NA	Neg	Neg	NA	Neg	Neg	Neg	Neg	0	0	0	0	Pos	Pos	0	0	2+	2+	NA	0	21/07/2015	NA	NA	Yes	1	Not ambiguous	Not ambiguous	3753	Neg	FALSE	B	Mobile	FALSE	0	0	0	0	0	0	1	1	Neg	Neg	Neg	Neg	Neg
B910	KWAMOUTH	No	Neg	NA	Neg	Neg	NA	Neg	Neg	Neg	Neg	0	0	0	0	Pos	Pos	0	0	2+	2+	NA	0	21/07/2015	NA	NA	Yes	11	Not ambiguous	Not ambiguous	3757	Neg	FALSE	B	Mobile	FALSE	0	0	0	0	0	0	1	1	Neg	Neg	Neg	Neg	Neg
B999	KWAMOUTH	No	Neg	NA	Neg	Neg	NA	Pos	Pos	Neg	Neg	0	0	0	0	Neg	Neg	0	0	0	0	NA	0	21/07/2015	NA	NA	Yes	29	Not ambiguous	Not ambiguous	3760	Neg	FALSE	B	Mobile	FALSE	0	0	0	0	0	0	0	0	Neg	Neg	Neg	Neg	Neg
B1051	KWAMOUTH	No	Neg	NA	Neg	Neg	NA	Neg	Neg	Pos	Pos	2+	2+	0	0	Neg	Neg	0	0	0	0	NA	0	21/07/2015	NA	NA	Yes	3	Not ambiguous	Not ambiguous	3764	Neg	FALSE	B	Mobile	FALSE	1	1	0	0	0	0	0	0	Pos	Pos	Neg	Neg	Neg
B1173	KWAMOUTH	No	Neg	NA	Neg	Neg	NA	Neg	Neg	Neg	Neg	0	0	0	0	Pos	Pos	0	0	2+	2+	NA	0	21/07/2015	NA	NA	Yes	6	Not ambiguous	Not ambiguous	3766	Neg	FALSE	B	Mobile	FALSE	0	0	0	0	0	0	1	1	Neg	Neg	Neg	Neg	Neg
B1360	KWAMOUTH	No	Neg	NA	Neg	Neg	NA	Neg	Neg	Neg	Neg	0	0	0	0	Pos	Pos	2+	2+	0	0	NA	0	21/07/2015	NA	NA	Yes	11	Not ambiguous	Not ambiguous	3768	Neg	FALSE	B	Mobile	FALSE	0	0	0	0	1	1	0	0	Neg	Neg	Neg	Neg	Pos
B1378	KWAMOUTH	No	Neg	NA	Neg	Neg	NA	Neg	Neg	Pos	Pos	2+	2+	2+	2+	Neg	Neg	0	0	0	0	NA	0	21/07/2015	NA	NA	Yes	32	Not ambiguous	Not ambiguous	3770	Neg	FALSE	B	Mobile	FALSE	1	1	1	1	0	0	0	0	Pos	Pos	Pos	Pos	Neg
Q177	HGR YASA-BONGA	No	Neg	NA	Neg	Neg	NA	Neg	Neg	Pos	Pos	1+	1+	0	0	Neg	Neg	0	0	0	0	NA	0	15/06/2015	5	NA	Yes	45	Not ambiguous	Not ambiguous	3798	Neg	FALSE	Q	Fixed	FALSE	1	1	0	0	0	0	0	0	Pos	Pos	Neg	Neg	Neg
A1618	UM/BDD	No	Neg	NA	Neg	Neg	NA	Neg	Neg	Neg	Neg	0	0	0	0	Pos	Pos	0	0	2+	2+	NA	0	21/07/2015	NA	NA	Yes	13	Not ambiguous	Not ambiguous	3801	Neg	FALSE	A	Mobile	FALSE	0	0	0	0	0	0	1	1	Neg	Neg	Neg	Neg	Neg
A1794	UM/BDD	No	Neg	NA	Neg	Neg	NA	Neg	Neg	Neg	Neg	0	0	0	0	Pos	Pos	0	0	3+	4+	NA	0	21/07/2015	NA	NA	Yes	39	Not ambiguous	Not ambiguous	3803	Neg	FALSE	A	Mobile	FALSE	0	0	0	0	0	0	1	1	Neg	Neg	Neg	Neg	Neg
A1710	UM/BDD	No	Neg	NA	Neg	Neg	NA	Neg	Neg	Neg	Neg	0	0	0	0	Pos	Pos	2+	3+	2+	2+	NA	0	21/07/2015	NA	NA	Yes	8	Not ambiguous	Not ambiguous	3805	Neg	FALSE	A	Mobile	FALSE	0	0	0	0	1	1	1	1	Neg	Neg	Neg	Neg	Pos
A1613	UM/BDD	No	Neg	NA	Neg	Neg	Neg	Neg	Neg	Neg	Neg	0	0	0	0	Neg	Neg	0	0	0	0	NA	0	21/07/2015	NA	NA	Yes	80	Not ambiguous	Not ambiguous	3807	Neg	FALSE	A	Mobile	FALSE	0	0	0	0	0	0	0	0	Neg	Neg	Neg	Neg	Neg
A1761	UM/BDD	No	Neg	NA	Neg	Neg	NA	Pos	Pos	Neg	Neg	0	0	0	0	Neg	Neg	0	0	0	0	NA	0	21/07/2015	NA	NA	Yes	32	Not ambiguous	Not ambiguous	3809	Neg	FALSE	A	Mobile	FALSE	0	0	0	0	0	0	0	0	Neg	Neg	Neg	Neg	Neg
A1969	UM/BDD	No	Neg	NA	Neg	Neg	Neg	Pos	Pos	Neg	Neg	0	0	0	0	Neg	Neg	0	0	0	0	NA	0	22/07/2015	NA	NA	Yes	16	Not ambiguous	Not ambiguous	3811	Neg	FALSE	A	Mobile	FALSE	0	0	0	0	0	0	0	0	Neg	Neg	Neg	Neg	Neg
A2964	UM/BDD	No	Neg	NA	Neg	Neg	NA	Neg	Neg	Pos	Pos	1+	0	1+	1+	Neg	Neg	0	0	0	0	NA	0	29/07/2015	25	NA	Yes	12	Not ambiguous	Not ambiguous	3813	Neg	FALSE	A	Mobile	FALSE	1	0	1	1	0	0	0	0	Pos	Neg	Pos	Pos	Neg
A1839	UM/BDD	No	Neg	NA	Neg	Neg	Neg	Neg	Neg	Neg	Neg	0	0	0	0	Neg	Pos	0	2+	0	0	NA	0	21/07/2015	NA	NA	Yes	5	Not ambiguous	Not ambiguous	3815	Neg	FALSE	A	Mobile	FALSE	0	0	0	0	0	1	0	0	Neg	Neg	Neg	Neg	Neg
A1687	UM/BDD	No	Neg	NA	Neg	Neg	NA	Neg	Neg	Neg	Neg	0	0	0	0	Pos	Pos	0	0	2+	2+	NA	0	22/07/2015	NA	NA	Yes	8	Not ambiguous	Not ambiguous	3817	Neg	FALSE	A	Mobile	FALSE	0	0	0	0	0	0	1	1	Neg	Neg	Neg	Neg	Neg
A3348	UM/BDD	No	Neg	NA	Neg	Neg	NA	Neg	Neg	Neg	Neg	0	0	0	0	Neg	Neg	0	0	0	0	NA	0	29/07/2015	NA	NA	Yes	15	Not ambiguous	Not ambiguous	3819	Neg	FALSE	A	Mobile	FALSE	0	0	0	0	0	0	0	0	Neg	Neg	Neg	Neg	Neg
A1804	UM/BDD	No	Neg	NA	Neg	Neg	Neg	Pos	Pos	Neg	Neg	0	0	0	0	Neg	Neg	0	0	0	0	NA	0	21/07/2015	NA	NA	Yes	10	Not ambiguous	Not ambiguous	3821	Neg	FALSE	A	Mobile	FALSE	0	0	0	0	0	0	0	0	Neg	Neg	Neg	Neg	Neg
A3216	UM/BDD	No	Neg	NA	Neg	Neg	NA	Neg	Neg	Pos	Pos	1+	1+	1+	1+	Neg	Neg	0	0	0	0	NA	0	29/07/2015	1	NA	Yes	1	Not ambiguous	Not ambiguous	3823	Neg	FALSE	A	Mobile	FALSE	1	1	1	1	0	0	0	0	Pos	Pos	Pos	Pos	Neg
A1923	UM/BDD	No	Neg	NA	Neg	Neg	NA	Pos	Pos	Neg	Neg	0	0	0	0	Neg	Neg	0	0	0	0	NA	0	22/07/2015	NA	NA	Yes	18	Not ambiguous	Not ambiguous	3825	Neg	FALSE	A	Mobile	FALSE	0	0	0	0	0	0	0	0	Neg	Neg	Neg	Neg	Neg
A1739	UM/BDD	No	Neg	NA	Neg	Neg	NA	Neg	Neg	Neg	Neg	0	0	0	0	Pos	Pos	2+	2+	2+	0	NA	0	21/07/2015	NA	NA	Yes	55	Not ambiguous	Not ambiguous	3827	Neg	FALSE	A	Mobile	FALSE	0	0	0	0	1	1	1	0	Neg	Neg	Neg	Neg	Pos
A1697	UM/BDD	No	Neg	NA	Neg	Neg	NA	Neg	Neg	Neg	Neg	0	0	0	0	Neg	Neg	0	0	0	0	NA	0	21/07/2015	NA	NA	Yes	78	Not ambiguous	Not ambiguous	3829	Neg	FALSE	A	Mobile	FALSE	0	0	0	0	0	0	0	0	Neg	Neg	Neg	Neg	Neg
A1846	UM/BDD	No	Neg	NA	Neg	Neg	NA	Neg	Neg	Neg	Neg	0	0	0	0	Pos	Pos	2+	3+	0	0	NA	0	21/07/2015	NA	NA	Yes	6	Not ambiguous	Not ambiguous	3831	Neg	FALSE	A	Mobile	FALSE	0	0	0	0	1	1	0	0	Neg	Neg	Neg	Neg	Pos
A1712	UM/BDD	No	Neg	NA	Neg	Neg	Neg	Neg	Neg	Neg	Neg	0	0	0	0	Pos	Pos	3+	2+	0	0	NA	0	21/07/2015	NA	NA	Yes	34	Not ambiguous	Not ambiguous	3833	Neg	FALSE	A	Mobile	FALSE	0	0	0	0	1	1	0	0	Neg	Neg	Neg	Neg	Pos
A1757	UM/BDD	No	Neg	NA	Neg	Neg	NA	Pos	Pos	Neg	Neg	0	0	0	0	Neg	Neg	0	0	0	0	NA	0	22/07/2015	NA	NA	Yes	15	Not ambiguous	Not ambiguous	3835	Neg	FALSE	A	Mobile	FALSE	0	0	0	0	0	0	0	0	Neg	Neg	Neg	Neg	Neg
A1662	UM/BDD	No	Neg	NA	Neg	Neg	NA	Neg	Neg	Pos	Pos	2+	2+	0	0	Neg	Neg	0	0	0	0	NA	0	21/07/2015	NA	NA	Yes	73	Not ambiguous	Not ambiguous	3837	Neg	FALSE	A	Mobile	FALSE	1	1	0	0	0	0	0	0	Pos	Pos	Neg	Neg	Neg
A1962	UM/BDD	No	Neg	NA	Neg	Neg	NA	Pos	Pos	Pos	Pos	1+	1+	1+	1+	Pos	Pos	2+	2+	0	0	NA	0	22/07/2015	1	NA	Yes	32	Not ambiguous	Not ambiguous	3839	Neg	FALSE	A	Mobile	FALSE	1	1	1	1	1	1	0	0	Pos	Pos	Pos	Pos	Pos
A1630	UM/BDD	No	Neg	NA	Neg	Neg	NA	Neg	Neg	Neg	Neg	0	0	0	0	Pos	Pos	0	0	4+	3+	NA	0	21/07/2015	NA	NA	Yes	5	Not ambiguous	Not ambiguous	3841	Neg	FALSE	A	Mobile	FALSE	0	0	0	0	0	0	1	1	Neg	Neg	Neg	Neg	Neg
A1631	UM/BDD	No	Neg	NA	Neg	Neg	NA	Pos	Pos	Neg	Neg	0	0	0	0	Neg	Neg	0	0	0	0	NA	0	21/07/2015	NA	NA	Yes	27	Not ambiguous	Not ambiguous	3843	Neg	FALSE	A	Mobile	FALSE	0	0	0	0	0	0	0	0	Neg	Neg	Neg	Neg	Neg
A1961	UM/BDD	No	Neg	NA	Neg	Neg	NA	Pos	Pos	Neg	Neg	0	0	0	0	Pos	Pos	0	1+	1+	1+	NA	0	22/07/2015	NA	NA	Yes	11	Not ambiguous	Not ambiguous	3845	Neg	FALSE	A	Mobile	FALSE	0	0	0	0	0	1	1	1	Neg	Neg	Neg	Neg	Neg
A2873	UM/BDD	No	Neg	NA	Neg	Neg	NA	Neg	Neg	Neg	Neg	0	0	0	0	Pos	Pos	0	0	2+	2+	NA	0	28/07/2015	NA	NA	Yes	42	Not ambiguous	Not ambiguous	3847	Neg	FALSE	A	Mobile	FALSE	0	0	0	0	0	0	1	1	Neg	Neg	Neg	Neg	Neg
A2826	UM/BDD	No	Neg	NA	Neg	Neg	NA	Neg	Neg	Neg	Neg	0	0	0	0	Neg	Neg	0	0	0	0	NA	0	25/07/2015	NA	NA	Yes	25	Not ambiguous	Not ambiguous	3849	Neg	FALSE	A	Mobile	FALSE	0	0	0	0	0	0	0	0	Neg	Neg	Neg	Neg	Neg
A1978	UM/BDD	No	Neg	NA	Neg	Neg	NA	Neg	Neg	Pos	Neg	1+	0	1+	0	Neg	Neg	0	0	0	0	NA	0	22/07/2015	25	NA	Yes	13	Not ambiguous	Not ambiguous	3851	Neg	FALSE	A	Mobile	FALSE	1	0	1	0	0	0	0	0	Pos	Neg	Pos	Neg	Neg
A2002	UM/BDD	No	Neg	NA	Neg	Neg	Neg	Neg	Neg	Neg	Neg	0	0	0	0	Pos	Pos	2+	1+	0	0	NA	0	22/07/2015	NA	NA	Yes	16	Not ambiguous	Not ambiguous	3853	Neg	FALSE	A	Mobile	FALSE	0	0	0	0	1	1	0	0	Neg	Neg	Neg	Neg	Pos
A1802	UM/BDD	No	Neg	NA	Neg	Neg	Neg	Neg	Neg	Pos	Pos	0	0	1+	2+	Neg	Neg	0	0	0	0	NA	0	21/07/2015	NA	NA	Yes	8	Not ambiguous	Not ambiguous	3855	Neg	FALSE	A	Mobile	FALSE	0	0	1	1	0	0	0	0	Neg	Neg	Pos	Pos	Neg
A1763	UM/BDD	No	Neg	NA	Neg	Neg	NA	Neg	Neg	Pos	Pos	1+	0	2+	3+	Neg	Neg	0	0	0	0	NA	0	21/07/2015	25	NA	Yes	15	Not ambiguous	Not ambiguous	3857	Neg	FALSE	A	Mobile	FALSE	1	0	1	1	0	0	0	0	Pos	Neg	Pos	Pos	Neg
A1924	UM/BDD	No	Neg	NA	Neg	Neg	Neg	Neg	Neg	Pos	Neg	1+	0	0	0	Neg	Neg	0	0	0	0	NA	0	22/07/2015	1	NA	Yes	22	Not ambiguous	Not ambiguous	3859	Neg	FALSE	A	Mobile	FALSE	1	0	0	0	0	0	0	0	Pos	Neg	Neg	Neg	Neg
A1732	UM/BDD	No	Neg	NA	Neg	Neg	NA	Neg	Neg	Neg	Neg	0	0	0	0	Neg	Neg	0	0	0	0	NA	0	21/07/2015	NA	NA	Yes	46	Not ambiguous	Not ambiguous	3861	Neg	FALSE	A	Mobile	FALSE	0	0	0	0	0	0	0	0	Neg	Neg	Neg	Neg	Neg
A1670	UM/BDD	No	Neg	NA	Neg	Neg	NA	Neg	Neg	Neg	Neg	0	0	0	0	Pos	Pos	0	0	2+	1+	NA	0	21/07/2015	NA	NA	Yes	35	Not ambiguous	Not ambiguous	3863	Neg	FALSE	A	Mobile	FALSE	0	0	0	0	0	0	1	1	Neg	Neg	Neg	Neg	Neg
A1955	UM/BDD	No	Neg	NA	Neg	Neg	NA	Neg	Neg	Neg	Neg	0	0	0	0	Pos	Pos	4+	3+	1+	1+	NA	0	22/07/2015	NA	NA	Yes	14	Not ambiguous	Not ambiguous	3865	Neg	FALSE	A	Mobile	FALSE	0	0	0	0	1	1	1	1	Neg	Neg	Neg	Neg	Pos
A1625	UM/BDD	No	Neg	NA	Neg	Neg	NA	Neg	Neg	Neg	Neg	0	0	0	0	Pos	Pos	0	0	2+	1+	NA	0	21/07/2015	NA	NA	Yes	50	Not ambiguous	Not ambiguous	3867	Neg	FALSE	A	Mobile	FALSE	0	0	0	0	0	0	1	1	Neg	Neg	Neg	Neg	Neg
A1776	UM/BDD	No	Neg	NA	Neg	Neg	NA	Neg	Neg	Neg	Neg	0	0	0	0	Pos	Pos	3+	2+	0	0	NA	0	21/07/2015	NA	NA	Yes	53	Not ambiguous	Not ambiguous	3869	Neg	FALSE	A	Mobile	FALSE	0	0	0	0	1	1	0	0	Neg	Neg	Neg	Neg	Pos
A4117	UM/BDD	No	Neg	NA	Neg	Neg	NA	Neg	Neg	Neg	Neg	0	0	0	0	Neg	Neg	0	0	0	0	NA	0	31/07/2015	NA	NA	Yes	47	Not ambiguous	Not ambiguous	3871	Neg	FALSE	A	Mobile	FALSE	0	0	0	0	0	0	0	0	Neg	Neg	Neg	Neg	Neg
A1641	UM/BDD	No	Neg	NA	Neg	Neg	NA	Neg	Neg	Pos	Pos	2+	2+	0	0	Neg	Neg	0	0	0	0	NA	0	21/07/2015	NA	NA	Yes	8	Not ambiguous	Not ambiguous	3873	Neg	FALSE	A	Mobile	FALSE	1	1	0	0	0	0	0	0	Pos	Pos	Neg	Neg	Neg
A1645	UM/BDD	No	Neg	NA	Neg	Neg	NA	Neg	Neg	Neg	Neg	0	0	0	0	Neg	Neg	0	0	0	0	NA	0	21/07/2015	NA	NA	Yes	48	Not ambiguous	Not ambiguous	3875	Neg	FALSE	A	Mobile	FALSE	0	0	0	0	0	0	0	0	Neg	Neg	Neg	Neg	Neg
A4111	UM/BDD	No	Neg	NA	Neg	Neg	NA	Neg	Neg	Neg	Neg	0	0	0	0	Neg	Neg	0	0	0	0	NA	0	31/07/2015	NA	NA	Yes	41	Not ambiguous	Not ambiguous	3877	Neg	FALSE	A	Mobile	FALSE	0	0	0	0	0	0	0	0	Neg	Neg	Neg	Neg	Neg
A1632	UM/BDD	No	Neg	NA	Neg	Neg	NA	Neg	Neg	Neg	Neg	0	0	0	0	Pos	Pos	0	0	2+	2+	NA	0	21/07/2015	NA	NA	Yes	23	Not ambiguous	Not ambiguous	3879	Neg	FALSE	A	Mobile	FALSE	0	0	0	0	0	0	1	1	Neg	Neg	Neg	Neg	Neg
A4185	UM/BDD	No	Neg	NA	Neg	Neg	NA	Neg	Neg	Neg	Neg	0	0	0	0	Pos	Pos	0	0	1+	1+	NA	0	31/07/2015	NA	NA	Yes	36	Not ambiguous	Not ambiguous	3881	Neg	FALSE	A	Mobile	FALSE	0	0	0	0	0	0	1	1	Neg	Neg	Neg	Neg	Neg
A1639	UM/BDD	No	Neg	NA	Neg	Neg	NA	Neg	Neg	Pos	Pos	2+	2+	0	0	Pos	Neg	1+	0	0	0	NA	0	21/07/2015	NA	NA	Yes	7	Not ambiguous	Not ambiguous	3883	Neg	FALSE	A	Mobile	FALSE	1	1	0	0	1	0	0	0	Pos	Pos	Neg	Neg	Pos
A3526	UM/BDD	No	Neg	NA	Neg	Neg	NA	Neg	Neg	Pos	Pos	1+	1+	1+	1+	Neg	Neg	0	0	0	0	NA	0	30/07/2015	1	NA	Yes	3	Not ambiguous	Not ambiguous	3885	Neg	FALSE	A	Mobile	FALSE	1	1	1	1	0	0	0	0	Pos	Pos	Pos	Pos	Neg
A4149	UM/BDD	No	Neg	NA	Neg	Neg	NA	Neg	Neg	Neg	Pos	0	0	0	1+	Pos	Pos	0	0	1+	1+	NA	0	31/07/2015	NA	NA	Yes	58	Not ambiguous	Not ambiguous	3887	Neg	FALSE	A	Mobile	FALSE	0	0	0	1	0	0	1	1	Neg	Neg	Neg	Pos	Neg
A3517	UM/BDD	No	Neg	NA	Neg	Neg	NA	Neg	Neg	Neg	Neg	0	0	0	0	Neg	Neg	0	0	0	0	NA	0	30/07/2015	NA	NA	Yes	31	Not ambiguous	Not ambiguous	3889	Neg	FALSE	A	Mobile	FALSE	0	0	0	0	0	0	0	0	Neg	Neg	Neg	Neg	Neg
A3534	UM/BDD	No	Neg	NA	Neg	Neg	NA	Neg	Neg	Neg	Neg	0	0	0	0	Neg	Neg	0	0	0	0	NA	0	30/07/2015	NA	NA	Yes	41	Not ambiguous	Not ambiguous	3891	Neg	FALSE	A	Mobile	FALSE	0	0	0	0	0	0	0	0	Neg	Neg	Neg	Neg	Neg
A3594	UM/BDD	No	Neg	NA	Neg	Neg	NA	Neg	Neg	Neg	Neg	0	0	0	0	Pos	Pos	0	0	2+	1+	NA	0	30/07/2015	NA	NA	Yes	30	Not ambiguous	Not ambiguous	3893	Neg	FALSE	A	Mobile	FALSE	0	0	0	0	0	0	1	1	Neg	Neg	Neg	Neg	Neg
A3577	UM/BDD	No	Neg	NA	Neg	Neg	NA	Pos	Pos	Pos	Pos	3+	2+	2+	2+	Neg	Neg	0	0	0	0	NA	0	30/07/2015	NA	NA	Yes	38	Not ambiguous	Not ambiguous	3895	Neg	FALSE	A	Mobile	FALSE	1	1	1	1	0	0	0	0	Pos	Pos	Pos	Pos	Neg
A3552	UM/BDD	No	Neg	NA	Neg	Neg	NA	Neg	Neg	Pos	Pos	1+	1+	1+	0	Neg	Neg	0	0	0	0	NA	0	30/07/2015	1	NA	Yes	9	Not ambiguous	Not ambiguous	3897	Neg	FALSE	A	Mobile	FALSE	1	1	1	0	0	0	0	0	Pos	Pos	Pos	Neg	Neg
A3532	UM/BDD	No	Neg	NA	Neg	Neg	Neg	Neg	Neg	Pos	Pos	1+	1+	1+	1+	Neg	Neg	0	0	0	0	NA	0	30/07/2015	1	NA	Yes	10	Not ambiguous	Not ambiguous	3899	Neg	FALSE	A	Mobile	FALSE	1	1	1	1	0	0	0	0	Pos	Pos	Pos	Pos	Neg
A1740	UM/BDD	No	Neg	NA	Neg	Neg	NA	Neg	Neg	Neg	Neg	0	0	0	0	Pos	Pos	2+	3+	0	0	NA	0	21/07/2015	NA	NA	Yes	28	Not ambiguous	Not ambiguous	3901	Neg	FALSE	A	Mobile	FALSE	0	0	0	0	1	1	0	0	Neg	Neg	Neg	Neg	Pos
A3555	UM/BDD	No	Neg	NA	Neg	Neg	NA	Neg	Neg	Pos	Pos	1+	1+	1+	0	Neg	Neg	0	0	0	0	NA	0	30/07/2015	1	NA	Yes	54	Not ambiguous	Not ambiguous	3903	Neg	FALSE	A	Mobile	FALSE	1	1	1	0	0	0	0	0	Pos	Pos	Pos	Neg	Neg
A1753	UM/BDD	No	Neg	NA	Neg	Neg	NA	Neg	Neg	Neg	Neg	0	0	0	0	Pos	Pos	2+	2+	0	0	NA	0	22/07/2015	NA	NA	Yes	33	Not ambiguous	Not ambiguous	3905	Neg	FALSE	A	Mobile	FALSE	0	0	0	0	1	1	0	0	Neg	Neg	Neg	Neg	Pos
A3511	UM/BDD	No	Neg	NA	Neg	Neg	NA	Pos	Pos	Neg	Neg	0	0	0	0	Neg	Neg	0	0	0	0	NA	0	30/07/2015	NA	NA	Yes	18	Not ambiguous	Not ambiguous	3907	Neg	FALSE	A	Mobile	FALSE	0	0	0	0	0	0	0	0	Neg	Neg	Neg	Neg	Neg
A3503	UM/BDD	No	Neg	NA	Neg	Neg	NA	Pos	Pos	Neg	Neg	0	0	0	0	Pos	Pos	0	0	1+	1+	NA	0	30/07/2015	NA	NA	Yes	10	Not ambiguous	Not ambiguous	3909	Neg	FALSE	A	Mobile	FALSE	0	0	0	0	0	0	1	1	Neg	Neg	Neg	Neg	Neg
A3338	UM/BDD	No	Neg	NA	Neg	Neg	NA	Neg	Neg	Pos	Pos	1+	1+	1+	0	Neg	Neg	0	0	0	0	NA	0	29/07/2015	1	NA	Yes	12	Not ambiguous	Not ambiguous	3911	Neg	FALSE	A	Mobile	FALSE	1	1	1	0	0	0	0	0	Pos	Pos	Pos	Neg	Neg
A2967	UM/BDD	No	Neg	NA	Neg	Neg	NA	Neg	Neg	Pos	Pos	2+	2+	2+	2+	Neg	Neg	0	0	0	0	NA	0	29/07/2015	NA	NA	Yes	7	Not ambiguous	Not ambiguous	3914	Neg	FALSE	A	Mobile	FALSE	1	1	1	1	0	0	0	0	Pos	Pos	Pos	Pos	Neg
A3199	UM/BDD	No	Neg	NA	Neg	Neg	NA	Neg	Neg	Neg	Neg	0	0	0	0	Neg	Neg	0	0	0	0	NA	0	29/07/2015	NA	NA	Yes	69	Not ambiguous	Not ambiguous	3916	Neg	FALSE	A	Mobile	FALSE	0	0	0	0	0	0	0	0	Neg	Neg	Neg	Neg	Neg
A2981	UM/BDD	No	Neg	NA	Neg	Neg	NA	Neg	Neg	Pos	Neg	1+	0	1+	0	Pos	Pos	1+	1+	0	0	NA	0	29/07/2015	1	NA	Yes	7	Not ambiguous	Not ambiguous	3918	Neg	FALSE	A	Mobile	FALSE	1	0	1	0	1	1	0	0	Pos	Neg	Pos	Neg	Pos
A2845	UM/BDD	No	Neg	NA	Neg	Neg	NA	Neg	Neg	Pos	Pos	1+	1+	1+	1+	Neg	Neg	0	0	0	0	NA	0	28/07/2015	25	NA	Yes	41	Not ambiguous	Not ambiguous	3920	Neg	FALSE	A	Mobile	FALSE	1	1	1	1	0	0	0	0	Pos	Pos	Pos	Pos	Neg
A3218	UM/BDD	No	Neg	NA	Neg	Neg	NA	Pos	Pos	Neg	Neg	0	0	0	0	Neg	Neg	0	0	0	0	NA	0	29/07/2015	NA	NA	Yes	21	Not ambiguous	Not ambiguous	3922	Neg	FALSE	A	Mobile	FALSE	0	0	0	0	0	0	0	0	Neg	Neg	Neg	Neg	Neg
A3209	UM/BDD	No	Neg	NA	Neg	Neg	NA	Neg	Neg	Pos	Pos	1+	2+	2+	1+	Neg	Neg	0	0	0	0	NA	0	29/07/2015	1	NA	Yes	3	Not ambiguous	Not ambiguous	3924	Neg	FALSE	A	Mobile	FALSE	1	1	1	1	0	0	0	0	Pos	Pos	Pos	Pos	Neg
A1758	UM/BDD	No	Neg	NA	Neg	Neg	Neg	Pos	Pos	Neg	Neg	0	0	0	0	Neg	Neg	0	0	0	0	NA	0	22/07/2015	NA	NA	Yes	47	Not ambiguous	Not ambiguous	3926	Neg	FALSE	A	Mobile	FALSE	0	0	0	0	0	0	0	0	Neg	Neg	Neg	Neg	Neg
A1810	UM/BDD	No	Neg	NA	Neg	Neg	NA	Neg	Neg	Pos	Pos	3+	2+	2+	3+	Neg	Neg	0	0	0	0	NA	0	21/07/2015	NA	NA	Yes	10	Not ambiguous	Not ambiguous	3930	Neg	FALSE	A	Mobile	FALSE	1	1	1	1	0	0	0	0	Pos	Pos	Pos	Pos	Neg
A3221	UM/BDD	No	Neg	NA	Neg	Neg	Neg	Neg	Neg	Neg	Neg	0	0	0	0	Neg	Neg	0	0	0	0	NA	0	29/07/2015	NA	NA	Yes	18	Not ambiguous	Not ambiguous	3932	Neg	FALSE	A	Mobile	FALSE	0	0	0	0	0	0	0	0	Neg	Neg	Neg	Neg	Neg
A2853	UM/BDD	No	Neg	NA	Neg	Neg	NA	Neg	Neg	Pos	Pos	0	0	2+	2+	Neg	Neg	0	0	0	0	NA	0	28/07/2015	NA	NA	Yes	13	Not ambiguous	Not ambiguous	3934	Neg	FALSE	A	Mobile	FALSE	0	0	1	1	0	0	0	0	Neg	Neg	Pos	Pos	Neg
A3300	UM/BDD	No	Neg	NA	Neg	Neg	NA	Neg	Neg	Neg	Neg	0	0	0	0	Pos	Pos	4+	3+	0	0	NA	0	29/07/2015	NA	NA	Yes	28	Not ambiguous	Not ambiguous	3936	Neg	FALSE	A	Mobile	FALSE	0	0	0	0	1	1	0	0	Neg	Neg	Neg	Neg	Pos
A2821	UM/BDD	No	Neg	NA	Neg	Neg	Neg	Pos	Pos	Neg	Neg	0	0	0	0	Neg	Neg	0	0	0	0	NA	0	28/07/2015	NA	NA	Yes	9	Not ambiguous	Not ambiguous	3938	Neg	FALSE	A	Mobile	FALSE	0	0	0	0	0	0	0	0	Neg	Neg	Neg	Neg	Neg
A3313	UM/BDD	No	Neg	NA	Neg	Neg	NA	Neg	Neg	Neg	Neg	0	0	0	0	Pos	Pos	0	2+	3+	0	NA	0	29/07/2015	NA	NA	Yes	9	Not ambiguous	Not ambiguous	3940	Neg	FALSE	A	Mobile	FALSE	0	0	0	0	0	1	1	0	Neg	Neg	Neg	Neg	Neg
A3285	UM/BDD	No	Neg	NA	Neg	Neg	NA	Neg	Neg	Pos	Pos	1+	1+	2+	2+	Neg	Neg	0	0	0	0	NA	0	29/07/2015	25	NA	Yes	12	Not ambiguous	Not ambiguous	3942	Neg	FALSE	A	Mobile	FALSE	1	1	1	1	0	0	0	0	Pos	Pos	Pos	Pos	Neg
A3331	UM/BDD	No	Neg	NA	Neg	Neg	NA	Neg	Neg	Pos	Pos	1+	1+	1+	1+	Neg	Neg	0	0	0	0	NA	0	29/07/2015	25	NA	Yes	3	Not ambiguous	Not ambiguous	3946	Neg	FALSE	A	Mobile	FALSE	1	1	1	1	0	0	0	0	Pos	Pos	Pos	Pos	Neg
A1925	UM/BDD	No	Neg	NA	Neg	Neg	NA	Neg	Neg	Neg	Neg	0	0	0	0	Pos	Pos	0	0	3+	2+	NA	0	22/07/2015	NA	NA	Yes	54	Not ambiguous	Not ambiguous	3948	Neg	FALSE	A	Mobile	FALSE	0	0	0	0	0	0	1	1	Neg	Neg	Neg	Neg	Neg
A2822	UM/BDD	No	Neg	NA	Neg	Neg	NA	Pos	Pos	Neg	Neg	0	0	0	0	Neg	Neg	0	0	0	0	NA	0	29/07/2015	NA	NA	Yes	35	Not ambiguous	Not ambiguous	3950	Neg	FALSE	A	Mobile	FALSE	0	0	0	0	0	0	0	0	Neg	Neg	Neg	Neg	Neg
A1971	UM/BDD	No	Neg	NA	Neg	Neg	NA	Neg	Neg	Pos	Pos	0	0	1+	1+	Pos	Pos	1+	1+	0	0	NA	0	22/07/2015	NA	NA	Yes	11	Not ambiguous	Not ambiguous	3952	Neg	FALSE	A	Mobile	FALSE	0	0	1	1	1	1	0	0	Neg	Neg	Pos	Pos	Pos
A2947	UM/BDD	No	Neg	NA	Neg	Neg	NA	Neg	Neg	Pos	Pos	1+	1+	1+	0	Neg	Neg	0	0	0	0	NA	0	28/07/2015	25	NA	Yes	11	Not ambiguous	Not ambiguous	3954	Neg	FALSE	A	Mobile	FALSE	1	1	1	0	0	0	0	0	Pos	Pos	Pos	Neg	Neg
A1742	UM/BDD	No	Neg	NA	Neg	Neg	NA	Pos	Pos	Neg	Neg	0	0	0	0	Pos	Pos	0	0	4+	3+	NA	0	21/07/2015	NA	NA	Yes	57	Not ambiguous	Not ambiguous	3956	Neg	FALSE	A	Mobile	FALSE	0	0	0	0	0	0	1	1	Neg	Neg	Neg	Neg	Neg
A2919	UM/BDD	No	Neg	NA	Neg	Neg	NA	Neg	Neg	Neg	Neg	0	0	0	0	Neg	Neg	0	0	0	0	NA	0	28/07/2015	NA	NA	Yes	21	Not ambiguous	Not ambiguous	3958	Neg	FALSE	A	Mobile	FALSE	0	0	0	0	0	0	0	0	Neg	Neg	Neg	Neg	Neg
A1719	UM/BDD	No	Neg	NA	Neg	Neg	NA	Neg	Neg	Neg	Neg	0	0	0	0	Pos	Pos	0	0	2+	3+	NA	0	21/07/2015	NA	NA	Yes	59	Not ambiguous	Not ambiguous	3960	Neg	FALSE	A	Mobile	FALSE	0	0	0	0	0	0	1	1	Neg	Neg	Neg	Neg	Neg
A2936	UM/BDD	No	Neg	NA	Neg	Neg	NA	Neg	Neg	Neg	Neg	0	0	0	0	Pos	Pos	2+	1+	0	0	NA	0	28/07/2015	NA	NA	Yes	32	Not ambiguous	Not ambiguous	3962	Neg	FALSE	A	Mobile	FALSE	0	0	0	0	1	1	0	0	Neg	Neg	Neg	Neg	Pos
A1664	UM/BDD	No	Neg	NA	Neg	Neg	NA	Neg	Neg	Neg	Neg	0	0	0	0	Neg	Neg	0	0	0	0	NA	0	21/07/2015	NA	NA	Yes	38	Not ambiguous	Not ambiguous	3964	Neg	FALSE	A	Mobile	FALSE	0	0	0	0	0	0	0	0	Neg	Neg	Neg	Neg	Neg
A2854	UM/BDD	No	Neg	NA	Neg	Neg	Neg	Neg	Neg	Pos	Pos	1+	1+	1+	1+	Neg	Neg	0	0	0	0	NA	0	28/07/2015	25	NA	Yes	3	Not ambiguous	Not ambiguous	3966	Neg	FALSE	A	Mobile	FALSE	1	1	1	1	0	0	0	0	Pos	Pos	Pos	Pos	Neg
A2881	UM/BDD	No	Neg	NA	Neg	Neg	NA	Neg	Neg	Neg	Neg	0	0	0	0	Pos	Pos	0	0	2+	2+	NA	0	28/07/2015	NA	NA	Yes	30	Not ambiguous	Not ambiguous	3968	Neg	FALSE	A	Mobile	FALSE	0	0	0	0	0	0	1	1	Neg	Neg	Neg	Neg	Neg
A1682	UM/BDD	No	Neg	NA	Neg	Neg	NA	Neg	Neg	Pos	Pos	0	0	3+	1+	Neg	Neg	0	0	0	0	NA	0	21/07/2015	NA	NA	Yes	13	Not ambiguous	Not ambiguous	3970	Neg	FALSE	A	Mobile	FALSE	0	0	1	1	0	0	0	0	Neg	Neg	Pos	Pos	Neg
A2949	UM/BDD	No	Neg	NA	Neg	Neg	NA	Neg	Neg	Pos	Pos	2+	1+	2+	0	Neg	Neg	0	0	0	0	NA	0	29/07/2015	NA	NA	Yes	13	Not ambiguous	Not ambiguous	3972	Neg	FALSE	A	Mobile	FALSE	1	1	1	0	0	0	0	0	Pos	Pos	Pos	Neg	Neg
A2843	UM/BDD	No	Neg	NA	Neg	Neg	NA	Neg	Neg	Pos	Pos	1+	2+	1+	1+	Neg	Neg	0	0	0	0	NA	0	28/07/2015	25	NA	Yes	5	Not ambiguous	Not ambiguous	3974	Neg	FALSE	A	Mobile	FALSE	1	1	1	1	0	0	0	0	Pos	Pos	Pos	Pos	Neg
A1720	UM/BDD	No	Neg	NA	Neg	Neg	Neg	Neg	Neg	Neg	Neg	0	0	0	0	Pos	Pos	0	0	4+	3+	NA	0	21/07/2015	NA	NA	Yes	6	Not ambiguous	Not ambiguous	3976	Neg	FALSE	A	Mobile	FALSE	0	0	0	0	0	0	1	1	Neg	Neg	Neg	Neg	Neg
A2955	UM/BDD	No	Neg	NA	Neg	Neg	Neg	Neg	Neg	Pos	Pos	1+	1+	1+	0	Neg	Neg	0	0	0	0	NA	0	28/07/2015	25	NA	Yes	22	Not ambiguous	Not ambiguous	3978	Neg	FALSE	A	Mobile	FALSE	1	1	1	0	0	0	0	0	Pos	Pos	Pos	Neg	Neg
A4145	UM/BDD	No	Neg	NA	Neg	Neg	Neg	Pos	Pos	Neg	Neg	0	0	0	0	Pos	Pos	0	0	2+	2+	NA	0	31/07/2015	NA	NA	Yes	33	Not ambiguous	Not ambiguous	3980	Neg	FALSE	A	Mobile	FALSE	0	0	0	0	0	0	1	1	Neg	Neg	Neg	Neg	Neg
P613	HGR/MASIMANIMBA	No	Neg	NA	Neg	Neg	NA	Neg	Neg	Neg	Neg	0	0	0	0	Pos	Pos	0	0	3+	3+	NA	0	31/08/2015	NA	NA	Yes	6	Not ambiguous	Not ambiguous	4018	Neg	FALSE	P	Fixed	FALSE	0	0	0	0	0	0	1	1	Neg	Neg	Neg	Neg	Neg
P651	HGR/MASIMANIMBA	No	Neg	NA	Neg	Neg	NA	Neg	Neg	Neg	Neg	0	0	0	0	Pos	Pos	4+	4+	0	0	NA	0	03/09/2015	NA	NA	Yes	12	Not ambiguous	Not ambiguous	4022	Neg	FALSE	P	Fixed	FALSE	0	0	0	0	1	1	0	0	Neg	Neg	Neg	Neg	Pos
P661	HGR/MASI	No	Neg	NA	Neg	Neg	Neg	Pos	Pos	Neg	Neg	0	0	0	0	Neg	Neg	0	0	0	0	NA	0	03/09/2015	NA	NA	Yes	28	Not ambiguous	Not ambiguous	4026	Neg	FALSE	P	Fixed	FALSE	0	0	0	0	0	0	0	0	Neg	Neg	Neg	Neg	Neg
P700	HGR/MASI	No	Neg	NA	Neg	Neg	NA	Neg	Neg	Neg	Neg	0	0	0	0	Pos	Pos	0	0	2+	2+	NA	0	08/09/2015	NA	NA	Yes	50	Not ambiguous	Not ambiguous	4034	Neg	FALSE	P	Fixed	FALSE	0	0	0	0	0	0	1	1	Neg	Neg	Neg	Neg	Neg
P709	HGR/MASIMANIMBA	No	Neg	NA	Neg	Neg	Neg	Pos	Pos	Neg	Neg	0	0	0	0	Neg	Neg	0	0	0	0	NA	0	09/09/2015	NA	NA	Yes	5	Not ambiguous	Not ambiguous	4040	Neg	FALSE	P	Fixed	FALSE	0	0	0	0	0	0	0	0	Neg	Neg	Neg	Neg	Neg
P716	HGR/MASIMANIMBA	No	Neg	NA	Neg	Neg	NA	Pos	Pos	Neg	Neg	0	0	0	0	Neg	Neg	0	0	0	0	NA	0	10/09/2015	NA	NA	Yes	11	Ambiguous	Ambiguous	4044	Neg	FALSE	P	Fixed	FALSE	0	0	0	0	0	0	0	0	Neg	Neg	Neg	Neg	Neg
A1611	UM/BDD	No	Neg	NA	Neg	Neg	NA	Pos	Pos	Neg	Neg	0	0	0	0	Pos	Pos	2+	3+	0	0	NA	0	21/07/2015	NA	NA	Yes	48	Not ambiguous	Not ambiguous	4046	Neg	FALSE	A	Mobile	FALSE	0	0	0	0	1	1	0	0	Neg	Neg	Neg	Neg	Pos
A4130	UM/BDD	No	Neg	NA	Neg	Neg	NA	Neg	Neg	Neg	Neg	0	0	0	0	Pos	Pos	1+	1+	0	0	NA	0	31/07/2015	NA	NA	Yes	48	Not ambiguous	Not ambiguous	4054	Neg	FALSE	A	Mobile	FALSE	0	0	0	0	1	1	0	0	Neg	Neg	Neg	Neg	Pos
A4124	UM/BDD	No	Neg	NA	Neg	Neg	NA	Neg	Neg	Neg	Neg	0	0	0	0	Neg	Neg	0	0	0	0	NA	0	31/07/2015	NA	NA	Yes	15	Not ambiguous	Not ambiguous	4058	Neg	FALSE	A	Mobile	FALSE	0	0	0	0	0	0	0	0	Neg	Neg	Neg	Neg	Neg
A4121	UM/BDD	No	Neg	NA	Neg	Neg	NA	Neg	Neg	Neg	Neg	0	0	0	0	Neg	Neg	0	0	0	0	NA	0	31/07/2015	NA	NA	Yes	40	Not ambiguous	Not ambiguous	4064	Neg	FALSE	A	Mobile	FALSE	0	0	0	0	0	0	0	0	Neg	Neg	Neg	Neg	Neg
C0060	UM/MUSHIE	No	Neg	NA	Neg	Neg	NA	Neg	Neg	Neg	Neg	0	0	0	0	Pos	Pos	0	0	2+	2+	NA	0	31/07/2015	NA	NA	Yes	17	Not ambiguous	Not ambiguous	4066	Neg	FALSE	C	Mobile	FALSE	0	0	0	0	0	0	1	1	Neg	Neg	Neg	Neg	Neg
C0059	UM/MUSHIE	No	Neg	NA	Neg	Neg	NA	Neg	Neg	Neg	Neg	0	0	0	0	Pos	Pos	0	0	2+	1+	NA	0	29/07/2015	NA	NA	Yes	16	Not ambiguous	Not ambiguous	4068	Neg	FALSE	C	Mobile	FALSE	0	0	0	0	0	0	1	1	Neg	Neg	Neg	Neg	Neg
C0058	UM/MUSHIE	No	Neg	NA	Neg	Neg	NA	Neg	Neg	Neg	Neg	0	0	0	0	Pos	Pos	0	0	3+	3+	NA	0	29/07/2015	NA	NA	Yes	42	Not ambiguous	Not ambiguous	4070	Neg	FALSE	C	Mobile	FALSE	0	0	0	0	0	0	1	1	Neg	Neg	Neg	Neg	Neg
C0057	UM/MUSHIE	No	Neg	NA	Neg	Neg	NA	Neg	Neg	Neg	Neg	0	0	0	0	Pos	Pos	1+	3+	0	0	NA	0	29/07/2015	NA	NA	Yes	13	Not ambiguous	Not ambiguous	4072	Neg	FALSE	C	Mobile	FALSE	0	0	0	0	1	1	0	0	Neg	Neg	Neg	Neg	Pos
C0053	UM/MUSHIE	No	Neg	NA	Neg	Neg	NA	Neg	Neg	Pos	Pos	2+	1+	2+	2+	Neg	Neg	0	0	0	0	NA	0	26/07/2015	6	NA	Yes	30	Not ambiguous	Not ambiguous	4074	Neg	FALSE	C	Mobile	FALSE	1	1	1	1	0	0	0	0	Pos	Pos	Pos	Pos	Neg
C0049	UM/MUSHIE	No	Neg	NA	Neg	Neg	NA	Neg	Neg	Neg	Neg	0	0	0	0	Pos	Pos	2+	2+	0	0	NA	0	24/07/2015	NA	NA	Yes	39	Not ambiguous	Not ambiguous	4076	Neg	FALSE	C	Mobile	FALSE	0	0	0	0	1	1	0	0	Neg	Neg	Neg	Neg	Pos
P718	HGR/MASIMANIMBA	No	Neg	NA	Neg	Neg	NA	Pos	Pos	Neg	Neg	0	0	0	0	Neg	Neg	0	0	0	0	NA	0	10/09/2015	NA	NA	Yes	30	Not ambiguous	Not ambiguous	4082	Neg	FALSE	P	Fixed	FALSE	0	0	0	0	0	0	0	0	Neg	Neg	Neg	Neg	Neg
P630	HGR/MASI	No	Neg	Pos	Pos	Pos	NA	Pos	Pos	Pos	Pos	2+	1+	1+	1+	Pos	Pos	4+	4+	3+	3+	NA	0	31/08/2015	NA	745	Yes	23	Not ambiguous	Not ambiguous	4084	Pos	TRUE	P	Fixed	FALSE	1	1	1	1	1	1	1	1	Pos	Pos	Pos	Pos	Pos
P625	HGR/MASIMANIMBA	No	Neg	NA	Neg	Neg	NA	Pos	Pos	Neg	Neg	0	0	0	0	Pos	Pos	1+	1+	0	0	NA	0	31/08/2015	NA	NA	Yes	20	Ambiguous	Ambiguous	4088	Neg	FALSE	P	Fixed	FALSE	0	0	0	0	1	1	0	0	Neg	Neg	Neg	Neg	Pos
C0041	UM/MUSHIE	No	Neg	NA	Neg	Neg	NA	Neg	Neg	Pos	Pos	1+	1+	1+	1+	Neg	Neg	0	0	0	0	NA	0	23/07/2015	8	NA	Yes	3	Not ambiguous	Not ambiguous	4090	Neg	FALSE	C	Mobile	FALSE	1	1	1	1	0	0	0	0	Pos	Pos	Pos	Pos	Neg
C0038	UM/MUSHIE	No	Neg	NA	Neg	Neg	NA	Neg	Neg	Pos	Pos	1+	1+	1+	1+	Neg	Neg	0	0	0	0	NA	0	22/07/2015	8	NA	Yes	17	Not ambiguous	Not ambiguous	4094	Neg	FALSE	C	Mobile	FALSE	1	1	1	1	0	0	0	0	Pos	Pos	Pos	Pos	Neg
C0032	UM/MUSHIE	No	Neg	NA	Neg	Neg	NA	Neg	Neg	Pos	Pos	1+	1+	1+	1+	Neg	Neg	0	0	0	0	NA	0	22/07/2015	48	NA	Yes	8	Not ambiguous	Not ambiguous	4096	Neg	FALSE	C	Mobile	FALSE	1	1	1	1	0	0	0	0	Pos	Pos	Pos	Pos	Neg
P646	HGR/MASI	No	Neg	NA	Neg	Neg	NA	Neg	Neg	Neg	Neg	0	0	0	0	Pos	Pos	0	0	2+	1+	NA	0	02/09/2015	NA	NA	Yes	27	Not ambiguous	Not ambiguous	4098	Neg	FALSE	P	Fixed	FALSE	0	0	0	0	0	0	1	1	Neg	Neg	Neg	Neg	Neg
C0031	UM/MUSHIE	No	Neg	NA	Neg	Neg	NA	Neg	Neg	Pos	Pos	1+	1+	0	0	Neg	Neg	0	0	0	0	NA	0	22/07/2015	32	NA	Yes	8	Not ambiguous	Not ambiguous	4100	Neg	FALSE	C	Mobile	FALSE	1	1	0	0	0	0	0	0	Pos	Pos	Neg	Neg	Neg
P662	HGR/MASI	No	Neg	NA	Neg	Neg	NA	Pos	Pos	Pos	Pos	1+	1+	2+	2+	Pos	Pos	1+	1+	0	0	NA	0	03/09/2015	1	NA	Yes	29	Not ambiguous	Not ambiguous	4102	Neg	FALSE	P	Fixed	FALSE	1	1	1	1	1	1	0	0	Pos	Pos	Pos	Pos	Pos
C0063	UM/MUSHIE	No	Neg	NA	Neg	Neg	NA	Neg	Neg	Pos	Pos	1+	1+	1+	1+	Neg	Neg	0	0	0	0	NA	0	30/07/2015	10	NA	Yes	9	Not ambiguous	Not ambiguous	4104	Neg	FALSE	C	Mobile	FALSE	1	1	1	1	0	0	0	0	Pos	Pos	Pos	Pos	Neg
P656	HGR/MASI	No	Neg	NA	Neg	Neg	Neg	Pos	Pos	Neg	Neg	0	0	0	0	Pos	Pos	1+	1+	1+	1+	NA	0	04/09/2015	NA	NA	Yes	22	Not ambiguous	Not ambiguous	4106	Neg	FALSE	P	Fixed	FALSE	0	0	0	0	1	1	1	1	Neg	Neg	Neg	Neg	Pos
P671	HGR/MASI	No	Neg	NA	Neg	Neg	NA	Pos	Pos	Neg	Neg	0	0	0	0	Pos	Pos	1+	1+	0	0	NA	0	04/09/2015	NA	NA	Yes	32	Ambiguous	Ambiguous	4108	Neg	FALSE	P	Fixed	FALSE	0	0	0	0	1	1	0	0	Neg	Neg	Neg	Neg	Pos
P694	HGR/MASI	No	Neg	NA	Neg	Neg	Neg	Neg	Neg	Neg	Neg	0	0	0	0	Pos	Pos	3+	1+	1+	4+	NA	0	08/09/2015	NA	NA	Yes	2	Not ambiguous	Not ambiguous	4110	Neg	FALSE	P	Fixed	FALSE	0	0	0	0	1	1	1	1	Neg	Neg	Neg	Neg	Pos
P715	HGR/MASIMANIMBA	No	Neg	NA	Neg	Neg	NA	Neg	Neg	Pos	Pos	1+	1+	0	0	Pos	Pos	0	0	2+	2+	NA	0	10/09/2015	1	NA	Yes	46	Not ambiguous	Not ambiguous	4112	Neg	FALSE	P	Fixed	FALSE	1	1	0	0	0	0	1	1	Pos	Pos	Neg	Neg	Neg
P720	HGR/MASIMANIMBA	No	Neg	NA	Neg	Neg	NA	Neg	Neg	Neg	Neg	0	0	0	0	Pos	Pos	1+	1+	2+	2+	NA	0	10/09/2015	NA	NA	Yes	30	Not ambiguous	Not ambiguous	4114	Neg	FALSE	P	Fixed	FALSE	0	0	0	0	1	1	1	1	Neg	Neg	Neg	Neg	Pos
A1699	UM/BDD	No	Neg	NA	Neg	Neg	NA	Neg	Neg	Neg	Neg	0	0	0	0	Pos	Pos	0	0	2+	2+	NA	0	21/07/2015	NA	NA	Yes	80	Not ambiguous	Not ambiguous	4203	Neg	FALSE	A	Mobile	FALSE	0	0	0	0	0	0	1	1	Neg	Neg	Neg	Neg	Neg
A1723	UM/BDD	No	Neg	NA	Neg	Neg	NA	Neg	Neg	Pos	Pos	1+	1+	0	0	Pos	Pos	0	0	3+	2+	NA	0	21/07/2015	25	NA	Yes	39	Not ambiguous	Not ambiguous	4207	Neg	FALSE	A	Mobile	FALSE	1	1	0	0	0	0	1	1	Pos	Pos	Neg	Neg	Neg
P663	HGR/MASIMANIMBA	No	Neg	NA	Neg	Neg	NA	Pos	Pos	Pos	Pos	3+	1+	2+	1+	Neg	Neg	0	0	0	0	NA	0	03/09/2015	NA	NA	Yes	17	Not ambiguous	Not ambiguous	4222	Neg	FALSE	P	Fixed	FALSE	1	1	1	1	0	0	0	0	Pos	Pos	Pos	Pos	Neg
Q590	HGR YASA-BONGA	No	Neg	NA	Neg	Neg	Neg	Neg	Neg	Pos	Pos	0	0	3+	3+	Pos	Pos	0	0	4+	4+	NA	0	23/07/2015	NA	NA	Yes	13	Not ambiguous	Not ambiguous	4288	Neg	FALSE	Q	Fixed	FALSE	0	0	1	1	0	0	1	1	Neg	Neg	Pos	Pos	Neg
L024	HS NKARA	No	Neg	NA	Neg	Neg	NA	Pos	Pos	Neg	Neg	0	0	0	0	Pos	Pos	1+	1+	1+	1+	NA	0	26/05/2015	NA	NA	Yes	41	Not ambiguous	Not ambiguous	4290	Neg	FALSE	L	Fixed	FALSE	0	0	0	0	1	1	1	1	Neg	Neg	Neg	Neg	Pos
L046	HS NKARA	No	Neg	NA	Neg	Neg	NA	Neg	Neg	Pos	Pos	1+	1+	0	0	Pos	Neg	1+	0	0	0	NA	0	28/05/2015	1	NA	Yes	29	Not ambiguous	Not ambiguous	4292	Neg	FALSE	L	Fixed	FALSE	1	1	0	0	1	0	0	0	Pos	Pos	Neg	Neg	Pos
L064	HS NKARA	No	Neg	NA	Neg	Neg	NA	Neg	Neg	Neg	Neg	0	0	0	0	Pos	Pos	0	0	2+	2+	NA	0	30/05/2015	NA	NA	Yes	19	Not ambiguous	Not ambiguous	4294	Neg	FALSE	L	Fixed	FALSE	0	0	0	0	0	0	1	1	Neg	Neg	Neg	Neg	Neg
L079	HS NKARA	No	Neg	NA	Neg	Neg	NA	Pos	Pos	Neg	Neg	0	0	0	0	Pos	Pos	1+	1+	1+	1+	NA	0	01/06/2015	NA	NA	Yes	6	Not ambiguous	Not ambiguous	4296	Neg	FALSE	L	Fixed	FALSE	0	0	0	0	1	1	1	1	Neg	Neg	Neg	Neg	Pos
L120	HS NKARA	No	Neg	NA	Neg	Neg	NA	Pos	Pos	Pos	Pos	1+	1+	0	0	Neg	Neg	0	0	0	0	NA	0	08/06/2015	4	NA	Yes	16	Not ambiguous	Not ambiguous	4298	Neg	FALSE	L	Fixed	FALSE	1	1	0	0	0	0	0	0	Pos	Pos	Neg	Neg	Neg
L172	HS NKARA	No	Neg	NA	Neg	Neg	NA	Neg	Neg	Neg	Neg	0	0	0	0	Pos	Pos	0	0	1+	1+	NA	0	14/06/2015	NA	NA	Yes	40	Not ambiguous	Not ambiguous	4300	Neg	FALSE	L	Fixed	FALSE	0	0	0	0	0	0	1	1	Neg	Neg	Neg	Neg	Neg
L216	HS NKARA	No	Neg	NA	Neg	Neg	NA	Neg	Neg	Pos	Pos	1+	1+	0	0	Neg	Neg	0	0	0	0	NA	0	20/06/2015	2	NA	Yes	23	Not ambiguous	Not ambiguous	4302	Neg	FALSE	L	Fixed	FALSE	1	1	0	0	0	0	0	0	Pos	Pos	Neg	Neg	Neg
L279	HS NKARA	No	Neg	NA	Neg	Neg	NA	Neg	Neg	Pos	Pos	1+	1+	0	0	Pos	Pos	0	0	2+	2+	NA	0	29/06/2015	1	NA	Yes	48	Not ambiguous	Not ambiguous	4304	Neg	FALSE	L	Fixed	FALSE	1	1	0	0	0	0	1	1	Pos	Pos	Neg	Neg	Neg
L347	CDTC NKARA	No	Neg	NA	Neg	Neg	NA	Neg	Neg	Pos	Pos	1+	1+	1+	1+	Pos	Pos	1+	1+	0	0	NA	0	15/07/2015	5	NA	Yes	14	Not ambiguous	Not ambiguous	4306	Neg	FALSE	L	Fixed	FALSE	1	1	1	1	1	1	0	0	Pos	Pos	Pos	Pos	Pos
L365	HS NKARA	No	Neg	NA	Neg	Neg	NA	Pos	Pos	Pos	Pos	1+	2+	0	0	Pos	Pos	1+	1+	1+	1+	NA	0	19/07/2015	4	NA	Yes	51	Not ambiguous	Not ambiguous	4308	Neg	FALSE	L	Fixed	FALSE	1	1	0	0	1	1	1	1	Pos	Pos	Neg	Neg	Pos
L402	HS NKARA	No	Neg	NA	Neg	Neg	NA	Pos	Pos	Pos	Pos	2+	2+	1+	1+	Pos	Pos	0	0	3+	3+	NA	0	27/07/2015	NA	NA	Yes	65	Not ambiguous	Not ambiguous	4310	Neg	FALSE	L	Fixed	FALSE	1	1	1	1	0	0	1	1	Pos	Pos	Pos	Pos	Neg
L409	HS NKARA	No	Neg	NA	Neg	Neg	NA	Pos	Pos	Neg	Neg	0	0	0	0	Neg	Neg	0	0	0	0	NA	0	28/07/2015	NA	NA	Yes	40	Not ambiguous	Not ambiguous	4312	Neg	FALSE	L	Fixed	FALSE	0	0	0	0	0	0	0	0	Neg	Neg	Neg	Neg	Neg
L410	HS NKARA	No	Neg	NA	Neg	Neg	NA	Pos	Pos	Pos	Pos	1+	1+	0	0	Neg	Neg	0	0	0	0	NA	0	28/07/2015	5	NA	Yes	11	Not ambiguous	Not ambiguous	4314	Neg	FALSE	L	Fixed	FALSE	1	1	0	0	0	0	0	0	Pos	Pos	Neg	Neg	Neg
L439	HS NKARA	No	Neg	NA	Neg	Neg	NA	Neg	Neg	Pos	Pos	2+	2+	1+	1+	Neg	Neg	0	0	0	0	NA	0	03/08/2015	NA	NA	Yes	28	Not ambiguous	Not ambiguous	4316	Neg	FALSE	L	Fixed	FALSE	1	1	1	1	0	0	0	0	Pos	Pos	Pos	Pos	Neg
L424	HS NKARA	No	Neg	NA	Neg	Neg	NA	Neg	Neg	Pos	Pos	2+	2+	0	0	Neg	Neg	0	0	0	0	NA	0	01/09/2015	NA	NA	Yes	11	Not ambiguous	Not ambiguous	4318	Neg	FALSE	L	Fixed	FALSE	1	1	0	0	0	0	0	0	Pos	Pos	Neg	Neg	Neg
Q642	HGR YASA-BONGA	No	Neg	NA	Neg	Neg	NA	Pos	Pos	Neg	Neg	0	0	0	0	Pos	Pos	1+	1+	0	0	NA	0	28/07/2015	NA	NA	Yes	7	Not ambiguous	Not ambiguous	4321	Neg	FALSE	Q	Fixed	FALSE	0	0	0	0	1	1	0	0	Neg	Neg	Neg	Neg	Pos
Q670	HGR YASA-BONGA	No	Neg	NA	Neg	Neg	Neg	Neg	Neg	Neg	Neg	0	0	0	0	Pos	Pos	1+	1+	0	0	NA	0	29/07/2015	NA	NA	Yes	48	Not ambiguous	Not ambiguous	4323	Neg	FALSE	Q	Fixed	FALSE	0	0	0	0	1	1	0	0	Neg	Neg	Neg	Neg	Pos
Q646	HGR YASA-BONGA	No	Neg	NA	Neg	Neg	NA	Neg	Neg	Neg	Neg	0	0	0	0	Pos	Pos	1+	1+	0	0	NA	0	28/07/2015	NA	NA	Yes	24	Not ambiguous	Not ambiguous	4325	Neg	FALSE	Q	Fixed	FALSE	0	0	0	0	1	1	0	0	Neg	Neg	Neg	Neg	Pos
Q626	HGR YASA-BONGA	No	Neg	NA	Neg	Neg	NA	Pos	Neg	Neg	Neg	0	0	0	0	Neg	Neg	0	0	0	0	NA	0	27/07/2015	NA	NA	Yes	42	Not ambiguous	Not ambiguous	4327	Neg	FALSE	Q	Fixed	FALSE	0	0	0	0	0	0	0	0	Neg	Neg	Neg	Neg	Neg
F462	HGR/KWAMOUTH	No	Neg	NA	Neg	Neg	NA	Pos	Pos	Neg	Neg	0	0	0	0	Pos	Pos	1+	1+	1+	1+	NA	0	27/08/2015	NA	NA	Yes	25	Not ambiguous	Not ambiguous	4353	Neg	FALSE	F	Fixed	FALSE	0	0	0	0	1	1	1	1	Neg	Neg	Neg	Neg	Pos
F423	HGR/KWAMOUTH	No	Neg	NA	Neg	Neg	NA	Neg	Neg	Neg	Neg	0	0	0	0	Pos	Pos	1+	1+	0	0	NA	0	27/08/2015	NA	NA	Yes	31	Not ambiguous	Not ambiguous	4355	Neg	FALSE	F	Fixed	FALSE	0	0	0	0	1	1	0	0	Neg	Neg	Neg	Neg	Pos
F438	HGR/KWAMOUTH	No	Neg	NA	Neg	Neg	NA	Neg	Neg	Neg	Neg	0	0	0	0	Pos	Pos	0	0	1+	1+	NA	0	26/08/2015	NA	NA	Yes	31	Not ambiguous	Not ambiguous	4357	Neg	FALSE	F	Fixed	FALSE	0	0	0	0	0	0	1	1	Neg	Neg	Neg	Neg	Neg
F417	HGR/KWAMOUTH	No	Neg	NA	Neg	Neg	NA	Neg	Neg	Neg	Neg	0	0	0	0	Pos	Pos	1+	1+	1+	1+	NA	0	26/08/2015	NA	NA	Yes	52	Not ambiguous	Not ambiguous	4359	Neg	FALSE	F	Fixed	FALSE	0	0	0	0	1	1	1	1	Neg	Neg	Neg	Neg	Pos
F393	HGR/KWAMOUTH	No	Neg	NA	Neg	Neg	NA	Neg	Neg	Neg	Neg	0	0	0	0	Pos	Pos	1+	1+	0	0	NA	0	26/08/2015	NA	NA	Yes	36	Not ambiguous	Not ambiguous	4361	Neg	FALSE	F	Fixed	FALSE	0	0	0	0	1	1	0	0	Neg	Neg	Neg	Neg	Pos
F285	HGR/KWAMOUTH	No	Neg	NA	Neg	Neg	NA	Pos	Pos	Neg	Neg	0	0	0	0	Neg	Neg	0	0	0	0	NA	0	15/08/2015	NA	NA	Yes	1	Not ambiguous	Not ambiguous	4363	Neg	FALSE	F	Fixed	FALSE	0	0	0	0	0	0	0	0	Neg	Neg	Neg	Neg	Neg
F269	HGR/KWAMOUTH	No	Neg	NA	Neg	Neg	NA	Neg	Neg	Neg	Neg	0	0	0	0	Pos	Neg	0	0	1+	0	NA	0	25/08/2015	NA	NA	Yes	33	Not ambiguous	Not ambiguous	4365	Neg	FALSE	F	Fixed	FALSE	0	0	0	0	0	0	1	0	Neg	Neg	Neg	Neg	Neg
F297	HGR/KWAMOUTH	No	Neg	NA	Neg	Neg	NA	Neg	Neg	Neg	Neg	0	0	0	0	Pos	Pos	0	0	1+	1+	NA	0	14/08/2015	NA	NA	Yes	6	Not ambiguous	Not ambiguous	4368	Neg	FALSE	F	Fixed	FALSE	0	0	0	0	0	0	1	1	Neg	Neg	Neg	Neg	Neg
F088	HGR/KWAMOUTH	No	Neg	NA	Neg	Neg	NA	Neg	Neg	Neg	Neg	0	0	0	0	Pos	Pos	0	0	1+	1+	NA	0	28/07/2015	NA	NA	Yes	4	Not ambiguous	Not ambiguous	4371	Neg	FALSE	F	Fixed	FALSE	0	0	0	0	0	0	1	1	Neg	Neg	Neg	Neg	Neg
F173	HGR/KWAMOUTH	No	Neg	NA	Neg	Neg	NA	Pos	Pos	Neg	Neg	0	0	0	0	Pos	Pos	0	0	1+	1+	NA	0	03/08/2015	NA	NA	Yes	55	Not ambiguous	Not ambiguous	4374	Neg	FALSE	F	Fixed	FALSE	0	0	0	0	0	0	1	1	Neg	Neg	Neg	Neg	Neg
F181	HGR/KWAMOUTH	No	Neg	NA	Neg	Neg	NA	Neg	Neg	Neg	Neg	0	0	0	0	Pos	Pos	0	0	1+	1+	NA	0	03/08/2015	NA	NA	Yes	11	Not ambiguous	Not ambiguous	4376	Neg	FALSE	F	Fixed	FALSE	0	0	0	0	0	0	1	1	Neg	Neg	Neg	Neg	Neg
F189	HGR/KWAMOUTH	No	Neg	NA	Neg	Neg	NA	Neg	Neg	Neg	Neg	0	0	0	0	Pos	Pos	0	0	1+	1+	NA	0	04/08/2015	NA	NA	Yes	5	Not ambiguous	Not ambiguous	4378	Neg	FALSE	F	Fixed	FALSE	0	0	0	0	0	0	1	1	Neg	Neg	Neg	Neg	Neg
F229	HGR/KWAMOUTH	No	Neg	NA	Neg	Neg	NA	Neg	Neg	Neg	Neg	0	0	0	0	Pos	Pos	1+	1+	0	0	NA	0	11/08/2015	NA	NA	Yes	39	Not ambiguous	Not ambiguous	4382	Neg	FALSE	F	Fixed	FALSE	0	0	0	0	1	1	0	0	Neg	Neg	Neg	Neg	Pos
F244	HGR/KWAMOUTH	No	Neg	NA	Neg	Neg	NA	Neg	Neg	Neg	Neg	0	0	0	0	Pos	Pos	0	0	1+	1+	NA	0	12/08/2015	NA	NA	Yes	52	Not ambiguous	Not ambiguous	4384	Neg	FALSE	F	Fixed	FALSE	0	0	0	0	0	0	1	1	Neg	Neg	Neg	Neg	Neg
F243	HGR/KWAMOUTH	No	Neg	Pos	Pos	Neg	NA	Pos	Pos	Pos	Pos	1+	1+	2+	2+	Pos	Pos	1+	1+	1+	1+	NA	0	11/08/2015	99	350	Yes	31	Not ambiguous	Not ambiguous	4388	Pos	TRUE	F	Fixed	FALSE	1	1	1	1	1	1	1	1	Pos	Pos	Pos	Pos	Pos
F468	HGR/KWAMOUTH	No	Neg	Pos	Neg	Neg	NA	Pos	Pos	Pos	Pos	1+	1+	1+	1+	Pos	Pos	1+	1+	1+	0	NA	0	27/08/2015	99	380	Yes	32	Not ambiguous	Not ambiguous	4391	Pos	TRUE	F	Fixed	FALSE	1	1	1	1	1	1	1	0	Pos	Pos	Pos	Pos	Pos
F464	HGR/KWAMOUTH	No	Neg	Pos	Neg	Neg	NA	Pos	Pos	Pos	Pos	1+	1+	1+	1+	Pos	Pos	1+	1+	1+	0	NA	0	27/08/2015	99	380	Yes	32	Not ambiguous	Not ambiguous	4393	Pos	TRUE	F	Fixed	FALSE	1	1	1	1	1	1	1	0	Pos	Pos	Pos	Pos	Pos
F453	HGR/KWAMOUTH	No	Neg	NA	Neg	Neg	NA	Neg	Neg	Neg	Neg	0	0	0	0	Pos	Pos	0	0	1+	1+	NA	0	29/08/2015	NA	NA	Yes	20	Not ambiguous	Not ambiguous	4395	Neg	FALSE	F	Fixed	FALSE	0	0	0	0	0	0	1	1	Neg	Neg	Neg	Neg	Neg
F452	HGR/KWAMOUTH	No	Neg	NA	Neg	Neg	NA	Neg	Neg	Neg	Neg	0	0	0	0	Pos	Pos	1+	1+	0	0	NA	0	29/08/2015	NA	NA	Yes	20	Not ambiguous	Not ambiguous	4397	Neg	FALSE	F	Fixed	FALSE	0	0	0	0	1	1	0	0	Neg	Neg	Neg	Neg	Pos
F413	HGR/KWAMOUTH	No	Neg	NA	Neg	Neg	NA	Neg	Neg	Neg	Neg	0	0	0	0	Pos	Pos	0	0	1+	1+	NA	0	29/08/2015	NA	NA	Yes	3	Not ambiguous	Not ambiguous	4399	Neg	FALSE	F	Fixed	FALSE	0	0	0	0	0	0	1	1	Neg	Neg	Neg	Neg	Neg
F406	HGR/KWAMOUTH	No	Neg	NA	Neg	Neg	NA	Neg	Neg	Neg	Neg	0	0	0	0	Pos	Pos	0	0	1+	1+	NA	0	29/08/2015	NA	NA	Yes	30	Not ambiguous	Not ambiguous	4401	Neg	FALSE	F	Fixed	FALSE	0	0	0	0	0	0	1	1	Neg	Neg	Neg	Neg	Neg
F349	HGR/KWAMOUTH	No	Neg	NA	Neg	Neg	NA	Neg	Neg	Neg	Neg	0	0	0	0	Pos	Pos	0	0	1+	1+	NA	0	29/08/2015	NA	NA	Yes	1	Not ambiguous	Not ambiguous	4403	Neg	FALSE	F	Fixed	FALSE	0	0	0	0	0	0	1	1	Neg	Neg	Neg	Neg	Neg
F330	HGR/KWAMOUTH	No	Neg	NA	Neg	Neg	NA	Neg	Neg	Pos	Pos	0	0	1+	1+	Neg	Neg	0	0	0	0	NA	0	29/08/2015	NA	NA	Yes	16	Not ambiguous	Not ambiguous	4405	Neg	FALSE	F	Fixed	FALSE	0	0	1	1	0	0	0	0	Neg	Neg	Pos	Pos	Neg
F296	HGR/KWAMOUTH	No	Neg	NA	Neg	Neg	NA	Neg	Neg	Pos	Pos	0	0	1+	1+	Pos	Pos	1+	1+	0	0	NA	0	29/08/2015	NA	NA	Yes	8	Not ambiguous	Not ambiguous	4407	Neg	FALSE	F	Fixed	FALSE	0	0	1	1	1	1	0	0	Neg	Neg	Pos	Pos	Pos
F294	HGR/KWAMOUTH	No	Neg	NA	Neg	Neg	NA	Neg	Neg	Neg	Neg	0	0	0	0	Pos	Pos	0	0	1+	1+	NA	0	29/08/2015	NA	NA	Yes	21	Not ambiguous	Not ambiguous	4409	Neg	FALSE	F	Fixed	FALSE	0	0	0	0	0	0	1	1	Neg	Neg	Neg	Neg	Neg
F273	HGR/KWAMOUTH	No	Neg	NA	Neg	Neg	NA	Neg	Neg	Neg	Neg	0	0	0	0	Pos	Pos	0	0	1+	1+	NA	0	29/08/2015	NA	NA	Yes	17	Not ambiguous	Not ambiguous	4411	Neg	FALSE	F	Fixed	FALSE	0	0	0	0	0	0	1	1	Neg	Neg	Neg	Neg	Neg
F482	HGR/KWAMOUTH	No	Neg	NA	Neg	Neg	NA	Neg	Neg	Neg	Neg	0	0	0	0	Pos	Pos	1+	1+	0	0	NA	0	28/08/2015	NA	NA	Yes	60	Not ambiguous	Not ambiguous	4413	Neg	FALSE	F	Fixed	FALSE	0	0	0	0	1	1	0	0	Neg	Neg	Neg	Neg	Pos
F480	HGR/KWAMOUTH	No	Neg	NA	Neg	Neg	NA	Neg	Neg	Pos	Pos	1+	1+	0	0	Neg	Neg	0	0	0	0	NA	0	28/08/2015	99	NA	Yes	40	Not ambiguous	Not ambiguous	4415	Neg	FALSE	F	Fixed	FALSE	1	1	0	0	0	0	0	0	Pos	Pos	Neg	Neg	Neg
F284	HGR/KWAMOUTH	No	Neg	NA	Neg	Neg	NA	Neg	Neg	Pos	Pos	1+	1+	0	0	Neg	Neg	0	0	0	0	NA	0	24/08/2015	99	NA	Yes	17	Not ambiguous	Not ambiguous	4417	Neg	FALSE	F	Fixed	FALSE	1	1	0	0	0	0	0	0	Pos	Pos	Neg	Neg	Neg
F410	HGR/KWAMOUTH	No	Neg	NA	Neg	Neg	NA	Neg	Neg	Neg	Neg	0	0	0	0	Pos	Pos	0	0	1+	1+	NA	0	28/08/2015	NA	NA	Yes	6	Not ambiguous	Not ambiguous	4419	Neg	FALSE	F	Fixed	FALSE	0	0	0	0	0	0	1	1	Neg	Neg	Neg	Neg	Neg
F408	HGR/KWAMOUTH	No	Neg	NA	Neg	Neg	NA	Neg	Neg	Neg	Neg	0	0	0	0	Pos	Pos	1+	1+	0	0	NA	0	28/08/2015	NA	NA	Yes	14	Not ambiguous	Not ambiguous	4421	Neg	FALSE	F	Fixed	FALSE	0	0	0	0	1	1	0	0	Neg	Neg	Neg	Neg	Pos
F319	HGR/KWAMOUTH	No	Neg	NA	Neg	Neg	NA	Neg	Neg	Pos	Pos	1+	1+	0	0	Pos	Pos	0	0	1+	1+	NA	0	24/08/2015	99	NA	Yes	32	Not ambiguous	Not ambiguous	4423	Neg	FALSE	F	Fixed	FALSE	1	1	0	0	0	0	1	1	Pos	Pos	Neg	Neg	Neg
F363	HGR/KWAMOUTH	No	Neg	NA	Neg	Neg	NA	Neg	Neg	Neg	Neg	0	0	0	0	Pos	Pos	1+	1+	1+	1+	NA	0	28/08/2015	NA	NA	Yes	28	Not ambiguous	Not ambiguous	4427	Neg	FALSE	F	Fixed	FALSE	0	0	0	0	1	1	1	1	Neg	Neg	Neg	Neg	Pos
F300	HGR/KWAMOUTH	No	Neg	NA	Neg	Neg	NA	Neg	Neg	Neg	Neg	0	0	0	0	Pos	Pos	1+	1+	1+	1+	NA	0	28/08/2015	NA	NA	Yes	42	Not ambiguous	Not ambiguous	4429	Neg	FALSE	F	Fixed	FALSE	0	0	0	0	1	1	1	1	Neg	Neg	Neg	Neg	Pos
F328	HGR/KWAMOUTH	No	Neg	NA	Neg	Neg	NA	Neg	Neg	Neg	Neg	0	0	0	0	Pos	Pos	1+	1+	1+	1+	NA	0	24/08/2015	NA	NA	Yes	38	Not ambiguous	Not ambiguous	4431	Neg	FALSE	F	Fixed	FALSE	0	0	0	0	1	1	1	1	Neg	Neg	Neg	Neg	Pos
F471	HGR/KWAMOUTH	No	Neg	NA	Neg	Neg	NA	Neg	Neg	Neg	Neg	0	0	0	0	Pos	Pos	1+	1+	1+	1+	NA	0	27/08/2015	NA	NA	Yes	52	Not ambiguous	Not ambiguous	4433	Neg	FALSE	F	Fixed	FALSE	0	0	0	0	1	1	1	1	Neg	Neg	Neg	Neg	Pos
F425	HGR/KWAMOUTH	No	Neg	NA	Neg	Neg	NA	Neg	Neg	Neg	Neg	0	0	0	0	Pos	Pos	1+	1+	0	0	NA	0	24/08/2015	NA	NA	Yes	47	Not ambiguous	Not ambiguous	4435	Neg	FALSE	F	Fixed	FALSE	0	0	0	0	1	1	0	0	Neg	Neg	Neg	Neg	Pos
F292	HGR/KWAMOUTH	No	Neg	NA	Neg	Neg	NA	Neg	Neg	Neg	Neg	0	0	0	0	Pos	Pos	0	0	1+	1+	NA	0	23/08/2015	NA	NA	Yes	29	Not ambiguous	Not ambiguous	4437	Neg	FALSE	F	Fixed	FALSE	0	0	0	0	0	0	1	1	Neg	Neg	Neg	Neg	Neg
F325	HGR/KWAMOUTH	No	Neg	NA	Neg	Neg	NA	Neg	Neg	Neg	Neg	0	0	0	0	Pos	Pos	0	0	1+	1+	NA	0	25/08/2015	NA	NA	Yes	3	Not ambiguous	Not ambiguous	4439	Neg	FALSE	F	Fixed	FALSE	0	0	0	0	0	0	1	1	Neg	Neg	Neg	Neg	Neg
F334	HGR/KWAMOUTH	No	Neg	NA	Neg	Neg	NA	Neg	Neg	Neg	Neg	0	0	0	0	Pos	Pos	0	0	1+	1+	NA	0	25/08/2015	NA	NA	Yes	51	Not ambiguous	Not ambiguous	4441	Neg	FALSE	F	Fixed	FALSE	0	0	0	0	0	0	1	1	Neg	Neg	Neg	Neg	Neg
F347	HGR/KWAMOUTH	No	Neg	NA	Neg	Neg	NA	Pos	Pos	Pos	Pos	1+	1+	0	0	Pos	Pos	0	0	1+	1+	NA	0	25/08/2015	99	NA	Yes	12	Not ambiguous	Not ambiguous	4443	Neg	FALSE	F	Fixed	FALSE	1	1	0	0	0	0	1	1	Pos	Pos	Neg	Neg	Neg
F554	HGR/KWAMOUTH	No	Neg	NA	Neg	Neg	NA	Neg	Neg	Neg	Neg	0	0	0	0	Pos	Pos	1+	1+	0	0	NA	0	05/09/2015	NA	NA	Yes	1	Not ambiguous	Not ambiguous	4446	Neg	FALSE	F	Fixed	FALSE	0	0	0	0	1	1	0	0	Neg	Neg	Neg	Neg	Pos
F549	HGR/KWAMOUTH	No	Neg	NA	Neg	Neg	NA	Neg	Neg	Pos	Pos	1+	1+	0	0	Neg	Neg	0	0	0	0	NA	0	04/09/2015	99	NA	Yes	22	Not ambiguous	Not ambiguous	4449	Neg	FALSE	F	Fixed	FALSE	1	1	0	0	0	0	0	0	Pos	Pos	Neg	Neg	Neg
F545	HGR/KWAMOUTH	No	Neg	NA	Neg	Neg	NA	Pos	Pos	Neg	Neg	0	0	0	0	Neg	Neg	0	0	0	0	NA	0	04/09/2015	NA	NA	Yes	10	Not ambiguous	Not ambiguous	4452	Neg	FALSE	F	Fixed	FALSE	0	0	0	0	0	0	0	0	Neg	Neg	Neg	Neg	Neg
F526	HGR/KWAMOUTH	No	Neg	NA	Neg	Neg	NA	Neg	Neg	Pos	Pos	1+	1+	1+	1+	Pos	Pos	1+	1+	0	0	NA	0	02/09/2015	99	NA	Yes	39	Not ambiguous	Not ambiguous	4455	Neg	FALSE	F	Fixed	FALSE	1	1	1	1	1	1	0	0	Pos	Pos	Pos	Pos	Pos
F502	HGR/KWAMOUTH	No	Neg	NA	Neg	Neg	NA	Neg	Neg	Pos	Pos	1+	1+	0	0	Pos	Pos	0	0	1+	1+	NA	0	31/08/2015	99	NA	Yes	4	Not ambiguous	Not ambiguous	4458	Neg	FALSE	F	Fixed	FALSE	1	1	0	0	0	0	1	1	Pos	Pos	Neg	Neg	Neg
F501	HGR/KWAMOUTH	No	Neg	NA	Neg	Neg	NA	Neg	Neg	Neg	Neg	0	0	0	0	Pos	Pos	0	0	1+	1+	NA	0	31/08/2015	NA	NA	Yes	24	Not ambiguous	Not ambiguous	4460	Neg	FALSE	F	Fixed	FALSE	0	0	0	0	0	0	1	1	Neg	Neg	Neg	Neg	Neg
F498	HGR/KWAMOUTH	No	Neg	NA	Neg	Neg	NA	Neg	Neg	Neg	Neg	0	0	0	0	Pos	Pos	0	0	1+	1+	NA	0	31/08/2015	NA	NA	Yes	5	Not ambiguous	Not ambiguous	4462	Neg	FALSE	F	Fixed	FALSE	0	0	0	0	0	0	1	1	Neg	Neg	Neg	Neg	Neg
F488	HGR/KWAMOUTH	No	Neg	NA	Neg	Neg	NA	Pos	Neg	Neg	Neg	0	0	0	0	Pos	Pos	1+	1+	0	0	NA	0	29/08/2015	NA	NA	Yes	58	Not ambiguous	Not ambiguous	4464	Neg	FALSE	F	Fixed	FALSE	0	0	0	0	1	1	0	0	Neg	Neg	Neg	Neg	Pos
F490	HGR/KWAMOUTH	No	Neg	NA	Neg	Neg	NA	Neg	Neg	Neg	Neg	0	0	0	0	Pos	Pos	0	0	1+	1+	NA	0	29/08/2015	NA	NA	Yes	34	Not ambiguous	Not ambiguous	4466	Neg	FALSE	F	Fixed	FALSE	0	0	0	0	0	0	1	1	Neg	Neg	Neg	Neg	Neg
C1991	UM/MUSHIE	No	Neg	NA	Neg	Neg	NA	Neg	Neg	Pos	Pos	1+	1+	1+	1+	Neg	Neg	0	0	0	0	NA	0	26/06/2015	42	NA	Yes	13	Not ambiguous	Not ambiguous	4470	Neg	FALSE	C	Mobile	FALSE	1	1	1	1	0	0	0	0	Pos	Pos	Pos	Pos	Neg
E2960	IDIOFA	No	Pos	Neg	Neg	Neg	NA	Pos	Pos	Neg	Neg	0	0	0	0	Pos	Pos	1+	1+	0	0	NA	0	20/06/2015	NA	2	Yes	76	Not ambiguous	Not ambiguous	4472	Pos	TRUE	E	Mobile	FALSE	0	0	0	0	1	1	0	0	Neg	Neg	Neg	Neg	Pos
F251	HGR/KWAMOUTH	No	Neg	NA	Neg	Neg	NA	Neg	Neg	Neg	Neg	0	0	0	0	Pos	Pos	0	0	1+	1+	NA	0	12/08/2015	NA	NA	Yes	22	Not ambiguous	Not ambiguous	4478	Neg	FALSE	F	Fixed	FALSE	0	0	0	0	0	0	1	1	Neg	Neg	Neg	Neg	Neg
F245	HGR/KWAMOUTH	No	Neg	NA	Neg	Neg	NA	Neg	Neg	Neg	Neg	0	0	0	0	Pos	Pos	1+	1+	0	0	NA	0	12/08/2015	NA	NA	Yes	54	Not ambiguous	Not ambiguous	4480	Neg	FALSE	F	Fixed	FALSE	0	0	0	0	1	1	0	0	Neg	Neg	Neg	Neg	Pos
F235	HGR/KWAMOUTH	No	Neg	NA	Neg	Neg	NA	Neg	Neg	Pos	Pos	0	0	1+	1+	Neg	Neg	0	0	0	0	NA	0	11/08/2015	NA	NA	Yes	29	Not ambiguous	Not ambiguous	4482	Neg	FALSE	F	Fixed	FALSE	0	0	1	1	0	0	0	0	Neg	Neg	Pos	Pos	Neg
F227	HGR/KWAMOUTH	No	Neg	NA	Neg	Neg	NA	Neg	Neg	Pos	Pos	0	0	1+	1+	Neg	Neg	0	0	0	0	NA	0	11/08/2015	NA	NA	Yes	25	Not ambiguous	Not ambiguous	4484	Neg	FALSE	F	Fixed	FALSE	0	0	1	1	0	0	0	0	Neg	Neg	Pos	Pos	Neg
F226	HGR/KWAMOUTH	No	Neg	NA	Neg	Neg	NA	Neg	Neg	Neg	Neg	0	0	0	0	Pos	Pos	1+	1+	0	0	NA	0	11/08/2015	NA	NA	Yes	38	Not ambiguous	Not ambiguous	4489	Neg	FALSE	F	Fixed	FALSE	0	0	0	0	1	1	0	0	Neg	Neg	Neg	Neg	Pos
F165	HGR/KWAMOUTH	No	Neg	NA	Neg	Neg	NA	Pos	Pos	Pos	Pos	1+	1+	0	0	Pos	Pos	1+	1+	1+	1+	NA	0	11/08/2015	99	NA	Yes	14	Not ambiguous	Not ambiguous	4497	Neg	FALSE	F	Fixed	FALSE	1	1	0	0	1	1	1	1	Pos	Pos	Neg	Neg	Pos
F210	HGR/KWAMOUTH	No	Neg	NA	Neg	Neg	NA	Neg	Neg	Neg	Neg	0	0	0	0	Pos	Pos	0	0	1+	2+	NA	0	10/08/2015	NA	NA	Yes	31	Not ambiguous	Not ambiguous	4500	Neg	FALSE	F	Fixed	FALSE	0	0	0	0	0	0	1	1	Neg	Neg	Neg	Neg	Neg
F196	HGR/KWAMOUTH	No	Neg	NA	Neg	Neg	NA	Pos	Pos	Neg	Neg	0	0	0	0	Pos	Pos	1+	1+	1+	1+	NA	0	04/08/2015	NA	NA	Yes	23	Not ambiguous	Not ambiguous	4503	Neg	FALSE	F	Fixed	FALSE	0	0	0	0	1	1	1	1	Neg	Neg	Neg	Neg	Pos
F104	HGR/KWAMOUTH	No	Neg	NA	Neg	Neg	NA	Neg	Neg	Pos	Pos	1+	1+	1+	1+	Neg	Neg	0	0	0	0	NA	0	28/07/2015	99	NA	Yes	20	Not ambiguous	Not ambiguous	4507	Neg	FALSE	F	Fixed	FALSE	1	1	1	1	0	0	0	0	Pos	Pos	Pos	Pos	Neg
F097	HGR/KWAMOUTH	No	Neg	NA	Neg	Neg	NA	Neg	Neg	Pos	Pos	1+	1+	1+	1+	Neg	Neg	0	0	0	0	NA	0	28/07/2015	99	NA	Yes	23	Not ambiguous	Not ambiguous	4512	Neg	FALSE	F	Fixed	FALSE	1	1	1	1	0	0	0	0	Pos	Pos	Pos	Pos	Neg
F078	HGR/KWAMOUTH	No	Neg	NA	Neg	Neg	NA	Neg	Neg	Pos	Pos	1+	1+	0	0	Neg	Neg	0	0	0	0	NA	0	27/07/2015	99	NA	Yes	4	Not ambiguous	Not ambiguous	4515	Neg	FALSE	F	Fixed	FALSE	1	1	0	0	0	0	0	0	Pos	Pos	Neg	Neg	Neg
F076	HGR/KWAMOUTH	No	Neg	NA	Neg	Neg	NA	Neg	Neg	Neg	Neg	0	0	0	0	Pos	Pos	1+	1+	0	0	NA	0	27/07/2015	NA	NA	Yes	20	Not ambiguous	Not ambiguous	4517	Neg	FALSE	F	Fixed	FALSE	0	0	0	0	1	1	0	0	Neg	Neg	Neg	Neg	Pos
F 248	HGR/KWAMOUTH	No	Neg	NA	Neg	Neg	NA	Pos	Pos	Neg	Neg	0	0	0	0	Pos	Pos	1+	1+	0	0	NA	0	12/08/2015	NA	NA	Yes	55	Not ambiguous	Not ambiguous	4554	Neg	FALSE	F	Fixed	FALSE	0	0	0	0	1	1	0	0	Neg	Neg	Neg	Neg	Pos
F407	HGR/KWAMOUTH	No	NA	Pos	NA	NA	Pos	Pos	Pos	Pos	Pos	1+	1+	3+	2+	Pos	Pos	1+	1+	1+	1+	NA	0	22/08/2015	5	183	Yes	30	Not ambiguous	Not ambiguous	4573	Pos	TRUE	F	Fixed	FALSE	1	1	1	1	1	1	1	1	Pos	Pos	Pos	Pos	Pos
F456	HGR/KWAMOUTH	No	Neg	NA	Neg	Neg	NA	Neg	Neg	Pos	Pos	1+	1+	0	0	Neg	Neg	0	0	0	0	NA	0	26/08/2015	5	NA	Yes	40	Not ambiguous	Not ambiguous	4575	Neg	FALSE	F	Fixed	FALSE	1	1	0	0	0	0	0	0	Pos	Pos	Neg	Neg	Neg
F276	HGR/KWAMOUTH	No	Neg	NA	Neg	Neg	NA	Neg	Neg	Pos	Pos	1+	1+	0	0	Pos	Pos	1+	1+	0	0	NA	0	24/08/2015	5	NA	Yes	29	Not ambiguous	Not ambiguous	4577	Neg	FALSE	F	Fixed	FALSE	1	1	0	0	1	1	0	0	Pos	Pos	Neg	Neg	Pos
F141	HGR/KWAMOUTH	No	Neg	NA	Neg	Neg	NA	Neg	Neg	Pos	Pos	0	0	1+	1+	Pos	Pos	1+	1+	0	0	NA	0	30/07/2015	NA	NA	Yes	18	Ambiguous	Ambiguous	4579	Neg	FALSE	F	Fixed	FALSE	0	0	1	1	1	1	0	0	Neg	Neg	Pos	Pos	Pos
F199	HGR/KWAMOUTH	No	Neg	NA	Neg	Neg	NA	Pos	Pos	Pos	Pos	1+	0	0	1+	Neg	Neg	0	0	0	0	NA	0	04/08/2015	1	NA	Yes	52	Not ambiguous	Not ambiguous	4581	Neg	FALSE	F	Fixed	FALSE	1	0	0	1	0	0	0	0	Pos	Neg	Neg	Pos	Neg
F515	HGR/KWAMOUTH	No	Neg	NA	Neg	Neg	NA	Neg	Neg	Neg	Neg	0	0	0	0	Pos	Pos	1+	1+	0	0	NA	0	02/09/2015	NA	NA	Yes	27	Not ambiguous	Not ambiguous	4583	Neg	FALSE	F	Fixed	FALSE	0	0	0	0	1	1	0	0	Neg	Neg	Neg	Neg	Pos
F275	HGR/KWAMOUTH	No	Neg	NA	Neg	Neg	NA	Neg	Neg	Pos	Pos	1+	1+	1+	1+	Pos	Pos	1+	1+	1+	0	NA	0	24/08/2015	5	NA	Yes	7	Not ambiguous	Not ambiguous	4585	Neg	FALSE	F	Fixed	FALSE	1	1	1	1	1	1	1	0	Pos	Pos	Pos	Pos	Pos
F316	HGR/KWAMOUTH	No	Neg	NA	Neg	Neg	NA	Neg	Neg	Pos	Pos	1+	1+	1+	1+	Pos	Pos	1+	1+	0	0	NA	0	31/08/2015	8	NA	Yes	40	Not ambiguous	Not ambiguous	4587	Neg	FALSE	F	Fixed	FALSE	1	1	1	1	1	1	0	0	Pos	Pos	Pos	Pos	Pos
F426	HGR/KWAMOUTH	No	Neg	NA	Neg	Neg	NA	Neg	Neg	Neg	Neg	0	0	0	0	Pos	Pos	0	0	1+	1+	NA	0	24/08/2015	NA	NA	Yes	53	Not ambiguous	Not ambiguous	4589	Neg	FALSE	F	Fixed	FALSE	0	0	0	0	0	0	1	1	Neg	Neg	Neg	Neg	Neg
D2211	UM/MOKALA	No	Neg	NA	Neg	Neg	NA	Neg	Neg	Neg	Neg	0	0	0	0	Pos	Pos	0	0	2+	2+	NA	0	28/07/2015	NA	NA	Yes	46	Not ambiguous	Not ambiguous	4617	Neg	FALSE	D	Mobile	FALSE	0	0	0	0	0	0	1	1	Neg	Neg	Neg	Neg	Neg
N860	MASAMUNA	No	Pos	Neg	NA	Pos	NA	Pos	Pos	Pos	Pos	2+	2+	2+	2+	Pos	Pos	1+	1+	1+	1+	NA	0	11/09/2015	NA	13	Yes	30	Not ambiguous	Not ambiguous	4619	Pos	TRUE	N	Fixed	FALSE	1	1	1	1	1	1	1	1	Pos	Pos	Pos	Pos	Pos
N870	MASAMUNA	No	Pos	Pos	NA	NA	NA	Pos	Pos	Pos	Pos	1+	1+	3+	3+	Pos	Pos	2+	2+	2+	2+	NA	0	14/09/2015	5	1805	Yes	18	Not ambiguous	Not ambiguous	4621	Pos	TRUE	N	Fixed	FALSE	1	1	1	1	1	1	1	1	Pos	Pos	Pos	Pos	Pos
N903	MASAMUNA	No	Neg	Pos	Pos	NA	NA	Pos	Pos	Pos	Pos	3+	3+	3+	3+	Pos	Pos	3+	3+	3+	3+	NA	0	17/09/2015	NA	239	Yes	47	Not ambiguous	Not ambiguous	4623	Pos	TRUE	N	Fixed	FALSE	1	1	1	1	1	1	1	1	Pos	Pos	Pos	Pos	Pos
N768	MASAMUNA	No	Neg	NA	Neg	Neg	NA	Neg	Neg	Neg	Neg	0	0	0	0	Neg	Neg	0	0	0	0	NA	0	26/08/2015	NA	NA	Yes	22	Not ambiguous	Not ambiguous	4629	Neg	FALSE	N	Fixed	FALSE	0	0	0	0	0	0	0	0	Neg	Neg	Neg	Neg	Neg
N798	MASAMUNA	No	Neg	NA	Neg	Neg	NA	Neg	Neg	Neg	Neg	0	0	0	0	Neg	Neg	0	0	0	0	NA	0	01/09/2015	NA	NA	Yes	17	Not ambiguous	Not ambiguous	4631	Neg	FALSE	N	Fixed	FALSE	0	0	0	0	0	0	0	0	Neg	Neg	Neg	Neg	Neg
N801	MASAMUNA	No	Neg	NA	Neg	Neg	NA	Neg	Neg	Neg	Neg	0	0	0	0	Pos	Pos	1+	1+	1+	1+	NA	0	02/09/2015	NA	NA	Yes	47	Not ambiguous	Not ambiguous	4633	Neg	FALSE	N	Fixed	FALSE	0	0	0	0	1	1	1	1	Neg	Neg	Neg	Neg	Pos
N802	MASAMUNA	No	Neg	NA	Neg	Neg	NA	Neg	Neg	Pos	Pos	0	0	2+	2+	Neg	Neg	0	0	0	0	NA	0	02/09/2015	NA	NA	Yes	28	Not ambiguous	Not ambiguous	4635	Neg	FALSE	N	Fixed	FALSE	0	0	1	1	0	0	0	0	Neg	Neg	Pos	Pos	Neg
N806	MASAMUNA	No	Neg	NA	Neg	Neg	NA	Neg	Neg	Pos	Pos	2+	2+	0	0	Neg	Neg	0	0	0	0	NA	0	03/09/2015	NA	NA	Yes	17	Not ambiguous	Not ambiguous	4637	Neg	FALSE	N	Fixed	FALSE	1	1	0	0	0	0	0	0	Pos	Pos	Neg	Neg	Neg
N808	MASAMUNA	No	Neg	NA	Neg	Neg	NA	Neg	Neg	Neg	Neg	0	0	0	0	Neg	Neg	0	0	0	0	NA	0	03/09/2015	NA	NA	Yes	20	Not ambiguous	Not ambiguous	4639	Neg	FALSE	N	Fixed	FALSE	0	0	0	0	0	0	0	0	Neg	Neg	Neg	Neg	Neg
N813	MASAMUNA	No	Neg	NA	Neg	Neg	NA	Neg	Neg	Neg	Neg	0	0	0	0	Pos	Pos	0	0	2+	2+	NA	0	04/09/2015	NA	NA	Yes	4	Not ambiguous	Not ambiguous	4641	Neg	FALSE	N	Fixed	FALSE	0	0	0	0	0	0	1	1	Neg	Neg	Neg	Neg	Neg
N842	MASAMUNA	No	Neg	NA	Neg	Neg	NA	Neg	Neg	Neg	Neg	0	0	0	0	Pos	Pos	0	0	1+	1+	NA	0	09/09/2015	NA	NA	Yes	14	Not ambiguous	Not ambiguous	4643	Neg	FALSE	N	Fixed	FALSE	0	0	0	0	0	0	1	1	Neg	Neg	Neg	Neg	Neg
L659	HS NKARA	No	Neg	NA	Neg	Neg	NA	Pos	Pos	Neg	Neg	0	0	0	0	Pos	Pos	0	0	1+	1+	NA	0	07/09/2015	NA	NA	Yes	3	Not ambiguous	Not ambiguous	4687	Neg	FALSE	L	Fixed	FALSE	0	0	0	0	0	0	1	1	Neg	Neg	Neg	Neg	Neg
L754	HS NKARA	No	Neg	NA	Neg	Neg	NA	Neg	Neg	Pos	Pos	2+	2+	2+	2+	Pos	Pos	1+	1+	0	0	NA	0	15/09/2015	NA	NA	Yes	23	Not ambiguous	Not ambiguous	4689	Neg	FALSE	L	Fixed	FALSE	1	1	1	1	1	1	0	0	Pos	Pos	Pos	Pos	Pos
L756	HS NKARA	No	Neg	NA	Neg	Neg	NA	Neg	Neg	Pos	Pos	1+	1+	0	0	Pos	Pos	1+	1+	0	0	NA	0	16/09/2015	5	NA	Yes	24	Not ambiguous	Not ambiguous	4691	Neg	FALSE	L	Fixed	FALSE	1	1	0	0	1	1	0	0	Pos	Pos	Neg	Neg	Pos
L765	HS NKARA	No	Neg	NA	Neg	Neg	NA	Pos	Pos	Neg	Neg	0	0	0	0	Pos	Pos	0	0	2+	2+	NA	0	16/09/2015	NA	NA	Yes	31	Not ambiguous	Not ambiguous	4693	Neg	FALSE	L	Fixed	FALSE	0	0	0	0	0	0	1	1	Neg	Neg	Neg	Neg	Neg
L766	HS NKARA	No	Neg	NA	Neg	Neg	NA	Neg	Neg	Pos	Pos	2+	2+	1+	1+	Neg	Neg	0	0	0	0	NA	0	16/09/2015	NA	NA	Yes	56	Not ambiguous	Not ambiguous	4695	Neg	FALSE	L	Fixed	FALSE	1	1	1	1	0	0	0	0	Pos	Pos	Pos	Pos	Neg
L773	HS NKARA	No	Neg	NA	Neg	Neg	NA	Neg	Neg	Neg	Neg	0	0	0	0	Pos	Pos	0	0	1+	1+	NA	0	17/09/2015	NA	NA	Yes	38	Not ambiguous	Not ambiguous	4699	Neg	FALSE	L	Fixed	FALSE	0	0	0	0	0	0	1	1	Neg	Neg	Neg	Neg	Neg
L786	HS NKARA	No	Neg	NA	Neg	Neg	NA	Neg	Neg	Neg	Neg	0	0	0	0	Pos	Pos	0	0	1+	1+	NA	0	18/09/2015	NA	NA	Yes	53	Not ambiguous	Not ambiguous	4701	Neg	FALSE	L	Fixed	FALSE	0	0	0	0	0	0	1	1	Neg	Neg	Neg	Neg	Neg
L799	HS NKARA	No	Neg	NA	Neg	Neg	NA	Neg	Neg	Neg	Neg	0	0	0	0	Pos	Pos	0	0	1+	1+	NA	0	18/09/2015	NA	NA	Yes	32	Not ambiguous	Not ambiguous	4703	Neg	FALSE	L	Fixed	FALSE	0	0	0	0	0	0	1	1	Neg	Neg	Neg	Neg	Neg
L804	HS NKARA	No	Neg	NA	Neg	Neg	NA	Neg	Neg	Neg	Neg	0	0	0	0	Pos	Pos	0	0	1+	1+	NA	0	19/09/2015	NA	NA	Yes	46	Not ambiguous	Not ambiguous	4705	Neg	FALSE	L	Fixed	FALSE	0	0	0	0	0	0	1	1	Neg	Neg	Neg	Neg	Neg
L816	HS NKARA	No	Neg	NA	Neg	Neg	NA	Neg	Neg	Pos	Pos	2+	2+	1+	1+	Neg	Neg	0	0	0	0	NA	0	21/09/2015	NA	NA	Yes	45	Not ambiguous	Not ambiguous	4707	Neg	FALSE	L	Fixed	FALSE	1	1	1	1	0	0	0	0	Pos	Pos	Pos	Pos	Neg
L838	HS NKARA	No	Neg	NA	Neg	Neg	NA	Neg	Neg	Neg	Neg	0	0	0	0	Pos	Pos	0	0	1+	1+	NA	0	24/09/2015	NA	NA	Yes	42	Not ambiguous	Not ambiguous	4709	Neg	FALSE	L	Fixed	FALSE	0	0	0	0	0	0	1	1	Neg	Neg	Neg	Neg	Neg
L840	HS NKARA	No	Neg	NA	Neg	Neg	NA	Neg	Neg	Neg	Neg	0	0	0	0	Pos	Pos	0	0	1+	1+	NA	0	24/09/2015	NA	NA	Yes	9	Not ambiguous	Not ambiguous	4711	Neg	FALSE	L	Fixed	FALSE	0	0	0	0	0	0	1	1	Neg	Neg	Neg	Neg	Neg
L841	HS NKARA	No	Neg	NA	Neg	Neg	NA	Neg	Neg	Neg	Neg	0	0	0	0	Pos	Pos	0	0	1+	1+	NA	0	24/09/2015	NA	NA	Yes	7	Not ambiguous	Not ambiguous	4713	Neg	FALSE	L	Fixed	FALSE	0	0	0	0	0	0	1	1	Neg	Neg	Neg	Neg	Neg
L846	HS NKARA	No	Neg	NA	Neg	Neg	NA	Neg	Neg	Pos	Pos	1+	1+	0	0	Neg	Neg	0	0	0	0	NA	0	24/09/2015	1	NA	Yes	24	Not ambiguous	Not ambiguous	4715	Neg	FALSE	L	Fixed	FALSE	1	1	0	0	0	0	0	0	Pos	Pos	Neg	Neg	Neg
L727	HS NKARA	No	Neg	Pos	Pos	Pos	Pos	Neg	Neg	Pos	Pos	2+	2+	0	0	Pos	Pos	2+	2+	2+	2+	NA	0	12/09/2015	NA	110	Yes	32	Not ambiguous	Not ambiguous	4717	Pos	TRUE	L	Fixed	FALSE	1	1	0	0	1	1	1	1	Pos	Pos	Neg	Neg	Pos
L734	HS NKARA	No	Neg	Neg	Pos	Pos	NA	Neg	Neg	Pos	Pos	2+	2+	0	0	Pos	Pos	0	0	1+	1+	NA	0	12/09/2015	NA	2	Yes	32	Not ambiguous	Not ambiguous	4719	Pos	TRUE	L	Fixed	FALSE	1	1	0	0	0	0	1	1	Pos	Pos	Neg	Neg	Neg
L777	HS NKARA	No	Neg	Neg	Pos	Pos	NA	Neg	Neg	Neg	Neg	0	0	0	0	Pos	Pos	0	0	3+	3+	NA	0	17/09/2015	NA	2	Yes	32	Not ambiguous	Not ambiguous	4721	Pos	TRUE	L	Fixed	FALSE	0	0	0	0	0	0	1	1	Neg	Neg	Neg	Neg	Neg
L800	HS NKARA	No	Pos	Neg	Pos	Pos	NA	Neg	Neg	Neg	Neg	0	0	0	0	Pos	Pos	1+	1+	2+	2+	NA	0	18/09/2015	NA	0	Yes	10	Not ambiguous	Not ambiguous	4723	Pos	TRUE	L	Fixed	FALSE	0	0	0	0	1	1	1	1	Neg	Neg	Neg	Neg	Pos
L692	HS NKARA	No	Neg	NA	Neg	Neg	NA	Neg	Neg	Pos	Pos	2+	2+	2+	2+	Neg	Neg	0	0	0	0	NA	0	09/09/2015	NA	NA	Yes	20	Not ambiguous	Not ambiguous	4725	Neg	FALSE	L	Fixed	FALSE	1	1	1	1	0	0	0	0	Pos	Pos	Pos	Pos	Neg
L699	HS NKARA	No	Neg	NA	Neg	Neg	NA	Neg	Neg	Neg	Neg	0	0	0	0	Pos	Pos	0	1+	2+	2+	NA	0	09/09/2015	NA	NA	Yes	39	Not ambiguous	Not ambiguous	4727	Neg	FALSE	L	Fixed	FALSE	0	0	0	0	0	1	1	1	Neg	Neg	Neg	Neg	Neg
L700	HS NKARA	No	Neg	NA	Neg	Neg	NA	Neg	Neg	Neg	Neg	0	0	0	0	Pos	Pos	0	0	2+	2+	NA	0	09/09/2015	NA	NA	Yes	35	Not ambiguous	Not ambiguous	4729	Neg	FALSE	L	Fixed	FALSE	0	0	0	0	0	0	1	1	Neg	Neg	Neg	Neg	Neg
L712	HS NKARA	No	Neg	NA	Neg	Neg	NA	Neg	Neg	Pos	Pos	1+	1+	0	0	Pos	Pos	1+	1+	0	0	NA	0	10/09/2015	2	NA	Yes	40	Not ambiguous	Not ambiguous	4735	Neg	FALSE	L	Fixed	FALSE	1	1	0	0	1	1	0	0	Pos	Pos	Neg	Neg	Pos
L728	HS NKARA	No	Neg	NA	Neg	Neg	NA	Neg	Neg	Pos	Pos	2+	2+	0	0	Pos	Pos	0	0	1+	1+	NA	0	12/09/2015	NA	NA	Yes	62	Not ambiguous	Not ambiguous	4738	Neg	FALSE	L	Fixed	FALSE	1	1	0	0	0	0	1	1	Pos	Pos	Neg	Neg	Neg
L730	HS NKARA	No	Neg	NA	Neg	Neg	NA	Neg	Neg	Pos	Pos	1+	1+	0	0	Neg	Neg	0	0	0	0	NA	0	12/09/2015	5	NA	Yes	3	Not ambiguous	Not ambiguous	4741	Neg	FALSE	L	Fixed	FALSE	1	1	0	0	0	0	0	0	Pos	Pos	Neg	Neg	Neg
L731	HS NKARA	No	Neg	NA	Neg	Neg	NA	Neg	Neg	Neg	Neg	0	0	0	0	Pos	Pos	0	0	2+	2+	NA	0	12/09/2015	NA	NA	Yes	35	Not ambiguous	Not ambiguous	4744	Neg	FALSE	L	Fixed	FALSE	0	0	0	0	0	0	1	1	Neg	Neg	Neg	Neg	Neg
L744	HS NKARA	No	Neg	NA	Neg	Neg	NA	Neg	Neg	Neg	Neg	0	0	0	0	Pos	Pos	2+	2+	0	0	NA	0	14/09/2015	NA	NA	Yes	19	Not ambiguous	Not ambiguous	4750	Neg	FALSE	L	Fixed	FALSE	0	0	0	0	1	1	0	0	Neg	Neg	Neg	Neg	Pos
L788	HS NKARA	No	Neg	NA	Neg	Neg	NA	Neg	Neg	Neg	Neg	0	0	0	0	Pos	Pos	1+	1+	0	0	NA	0	18/09/2015	NA	NA	Yes	59	Not ambiguous	Not ambiguous	4752	Neg	FALSE	L	Fixed	FALSE	0	0	0	0	1	1	0	0	Neg	Neg	Neg	Neg	Pos
L845	HS NKARA	No	Neg	NA	Neg	Neg	NA	Pos	Pos	Neg	Neg	0	0	0	0	Pos	Pos	0	0	1+	1+	NA	0	24/09/2015	NA	NA	Yes	3	Not ambiguous	Not ambiguous	4755	Neg	FALSE	L	Fixed	FALSE	0	0	0	0	0	0	1	1	Neg	Neg	Neg	Neg	Neg
B304	KWAMOUTH	No	Pos	Neg	NA	NA	NA	Pos	Pos	Pos	Pos	0	2+	1+	1+	Pos	Pos	4+	4+	0	0	NA	0	21/07/2015	NA	3	Yes	2	Not ambiguous	Not ambiguous	4780	Pos	TRUE	B	Mobile	FALSE	0	1	1	1	1	1	0	0	Neg	Pos	Pos	Pos	Pos
B1315	KWAMOUTH	No	Pos	Neg	NA	NA	NA	Neg	Neg	Pos	Pos	1+	1+	2+	2+	Neg	Neg	0	0	0	0	NA	0	21/07/2015	99	2	Yes	10	Not ambiguous	Not ambiguous	4782	Pos	TRUE	B	Mobile	FALSE	1	1	1	1	0	0	0	0	Pos	Pos	Pos	Pos	Neg
B376	UM/KWAMOUTH	Yes	Pos	Neg	NA	NA	NA	Neg	Neg	Pos	Pos	2+	2+	1+	1+	Neg	Neg	0	0	0	0	NA	0	21/07/2015	NA	2	Yes	3	Not ambiguous	Not ambiguous	4784	Pos	TRUE	B	Mobile	FALSE	1	1	1	1	0	0	0	0	Pos	Pos	Pos	Pos	Neg
B201	UM/ KWAMOUTH	No	Pos	Neg	NA	NA	NA	Neg	Neg	Pos	Pos	1+	1+	0	0	Neg	Neg	0	0	0	0	NA	0	21/07/2015	99	2	Yes	25	Not ambiguous	Not ambiguous	4786	Pos	TRUE	B	Mobile	FALSE	1	1	0	0	0	0	0	0	Pos	Pos	Neg	Neg	Neg
B213	KWAMOUTH	No	Pos	Neg	NA	NA	NA	Neg	Neg	Pos	Pos	1+	1+	2+	2+	Neg	Neg	0	0	0	0	NA	0	21/07/2015	99	2	Yes	18	Not ambiguous	Not ambiguous	4788	Pos	TRUE	B	Mobile	FALSE	1	1	1	1	0	0	0	0	Pos	Pos	Pos	Pos	Neg
B053	KWAMOUTH	No	Pos	Neg	NA	NA	NA	Pos	Pos	Pos	Pos	2+	1+	2+	2+	Pos	Pos	1+	1+	0	0	NA	0	21/07/2015	NA	3	Yes	23	Not ambiguous	Not ambiguous	4790	Pos	TRUE	B	Mobile	FALSE	1	1	1	1	1	1	0	0	Pos	Pos	Pos	Pos	Pos
B041	KWAMOUTH	No	Pos	Neg	NA	NA	NA	Neg	Neg	Neg	Neg	0	0	0	0	Pos	Pos	1+	1+	0	0	NA	0	21/07/2015	NA	2	Yes	7	Not ambiguous	Not ambiguous	4792	Pos	TRUE	B	Mobile	FALSE	0	0	0	0	1	1	0	0	Neg	Neg	Neg	Neg	Pos
BO37	UM/KWAMOUTH	No	Pos	Neg	NA	NA	NA	Neg	Neg	Pos	Pos	1+	1+	1+	0	Neg	Neg	0	0	0	0	NA	0	21/07/2015	99	1	Yes	22	Not ambiguous	Not ambiguous	4794	Pos	TRUE	B	Mobile	FALSE	1	1	1	0	0	0	0	0	Pos	Pos	Pos	Neg	Neg
B031	KWAMOUTH	No	Pos	Neg	NA	NA	NA	Neg	Neg	Neg	Neg	0	0	0	0	Pos	Pos	1+	1+	0	0	NA	0	21/07/2015	NA	2	Yes	10	Not ambiguous	Not ambiguous	4796	Pos	TRUE	B	Mobile	FALSE	0	0	0	0	1	1	0	0	Neg	Neg	Neg	Neg	Pos
B024	UM/KWAMOUTH	No	Pos	Neg	NA	NA	NA	Neg	Neg	Pos	Pos	2+	2+	0	0	Pos	Pos	0	0	2+	2+	NA	0	21/07/2015	NA	3	Yes	3	Not ambiguous	Not ambiguous	4798	Pos	TRUE	B	Mobile	FALSE	1	1	0	0	0	0	1	1	Pos	Pos	Neg	Neg	Neg
B1387	KWAMOUTH	No	Neg	NA	Neg	Neg	NA	Neg	Neg	Neg	Neg	0	0	0	0	Pos	Pos	0	0	1+	1+	NA	0	21/07/2015	NA	NA	Yes	26	Not ambiguous	Not ambiguous	4801	Neg	FALSE	B	Mobile	FALSE	0	0	0	0	0	0	1	1	Neg	Neg	Neg	Neg	Neg
B1321	KWAMOUTH	No	Neg	NA	Neg	Neg	NA	Neg	Neg	Pos	Pos	2+	2+	1+	1+	Neg	Neg	0	0	0	0	NA	0	21/07/2015	NA	NA	Yes	5	Not ambiguous	Not ambiguous	4804	Neg	FALSE	B	Mobile	FALSE	1	1	1	1	0	0	0	0	Pos	Pos	Pos	Pos	Neg
B144	KWAMOUTH	No	Pos	Neg	NA	NA	NA	Neg	Neg	Pos	Pos	1+	1+	2+	2+	Neg	Neg	0	0	0	0	NA	0	21/07/2015	99	3	Yes	4	Not ambiguous	Not ambiguous	4807	Pos	TRUE	B	Mobile	FALSE	1	1	1	1	0	0	0	0	Pos	Pos	Pos	Pos	Neg
B1287	KWAMOUTH	No	Neg	NA	Neg	Neg	NA	Neg	Neg	Pos	Pos	1+	1+	0	0	Neg	Neg	0	0	0	0	NA	0	21/07/2015	99	NA	Yes	7	Not ambiguous	Not ambiguous	4809	Neg	FALSE	B	Mobile	FALSE	1	1	0	0	0	0	0	0	Pos	Pos	Neg	Neg	Neg
B1247	KWAMOUTH	No	Neg	NA	Neg	Neg	NA	Neg	Neg	Pos	Pos	0	0	1+	1+	Neg	Neg	0	0	0	0	NA	0	21/07/2015	NA	NA	Yes	13	Not ambiguous	Not ambiguous	4813	Neg	FALSE	B	Mobile	FALSE	0	0	1	1	0	0	0	0	Neg	Neg	Pos	Pos	Neg
B1200	KWAMOUTH	No	Neg	NA	Neg	Neg	NA	Neg	Neg	Pos	Pos	0	0	1+	1+	Neg	Neg	0	0	0	0	NA	0	21/07/2015	NA	NA	Yes	15	Not ambiguous	Not ambiguous	4822	Neg	FALSE	B	Mobile	FALSE	0	0	1	1	0	0	0	0	Neg	Neg	Pos	Pos	Neg
B1171	KWAMOUTH	No	Neg	NA	Neg	Neg	NA	Neg	Neg	Neg	Neg	0	0	0	0	Pos	Pos	1+	1+	1+	1+	NA	0	21/07/2015	NA	NA	Yes	51	Not ambiguous	Not ambiguous	4825	Neg	FALSE	B	Mobile	FALSE	0	0	0	0	1	1	1	1	Neg	Neg	Neg	Neg	Pos
B1117	KWAMOUTH	No	Neg	NA	Neg	Neg	NA	Neg	Neg	Pos	Pos	2+	2+	1+	1+	Neg	Neg	0	0	0	0	NA	0	21/07/2015	NA	NA	Yes	7	Not ambiguous	Not ambiguous	4827	Neg	FALSE	B	Mobile	FALSE	1	1	1	1	0	0	0	0	Pos	Pos	Pos	Pos	Neg
B1112	KWAMOUTH	No	Neg	NA	Neg	Neg	NA	Neg	Neg	Pos	Pos	1+	1+	1+	1+	Neg	Neg	0	0	0	0	NA	0	21/07/2015	99	NA	Yes	2	Not ambiguous	Not ambiguous	4829	Neg	FALSE	B	Mobile	FALSE	1	1	1	1	0	0	0	0	Pos	Pos	Pos	Pos	Neg
B1103	KWAMOUTH	No	Neg	NA	Neg	Neg	NA	Neg	Neg	Pos	Pos	2+	2+	1+	0	Neg	Neg	0	0	0	0	NA	0	21/07/2015	NA	NA	Yes	8	Not ambiguous	Not ambiguous	4832	Neg	FALSE	B	Mobile	FALSE	1	1	1	0	0	0	0	0	Pos	Pos	Pos	Neg	Neg
B1054	KWAMOUTH	No	Neg	NA	Neg	Neg	NA	Neg	Neg	Pos	Pos	0	0	1+	1+	Neg	Neg	0	0	0	0	NA	0	21/07/2015	NA	NA	Yes	6	Not ambiguous	Not ambiguous	4835	Neg	FALSE	B	Mobile	FALSE	0	0	1	1	0	0	0	0	Neg	Neg	Pos	Pos	Neg
B1015	KWAMOUTH	No	Neg	NA	Neg	Neg	NA	Neg	Neg	Pos	Pos	0	0	2+	1+	Neg	Neg	0	0	0	0	NA	0	21/07/2015	NA	NA	Yes	3	Not ambiguous	Not ambiguous	4838	Neg	FALSE	B	Mobile	FALSE	0	0	1	1	0	0	0	0	Neg	Neg	Pos	Pos	Neg
B1014	KWAMOUTH	No	Neg	NA	Neg	Neg	NA	Neg	Neg	Pos	Pos	1+	1+	1+	1+	Neg	Neg	0	0	0	0	NA	0	21/07/2015	99	NA	Yes	47	Not ambiguous	Not ambiguous	4841	Neg	FALSE	B	Mobile	FALSE	1	1	1	1	0	0	0	0	Pos	Pos	Pos	Pos	Neg
B1000	KWAMOUTH	No	Neg	NA	Neg	Neg	NA	Neg	Neg	Pos	Pos	1+	1+	0	0	Neg	Neg	0	0	0	0	NA	0	21/07/2015	99	NA	Yes	3	Not ambiguous	Not ambiguous	4844	Neg	FALSE	B	Mobile	FALSE	1	1	0	0	0	0	0	0	Pos	Pos	Neg	Neg	Neg
B981	KWAMOUTH	No	Neg	NA	Neg	Neg	NA	Neg	Neg	Pos	Pos	1+	1+	1+	1+	Neg	Neg	0	0	0	0	NA	0	21/07/2015	99	NA	Yes	35	Not ambiguous	Not ambiguous	4848	Neg	FALSE	B	Mobile	FALSE	1	1	1	1	0	0	0	0	Pos	Pos	Pos	Pos	Neg
B935	KWAMOUTH	No	Neg	NA	Neg	Neg	NA	Neg	Neg	Pos	Pos	1+	1+	1+	1+	Neg	Neg	0	0	0	0	NA	0	21/07/2015	99	NA	Yes	2	Not ambiguous	Not ambiguous	4851	Neg	FALSE	B	Mobile	FALSE	1	1	1	1	0	0	0	0	Pos	Pos	Pos	Pos	Neg
B901	KWAMOUTH	No	Neg	NA	Neg	Neg	NA	Neg	Neg	Neg	Neg	0	0	0	0	Pos	Pos	0	0	2+	2+	NA	0	21/07/2015	NA	NA	Yes	18	Not ambiguous	Not ambiguous	4855	Neg	FALSE	B	Mobile	FALSE	0	0	0	0	0	0	1	1	Neg	Neg	Neg	Neg	Neg
B528	UM/KWAMOUTH	No	Neg	NA	Neg	Neg	NA	Neg	Neg	Pos	Pos	1+	2+	1+	2+	Neg	Neg	0	0	0	0	NA	0	21/07/2015	99	NA	Yes	9	Not ambiguous	Not ambiguous	4859	Neg	FALSE	B	Mobile	FALSE	1	1	1	1	0	0	0	0	Pos	Pos	Pos	Pos	Neg
B475	KWAMOUTH	No	Neg	NA	Neg	Neg	NA	Neg	Neg	Pos	Pos	1+	1+	0	0	Neg	Neg	0	0	0	0	NA	0	21/07/2015	99	NA	Yes	13	Not ambiguous	Not ambiguous	4863	Neg	FALSE	B	Mobile	FALSE	1	1	0	0	0	0	0	0	Pos	Pos	Neg	Neg	Neg
B436	KWAMOUTH	No	Neg	NA	Neg	Neg	NA	Neg	Neg	Pos	Pos	0	1+	1+	1+	Neg	Neg	0	0	0	0	NA	0	21/07/2015	NA	NA	Yes	66	Not ambiguous	Not ambiguous	4865	Neg	FALSE	B	Mobile	FALSE	0	1	1	1	0	0	0	0	Neg	Pos	Pos	Pos	Neg
B462	KWAMOUTH	No	Neg	NA	Neg	Neg	NA	Neg	Neg	Pos	Pos	1+	1+	1+	1+	Neg	Neg	0	0	0	0	NA	0	21/07/2015	99	NA	Yes	43	Not ambiguous	Not ambiguous	4867	Neg	FALSE	B	Mobile	FALSE	1	1	1	1	0	0	0	0	Pos	Pos	Pos	Pos	Neg
B366	KWAMOUTH	No	Neg	NA	Neg	Neg	NA	Neg	Neg	Pos	Pos	1+	1+	0	0	Neg	Neg	0	0	0	0	NA	0	21/07/2015	99	NA	Yes	48	Not ambiguous	Not ambiguous	4869	Neg	FALSE	B	Mobile	FALSE	1	1	0	0	0	0	0	0	Pos	Pos	Neg	Neg	Neg
B348	KWAMOUTH	No	Neg	NA	Neg	Neg	NA	Neg	Neg	Pos	Pos	1+	1+	1+	1+	Neg	Neg	0	0	0	0	NA	0	21/07/2015	99	NA	Yes	22	Not ambiguous	Not ambiguous	4871	Neg	FALSE	B	Mobile	FALSE	1	1	1	1	0	0	0	0	Pos	Pos	Pos	Pos	Neg
B344	UM/KWAMOUTH	No	Neg	NA	Neg	Neg	NA	Neg	Neg	Pos	Pos	1+	0	1+	1+	Neg	Neg	0	0	0	0	NA	0	21/07/2015	99	NA	Yes	4	Not ambiguous	Not ambiguous	4873	Neg	FALSE	B	Mobile	FALSE	1	0	1	1	0	0	0	0	Pos	Neg	Pos	Pos	Neg
B343	UM/KWAMOUTH	No	Neg	NA	Neg	Neg	NA	Neg	Neg	Pos	Pos	2+	1+	2+	2+	Neg	Neg	0	0	0	0	NA	0	21/07/2015	NA	NA	Yes	9	Not ambiguous	Not ambiguous	4876	Neg	FALSE	B	Mobile	FALSE	1	1	1	1	0	0	0	0	Pos	Pos	Pos	Pos	Neg
B309	KWAMOUTH	No	Neg	NA	Neg	Neg	NA	Pos	Pos	Pos	Pos	2+	2+	1+	1+	Neg	Neg	0	0	0	0	NA	0	21/07/2015	NA	NA	Yes	7	Not ambiguous	Not ambiguous	4879	Neg	FALSE	B	Mobile	FALSE	1	1	1	1	0	0	0	0	Pos	Pos	Pos	Pos	Neg
B301	KWAMOUTH	No	Neg	NA	Neg	Neg	NA	Neg	Neg	Pos	Pos	1+	0	1+	1+	Neg	Neg	0	0	0	0	NA	0	21/07/2015	99	NA	Yes	11	Not ambiguous	Not ambiguous	4882	Neg	FALSE	B	Mobile	FALSE	1	0	1	1	0	0	0	0	Pos	Neg	Pos	Pos	Neg
B120	UM/ KWAMOUTH	No	Neg	NA	Neg	Neg	NA	Neg	Neg	Neg	Neg	0	0	0	0	Pos	Pos	0	0	2+	1+	NA	0	21/07/2015	NA	NA	Yes	28	Not ambiguous	Not ambiguous	4884	Neg	FALSE	B	Mobile	FALSE	0	0	0	0	0	0	1	1	Neg	Neg	Neg	Neg	Neg
B226	UM/ KWAMOUTH	No	Neg	NA	Neg	Neg	NA	Neg	Neg	Pos	Pos	1+	1+	0	0	Neg	Neg	0	0	0	0	NA	0	21/07/2015	1	NA	Yes	8	Not ambiguous	Not ambiguous	4893	Neg	FALSE	B	Mobile	FALSE	1	1	0	0	0	0	0	0	Pos	Pos	Neg	Neg	Neg
L498	HS NKARA	No	Pos	Neg	Neg	Pos	Neg	Neg	Neg	Neg	Neg	0	0	0	0	Pos	Pos	0	0	1+	1+	NA	0	21/08/2015	NA	3	Yes	4	Not ambiguous	Not ambiguous	4912	Pos	TRUE	L	Fixed	FALSE	0	0	0	0	0	0	1	1	Neg	Neg	Neg	Neg	Neg
L516	HS/NKARA	No	Neg	Neg	Pos	Pos	NA	Neg	Neg	Neg	Neg	0	0	0	0	Pos	Pos	1+	1+	0	0	NA	0	25/08/2015	NA	3	Yes	13	Not ambiguous	Not ambiguous	4914	Pos	TRUE	L	Fixed	FALSE	0	0	0	0	1	1	0	0	Neg	Neg	Neg	Neg	Pos
L545	HS NKARA	No	Pos	Neg	Neg	Neg	NA	Neg	Neg	Neg	Neg	0	0	0	0	Pos	Pos	1+	1+	0	0	NA	0	27/08/2015	NA	1	Yes	27	Not ambiguous	Not ambiguous	4916	Pos	TRUE	L	Fixed	FALSE	0	0	0	0	1	1	0	0	Neg	Neg	Neg	Neg	Pos
L650	HS NKARA	Yes	Neg	Pos	Pos	Pos	NA	Neg	Neg	Neg	Neg	0	0	0	0	Pos	Pos	1+	1+	1+	1+	NA	0	05/09/2015	NA	425	Yes	23	Not ambiguous	Not ambiguous	4918	Pos	TRUE	L	Fixed	FALSE	0	0	0	0	1	1	1	1	Neg	Neg	Neg	Neg	Pos
L635	HS NKARA	Yes	Pos	Neg	Neg	Neg	NA	Neg	Neg	Neg	Neg	0	0	0	0	Pos	Pos	0	0	1+	1+	NA	0	04/09/2015	NA	2	Yes	6	Not ambiguous	Not ambiguous	4920	Pos	TRUE	L	Fixed	FALSE	0	0	0	0	0	0	1	1	Neg	Neg	Neg	Neg	Neg
L584	HS/NKARA	No	Pos	Neg	Pos	Pos	NA	Neg	Neg	Pos	Pos	2+	2+	2+	2+	Pos	Pos	1+	1+	0	0	NA	0	01/09/2015	NA	1	Yes	3	Not ambiguous	Not ambiguous	4922	Pos	TRUE	L	Fixed	FALSE	1	1	1	1	1	1	0	0	Pos	Pos	Pos	Pos	Pos
L538	HS/NKARA	No	Neg	Neg	Neg	Pos	NA	Neg	Neg	Pos	Pos	2+	2+	2+	2+	Neg	Neg	0	0	0	0	NA	0	27/08/2015	NA	1	Yes	43	Not ambiguous	Not ambiguous	4924	Pos	TRUE	L	Fixed	FALSE	1	1	1	1	0	0	0	0	Pos	Pos	Pos	Pos	Neg
L494	HS NKARA	No	Neg	Neg	Pos	Pos	NA	Neg	Neg	Neg	Neg	0	0	0	0	Pos	Pos	0	0	2+	2+	NA	0	20/08/2015	NA	3	Yes	3	Not ambiguous	Not ambiguous	4926	Pos	TRUE	L	Fixed	FALSE	0	0	0	0	0	0	1	1	Neg	Neg	Neg	Neg	Neg
L469	HS NKARA	No	Neg	NA	Neg	Neg	NA	Neg	Neg	Neg	Neg	0	0	0	0	Pos	Pos	1+	1+	0	0	NA	0	15/08/2015	NA	NA	Yes	15	Not ambiguous	Not ambiguous	4928	Neg	FALSE	L	Fixed	FALSE	0	0	0	0	1	1	0	0	Neg	Neg	Neg	Neg	Pos
L471	HS NKARA	No	Neg	NA	Neg	Neg	NA	Neg	Neg	Pos	Pos	1+	1+	0	0	Pos	Pos	0	0	1+	1+	NA	0	15/08/2015	1	NA	Yes	29	Not ambiguous	Not ambiguous	4930	Neg	FALSE	L	Fixed	FALSE	1	1	0	0	0	0	1	1	Pos	Pos	Neg	Neg	Neg
L503	HS NKARA	No	Neg	NA	Neg	Neg	NA	Neg	Neg	Neg	Neg	0	0	0	0	Pos	Pos	0	0	2+	2+	NA	0	24/08/2015	NA	NA	Yes	22	Not ambiguous	Not ambiguous	4932	Neg	FALSE	L	Fixed	FALSE	0	0	0	0	0	0	1	1	Neg	Neg	Neg	Neg	Neg
L506	HS NKARA	No	Neg	NA	Neg	Neg	NA	Neg	Neg	Neg	Neg	0	0	0	0	Pos	Pos	0	0	2+	2+	NA	0	24/08/2015	NA	NA	Yes	4	Not ambiguous	Not ambiguous	4934	Neg	FALSE	L	Fixed	FALSE	0	0	0	0	0	0	1	1	Neg	Neg	Neg	Neg	Neg
L512	HS NKARA	No	Neg	NA	Neg	Neg	NA	Neg	Neg	Pos	Pos	2+	2+	2+	2+	Pos	Pos	0	0	2+	2+	NA	0	24/08/2015	NA	NA	Yes	3	Not ambiguous	Not ambiguous	4936	Neg	FALSE	L	Fixed	FALSE	1	1	1	1	0	0	1	1	Pos	Pos	Pos	Pos	Neg
L515	HS NKARA	No	Neg	NA	Neg	Neg	NA	Neg	Neg	Neg	Neg	0	0	0	0	Pos	Pos	2+	2+	2+	2+	NA	0	25/08/2015	NA	NA	Yes	2	Not ambiguous	Not ambiguous	4938	Neg	FALSE	L	Fixed	FALSE	0	0	0	0	1	1	1	1	Neg	Neg	Neg	Neg	Pos
L524	HS NKARA	No	Neg	NA	Neg	Neg	NA	Neg	Neg	Neg	Neg	0	0	0	0	Pos	Pos	1+	1+	2+	2+	NA	0	26/08/2015	NA	NA	Yes	4	Not ambiguous	Not ambiguous	4945	Neg	FALSE	L	Fixed	FALSE	0	0	0	0	1	1	1	1	Neg	Neg	Neg	Neg	Pos
L546	HS NKARA	No	Neg	NA	Neg	Neg	NA	Neg	Neg	Neg	Neg	0	0	0	0	Pos	Pos	0	0	1+	1+	NA	0	27/08/2015	NA	NA	Yes	55	Not ambiguous	Not ambiguous	4947	Neg	FALSE	L	Fixed	FALSE	0	0	0	0	0	0	1	1	Neg	Neg	Neg	Neg	Neg
L548	HS NKARA	No	Neg	NA	Neg	Neg	Neg	Neg	Neg	Neg	Neg	0	0	0	0	Pos	Pos	0	0	2+	2+	NA	0	27/08/2015	NA	NA	Yes	28	Not ambiguous	Not ambiguous	4950	Neg	FALSE	L	Fixed	FALSE	0	0	0	0	0	0	1	1	Neg	Neg	Neg	Neg	Neg
L477	HS NKARA	No	Neg	NA	Neg	Neg	Neg	Neg	Neg	Neg	Neg	0	0	0	0	Pos	Pos	0	0	1+	1+	NA	0	19/08/2015	NA	NA	Yes	26	Not ambiguous	Not ambiguous	4952	Neg	FALSE	L	Fixed	FALSE	0	0	0	0	0	0	1	1	Neg	Neg	Neg	Neg	Neg
L522	HS NKARA	No	Neg	NA	Neg	Neg	NA	Neg	Neg	Pos	Pos	2+	2+	0	0	Neg	Neg	0	0	0	0	NA	0	26/08/2015	14	NA	Yes	31	Not ambiguous	Not ambiguous	4955	Neg	FALSE	L	Fixed	FALSE	1	1	0	0	0	0	0	0	Pos	Pos	Neg	Neg	Neg
L558	HS NKARA	No	Neg	NA	Neg	Neg	NA	Neg	Neg	Pos	Pos	1+	1+	0	0	Neg	Neg	0	0	0	0	NA	0	29/08/2015	5	NA	Yes	8	Not ambiguous	Not ambiguous	4957	Neg	FALSE	L	Fixed	FALSE	1	1	0	0	0	0	0	0	Pos	Pos	Neg	Neg	Neg
L559	HS NKARA	No	Neg	NA	Neg	Neg	NA	Neg	Neg	Neg	Neg	0	0	0	0	Pos	Pos	0	0	2+	2+	NA	0	29/08/2015	NA	NA	Yes	51	Not ambiguous	Not ambiguous	4960	Neg	FALSE	L	Fixed	FALSE	0	0	0	0	0	0	1	1	Neg	Neg	Neg	Neg	Neg
L563	HS NKARA	No	Neg	NA	Neg	Neg	NA	Neg	Neg	Neg	Neg	0	0	0	0	Pos	Pos	1+	1+	1+	1+	NA	0	31/08/2015	NA	NA	Yes	58	Not ambiguous	Not ambiguous	4963	Neg	FALSE	L	Fixed	FALSE	0	0	0	0	1	1	1	1	Neg	Neg	Neg	Neg	Pos
L568	HS NKARA	No	Neg	NA	Neg	Neg	NA	Neg	Neg	Pos	Pos	2+	2+	1+	1+	Neg	Neg	0	0	0	0	NA	0	31/08/2015	NA	NA	Yes	22	Not ambiguous	Not ambiguous	4966	Neg	FALSE	L	Fixed	FALSE	1	1	1	1	0	0	0	0	Pos	Pos	Pos	Pos	Neg
L574	HS NKARA	No	Neg	NA	Neg	Neg	NA	Neg	Neg	Pos	Pos	1+	1+	0	0	Neg	Neg	0	0	0	0	NA	0	31/08/2015	2	NA	Yes	30	Not ambiguous	Not ambiguous	4968	Neg	FALSE	L	Fixed	FALSE	1	1	0	0	0	0	0	0	Pos	Pos	Neg	Neg	Neg
L582	HS NKARA	No	Neg	NA	Neg	Neg	NA	Neg	Neg	Neg	Neg	0	0	0	0	Pos	Pos	2+	2+	0	0	NA	0	01/09/2015	NA	NA	Yes	32	Not ambiguous	Not ambiguous	4970	Neg	FALSE	L	Fixed	FALSE	0	0	0	0	1	1	0	0	Neg	Neg	Neg	Neg	Pos
L583	HS NKARA	No	Neg	NA	Neg	Neg	NA	Neg	Neg	Neg	Neg	0	0	0	0	Pos	Pos	2+	2+	0	0	NA	0	01/09/2015	NA	NA	Yes	42	Not ambiguous	Not ambiguous	4972	Neg	FALSE	L	Fixed	FALSE	0	0	0	0	1	1	0	0	Neg	Neg	Neg	Neg	Pos
L585	HS NKARA	No	Neg	NA	Neg	Neg	NA	Neg	Neg	Pos	Pos	2+	2+	0	0	Pos	Pos	0	0	2+	2+	NA	0	01/09/2015	NA	NA	Yes	35	Not ambiguous	Not ambiguous	4974	Neg	FALSE	L	Fixed	FALSE	1	1	0	0	0	0	1	1	Pos	Pos	Neg	Neg	Neg
L586	HS NKARA	No	Neg	NA	Neg	Neg	NA	Neg	Neg	Neg	Neg	0	0	0	0	Pos	Pos	1+	1+	0	0	NA	0	01/09/2015	NA	NA	Yes	38	Not ambiguous	Not ambiguous	4976	Neg	FALSE	L	Fixed	FALSE	0	0	0	0	1	1	0	0	Neg	Neg	Neg	Neg	Pos
L594	HS/NKARA	No	Neg	NA	Neg	Neg	NA	Neg	Neg	Neg	Neg	0	0	0	0	Pos	Pos	0	0	1+	1+	NA	0	01/09/2015	NA	NA	Yes	41	Not ambiguous	Not ambiguous	4978	Neg	FALSE	L	Fixed	FALSE	0	0	0	0	0	0	1	1	Neg	Neg	Neg	Neg	Neg
L599	HS/NKARA	No	Neg	NA	Neg	Neg	NA	Neg	Neg	Pos	Pos	1+	1+	0	0	Neg	Neg	0	0	0	0	NA	0	01/09/2015	5	NA	Yes	15	Not ambiguous	Not ambiguous	4980	Neg	FALSE	L	Fixed	FALSE	1	1	0	0	0	0	0	0	Pos	Pos	Neg	Neg	Neg
L657	HS/NKARA	No	Neg	NA	Neg	Neg	NA	Neg	Neg	Neg	Neg	0	0	0	0	Pos	Pos	0	0	1+	1+	NA	0	05/09/2015	NA	NA	Yes	30	Not ambiguous	Not ambiguous	4984	Neg	FALSE	L	Fixed	FALSE	0	0	0	0	0	0	1	1	Neg	Neg	Neg	Neg	Neg
L860	HS/NKARA	No	Neg	NA	Neg	Neg	NA	Neg	Neg	Neg	Neg	0	0	0	0	Pos	Pos	1+	1+	3+	3+	NA	0	25/09/2015	NA	NA	Yes	55	Not ambiguous	Not ambiguous	4986	Neg	FALSE	L	Fixed	FALSE	0	0	0	0	1	1	1	1	Neg	Neg	Neg	Neg	Pos
L636	HS/NKARA	No	Neg	NA	Neg	Neg	NA	Neg	Neg	Pos	Pos	1+	1+	1+	1+	Pos	Pos	2+	2+	0	1+	NA	0	04/09/2015	2	NA	Yes	25	Not ambiguous	Not ambiguous	4988	Neg	FALSE	L	Fixed	FALSE	1	1	1	1	1	1	0	1	Pos	Pos	Pos	Pos	Pos
F525	HGR/KWAMOUTH	No	Neg	NA	Neg	Neg	NA	Neg	Neg	Neg	Neg	0	0	0	0	Pos	Pos	0	0	1+	1+	NA	0	02/09/2015	NA	NA	Yes	7	Not ambiguous	Not ambiguous	5034	Neg	FALSE	F	Fixed	FALSE	0	0	0	0	0	0	1	1	Neg	Neg	Neg	Neg	Neg
F548	HGR/KWAMOUTH	No	Neg	NA	Neg	Neg	NA	Neg	Neg	Neg	Neg	0	0	0	0	Pos	Pos	1+	1+	0	0	NA	0	04/09/2015	NA	NA	Yes	24	Not ambiguous	Not ambiguous	5036	Neg	FALSE	F	Fixed	FALSE	0	0	0	0	1	1	0	0	Neg	Neg	Neg	Neg	Pos
F581	HGR/KWAMOUTH	No	Neg	NA	Neg	Neg	NA	Pos	Pos	Neg	Neg	0	0	0	0	Neg	Neg	0	0	0	0	NA	0	08/09/2015	NA	NA	Yes	21	Not ambiguous	Not ambiguous	5038	Neg	FALSE	F	Fixed	FALSE	0	0	0	0	0	0	0	0	Neg	Neg	Neg	Neg	Neg
F594	HGR/KWAMOUTH	No	Neg	NA	Neg	Neg	NA	Neg	Neg	Neg	Neg	0	0	0	0	Pos	Pos	1+	1+	0	0	NA	0	09/09/2015	NA	NA	Yes	40	Not ambiguous	Not ambiguous	5040	Neg	FALSE	F	Fixed	FALSE	0	0	0	0	1	1	0	0	Neg	Neg	Neg	Neg	Pos
F602	HGR/KWAMOUTH	No	Neg	NA	Neg	Neg	NA	Neg	Neg	Neg	Neg	0	0	0	0	Pos	Pos	0	0	1+	1+	NA	0	09/09/2015	NA	NA	Yes	6	Not ambiguous	Not ambiguous	5042	Neg	FALSE	F	Fixed	FALSE	0	0	0	0	0	0	1	1	Neg	Neg	Neg	Neg	Neg
F603	HGR/KWAMOUTH	No	Neg	NA	Neg	Neg	NA	Neg	Neg	Neg	Neg	0	0	0	0	Pos	Pos	0	0	1+	1+	NA	0	09/09/2015	NA	NA	Yes	36	Not ambiguous	Not ambiguous	5044	Neg	FALSE	F	Fixed	FALSE	0	0	0	0	0	0	1	1	Neg	Neg	Neg	Neg	Neg
F632	HGR/KWAMOUTH	No	Neg	NA	Neg	Neg	NA	Neg	Neg	Neg	Neg	0	0	0	0	Pos	Pos	0	0	1+	1+	NA	0	11/09/2015	NA	NA	Yes	1	Not ambiguous	Not ambiguous	5046	Neg	FALSE	F	Fixed	FALSE	0	0	0	0	0	0	1	1	Neg	Neg	Neg	Neg	Neg
F642	HGR/KWAMOUTH	No	Neg	NA	Neg	Neg	NA	Neg	Neg	Neg	Neg	0	0	0	0	Pos	Pos	1+	1+	0	0	NA	0	12/09/2015	NA	NA	Yes	1	Not ambiguous	Not ambiguous	5048	Neg	FALSE	F	Fixed	FALSE	0	0	0	0	1	1	0	0	Neg	Neg	Neg	Neg	Pos
F657	HGR/KWAMOUTH	No	Neg	NA	Neg	Neg	NA	Neg	Neg	Neg	Neg	0	0	0	0	Pos	Pos	0	0	1+	1+	NA	0	14/09/2015	NA	NA	Yes	25	Not ambiguous	Not ambiguous	5050	Neg	FALSE	F	Fixed	FALSE	0	0	0	0	0	0	1	1	Neg	Neg	Neg	Neg	Neg
F662	HGR/KWAMOUTH	No	Neg	NA	Neg	Neg	NA	Neg	Neg	Neg	Neg	0	0	0	0	Pos	Pos	1+	1+	0	0	NA	0	14/09/2015	NA	NA	Yes	11	Not ambiguous	Not ambiguous	5052	Neg	FALSE	F	Fixed	FALSE	0	0	0	0	1	1	0	0	Neg	Neg	Neg	Neg	Pos
F667	HGR/KWAMOUTH	No	Neg	NA	Neg	Neg	NA	Neg	Neg	Neg	Neg	0	0	0	0	Pos	Pos	1+	1+	0	0	NA	0	15/09/2015	NA	NA	Yes	22	Not ambiguous	Not ambiguous	5055	Neg	FALSE	F	Fixed	FALSE	0	0	0	0	1	1	0	0	Neg	Neg	Neg	Neg	Pos
F676	HGR/KWAMOUTH	No	Neg	NA	Neg	Neg	NA	Neg	Neg	Neg	Neg	0	0	0	0	Pos	Pos	1+	1+	0	0	NA	0	15/09/2015	NA	NA	Yes	34	Not ambiguous	Not ambiguous	5057	Neg	FALSE	F	Fixed	FALSE	0	0	0	0	1	1	0	0	Neg	Neg	Neg	Neg	Pos
F683	HGR/KWAMOUTH	No	Neg	NA	Neg	Neg	NA	Neg	Neg	Pos	Pos	0	0	1+	1+	Neg	Neg	0	0	0	0	NA	0	16/09/2015	NA	NA	Yes	1	Not ambiguous	Not ambiguous	5060	Neg	FALSE	F	Fixed	FALSE	0	0	1	1	0	0	0	0	Neg	Neg	Pos	Pos	Neg
F692	HGR/KWAMOUTH	No	Neg	NA	Neg	Neg	NA	Neg	Neg	Pos	Pos	0	0	1+	1+	Pos	Pos	0	0	1+	1+	NA	0	16/09/2015	NA	NA	Yes	17	Not ambiguous	Not ambiguous	5063	Neg	FALSE	F	Fixed	FALSE	0	0	1	1	0	0	1	1	Neg	Neg	Pos	Pos	Neg
F694	HGR/KWAMOUTH	No	Neg	NA	Neg	Neg	NA	Neg	Neg	Neg	Neg	0	0	0	0	Pos	Pos	1+	1+	0	0	NA	0	17/09/2015	NA	NA	Yes	22	Not ambiguous	Not ambiguous	5066	Neg	FALSE	F	Fixed	FALSE	0	0	0	0	1	1	0	0	Neg	Neg	Neg	Neg	Pos
F701	HGR/KWAMOUTH	No	Neg	NA	Neg	Neg	NA	Neg	Neg	Neg	Neg	0	0	0	0	Pos	Pos	0	0	1+	1+	NA	0	17/09/2015	NA	NA	Yes	3	Not ambiguous	Not ambiguous	5069	Neg	FALSE	F	Fixed	FALSE	0	0	0	0	0	0	1	1	Neg	Neg	Neg	Neg	Neg
F710	HGR/KWAMOUTH	No	Neg	NA	Neg	Neg	NA	Neg	Neg	Neg	Neg	0	0	0	0	Pos	Pos	1+	1+	1+	1+	NA	0	18/09/2015	NA	NA	Yes	23	Not ambiguous	Not ambiguous	5072	Neg	FALSE	F	Fixed	FALSE	0	0	0	0	1	1	1	1	Neg	Neg	Neg	Neg	Pos
F718	HGR/KWAMOUTH	No	Neg	NA	Neg	Neg	NA	Neg	Neg	Neg	Neg	0	0	0	0	Pos	Pos	1+	1+	0	0	NA	0	19/09/2015	NA	NA	Yes	1	Not ambiguous	Not ambiguous	5074	Neg	FALSE	F	Fixed	FALSE	0	0	0	0	1	1	0	0	Neg	Neg	Neg	Neg	Pos
F720	HGR/KWAMOUTH	No	Neg	NA	Neg	Neg	NA	Neg	Neg	Neg	Neg	0	0	0	0	Pos	Pos	0	0	1+	1+	NA	0	19/09/2015	NA	NA	Yes	40	Not ambiguous	Not ambiguous	5077	Neg	FALSE	F	Fixed	FALSE	0	0	0	0	0	0	1	1	Neg	Neg	Neg	Neg	Neg
N1004	MASAMUNA	No	Neg	NA	Neg	Neg	NA	Neg	Neg	Neg	Neg	0	0	0	0	Neg	Neg	0	0	0	0	NA	0	05/10/2015	NA	NA	Yes	14	Not ambiguous	Not ambiguous	5093	Neg	FALSE	N	Fixed	FALSE	0	0	0	0	0	0	0	0	Neg	Neg	Neg	Neg	Neg
N1008	MASAMUNA	No	Neg	NA	Neg	Neg	NA	Neg	Neg	Neg	Neg	0	0	0	0	Pos	Pos	0	0	2+	2+	NA	0	05/10/2015	NA	NA	Yes	63	Not ambiguous	Not ambiguous	5095	Neg	FALSE	N	Fixed	FALSE	0	0	0	0	0	0	1	1	Neg	Neg	Neg	Neg	Neg
N1010	MASAMUNA	No	Neg	NA	Neg	Neg	NA	Neg	Neg	Neg	Neg	0	0	0	0	Pos	Pos	1+	1+	2+	2+	NA	0	05/10/2015	NA	NA	Yes	43	Not ambiguous	Not ambiguous	5097	Neg	FALSE	N	Fixed	FALSE	0	0	0	0	1	1	1	1	Neg	Neg	Neg	Neg	Pos
M911	HS DE KITOY	No	Neg	Pos	Pos	Pos	Neg	Pos	Pos	Neg	Neg	0	0	0	0	Pos	Pos	1+	0	1+	1+	NA	0	23/09/2015	NA	4	Yes	0	Not ambiguous	Not ambiguous	5101	Pos	TRUE	M	Fixed	FALSE	0	0	0	0	1	0	1	1	Neg	Neg	Neg	Neg	Pos
M524	HS DE KITOY	No	Neg	NA	Neg	Neg	NA	Neg	Neg	Pos	Pos	1+	1+	0	0	Pos	Pos	1+	1+	1+	1+	NA	0	11/08/2015	25	NA	Yes	21	Not ambiguous	Not ambiguous	5103	Neg	FALSE	M	Fixed	FALSE	1	1	0	0	1	1	1	1	Pos	Pos	Neg	Neg	Pos
M527	HS DE KITOY	No	Neg	NA	Neg	Neg	NA	Neg	Neg	Neg	Neg	0	0	0	0	Pos	Pos	3+	3+	0	0	NA	0	11/08/2015	NA	NA	Yes	48	Not ambiguous	Not ambiguous	5105	Neg	FALSE	M	Fixed	FALSE	0	0	0	0	1	1	0	0	Neg	Neg	Neg	Neg	Pos
M530	HS DE KITOY	No	Neg	NA	Neg	Neg	NA	Pos	Pos	Neg	Neg	0	0	0	0	Pos	Pos	1+	1+	0	0	NA	0	11/08/2015	NA	NA	Yes	43	Not ambiguous	Not ambiguous	5107	Neg	FALSE	M	Fixed	FALSE	0	0	0	0	1	1	0	0	Neg	Neg	Neg	Neg	Pos
M532	HS DE KITOY	No	Neg	NA	Neg	Neg	NA	Neg	Neg	Neg	Neg	0	0	0	0	Pos	Pos	0	0	1+	1+	NA	0	11/08/2015	NA	NA	Yes	28	Not ambiguous	Not ambiguous	5109	Neg	FALSE	M	Fixed	FALSE	0	0	0	0	0	0	1	1	Neg	Neg	Neg	Neg	Neg
M542	HS DE KITOY	No	Neg	NA	Neg	Neg	NA	Neg	Neg	Neg	Neg	0	0	0	0	Pos	Pos	0	0	2+	2+	NA	0	11/08/2015	NA	NA	Yes	11	Not ambiguous	Not ambiguous	5111	Neg	FALSE	M	Fixed	FALSE	0	0	0	0	0	0	1	1	Neg	Neg	Neg	Neg	Neg
M556	HS DE KITOY	No	Neg	NA	Neg	Neg	NA	Neg	Neg	Neg	Neg	0	0	0	0	Pos	Pos	0	0	1+	1+	NA	0	12/08/2015	NA	NA	Yes	50	Not ambiguous	Not ambiguous	5113	Neg	FALSE	M	Fixed	FALSE	0	0	0	0	0	0	1	1	Neg	Neg	Neg	Neg	Neg
M587	HS DE KITOY	No	Neg	NA	Neg	Neg	NA	Pos	Pos	Pos	Pos	3+	3+	1+	1+	Neg	Neg	0	0	0	0	NA	0	15/08/2015	NA	NA	Yes	30	Not ambiguous	Not ambiguous	5115	Neg	FALSE	M	Fixed	FALSE	1	1	1	1	0	0	0	0	Pos	Pos	Pos	Pos	Neg
M592	HS DE KITOY	No	Neg	NA	Neg	Neg	NA	Neg	Neg	Neg	Neg	0	0	0	0	Pos	Pos	0	0	2+	2+	NA	0	15/08/2015	NA	NA	Yes	72	Not ambiguous	Not ambiguous	5117	Neg	FALSE	M	Fixed	FALSE	0	0	0	0	0	0	1	1	Neg	Neg	Neg	Neg	Neg
M601	HS DE KITOY	No	Neg	NA	Neg	Neg	NA	Neg	Neg	Neg	Neg	0	0	0	0	Pos	Pos	2+	2+	0	0	NA	0	17/08/2015	NA	NA	Yes	23	Not ambiguous	Not ambiguous	5119	Neg	FALSE	M	Fixed	FALSE	0	0	0	0	1	1	0	0	Neg	Neg	Neg	Neg	Pos
M799	HS DE KITOY	No	Neg	NA	Neg	Neg	NA	Pos	Pos	Pos	Pos	1+	1+	0	0	Neg	Neg	0	0	0	0	NA	0	31/08/2015	1	NA	Yes	6	Not ambiguous	Not ambiguous	5121	Neg	FALSE	M	Fixed	FALSE	1	1	0	0	0	0	0	0	Pos	Pos	Neg	Neg	Neg
M602	HS DE KITOY	No	Neg	NA	Neg	Neg	NA	Neg	Neg	Neg	Neg	0	0	0	0	Pos	Pos	0	0	1+	1+	NA	0	17/08/2015	NA	NA	Yes	53	Not ambiguous	Not ambiguous	5123	Neg	FALSE	M	Fixed	FALSE	0	0	0	0	0	0	1	1	Neg	Neg	Neg	Neg	Neg
P769	HGR/MASI-MANIMBA	No	Neg	Pos	Neg	Neg	NA	Pos	Pos	Pos	Pos	1+	1+	1+	1+	Pos	Pos	2+	2+	2+	2+	NA	0	19/09/2015	99	422	Yes	22	Not ambiguous	Not ambiguous	5125	Pos	TRUE	P	Fixed	FALSE	1	1	1	1	1	1	1	1	Pos	Pos	Pos	Pos	Pos
M612	HS DE KITOY	No	Neg	NA	Neg	Neg	NA	Neg	Neg	Neg	Neg	0	0	0	0	Pos	Pos	2+	2+	0	0	NA	0	19/08/2015	NA	NA	Yes	30	Not ambiguous	Not ambiguous	5127	Neg	FALSE	M	Fixed	FALSE	0	0	0	0	1	1	0	0	Neg	Neg	Neg	Neg	Pos
M640	HS DE KITOY	No	Neg	NA	Neg	Neg	NA	Neg	Neg	Neg	Neg	0	0	0	0	Pos	Pos	0	0	2+	3+	NA	0	21/08/2015	NA	NA	Yes	5	Not ambiguous	Not ambiguous	5129	Neg	FALSE	M	Fixed	FALSE	0	0	0	0	0	0	1	1	Neg	Neg	Neg	Neg	Neg
P776	HGR/MASI-MANIMBA	No	Neg	Pos	Neg	Pos	NA	Pos	Pos	Pos	Pos	2+	2+	0	0	Pos	Pos	2+	3+	1+	1+	NA	0	21/09/2015	NA	330	Yes	43	Not ambiguous	Not ambiguous	5131	Pos	TRUE	P	Fixed	FALSE	1	1	0	0	1	1	1	1	Pos	Pos	Neg	Neg	Pos
M641	HS DE KITOY	No	Neg	NA	Neg	Neg	NA	Pos	Pos	Neg	Neg	0	0	0	0	Pos	Pos	1+	1+	0	0	NA	0	21/08/2015	NA	NA	Yes	6	Not ambiguous	Not ambiguous	5133	Neg	FALSE	M	Fixed	FALSE	0	0	0	0	1	1	0	0	Neg	Neg	Neg	Neg	Pos
P793	HGR/MASI-MANIMBA	No	NA	Neg	NA	NA	Pos	Pos	Pos	Pos	Pos	1+	1+	1+	1+	Pos	Pos	4+	4+	2+	3+	NA	0	22/09/2015	99	7	Yes	16	Not ambiguous	Not ambiguous	5135	Pos	TRUE	P	Fixed	FALSE	1	1	1	1	1	1	1	1	Pos	Pos	Pos	Pos	Pos
M642	HS DE KITOY	No	Neg	NA	Neg	Neg	NA	Neg	Neg	Neg	Neg	0	0	0	0	Pos	Pos	1+	1+	2+	2+	NA	0	21/08/2015	NA	NA	Yes	20	Not ambiguous	Not ambiguous	5137	Neg	FALSE	M	Fixed	FALSE	0	0	0	0	1	1	1	1	Neg	Neg	Neg	Neg	Pos
P794	HGR/MASI-MANIMBA	No	Neg	Neg	Pos	Pos	NA	Pos	Pos	Pos	Pos	1+	1+	1+	1+	Pos	Pos	4+	4+	3+	3+	NA	0	22/09/2015	99	2	Yes	25	Not ambiguous	Not ambiguous	5139	Pos	TRUE	P	Fixed	FALSE	1	1	1	1	1	1	1	1	Pos	Pos	Pos	Pos	Pos
M649	HS DE KITOY	No	Neg	NA	Neg	Neg	NA	Neg	Neg	Neg	Neg	0	0	0	0	Pos	Pos	2+	2+	0	0	NA	0	21/08/2015	NA	NA	Yes	32	Not ambiguous	Not ambiguous	5141	Neg	FALSE	M	Fixed	FALSE	0	0	0	0	1	1	0	0	Neg	Neg	Neg	Neg	Pos
M662	HS DE KITOY	No	Neg	NA	Neg	Neg	NA	Neg	Neg	Neg	Neg	0	0	0	0	Pos	Pos	0	0	1+	1+	NA	0	22/08/2015	NA	NA	Yes	38	Not ambiguous	Not ambiguous	5143	Neg	FALSE	M	Fixed	FALSE	0	0	0	0	0	0	1	1	Neg	Neg	Neg	Neg	Neg
P755	HGR/MASI-MANIMBA	No	Neg	NA	Neg	Neg	Neg	Pos	Pos	Neg	Neg	0	0	0	0	Neg	Neg	0	0	0	0	NA	0	16/09/2015	NA	NA	Yes	24	Ambiguous	Ambiguous	5145	Neg	FALSE	P	Fixed	FALSE	0	0	0	0	0	0	0	0	Neg	Neg	Neg	Neg	Neg
M666	HS DE KITOY	No	Neg	NA	Neg	Neg	NA	Pos	Pos	Neg	Neg	0	0	0	0	Pos	Pos	0	0	2+	2+	NA	0	22/08/2015	NA	NA	Yes	19	Not ambiguous	Not ambiguous	5147	Neg	FALSE	M	Fixed	FALSE	0	0	0	0	0	0	1	1	Neg	Neg	Neg	Neg	Neg
M675	HS DE KITOY	No	Neg	NA	Neg	Neg	NA	Neg	Neg	Pos	Pos	1+	1+	0	0	Neg	Neg	0	0	0	0	NA	0	22/08/2015	14	NA	Yes	30	Not ambiguous	Not ambiguous	5151	Neg	FALSE	M	Fixed	FALSE	1	1	0	0	0	0	0	0	Pos	Pos	Neg	Neg	Neg
P937	HGR/MASIMANIMBA	No	Neg	NA	Neg	Neg	NA	Pos	Pos	Pos	Pos	1+	1+	0	0	Neg	Neg	0	0	0	0	NA	0	16/10/2015	99	NA	Yes	20	Not ambiguous	Not ambiguous	5153	Neg	FALSE	P	Fixed	FALSE	1	1	0	0	0	0	0	0	Pos	Pos	Neg	Neg	Neg
M676	HS DE KITOY	No	Neg	NA	Neg	Neg	NA	Neg	Neg	Pos	Pos	2+	3+	0	0	Neg	Neg	0	0	0	0	NA	0	22/08/2015	NA	NA	Yes	3	Not ambiguous	Not ambiguous	5155	Neg	FALSE	M	Fixed	FALSE	1	1	0	0	0	0	0	0	Pos	Pos	Neg	Neg	Neg
P728	HGR/MASIMANIMBA	No	Neg	NA	Neg	Neg	NA	Pos	Pos	Neg	Neg	0	0	0	0	Pos	Pos	0	0	1+	1+	NA	0	11/09/2015	NA	NA	Yes	22	Not ambiguous	Not ambiguous	5157	Neg	FALSE	P	Fixed	FALSE	0	0	0	0	0	0	1	1	Neg	Neg	Neg	Neg	Neg
M678	HS DE KITOY	No	Neg	NA	Neg	Neg	NA	Pos	Pos	Neg	Neg	0	0	0	0	Pos	Pos	0	0	2+	2+	NA	0	22/08/2015	NA	NA	Yes	20	Not ambiguous	Not ambiguous	5159	Neg	FALSE	M	Fixed	FALSE	0	0	0	0	0	0	1	1	Neg	Neg	Neg	Neg	Neg
M680	HS DE KITOY	No	Neg	NA	Neg	Neg	NA	Neg	Neg	Pos	Pos	1+	1+	0	0	Neg	Neg	0	0	0	0	NA	0	22/08/2015	14	NA	Yes	23	Not ambiguous	Not ambiguous	5161	Neg	FALSE	M	Fixed	FALSE	1	1	0	0	0	0	0	0	Pos	Pos	Neg	Neg	Neg
P730	HGR/MASI-MANIMBA	No	Neg	NA	Neg	Neg	NA	Pos	Pos	Neg	Neg	0	0	0	0	Pos	Pos	0	0	2+	2+	NA	0	14/09/2015	NA	NA	Yes	35	Ambiguous	Ambiguous	5163	Neg	FALSE	P	Fixed	FALSE	0	0	0	0	0	0	1	1	Neg	Neg	Neg	Neg	Neg
M693	HS DE KITOY	No	Neg	NA	Neg	Neg	NA	Neg	Neg	Neg	Neg	0	0	0	0	Pos	Pos	0	0	2+	2+	NA	0	22/08/2015	NA	NA	Yes	0	Not ambiguous	Not ambiguous	5167	Neg	FALSE	M	Fixed	FALSE	0	0	0	0	0	0	1	1	Neg	Neg	Neg	Neg	Neg
P735	HGR/MASIMANIMBA	No	Neg	NA	Neg	Neg	NA	Pos	Pos	Neg	Neg	0	0	0	0	Pos	Pos	0	0	1+	1+	NA	0	15/09/2015	NA	NA	Yes	13	Ambiguous	Ambiguous	5169	Neg	FALSE	P	Fixed	FALSE	0	0	0	0	0	0	1	1	Neg	Neg	Neg	Neg	Neg
M705	HS DE KITOY	No	Neg	NA	Neg	Neg	NA	Neg	Neg	Pos	Pos	0	0	1+	1+	Neg	Neg	0	0	0	0	NA	0	24/08/2015	NA	NA	Yes	11	Not ambiguous	Not ambiguous	5171	Neg	FALSE	M	Fixed	FALSE	0	0	1	1	0	0	0	0	Neg	Neg	Pos	Pos	Neg
M708	HS DE KITOY	No	Neg	NA	Neg	Neg	NA	Neg	Neg	Neg	Neg	0	0	0	0	Pos	Pos	0	0	2+	2+	NA	0	24/08/2015	NA	NA	Yes	10	Not ambiguous	Not ambiguous	5173	Neg	FALSE	M	Fixed	FALSE	0	0	0	0	0	0	1	1	Neg	Neg	Neg	Neg	Neg
P748	HGR/MASI	No	Neg	NA	Neg	Neg	NA	Pos	Pos	Neg	Neg	0	0	0	0	Pos	Pos	0	0	2+	2+	NA	0	16/09/2015	NA	NA	Yes	39	Not ambiguous	Not ambiguous	5175	Neg	FALSE	P	Fixed	FALSE	0	0	0	0	0	0	1	1	Neg	Neg	Neg	Neg	Neg
M711	HS DE KITOY	No	Neg	NA	Neg	Neg	NA	Neg	Neg	Neg	Neg	0	0	0	0	Pos	Pos	0	0	1+	1+	NA	0	24/08/2015	NA	NA	Yes	21	Not ambiguous	Not ambiguous	5177	Neg	FALSE	M	Fixed	FALSE	0	0	0	0	0	0	1	1	Neg	Neg	Neg	Neg	Neg
M713	HS DE KITOY	No	Neg	NA	Neg	Neg	NA	Neg	Neg	Neg	Neg	0	0	0	0	Pos	Pos	2+	3+	0	0	NA	0	25/08/2015	NA	NA	Yes	30	Not ambiguous	Not ambiguous	5179	Neg	FALSE	M	Fixed	FALSE	0	0	0	0	1	1	0	0	Neg	Neg	Neg	Neg	Pos
M719	HS DE KITOY	No	Neg	NA	Neg	Neg	NA	Neg	Neg	Neg	Neg	0	0	0	0	Pos	Pos	3+	2+	0	0	NA	0	25/08/2015	NA	NA	Yes	30	Not ambiguous	Not ambiguous	5181	Neg	FALSE	M	Fixed	FALSE	0	0	0	0	1	1	0	0	Neg	Neg	Neg	Neg	Pos
P754	HGR/MASIMANIMBA	No	Neg	NA	Neg	Neg	NA	Pos	Pos	Neg	Neg	0	0	0	0	Neg	Neg	0	0	0	0	NA	0	16/09/2015	NA	NA	Yes	24	Not ambiguous	Not ambiguous	5183	Neg	FALSE	P	Fixed	FALSE	0	0	0	0	0	0	0	0	Neg	Neg	Neg	Neg	Neg
M738	HS DE KITOY	No	Neg	NA	Neg	Neg	NA	Neg	Neg	Neg	Neg	0	0	0	0	Pos	Pos	0	0	2+	2+	NA	0	26/08/2015	NA	NA	Yes	3	Not ambiguous	Not ambiguous	5185	Neg	FALSE	M	Fixed	FALSE	0	0	0	0	0	0	1	1	Neg	Neg	Neg	Neg	Neg
P772	HGR/MASIMANIMBA	No	Neg	NA	Neg	Neg	NA	Neg	Neg	Neg	Neg	0	0	0	0	Pos	Pos	1+	1+	2+	2+	NA	0	21/09/2015	NA	NA	Yes	69	Not ambiguous	Not ambiguous	5187	Neg	FALSE	P	Fixed	FALSE	0	0	0	0	1	1	1	1	Neg	Neg	Neg	Neg	Pos
M760	HS DE KITOY	No	Neg	NA	Neg	Neg	NA	Neg	Neg	Neg	Neg	0	0	0	0	Pos	Pos	2+	2+	0	0	NA	0	27/08/2015	NA	NA	Yes	19	Not ambiguous	Not ambiguous	5189	Neg	FALSE	M	Fixed	FALSE	0	0	0	0	1	1	0	0	Neg	Neg	Neg	Neg	Pos
M763	HS DE KITOY	No	Neg	NA	Neg	Neg	NA	Neg	Neg	Neg	Neg	0	0	0	0	Pos	Pos	3+	3+	0	0	NA	0	28/08/2015	NA	NA	Yes	7	Not ambiguous	Not ambiguous	5191	Neg	FALSE	M	Fixed	FALSE	0	0	0	0	1	1	0	0	Neg	Neg	Neg	Neg	Pos
P773	HGR/MASIMANIMBA	No	Neg	NA	Neg	Neg	NA	Neg	Neg	Pos	Pos	3+	2+	1+	2+	Pos	Pos	0	0	1+	1+	NA	0	21/09/2015	NA	NA	Yes	27	Not ambiguous	Not ambiguous	5193	Neg	FALSE	P	Fixed	FALSE	1	1	1	1	0	0	1	1	Pos	Pos	Pos	Pos	Neg
M772	HS DE KITOY	No	Neg	NA	Neg	Neg	NA	Pos	Pos	Pos	Pos	3+	3+	2+	2+	Neg	Neg	0	0	0	0	NA	0	28/08/2015	NA	NA	Yes	29	Not ambiguous	Not ambiguous	5195	Neg	FALSE	M	Fixed	FALSE	1	1	1	1	0	0	0	0	Pos	Pos	Pos	Pos	Neg
M773	HS DE KITOY	No	Neg	NA	Neg	Neg	Neg	Neg	Neg	Pos	Pos	3+	2+	0	0	Neg	Neg	0	0	0	0	NA	0	28/08/2015	NA	NA	Yes	7	Not ambiguous	Not ambiguous	5199	Neg	FALSE	M	Fixed	FALSE	1	1	0	0	0	0	0	0	Pos	Pos	Neg	Neg	Neg
M775	HS DE KITOY	No	Neg	NA	Neg	Neg	NA	Neg	Neg	Neg	Neg	0	0	0	0	Pos	Pos	0	0	2+	2+	NA	0	28/08/2015	NA	NA	Yes	45	Not ambiguous	Not ambiguous	5201	Neg	FALSE	M	Fixed	FALSE	0	0	0	0	0	0	1	1	Neg	Neg	Neg	Neg	Neg
P790	HGR/MASI	No	Neg	NA	Neg	Neg	NA	Neg	Neg	Pos	Pos	2+	2+	2+	2+	Neg	Neg	0	0	0	0	NA	0	22/09/2015	NA	NA	Yes	19	Not ambiguous	Ambiguous	5203	Neg	FALSE	P	Fixed	FALSE	1	1	1	1	0	0	0	0	Pos	Pos	Pos	Pos	Neg
M776	HS DE KITOY	No	Neg	NA	Neg	Neg	NA	Pos	Pos	Neg	Neg	0	0	0	0	Pos	Pos	0	0	1+	1+	NA	0	28/08/2015	NA	NA	Yes	13	Not ambiguous	Not ambiguous	5205	Neg	FALSE	M	Fixed	FALSE	0	0	0	0	0	0	1	1	Neg	Neg	Neg	Neg	Neg
M791	HS DE KITOY	No	Neg	NA	Neg	Neg	NA	Pos	Pos	Neg	Neg	0	0	0	0	Pos	Pos	0	0	2+	2+	NA	0	29/08/2015	NA	NA	Yes	4	Not ambiguous	Not ambiguous	5207	Neg	FALSE	M	Fixed	FALSE	0	0	0	0	0	0	1	1	Neg	Neg	Neg	Neg	Neg
M793	HS DE KITOY	No	Neg	NA	Neg	Neg	NA	Neg	Neg	Neg	Neg	0	0	0	0	Pos	Pos	1+	1+	0	0	NA	0	29/08/2015	NA	NA	Yes	52	Not ambiguous	Not ambiguous	5211	Neg	FALSE	M	Fixed	FALSE	0	0	0	0	1	1	0	0	Neg	Neg	Neg	Neg	Pos
P818	HGR/MASIMANIMBA	No	Neg	NA	Neg	Neg	NA	Neg	Neg	Neg	Neg	0	0	0	0	Pos	Pos	1+	2+	2+	3+	NA	0	25/09/2015	NA	NA	Yes	27	Not ambiguous	Not ambiguous	5215	Neg	FALSE	P	Fixed	FALSE	0	0	0	0	1	1	1	1	Neg	Neg	Neg	Neg	Pos
P831	HGR/MASI-MANIMBA	No	Neg	NA	Neg	Neg	NA	Pos	Pos	Pos	Pos	0	0	1+	1+	Pos	Pos	0	0	2+	2+	NA	0	05/10/2015	NA	NA	Yes	30	Not ambiguous	Not ambiguous	5219	Neg	FALSE	P	Fixed	FALSE	0	0	1	1	0	0	1	1	Neg	Neg	Pos	Pos	Neg
P889	HGR/MASIMANIMBA	No	Neg	NA	Neg	Neg	NA	Pos	Pos	Neg	Neg	0	0	0	0	Neg	Neg	0	0	0	0	NA	0	12/10/2015	NA	NA	Yes	21	Ambiguous	Ambiguous	5221	Neg	FALSE	P	Fixed	FALSE	0	0	0	0	0	0	0	0	Neg	Neg	Neg	Neg	Neg
P837	HGR/MASI-MANIMBA	No	Neg	NA	Neg	Neg	NA	Pos	Pos	Neg	Neg	0	0	0	0	Neg	Neg	0	0	0	0	NA	0	05/10/2015	NA	NA	Yes	20	Ambiguous	Ambiguous	5225	Neg	FALSE	P	Fixed	FALSE	0	0	0	0	0	0	0	0	Neg	Neg	Neg	Neg	Neg
P860	HGR/MASI-MANIMBA	No	Neg	NA	Neg	Neg	NA	Neg	Neg	Pos	Pos	1+	1+	1+	1+	Neg	Neg	0	0	0	0	NA	0	07/10/2015	99	NA	Yes	16	Not ambiguous	Not ambiguous	5227	Neg	FALSE	P	Fixed	FALSE	1	1	1	1	0	0	0	0	Pos	Pos	Pos	Pos	Neg
P893	HGR/MASIMANIMBA	No	Neg	NA	Neg	Neg	NA	Pos	Pos	Pos	Pos	1+	1+	0	0	Pos	Pos	2+	2+	2+	2+	NA	0	12/10/2015	99	NA	Yes	23	Not ambiguous	Not ambiguous	5229	Neg	FALSE	P	Fixed	FALSE	1	1	0	0	1	1	1	1	Pos	Pos	Neg	Neg	Pos
P863	HGR/MASI-MANIMBA	No	Neg	NA	Neg	Neg	NA	Neg	Neg	Pos	Pos	2+	2+	1+	1+	Neg	Neg	0	0	0	0	NA	0	07/10/2015	NA	NA	Yes	2	Not ambiguous	Not ambiguous	5231	Neg	FALSE	P	Fixed	FALSE	1	1	1	1	0	0	0	0	Pos	Pos	Pos	Pos	Neg
P865	HGR/MASI-MANIMBA	No	Neg	NA	Neg	Neg	NA	Pos	Pos	Neg	Neg	0	0	0	0	Neg	Neg	0	0	0	0	NA	0	07/10/2015	NA	NA	Yes	40	Ambiguous	Ambiguous	5233	Neg	FALSE	P	Fixed	FALSE	0	0	0	0	0	0	0	0	Neg	Neg	Neg	Neg	Neg
P869	HGR/MASI-MANIMBA	No	Neg	NA	Neg	Neg	Neg	Neg	Neg	Neg	Neg	0	0	0	0	Pos	Pos	0	0	2+	2+	NA	0	08/10/2015	NA	NA	Yes	20	Not ambiguous	Not ambiguous	5237	Neg	FALSE	P	Fixed	FALSE	0	0	0	0	0	0	1	1	Neg	Neg	Neg	Neg	Neg
P879	HGR/MASI-MANIMBA	No	Neg	NA	Neg	Neg	NA	Pos	Pos	Pos	Pos	0	0	1+	1+	Pos	Pos	1+	1+	2+	2+	NA	0	09/10/2015	NA	NA	Yes	44	Not ambiguous	Not ambiguous	5239	Neg	FALSE	P	Fixed	FALSE	0	0	1	1	1	1	1	1	Neg	Neg	Pos	Pos	Pos
P910	HGR/MASIMANIMBA	No	Neg	NA	Neg	Neg	NA	Pos	Pos	Neg	Neg	0	0	0	0	Neg	Neg	0	0	0	0	NA	0	13/10/2015	NA	NA	Yes	27	Ambiguous	Ambiguous	5241	Neg	FALSE	P	Fixed	FALSE	0	0	0	0	0	0	0	0	Neg	Neg	Neg	Neg	Neg
P913	HGR/MASIMANIMBA	No	Neg	NA	Neg	Neg	NA	Pos	Pos	Pos	Pos	2+	2+	1+	1+	Pos	Pos	0	0	2+	2+	NA	0	14/10/2015	NA	NA	Yes	19	Not ambiguous	Not ambiguous	5243	Neg	FALSE	P	Fixed	FALSE	1	1	1	1	0	0	1	1	Pos	Pos	Pos	Pos	Neg
P915	HGR/MASIMANIMBA	No	Neg	NA	Neg	Neg	NA	Pos	Pos	Pos	Pos	1+	1+	0	0	Neg	Neg	0	0	0	0	NA	0	14/10/2015	99	NA	Yes	27	Not ambiguous	Not ambiguous	5247	Neg	FALSE	P	Fixed	FALSE	1	1	0	0	0	0	0	0	Pos	Pos	Neg	Neg	Neg
P921	HGR/MASIMANIMBA	No	Neg	NA	Neg	Neg	NA	Pos	Pos	Neg	Neg	0	0	0	0	Neg	Neg	0	0	0	0	NA	0	15/10/2015	NA	NA	Yes	58	Not ambiguous	Not ambiguous	5250	Neg	FALSE	P	Fixed	FALSE	0	0	0	0	0	0	0	0	Neg	Neg	Neg	Neg	Neg
P925	HGR/MASIMANIMBA	No	Neg	NA	Neg	Neg	NA	Pos	Pos	Neg	Neg	0	0	0	0	Neg	Neg	0	0	0	0	NA	0	15/10/2015	NA	NA	Yes	19	Ambiguous	Ambiguous	5253	Neg	FALSE	P	Fixed	FALSE	0	0	0	0	0	0	0	0	Neg	Neg	Neg	Neg	Neg
P932	HGR/MASIMANIMBA	No	Neg	NA	Neg	Neg	NA	Pos	Pos	Neg	Neg	0	0	0	0	Pos	Pos	0	0	1+	1+	NA	0	16/10/2015	NA	NA	Yes	39	Not ambiguous	Not ambiguous	5255	Neg	FALSE	P	Fixed	FALSE	0	0	0	0	0	0	1	1	Neg	Neg	Neg	Neg	Neg
P939	HGR/MASIMANIMBA	No	Neg	NA	Neg	Neg	Neg	Pos	Pos	Neg	Neg	0	0	0	0	Pos	Pos	0	0	2+	2+	NA	0	16/10/2015	NA	NA	Yes	14	Not ambiguous	Not ambiguous	5257	Neg	FALSE	P	Fixed	FALSE	0	0	0	0	0	0	1	1	Neg	Neg	Neg	Neg	Neg
N915	MASAMUNA	No	Neg	NA	Neg	Neg	NA	Pos	Pos	Pos	Pos	1+	1+	0	0	Pos	Pos	0	0	1+	1+	NA	0	19/09/2015	5	NA	Yes	20	Not ambiguous	Not ambiguous	5260	Neg	FALSE	N	Fixed	FALSE	1	1	0	0	0	0	1	1	Pos	Pos	Neg	Neg	Neg
N918	MASAMUNA	No	Neg	NA	Neg	Neg	NA	Pos	Pos	Neg	Neg	0	0	0	0	Pos	Pos	0	0	2+	2+	NA	0	19/09/2015	NA	NA	Yes	64	Not ambiguous	Not ambiguous	5263	Neg	FALSE	N	Fixed	FALSE	0	0	0	0	0	0	1	1	Neg	Neg	Neg	Neg	Neg
N957	MASAMUNA	No	Neg	NA	Neg	Neg	NA	Neg	Neg	Neg	Neg	0	0	0	0	Pos	Pos	0	0	1+	1+	NA	0	25/09/2015	NA	NA	Yes	18	Not ambiguous	Not ambiguous	5268	Neg	FALSE	N	Fixed	FALSE	0	0	0	0	0	0	1	1	Neg	Neg	Neg	Neg	Neg
N975	MASAMUNA	No	Neg	NA	Neg	Neg	NA	Neg	Neg	Neg	Neg	0	0	0	0	Pos	Pos	0	0	2+	2+	NA	0	02/10/2015	NA	NA	Yes	10	Not ambiguous	Not ambiguous	5273	Neg	FALSE	N	Fixed	FALSE	0	0	0	0	0	0	1	1	Neg	Neg	Neg	Neg	Neg
M539	HS DE KITOY	No	Neg	NA	Neg	Neg	NA	Neg	Neg	Neg	Neg	0	0	0	0	Pos	Pos	0	0	1+	1+	NA	0	11/08/2015	NA	NA	Yes	28	Not ambiguous	Not ambiguous	5346	Neg	FALSE	M	Fixed	FALSE	0	0	0	0	0	0	1	1	Neg	Neg	Neg	Neg	Neg
M686	HS DE KITOY	No	Neg	NA	Neg	Neg	NA	Pos	Pos	Neg	Neg	0	0	0	0	Pos	Pos	2+	2+	0	0	NA	0	22/08/2015	NA	NA	Yes	49	Not ambiguous	Not ambiguous	5348	Neg	FALSE	M	Fixed	FALSE	0	0	0	0	1	1	0	0	Neg	Neg	Neg	Neg	Pos
M792	HS DE KITOY	No	Neg	NA	Neg	Neg	NA	Neg	Neg	Pos	Pos	0	0	3+	3+	Pos	Pos	0	0	3+	2+	NA	0	29/08/2015	NA	NA	Yes	30	Not ambiguous	Not ambiguous	5350	Neg	FALSE	M	Fixed	FALSE	0	0	1	1	0	0	1	1	Neg	Neg	Pos	Pos	Neg
M825	HS DE KITOY	No	Neg	NA	Neg	Neg	Neg	Neg	Neg	Neg	Neg	0	0	0	0	Pos	Pos	2+	2+	2+	2+	NA	0	14/09/2015	NA	NA	Yes	0	Not ambiguous	Not ambiguous	5355	Neg	FALSE	M	Fixed	FALSE	0	0	0	0	1	1	1	1	Neg	Neg	Neg	Neg	Pos
M817	HS DE KITOY	No	Neg	NA	Neg	Neg	NA	Neg	Neg	Neg	Neg	0	0	0	0	Pos	Pos	1+	2+	1+	2+	NA	0	12/09/2015	NA	NA	Yes	0	Not ambiguous	Not ambiguous	5357	Neg	FALSE	M	Fixed	FALSE	0	0	0	0	1	1	1	1	Neg	Neg	Neg	Neg	Pos
M815	HS DE KITOY	No	Neg	NA	Neg	Neg	NA	Neg	Neg	Pos	Pos	1+	0	1+	1+	Pos	Pos	1+	1+	1+	1+	NA	0	12/09/2015	4	NA	Yes	0	Not ambiguous	Not ambiguous	5359	Neg	FALSE	M	Fixed	FALSE	1	0	1	1	1	1	1	1	Pos	Neg	Pos	Pos	Pos
M794	HS DE KITOY	No	Neg	NA	Neg	Neg	NA	Neg	Neg	Pos	Pos	0	0	2+	2+	Neg	Neg	0	0	0	0	NA	0	29/08/2015	NA	NA	Yes	37	Not ambiguous	Not ambiguous	5361	Neg	FALSE	M	Fixed	FALSE	0	0	1	1	0	0	0	0	Neg	Neg	Pos	Pos	Neg
M526	HS DE KITOY	No	Neg	NA	Neg	Neg	NA	Neg	Neg	Pos	Pos	0	0	1+	1+	Pos	Pos	0	0	2+	2+	NA	0	11/08/2015	NA	NA	Yes	4	Not ambiguous	Not ambiguous	5363	Neg	FALSE	M	Fixed	FALSE	0	0	1	1	0	0	1	1	Neg	Neg	Pos	Pos	Neg
M786	HS DE KITOY	No	Neg	NA	Neg	Neg	NA	Pos	Pos	Neg	Neg	0	0	0	0	Pos	Pos	2+	2+	0	0	NA	0	29/08/2015	NA	NA	Yes	40	Not ambiguous	Not ambiguous	5365	Neg	FALSE	M	Fixed	FALSE	0	0	0	0	1	1	0	0	Neg	Neg	Neg	Neg	Pos
M844	HS DE KITOY	No	Neg	NA	Neg	Neg	NA	Pos	Pos	Neg	Neg	0	0	0	0	Pos	Pos	0	0	1+	1+	NA	0	15/09/2015	NA	NA	Yes	0	Not ambiguous	Not ambiguous	5369	Neg	FALSE	M	Fixed	FALSE	0	0	0	0	0	0	1	1	Neg	Neg	Neg	Neg	Neg
M525	HS DE KITOY	No	Neg	NA	Neg	Neg	NA	Neg	Neg	Pos	Pos	0	0	1+	1+	Pos	Pos	0	0	2+	2+	NA	0	11/08/2015	NA	NA	Yes	4	Not ambiguous	Not ambiguous	5379	Neg	FALSE	M	Fixed	FALSE	0	0	1	1	0	0	1	1	Neg	Neg	Pos	Pos	Neg
L703	HS NKARA	No	Neg	NA	Neg	Neg	NA	Neg	Neg	Pos	Pos	1+	1+	2+	2+	Neg	Neg	0	0	0	0	NA	0	09/09/2015	3	NA	Yes	8	Not ambiguous	Not ambiguous	5381	Neg	FALSE	L	Fixed	FALSE	1	1	1	1	0	0	0	0	Pos	Pos	Pos	Pos	Neg
L939	HS/NKARA	Yes	Neg	Neg	Pos	Pos	NA	Neg	Neg	Neg	Neg	0	0	0	0	Pos	Pos	0	0	2+	2+	NA	0	09/10/2015	NA	1	Yes	4	Not ambiguous	Not ambiguous	5384	Pos	TRUE	L	Fixed	FALSE	0	0	0	0	0	0	1	1	Neg	Neg	Neg	Neg	Neg
L967	HS/NKARA	No	Pos	Neg	Neg	Pos	NA	Pos	Pos	Pos	Pos	2+	2+	2+	2+	Pos	Pos	2+	2+	0	0	NA	0	10/10/2015	NA	2	Yes	14	Not ambiguous	Not ambiguous	5386	Pos	TRUE	L	Fixed	FALSE	1	1	1	1	1	1	0	0	Pos	Pos	Pos	Pos	Pos
L991	HS/NKARA	No	Neg	Neg	Neg	Pos	NA	Neg	Neg	Neg	Neg	0	0	0	0	Pos	Pos	2+	2+	0	0	NA	0	13/10/2015	NA	0	Yes	32	Not ambiguous	Not ambiguous	5388	Pos	TRUE	L	Fixed	FALSE	0	0	0	0	1	1	0	0	Neg	Neg	Neg	Neg	Pos
L994	HS/NKARA	No	Neg	Neg	Pos	Pos	NA	Pos	Pos	Pos	Pos	1+	1+	0	0	Pos	Pos	0	0	1+	1+	NA	0	14/10/2015	3	1	Yes	12	Not ambiguous	Not ambiguous	5390	Pos	TRUE	L	Fixed	FALSE	1	1	0	0	0	0	1	1	Pos	Pos	Neg	Neg	Neg
L1008	HS/NKARA	No	Neg	Neg	Pos	Pos	NA	Neg	Neg	Pos	Pos	1+	1+	0	0	Neg	Neg	0	0	0	0	NA	0	15/10/2015	5	4	Yes	12	Not ambiguous	Not ambiguous	5392	Pos	TRUE	L	Fixed	FALSE	1	1	0	0	0	0	0	0	Pos	Pos	Neg	Neg	Neg
N1052	MASAMUNA	Yes	Neg	Neg	Neg	Pos	NA	Pos	Pos	Pos	Pos	2+	2+	2+	2+	Pos	Pos	2+	2+	2+	2+	NA	0	13/10/2015	NA	20	Yes	38	Not ambiguous	Not ambiguous	5394	Pos	TRUE	N	Fixed	FALSE	1	1	1	1	1	1	1	1	Pos	Pos	Pos	Pos	Pos
N1092	MASAMUNA	Yes	Neg	Pos	Neg	Pos	NA	Pos	Pos	Pos	Pos	1+	1+	0	0	Pos	Pos	2+	2+	2+	2+	NA	0	19/10/2015	2	87	Yes	8	Not ambiguous	Not ambiguous	5398	Pos	TRUE	N	Fixed	FALSE	1	1	0	0	1	1	1	1	Pos	Pos	Neg	Neg	Pos
N1213	MASAMUNA	No	Neg	Neg	Neg	Pos	NA	Pos	Pos	Pos	Pos	2+	2+	2+	2+	Pos	Pos	2+	2+	0	0	NA	0	02/11/2015	NA	81	Yes	22	Ambiguous	Ambiguous	5401	Pos	TRUE	N	Fixed	FALSE	1	1	1	1	1	1	0	0	Pos	Pos	Pos	Pos	Pos
N1036	MASAMUNA	No	Neg	NA	Neg	Neg	NA	Neg	Neg	Neg	Neg	0	0	0	0	Pos	Pos	2+	2+	0	0	NA	0	09/10/2015	NA	NA	Yes	4	Not ambiguous	Not ambiguous	5405	Neg	FALSE	N	Fixed	FALSE	0	0	0	0	1	1	0	0	Neg	Neg	Neg	Neg	Pos
N1045	MASAMUNA	No	Neg	NA	Neg	Neg	NA	Neg	Neg	Pos	Pos	1+	1+	0	0	Neg	Neg	0	0	0	0	NA	0	12/10/2015	1	NA	Yes	4	Not ambiguous	Not ambiguous	5407	Neg	FALSE	N	Fixed	FALSE	1	1	0	0	0	0	0	0	Pos	Pos	Neg	Neg	Neg
N1051	MASAMUNA	No	Neg	NA	Neg	Neg	NA	Neg	Neg	Neg	Neg	0	0	0	0	Neg	Neg	0	0	0	0	NA	0	13/10/2015	NA	NA	Yes	81	Not ambiguous	Not ambiguous	5409	Neg	FALSE	N	Fixed	FALSE	0	0	0	0	0	0	0	0	Neg	Neg	Neg	Neg	Neg
N1059	MASAMUNA	No	Neg	NA	Neg	Neg	NA	Neg	Neg	Neg	Neg	0	0	0	0	Pos	Pos	0	0	1+	1+	NA	0	14/10/2015	NA	NA	Yes	12	Not ambiguous	Not ambiguous	5411	Neg	FALSE	N	Fixed	FALSE	0	0	0	0	0	0	1	1	Neg	Neg	Neg	Neg	Neg
N1069	MASAMUNA	No	Neg	NA	Neg	Neg	NA	Pos	Pos	Pos	Pos	1+	1+	0	0	Neg	Neg	0	0	0	0	NA	0	15/10/2015	2	NA	Yes	25	Not ambiguous	Not ambiguous	5414	Neg	FALSE	N	Fixed	FALSE	1	1	0	0	0	0	0	0	Pos	Pos	Neg	Neg	Neg
N1086	MASAMUNA	No	Neg	NA	Neg	Neg	NA	Neg	Neg	Neg	Neg	0	0	0	0	Pos	Pos	0	0	1+	1+	NA	0	19/10/2015	NA	NA	Yes	31	Not ambiguous	Not ambiguous	5418	Neg	FALSE	N	Fixed	FALSE	0	0	0	0	0	0	1	1	Neg	Neg	Neg	Neg	Neg
N1093	MASAMUNA	No	Neg	NA	Neg	Neg	NA	Neg	Neg	Neg	Neg	0	0	0	0	Pos	Pos	0	0	2+	2+	NA	0	19/10/2015	NA	NA	Yes	7	Not ambiguous	Not ambiguous	5420	Neg	FALSE	N	Fixed	FALSE	0	0	0	0	0	0	1	1	Neg	Neg	Neg	Neg	Neg
N1102	MASAMUNA	No	Neg	NA	Neg	Neg	NA	Neg	Neg	Neg	Neg	0	0	0	0	Neg	Neg	0	0	0	0	NA	0	20/10/2015	NA	NA	Yes	20	Not ambiguous	Not ambiguous	5422	Neg	FALSE	N	Fixed	FALSE	0	0	0	0	0	0	0	0	Neg	Neg	Neg	Neg	Neg
N1104	MASAMUNA	No	Neg	NA	Neg	Neg	NA	Neg	Neg	Neg	Neg	0	0	0	0	Pos	Pos	0	0	2+	2+	NA	0	20/10/2015	NA	NA	Yes	40	Not ambiguous	Not ambiguous	5424	Neg	FALSE	N	Fixed	FALSE	0	0	0	0	0	0	1	1	Neg	Neg	Neg	Neg	Neg
L933	HS NKARA	No	Neg	NA	Neg	Neg	NA	Pos	Pos	Pos	Pos	0	0	2+	2+	Pos	Pos	2+	2+	2+	2+	NA	0	09/10/2015	NA	NA	Yes	7	Not ambiguous	Not ambiguous	5437	Neg	FALSE	L	Fixed	FALSE	0	0	1	1	1	1	1	1	Neg	Neg	Pos	Pos	Pos
L912	HS NKARA	No	Neg	NA	Neg	Neg	NA	Pos	Pos	Pos	Pos	2+	2+	0	0	Pos	Pos	2+	2+	0	0	NA	0	08/10/2015	NA	NA	Yes	7	Not ambiguous	Not ambiguous	5441	Neg	FALSE	L	Fixed	FALSE	1	1	0	0	1	1	0	0	Pos	Pos	Neg	Neg	Pos
L895	HS NKARA	No	Neg	NA	Neg	Neg	NA	Neg	Neg	Pos	Pos	2+	2+	1+	1+	Neg	Neg	0	0	0	0	NA	0	07/10/2015	NA	NA	Yes	53	Not ambiguous	Not ambiguous	5443	Neg	FALSE	L	Fixed	FALSE	1	1	1	1	0	0	0	0	Pos	Pos	Pos	Pos	Neg
L888	HS NKARA	No	Neg	NA	Neg	Neg	NA	Neg	Neg	Neg	Neg	0	0	0	0	Pos	Pos	2+	2+	2+	2+	NA	0	07/10/2015	NA	NA	Yes	37	Not ambiguous	Not ambiguous	5445	Neg	FALSE	L	Fixed	FALSE	0	0	0	0	1	1	1	1	Neg	Neg	Neg	Neg	Pos
L881	HS NKARA	No	Neg	NA	Neg	Neg	NA	Neg	Neg	Neg	Neg	0	0	0	0	Pos	Pos	0	0	1+	1+	NA	0	06/10/2015	NA	NA	Yes	56	Not ambiguous	Not ambiguous	5447	Neg	FALSE	L	Fixed	FALSE	0	0	0	0	0	0	1	1	Neg	Neg	Neg	Neg	Neg
L879	HS NKARA	No	Neg	NA	Neg	Neg	NA	Neg	Neg	Neg	Neg	0	0	0	0	Pos	Pos	1+	1+	0	0	NA	0	06/10/2015	NA	NA	Yes	19	Not ambiguous	Not ambiguous	5449	Neg	FALSE	L	Fixed	FALSE	0	0	0	0	1	1	0	0	Neg	Neg	Neg	Neg	Pos
L878	HS NKARA	No	Neg	NA	Neg	Neg	NA	Pos	Pos	Neg	Neg	0	0	0	0	Pos	Pos	2+	2+	2+	2+	NA	0	06/10/2015	NA	NA	Yes	65	Not ambiguous	Not ambiguous	5451	Neg	FALSE	L	Fixed	FALSE	0	0	0	0	1	1	1	1	Neg	Neg	Neg	Neg	Pos
P961	HGR/MASIMANIMBA	No	Neg	NA	Neg	Neg	NA	Pos	Pos	Pos	Pos	2+	2+	0	0	Neg	Neg	0	0	0	0	NA	0	19/10/2015	NA	NA	Yes	19	Ambiguous	Ambiguous	5453	Neg	FALSE	P	Fixed	FALSE	1	1	0	0	0	0	0	0	Pos	Pos	Neg	Neg	Neg
P956	HGR/MASIMANIMBA	No	Neg	NA	Neg	Neg	NA	Pos	Pos	Neg	Neg	0	0	0	0	Pos	Pos	0	0	2+	2+	NA	0	19/10/2015	NA	NA	Yes	25	Not ambiguous	Not ambiguous	5455	Neg	FALSE	P	Fixed	FALSE	0	0	0	0	0	0	1	1	Neg	Neg	Neg	Neg	Neg
P988	HGR/MASIMANIMBA	No	NA	Neg	NA	NA	Pos	Pos	Pos	Pos	Pos	1+	1+	1+	1+	Pos	Pos	2+	2+	3+	3+	NA	0	23/10/2015	99	4	Yes	28	Not ambiguous	Not ambiguous	5457	Pos	TRUE	P	Fixed	FALSE	1	1	1	1	1	1	1	1	Pos	Pos	Pos	Pos	Pos
P982	HGR/MASIMANIMBA	No	Pos	Pos	NA	NA	NA	Pos	Pos	Pos	Pos	3+	3+	1+	1+	Pos	Pos	2+	1+	1+	2+	NA	0	21/10/2015	NA	110	Yes	56	Not ambiguous	Not ambiguous	5460	Pos	TRUE	P	Fixed	FALSE	1	1	1	1	1	1	1	1	Pos	Pos	Pos	Pos	Pos
L1052	HS NKARA	No	Neg	NA	Neg	Neg	NA	Neg	Neg	Neg	Neg	0	0	0	0	Pos	Pos	0	0	2+	2+	NA	0	19/10/2015	NA	NA	Yes	56	Not ambiguous	Not ambiguous	5463	Neg	FALSE	L	Fixed	FALSE	0	0	0	0	0	0	1	1	Neg	Neg	Neg	Neg	Neg
L961	HS NKARA	No	Neg	NA	Neg	Neg	NA	Neg	Neg	Neg	Neg	0	0	0	0	Pos	Pos	0	0	2+	2+	NA	0	10/10/2015	NA	NA	Yes	15	Not ambiguous	Not ambiguous	5466	Neg	FALSE	L	Fixed	FALSE	0	0	0	0	0	0	1	1	Neg	Neg	Neg	Neg	Neg
L960	HS NKARA	No	Neg	NA	Neg	Neg	NA	Neg	Neg	Pos	Pos	2+	2+	0	0	Neg	Neg	0	0	0	0	NA	0	10/10/2015	NA	NA	Yes	10	Not ambiguous	Not ambiguous	5469	Neg	FALSE	L	Fixed	FALSE	1	1	0	0	0	0	0	0	Pos	Pos	Neg	Neg	Neg
L950	HS NKARA	No	Neg	NA	Neg	Neg	NA	Neg	Neg	Pos	Pos	2+	2+	0	0	Neg	Neg	0	0	0	0	NA	0	10/10/2015	NA	NA	Yes	24	Not ambiguous	Not ambiguous	5472	Neg	FALSE	L	Fixed	FALSE	1	1	0	0	0	0	0	0	Pos	Pos	Neg	Neg	Neg
L923	HS NKARA	No	Neg	NA	Neg	Neg	NA	Neg	Neg	Neg	Neg	0	0	0	0	Pos	Pos	0	0	1+	1+	NA	0	08/10/2015	NA	NA	Yes	61	Not ambiguous	Not ambiguous	5476	Neg	FALSE	L	Fixed	FALSE	0	0	0	0	0	0	1	1	Neg	Neg	Neg	Neg	Neg
L871	HS NKARA	No	Neg	NA	Neg	Neg	NA	Neg	Neg	Neg	Neg	0	0	0	0	Pos	Pos	1+	2+	0	0	NA	0	05/10/2015	NA	NA	Yes	0	Not ambiguous	Not ambiguous	5478	Neg	FALSE	L	Fixed	FALSE	0	0	0	0	1	1	0	0	Neg	Neg	Neg	Neg	Pos
N1105	MASAMUNA	No	Neg	NA	Neg	Neg	NA	Neg	Neg	Pos	Pos	1+	1+	0	0	Neg	Neg	0	0	0	0	NA	0	20/10/2015	2	NA	Yes	17	Not ambiguous	Not ambiguous	5482	Neg	FALSE	N	Fixed	FALSE	1	1	0	0	0	0	0	0	Pos	Pos	Neg	Neg	Neg
N1135	MASAMUNA	No	Neg	NA	Neg	Neg	NA	Neg	Neg	Pos	Pos	1+	1+	0	0	Pos	Pos	0	0	1+	1+	NA	0	24/10/2015	2	NA	Yes	25	Not ambiguous	Not ambiguous	5485	Neg	FALSE	N	Fixed	FALSE	1	1	0	0	0	0	1	1	Pos	Pos	Neg	Neg	Neg
N1137	MASAMUNA	No	Neg	NA	Neg	Neg	NA	Neg	Neg	Pos	Pos	2+	2+	2+	2+	Neg	Neg	0	0	0	0	NA	0	26/10/2015	NA	NA	Yes	6	Not ambiguous	Not ambiguous	5488	Neg	FALSE	N	Fixed	FALSE	1	1	1	1	0	0	0	0	Pos	Pos	Pos	Pos	Neg
N1156	MASAMUNA	No	Neg	NA	Neg	Neg	NA	Neg	Neg	Neg	Neg	0	0	0	0	Pos	Pos	2+	2+	2+	2+	NA	0	26/10/2015	NA	NA	Yes	28	Not ambiguous	Not ambiguous	5491	Neg	FALSE	N	Fixed	FALSE	0	0	0	0	1	1	1	1	Neg	Neg	Neg	Neg	Pos
N1158	MASAMUNA	No	Neg	NA	Neg	Neg	NA	Neg	Neg	Neg	Neg	0	0	0	0	Neg	Neg	0	0	0	0	NA	0	27/10/2015	NA	NA	Yes	29	Not ambiguous	Not ambiguous	5494	Neg	FALSE	N	Fixed	FALSE	0	0	0	0	0	0	0	0	Neg	Neg	Neg	Neg	Neg
N1167	MASAMUNA	No	Neg	NA	Neg	Neg	NA	Neg	Neg	Pos	Pos	1+	1+	1+	1+	Pos	Pos	2+	2+	2+	2+	NA	0	27/10/2015	2	NA	Yes	23	Not ambiguous	Not ambiguous	5498	Neg	FALSE	N	Fixed	FALSE	1	1	1	1	1	1	1	1	Pos	Pos	Pos	Pos	Pos
L969	HS NKARA	No	Neg	NA	Neg	Neg	NA	Neg	Neg	Neg	Neg	0	0	0	0	Pos	Pos	1+	1+	0	0	NA	0	10/10/2015	NA	NA	Yes	20	Not ambiguous	Not ambiguous	5501	Neg	FALSE	L	Fixed	FALSE	0	0	0	0	1	1	0	0	Neg	Neg	Neg	Neg	Pos
L977	HS NKARA	No	Neg	NA	Neg	Neg	NA	Neg	Neg	Pos	Pos	2+	2+	0	0	Neg	Neg	0	0	0	0	NA	0	12/10/2015	NA	NA	Yes	6	Not ambiguous	Not ambiguous	5503	Neg	FALSE	L	Fixed	FALSE	1	1	0	0	0	0	0	0	Pos	Pos	Neg	Neg	Neg
L980	HS NKARA	No	Neg	NA	Neg	Neg	NA	Neg	Neg	Pos	Pos	2+	2+	0	0	Neg	Neg	0	0	0	0	NA	0	12/10/2015	NA	NA	Yes	59	Not ambiguous	Not ambiguous	5506	Neg	FALSE	L	Fixed	FALSE	1	1	0	0	0	0	0	0	Pos	Pos	Neg	Neg	Neg
L987	HS NKARA	No	Neg	NA	Neg	Neg	NA	Pos	Pos	Neg	Neg	0	0	0	0	Pos	Pos	2+	2+	2+	2+	NA	0	13/10/2015	NA	NA	Yes	55	Not ambiguous	Not ambiguous	5509	Neg	FALSE	L	Fixed	FALSE	0	0	0	0	1	1	1	1	Neg	Neg	Neg	Neg	Pos
L988	HS NKARA	No	Neg	NA	Neg	Neg	NA	Neg	Neg	Pos	Pos	0	0	2+	2+	Pos	Pos	0	0	2+	2+	NA	0	13/10/2015	NA	NA	Yes	65	Not ambiguous	Not ambiguous	5512	Neg	FALSE	L	Fixed	FALSE	0	0	1	1	0	0	1	1	Neg	Neg	Pos	Pos	Neg
L997	HS NKARA	No	Neg	NA	Neg	Neg	NA	Neg	Neg	Pos	Pos	1+	1+	0	0	Neg	Neg	0	0	0	0	NA	0	14/10/2015	2	NA	Yes	68	Not ambiguous	Not ambiguous	5515	Neg	FALSE	L	Fixed	FALSE	1	1	0	0	0	0	0	0	Pos	Pos	Neg	Neg	Neg
L1006	HS NKARA	No	Neg	NA	Neg	Neg	NA	Neg	Neg	Neg	Neg	0	0	0	0	Pos	Pos	0	0	2+	2+	NA	0	15/10/2015	NA	NA	Yes	16	Not ambiguous	Not ambiguous	5522	Neg	FALSE	L	Fixed	FALSE	0	0	0	0	0	0	1	1	Neg	Neg	Neg	Neg	Neg
L1032	HS NKARA	No	Neg	NA	Neg	Neg	NA	Neg	Neg	Pos	Pos	1+	1+	0	0	Pos	Pos	0	0	2+	2+	NA	0	17/10/2015	1	NA	Yes	33	Not ambiguous	Not ambiguous	5525	Neg	FALSE	L	Fixed	FALSE	1	1	0	0	0	0	1	1	Pos	Pos	Neg	Neg	Neg
L1036	HS NKARA	No	Neg	NA	Neg	Neg	NA	Neg	Neg	Pos	Pos	0	0	1+	1+	Pos	Pos	0	0	1+	1+	NA	0	19/10/2015	NA	NA	Yes	35	Not ambiguous	Not ambiguous	5528	Neg	FALSE	L	Fixed	FALSE	0	0	1	1	0	0	1	1	Neg	Neg	Pos	Pos	Neg
L1037	HS NKARA	No	Neg	NA	Neg	Neg	NA	Neg	Neg	Pos	Pos	1+	1+	0	0	Neg	Neg	0	0	0	0	NA	0	19/10/2015	1	NA	Yes	10	Not ambiguous	Not ambiguous	5532	Neg	FALSE	L	Fixed	FALSE	1	1	0	0	0	0	0	0	Pos	Pos	Neg	Neg	Neg
L1040	HS NKARA	No	Neg	NA	Neg	Neg	NA	Neg	Neg	Pos	Pos	2+	2+	1+	1+	Pos	Pos	1+	1+	0	0	NA	0	19/10/2015	NA	NA	Yes	38	Not ambiguous	Not ambiguous	5538	Neg	FALSE	L	Fixed	FALSE	1	1	1	1	1	1	0	0	Pos	Pos	Pos	Pos	Pos
L1043	HS NKARA	No	Neg	NA	Neg	Neg	NA	Neg	Neg	Neg	Neg	0	0	0	0	Pos	Pos	0	0	2+	2+	NA	0	19/10/2015	NA	NA	Yes	10	Not ambiguous	Not ambiguous	5541	Neg	FALSE	L	Fixed	FALSE	0	0	0	0	0	0	1	1	Neg	Neg	Neg	Neg	Neg
P594	HGR/MASI	No	Neg	Neg	Neg	Pos	NA	Pos	Pos	Neg	Neg	0	0	0	0	Pos	Pos	4+	4+	1+	1+	NA	0	27/08/2015	NA	19	Yes	41	Not ambiguous	Not ambiguous	5555	Pos	TRUE	P	Fixed	FALSE	0	0	0	0	1	1	1	1	Neg	Neg	Neg	Neg	Pos
F580	HGR/KWAMOUTH	No	NA	Neg	NA	NA	Pos	Pos	Pos	Neg	Neg	0	0	0	0	Pos	Pos	0	0	1+	1+	NA	0	08/09/2015	NA	6	Yes	26	Not ambiguous	Not ambiguous	5563	Pos	TRUE	F	Fixed	FALSE	0	0	0	0	0	0	1	1	Neg	Neg	Neg	Neg	Neg
F558	HGR/KWAMOUTH	No	Neg	NA	Neg	Neg	NA	Neg	Neg	Neg	Neg	0	0	0	0	Pos	Pos	0	0	1+	1+	NA	0	05/09/2015	NA	NA	Yes	39	Not ambiguous	Not ambiguous	5565	Neg	FALSE	F	Fixed	FALSE	0	0	0	0	0	0	1	1	Neg	Neg	Neg	Neg	Neg
F681	HGR/KWAMOUTH	No	Neg	NA	Neg	Neg	NA	Neg	Neg	Neg	Neg	0	0	0	0	Pos	Pos	0	0	1+	1+	NA	0	16/09/2015	NA	NA	Yes	3	Not ambiguous	Not ambiguous	5567	Neg	FALSE	F	Fixed	FALSE	0	0	0	0	0	0	1	1	Neg	Neg	Neg	Neg	Neg
F574	HGR/KWAMOUTH	No	Neg	NA	Neg	Neg	NA	Neg	Neg	Neg	Neg	0	0	0	0	Pos	Pos	0	0	1+	1+	NA	0	07/09/2015	NA	NA	Yes	17	Not ambiguous	Not ambiguous	5569	Neg	FALSE	F	Fixed	FALSE	0	0	0	0	0	0	1	1	Neg	Neg	Neg	Neg	Neg
F685	HGR/KWAMOUTH	No	Neg	NA	Neg	Neg	NA	Neg	Neg	Pos	Pos	2+	1+	2+	1+	Pos	Pos	0	0	1+	1+	NA	0	16/09/2015	NA	NA	Yes	49	Not ambiguous	Not ambiguous	5571	Neg	FALSE	F	Fixed	FALSE	1	1	1	1	0	0	1	1	Pos	Pos	Pos	Pos	Neg
F584	HGR/KWAMOUTH	No	Neg	NA	Neg	Neg	NA	Pos	Pos	Neg	Neg	0	0	0	0	Neg	Neg	0	0	0	0	NA	0	08/09/2015	NA	NA	Yes	1	Not ambiguous	Not ambiguous	5573	Neg	FALSE	F	Fixed	FALSE	0	0	0	0	0	0	0	0	Neg	Neg	Neg	Neg	Neg
F726	HGR/KWAMOUTH	No	Neg	NA	Neg	Neg	NA	Neg	Neg	Pos	Pos	0	0	1+	1+	Pos	Pos	0	0	1+	1+	NA	0	19/09/2015	NA	NA	Yes	7	Not ambiguous	Not ambiguous	5575	Neg	FALSE	F	Fixed	FALSE	0	0	1	1	0	0	1	1	Neg	Neg	Pos	Pos	Neg
F600	HGR/KWAMOUTH	No	Neg	NA	Neg	Neg	NA	Neg	Neg	Neg	Neg	0	0	0	0	Pos	Pos	1+	1+	0	0	NA	0	09/09/2015	NA	NA	Yes	44	Not ambiguous	Not ambiguous	5577	Neg	FALSE	F	Fixed	FALSE	0	0	0	0	1	1	0	0	Neg	Neg	Neg	Neg	Pos
F733	HGR/KWAMOUTH	No	Neg	NA	Neg	Neg	NA	Neg	Neg	Neg	Neg	0	0	0	0	Pos	Pos	1+	1+	0	0	NA	0	21/09/2015	NA	NA	Yes	23	Not ambiguous	Not ambiguous	5579	Neg	FALSE	F	Fixed	FALSE	0	0	0	0	1	1	0	0	Neg	Neg	Neg	Neg	Pos
F645	HGR/KWAMOUTH	No	Neg	NA	Neg	Neg	NA	Pos	Pos	Pos	Pos	1+	1+	1+	1+	Pos	Pos	1+	1+	0	0	NA	0	12/09/2015	99	NA	Yes	44	Not ambiguous	Not ambiguous	5581	Neg	FALSE	F	Fixed	FALSE	1	1	1	1	1	1	0	0	Pos	Pos	Pos	Pos	Pos
F653	HGR/KWAMOUTH	No	Neg	NA	Neg	Neg	NA	Neg	Neg	Neg	Neg	0	0	0	0	Pos	Pos	0	0	1+	1+	NA	0	14/09/2015	NA	NA	Yes	27	Not ambiguous	Not ambiguous	5583	Neg	FALSE	F	Fixed	FALSE	0	0	0	0	0	0	1	1	Neg	Neg	Neg	Neg	Neg
F590	HGR/KWAMOUTH	No	Neg	NA	Neg	Neg	NA	Neg	Neg	Pos	Pos	1+	1+	0	0	Neg	Neg	0	0	0	0	NA	0	09/09/2015	99	NA	Yes	59	Not ambiguous	Not ambiguous	5585	Neg	FALSE	F	Fixed	FALSE	1	1	0	0	0	0	0	0	Pos	Pos	Neg	Neg	Neg
F762	HGR/KWAMOUTH	No	Neg	NA	Neg	Neg	NA	Neg	Neg	Neg	Neg	0	0	0	0	Pos	Pos	0	0	1+	1+	NA	0	22/09/2015	NA	NA	Yes	36	Not ambiguous	Not ambiguous	5588	Neg	FALSE	F	Fixed	FALSE	0	0	0	0	0	0	1	1	Neg	Neg	Neg	Neg	Neg
F784	HGR/KWAMOUTH	No	Neg	NA	Neg	Neg	NA	Neg	Neg	Neg	Neg	0	0	0	0	Pos	Pos	0	0	1+	1+	NA	0	23/09/2015	NA	NA	Yes	47	Not ambiguous	Not ambiguous	5590	Neg	FALSE	F	Fixed	FALSE	0	0	0	0	0	0	1	1	Neg	Neg	Neg	Neg	Neg
F799	HGR/KWAMOUTH	No	Neg	NA	Neg	Neg	NA	Neg	Neg	Neg	Neg	0	0	0	0	Pos	Pos	0	0	1+	1+	NA	0	24/09/2015	NA	NA	Yes	1	Not ambiguous	Not ambiguous	5593	Neg	FALSE	F	Fixed	FALSE	0	0	0	0	0	0	1	1	Neg	Neg	Neg	Neg	Neg
F800	HGR/KWAMOUTH	No	Neg	NA	Neg	Neg	NA	Neg	Neg	Neg	Neg	0	0	0	0	Pos	Pos	0	0	1+	1+	NA	0	24/09/2015	NA	NA	Yes	36	Not ambiguous	Not ambiguous	5598	Neg	FALSE	F	Fixed	FALSE	0	0	0	0	0	0	1	1	Neg	Neg	Neg	Neg	Neg
F801	HGR/KWAMOUTH	No	Neg	NA	Neg	Neg	NA	Neg	Neg	Neg	Neg	0	0	0	0	Pos	Pos	1+	1+	0	0	NA	0	24/09/2015	NA	NA	Yes	43	Not ambiguous	Not ambiguous	5601	Neg	FALSE	F	Fixed	FALSE	0	0	0	0	1	1	0	0	Neg	Neg	Neg	Neg	Pos
N1351	MASAMUNA	No	Neg	Pos	Neg	Pos	NA	Pos	Pos	Pos	Pos	2+	2+	2+	2+	Pos	Pos	2+	2+	2+	2+	NA	0	18/11/2015	NA	193	Yes	7	Not ambiguous	Not ambiguous	5614	Pos	TRUE	N	Fixed	FALSE	1	1	1	1	1	1	1	1	Pos	Pos	Pos	Pos	Pos
N1352	MASAMUNA	No	Neg	NA	Neg	Neg	NA	Neg	Neg	Neg	Neg	0	0	0	0	Pos	Pos	2+	2+	2+	2+	NA	0	18/11/2015	NA	NA	Yes	3	Not ambiguous	Not ambiguous	5616	Neg	FALSE	N	Fixed	FALSE	0	0	0	0	1	1	1	1	Neg	Neg	Neg	Neg	Pos
N1411	MASAMUNA	No	Neg	Neg	Neg	Pos	NA	Pos	Pos	Pos	Pos	1+	1+	2+	2+	Pos	Pos	2+	2+	2+	2+	NA	0	21/11/2015	1	4	Yes	6	Not ambiguous	Not ambiguous	5618	Pos	TRUE	N	Fixed	FALSE	1	1	1	1	1	1	1	1	Pos	Pos	Pos	Pos	Pos
N1429	MASAMUNA	No	Neg	NA	Neg	Neg	NA	Neg	Neg	Pos	Pos	1+	1+	1+	1+	Neg	Neg	0	0	0	0	NA	0	23/11/2015	1	NA	Yes	40	Not ambiguous	Not ambiguous	5620	Neg	FALSE	N	Fixed	FALSE	1	1	1	1	0	0	0	0	Pos	Pos	Pos	Pos	Neg
N1428	MASAMUNA	No	Neg	NA	Neg	Neg	NA	Neg	Neg	Neg	Neg	0	0	0	0	Pos	Pos	0	0	2+	2+	NA	0	23/11/2015	NA	NA	Yes	26	Not ambiguous	Not ambiguous	5624	Neg	FALSE	N	Fixed	FALSE	0	0	0	0	0	0	1	1	Neg	Neg	Neg	Neg	Neg
N1534	MASAMUNA	No	Neg	NA	Neg	Neg	NA	Neg	Neg	Neg	Neg	0	0	0	0	Pos	Pos	2+	2+	2+	2+	NA	0	01/12/2015	NA	NA	Yes	32	Not ambiguous	Not ambiguous	5626	Neg	FALSE	N	Fixed	FALSE	0	0	0	0	1	1	1	1	Neg	Neg	Neg	Neg	Pos
N1558	MASAMUNA	No	Neg	NA	Neg	Neg	NA	Pos	Pos	Pos	Pos	2+	2+	1+	1+	Neg	Neg	0	0	0	0	NA	0	02/12/2015	NA	NA	Yes	39	Ambiguous	Ambiguous	5628	Neg	FALSE	N	Fixed	FALSE	1	1	1	1	0	0	0	0	Pos	Pos	Pos	Pos	Neg
N1577	MASAMUNA	No	Neg	NA	Neg	Neg	NA	Neg	Neg	Neg	Neg	0	0	0	0	Pos	Pos	2+	2+	0	0	NA	0	04/12/2015	NA	NA	Yes	39	Not ambiguous	Not ambiguous	5630	Neg	FALSE	N	Fixed	FALSE	0	0	0	0	1	1	0	0	Neg	Neg	Neg	Neg	Pos
N1322	MASAMUNA	No	Neg	NA	Neg	Neg	NA	Neg	Neg	Neg	Neg	0	0	0	0	Pos	Pos	0	0	2+	2+	NA	0	16/11/2015	NA	NA	Yes	7	Not ambiguous	Not ambiguous	5632	Neg	FALSE	N	Fixed	FALSE	0	0	0	0	0	0	1	1	Neg	Neg	Neg	Neg	Neg
N1300	MASAMUNA	No	Neg	NA	Neg	Neg	NA	Neg	Neg	Neg	Neg	0	0	0	0	Pos	Pos	0	0	2+	2+	NA	0	12/11/2015	NA	NA	Yes	60	Not ambiguous	Not ambiguous	5634	Neg	FALSE	N	Fixed	FALSE	0	0	0	0	0	0	1	1	Neg	Neg	Neg	Neg	Neg
P1071	HGR/MASIMANIMBA	No	Neg	Pos	Pos	Pos	Neg	Pos	Pos	Pos	Pos	2+	1+	2+	2+	Pos	Pos	2+	2+	2+	3+	NA	0	13/11/2015	NA	1128	Yes	48	Not ambiguous	Not ambiguous	5637	Pos	TRUE	P	Fixed	FALSE	1	1	1	1	1	1	1	1	Pos	Pos	Pos	Pos	Pos
N1546	MASAMUNA	No	Neg	NA	Neg	Neg	NA	Neg	Neg	Pos	Pos	1+	1+	1+	1+	Neg	Neg	0	0	0	0	NA	0	02/12/2015	1	NA	Yes	9	Not ambiguous	Not ambiguous	5640	Neg	FALSE	N	Fixed	FALSE	1	1	1	1	0	0	0	0	Pos	Pos	Pos	Pos	Neg
P1080	HGR/MASIMANIMBA	Yes	Neg	Pos	Neg	Pos	Neg	Pos	Pos	Neg	Neg	0	0	0	0	Pos	Pos	1+	1+	1+	1+	NA	0	17/11/2015	NA	164	Yes	7	Not ambiguous	Not ambiguous	5643	Pos	TRUE	P	Fixed	FALSE	0	0	0	0	1	1	1	1	Neg	Neg	Neg	Neg	Pos
P1185	HGR/MASIMANIMBA	Yes	Neg	Pos	Neg	Neg	NA	Pos	Pos	Neg	Neg	0	0	0	0	Pos	Pos	2+	2+	3+	3+	NA	0	03/12/2015	NA	320	Yes	25	Not ambiguous	Not ambiguous	5647	Pos	TRUE	P	Fixed	FALSE	0	0	0	0	1	1	1	1	Neg	Neg	Neg	Neg	Pos
P1199	HGR/MASIMANIMBA	No	Neg	Neg	Neg	Pos	Neg	Pos	Pos	Neg	Neg	0	0	0	0	Pos	Pos	1+	1+	3+	3+	NA	0	04/12/2015	NA	3	Yes	42	Not ambiguous	Not ambiguous	5659	Pos	TRUE	P	Fixed	FALSE	0	0	0	0	1	1	1	1	Neg	Neg	Neg	Neg	Pos
P1010	HGR/MASIMANIMBA	No	Neg	NA	Neg	Neg	Neg	Pos	Pos	Pos	Pos	2+	2+	2+	2+	Pos	Pos	4+	4+	3+	3+	NA	0	27/10/2015	NA	NA	Yes	29	Not ambiguous	Not ambiguous	5661	Neg	FALSE	P	Fixed	FALSE	1	1	1	1	1	1	1	1	Pos	Pos	Pos	Pos	Pos
P1083	HGR/MASIMANIMBA	No	Neg	NA	Neg	Neg	NA	Pos	Pos	Pos	Pos	2+	2+	0	2+	Pos	Pos	1+	2+	1+	1+	NA	0	17/11/2015	NA	NA	Yes	65	Not ambiguous	Not ambiguous	5663	Neg	FALSE	P	Fixed	FALSE	1	1	0	1	1	1	1	1	Pos	Pos	Neg	Pos	Pos
P1085	HGR/MASIMANIMBA	No	Neg	NA	Neg	Neg	NA	Neg	Neg	Pos	Pos	1+	1+	3+	3+	Pos	Pos	0	0	4+	4+	NA	0	17/11/2015	99	NA	Yes	42	Not ambiguous	Not ambiguous	5665	Neg	FALSE	P	Fixed	FALSE	1	1	1	1	0	0	1	1	Pos	Pos	Pos	Pos	Neg
P1148	HGR/MASIMANIMBA	No	Neg	NA	Neg	Neg	NA	Neg	Neg	Neg	Neg	0	0	0	0	Pos	Pos	1+	1+	3+	2+	NA	0	27/11/2015	NA	NA	Yes	27	Not ambiguous	Not ambiguous	5667	Neg	FALSE	P	Fixed	FALSE	0	0	0	0	1	1	1	1	Neg	Neg	Neg	Neg	Pos
P1088	HGR/MASIMANIMBA	No	Neg	NA	Neg	Neg	NA	Pos	Pos	Neg	Neg	0	0	0	0	Pos	Pos	0	0	4+	4+	NA	0	17/11/2015	NA	NA	Yes	50	Not ambiguous	Not ambiguous	5669	Neg	FALSE	P	Fixed	FALSE	0	0	0	0	0	0	1	1	Neg	Neg	Neg	Neg	Neg
P1123	HGR/MASIMANIMBA	No	Neg	NA	Neg	Neg	NA	Pos	Pos	Neg	Neg	0	0	0	0	Neg	Neg	0	0	0	0	NA	0	23/11/2015	NA	NA	Yes	18	Ambiguous	Ambiguous	5671	Neg	FALSE	P	Fixed	FALSE	0	0	0	0	0	0	0	0	Neg	Neg	Neg	Neg	Neg
P1139	HGR/MASIMANIMBA	No	Neg	NA	Neg	Neg	NA	Neg	Neg	Neg	Neg	0	0	0	0	Pos	Pos	0	0	2+	2+	NA	0	26/11/2015	NA	NA	Yes	21	Not ambiguous	Not ambiguous	5673	Neg	FALSE	P	Fixed	FALSE	0	0	0	0	0	0	1	1	Neg	Neg	Neg	Neg	Neg
P1145	HGR/MASIMANIMBA	No	Neg	NA	Neg	Neg	NA	Neg	Neg	Neg	Neg	0	0	0	0	Pos	Pos	0	0	1+	1+	NA	0	26/11/2015	NA	NA	Yes	30	Not ambiguous	Not ambiguous	5675	Neg	FALSE	P	Fixed	FALSE	0	0	0	0	0	0	1	1	Neg	Neg	Neg	Neg	Neg
P1147	HGR/MASIMANIMBA	No	Neg	NA	Neg	Neg	NA	Neg	Neg	Neg	Neg	0	0	0	0	Pos	Pos	0	0	1+	1+	NA	0	27/11/2015	NA	NA	Yes	16	Not ambiguous	Not ambiguous	5677	Neg	FALSE	P	Fixed	FALSE	0	0	0	0	0	0	1	1	Neg	Neg	Neg	Neg	Neg
P1162	HGR/MASIMANIMBA	No	Neg	NA	Neg	Neg	NA	Neg	Neg	Neg	Neg	0	0	0	0	Pos	Pos	0	0	1+	1+	NA	0	30/11/2015	NA	NA	Yes	30	Not ambiguous	Not ambiguous	5681	Neg	FALSE	P	Fixed	FALSE	0	0	0	0	0	0	1	1	Neg	Neg	Neg	Neg	Neg
L1152	HS NKARA	No	Neg	NA	Neg	Neg	NA	Neg	Neg	Neg	Neg	0	0	0	0	Pos	Pos	0	0	1+	1+	NA	0	29/10/2015	NA	NA	Yes	3	Not ambiguous	Not ambiguous	5690	Neg	FALSE	L	Fixed	FALSE	0	0	0	0	0	0	1	1	Neg	Neg	Neg	Neg	Neg
L1167	HS NKARA	No	Neg	NA	Neg	Neg	Neg	Pos	Pos	Neg	Neg	0	0	0	0	Neg	Neg	0	0	0	0	NA	0	01/11/2015	NA	NA	Yes	23	Not ambiguous	Not ambiguous	5693	Neg	FALSE	L	Fixed	FALSE	0	0	0	0	0	0	0	0	Neg	Neg	Neg	Neg	Neg
L1170	HS NKARA	No	Neg	NA	Neg	Neg	NA	Neg	Neg	Pos	Pos	1+	1+	0	0	Pos	Pos	0	0	2+	2+	NA	0	03/11/2015	25	NA	Yes	44	Not ambiguous	Not ambiguous	5697	Neg	FALSE	L	Fixed	FALSE	1	1	0	0	0	0	1	1	Pos	Pos	Neg	Neg	Neg
L1173	HS NKARA	No	Neg	NA	Neg	Neg	NA	Pos	Pos	Neg	Neg	0	0	0	0	Neg	Neg	0	0	0	0	NA	0	03/11/2015	NA	NA	Yes	56	Not ambiguous	Not ambiguous	5701	Neg	FALSE	L	Fixed	FALSE	0	0	0	0	0	0	0	0	Neg	Neg	Neg	Neg	Neg
L1178	HS NKARA	No	Neg	NA	Neg	Neg	NA	Neg	Neg	Pos	Pos	1+	1+	0	0	Neg	Neg	0	0	0	0	NA	0	03/11/2015	2	NA	Yes	8	Not ambiguous	Not ambiguous	5704	Neg	FALSE	L	Fixed	FALSE	1	1	0	0	0	0	0	0	Pos	Pos	Neg	Neg	Neg
L1181	HS NKARA	No	Neg	NA	Neg	Neg	NA	Neg	Neg	Pos	Pos	0	0	1+	1+	Pos	Pos	0	0	2+	2+	NA	0	04/11/2015	NA	NA	Yes	62	Not ambiguous	Not ambiguous	5711	Neg	FALSE	L	Fixed	FALSE	0	0	1	1	0	0	1	1	Neg	Neg	Pos	Pos	Neg
L1193	HS NKARA	No	Neg	NA	Neg	Neg	NA	Neg	Neg	Neg	Neg	0	0	0	0	Pos	Pos	0	0	1+	1+	NA	0	05/11/2015	NA	NA	Yes	3	Not ambiguous	Not ambiguous	5715	Neg	FALSE	L	Fixed	FALSE	0	0	0	0	0	0	1	1	Neg	Neg	Neg	Neg	Neg
L1194	HS NKARA	No	Neg	NA	Neg	Neg	NA	Neg	Neg	Neg	Neg	0	0	0	0	Pos	Pos	0	0	1+	1+	NA	0	05/11/2015	NA	NA	Yes	73	Not ambiguous	Not ambiguous	5719	Neg	FALSE	L	Fixed	FALSE	0	0	0	0	0	0	1	1	Neg	Neg	Neg	Neg	Neg
L1077	HS NKARA	No	Neg	Neg	Pos	Pos	NA	Neg	Neg	Pos	Pos	1+	1+	0	0	Neg	Neg	0	0	0	0	NA	0	21/10/2015	2	4	Yes	8	Not ambiguous	Not ambiguous	5722	Pos	TRUE	L	Fixed	FALSE	1	1	0	0	0	0	0	0	Pos	Pos	Neg	Neg	Neg
L1341	HS NKARA	No	Neg	Pos	Neg	Neg	NA	Neg	Neg	Pos	Pos	1+	1+	1+	1+	Neg	Neg	0	0	0	0	NA	0	24/11/2015	2	120	Yes	13	Not ambiguous	Not ambiguous	5725	Pos	TRUE	L	Fixed	FALSE	1	1	1	1	0	0	0	0	Pos	Pos	Pos	Pos	Neg
L1073	HS NKARA	No	Neg	NA	Neg	Neg	NA	Neg	Neg	Pos	Pos	0	0	2+	2+	Pos	Pos	2+	2+	0	0	NA	0	21/10/2015	NA	NA	Yes	26	Not ambiguous	Not ambiguous	5729	Neg	FALSE	L	Fixed	FALSE	0	0	1	1	1	1	0	0	Neg	Neg	Pos	Pos	Pos
L1380	HS NKARA	No	Pos	Pos	Neg	Pos	NA	Neg	Neg	Neg	Neg	0	0	0	0	Pos	Pos	0	0	2+	2+	NA	0	30/11/2015	NA	105	Yes	42	Not ambiguous	Not ambiguous	5731	Pos	TRUE	L	Fixed	FALSE	0	0	0	0	0	0	1	1	Neg	Neg	Neg	Neg	Neg
L1415	HS NKARA	No	Pos	Neg	Neg	Neg	NA	Neg	Neg	Pos	Pos	1+	1+	1+	1+	Neg	Neg	0	0	0	0	NA	0	03/12/2015	5	6	Yes	16	Not ambiguous	Not ambiguous	5734	Pos	TRUE	L	Fixed	FALSE	1	1	1	1	0	0	0	0	Pos	Pos	Pos	Pos	Neg
L1322	HS NKARA	No	Neg	NA	Neg	Neg	NA	Neg	Neg	Neg	Neg	0	0	0	0	Pos	Pos	0	0	2+	2+	NA	0	23/11/2015	NA	NA	Yes	54	Not ambiguous	Not ambiguous	5737	Neg	FALSE	L	Fixed	FALSE	0	0	0	0	0	0	1	1	Neg	Neg	Neg	Neg	Neg
L1067	HS NKARA	No	Neg	NA	Neg	Neg	NA	Neg	Neg	Pos	Pos	2+	2+	1+	1+	Neg	Neg	0	0	0	0	NA	0	21/10/2015	NA	NA	Yes	13	Not ambiguous	Not ambiguous	5740	Neg	FALSE	L	Fixed	FALSE	1	1	1	1	0	0	0	0	Pos	Pos	Pos	Pos	Neg
L1094	HS NKARA	No	Neg	NA	Neg	Neg	NA	Neg	Neg	Neg	Neg	0	0	0	0	Pos	Pos	1+	1+	0	0	NA	0	23/10/2015	NA	NA	Yes	7	Not ambiguous	Not ambiguous	5748	Neg	FALSE	L	Fixed	FALSE	0	0	0	0	1	1	0	0	Neg	Neg	Neg	Neg	Pos
L1096	HS NKARA	No	Neg	NA	Neg	Neg	NA	Neg	Neg	Pos	Pos	1+	1+	0	0	Neg	Neg	0	0	0	0	NA	0	23/10/2015	1	NA	Yes	53	Not ambiguous	Not ambiguous	5753	Neg	FALSE	L	Fixed	FALSE	1	1	0	0	0	0	0	0	Pos	Pos	Neg	Neg	Neg
L1098	HS NKARA	No	Neg	NA	Neg	Neg	NA	Neg	Neg	Neg	Neg	0	0	0	0	Pos	Pos	1+	1+	0	0	NA	0	23/10/2015	NA	NA	Yes	9	Not ambiguous	Not ambiguous	5757	Neg	FALSE	L	Fixed	FALSE	0	0	0	0	1	1	0	0	Neg	Neg	Neg	Neg	Pos
L1100	HS NKARA	No	Neg	NA	Neg	Neg	NA	Neg	Neg	Neg	Neg	0	0	0	0	Pos	Pos	1+	1+	0	0	NA	0	24/10/2015	NA	NA	Yes	2	Not ambiguous	Not ambiguous	5760	Neg	FALSE	L	Fixed	FALSE	0	0	0	0	1	1	0	0	Neg	Neg	Neg	Neg	Pos
L1102	HS NKARA	No	Neg	NA	Neg	Neg	NA	Neg	Neg	Pos	Pos	1+	1+	0	0	Neg	Neg	0	0	0	0	NA	0	24/10/2015	1	NA	Yes	45	Not ambiguous	Not ambiguous	5763	Neg	FALSE	L	Fixed	FALSE	1	1	0	0	0	0	0	0	Pos	Pos	Neg	Neg	Neg
L1103	HS NKARA	No	Neg	NA	Neg	Neg	NA	Neg	Neg	Pos	Pos	1+	1+	1+	1+	Neg	Neg	0	0	0	0	NA	0	24/10/2015	3	NA	Yes	8	Not ambiguous	Not ambiguous	5766	Neg	FALSE	L	Fixed	FALSE	1	1	1	1	0	0	0	0	Pos	Pos	Pos	Pos	Neg
L1104	HS NKARA	No	Neg	NA	Neg	Neg	NA	Neg	Neg	Pos	Pos	1+	1+	0	0	Neg	Neg	0	0	0	0	NA	0	24/10/2015	5	NA	Yes	5	Not ambiguous	Not ambiguous	5768	Neg	FALSE	L	Fixed	FALSE	1	1	0	0	0	0	0	0	Pos	Pos	Neg	Neg	Neg
L1107	HS NKARA	No	Neg	NA	Neg	Neg	NA	Neg	Neg	Pos	Pos	1+	1+	0	0	Neg	Neg	0	0	0	0	NA	0	24/10/2015	5	NA	Yes	25	Not ambiguous	Not ambiguous	5771	Neg	FALSE	L	Fixed	FALSE	1	1	0	0	0	0	0	0	Pos	Pos	Neg	Neg	Neg
L1137	HS NKARA	No	Neg	NA	Neg	Neg	NA	Pos	Pos	Pos	Pos	2+	2+	2+	2+	Neg	Neg	0	0	0	0	NA	0	28/10/2015	NA	NA	Yes	42	Not ambiguous	Not ambiguous	5774	Neg	FALSE	L	Fixed	FALSE	1	1	1	1	0	0	0	0	Pos	Pos	Pos	Pos	Neg
L1147	HS NKARA	No	Neg	NA	Neg	Neg	NA	Neg	Neg	Neg	Neg	0	0	0	0	Pos	Pos	2+	2+	2+	2+	NA	0	28/10/2015	NA	NA	Yes	22	Not ambiguous	Not ambiguous	5776	Neg	FALSE	L	Fixed	FALSE	0	0	0	0	1	1	1	1	Neg	Neg	Neg	Neg	Pos
P1174	HGR/MASIMANIMBA	No	Neg	NA	Neg	Neg	NA	Neg	Neg	Neg	Neg	0	0	0	0	Pos	Pos	3+	2+	0	0	NA	0	01/12/2015	NA	NA	Yes	53	Not ambiguous	Not ambiguous	5778	Neg	FALSE	P	Fixed	FALSE	0	0	0	0	1	1	0	0	Neg	Neg	Neg	Neg	Pos
P1182	HGR/MASIMANIMBA	No	Neg	NA	Neg	Neg	NA	Pos	Pos	Pos	Pos	1+	1+	0	0	Pos	Pos	0	0	2+	2+	NA	0	02/12/2015	99	NA	Yes	11	Ambiguous	Ambiguous	5781	Neg	FALSE	P	Fixed	FALSE	1	1	0	0	0	0	1	1	Pos	Pos	Neg	Neg	Neg
P1209	HGR/MASIMANIMBA	No	Neg	NA	Neg	Neg	NA	Neg	Neg	Neg	Neg	0	0	0	0	Pos	Pos	1+	1+	2+	2+	NA	0	07/12/2015	NA	NA	Yes	29	Not ambiguous	Not ambiguous	5784	Neg	FALSE	P	Fixed	FALSE	0	0	0	0	1	1	1	1	Neg	Neg	Neg	Neg	Pos
P1210	HGR/MASIMANIMBA	No	Neg	NA	Neg	Neg	NA	Neg	Neg	Pos	Pos	2+	1+	1+	2+	Neg	Neg	0	0	0	0	NA	0	07/12/2015	NA	NA	Yes	25	Not ambiguous	Not ambiguous	5786	Neg	FALSE	P	Fixed	FALSE	1	1	1	1	0	0	0	0	Pos	Pos	Pos	Pos	Neg
L1132	HS NKARA	No	Pos	Neg	NA	NA	NA	Neg	Neg	Neg	Neg	0	0	0	0	Pos	Pos	0	0	1+	1+	NA	0	28/10/2015	NA	2	Yes	19	Not ambiguous	Not ambiguous	5789	Pos	TRUE	L	Fixed	FALSE	0	0	0	0	0	0	1	1	Neg	Neg	Neg	Neg	Neg
P1132	HS NKARA	No	Pos	Neg	NA	NA	NA	Neg	Neg	Neg	Neg	0	0	0	0	Pos	Pos	0	0	1+	1+	NA	0	28/10/2015	NA	2	Yes	19	Not ambiguous	Not ambiguous	5796	Pos	TRUE	P	Fixed	FALSE	0	0	0	0	0	0	1	1	Neg	Neg	Neg	Neg	Neg
L1359	HS NKARA	No	Neg	NA	Neg	Neg	NA	Neg	Neg	Neg	Neg	0	0	0	0	Pos	Pos	1+	1+	0	0	NA	0	26/11/2015	NA	NA	Yes	42	Not ambiguous	Not ambiguous	5799	Neg	FALSE	L	Fixed	FALSE	0	0	0	0	1	1	0	0	Neg	Neg	Neg	Neg	Pos
L1159	HS NKARA	No	Neg	Neg	Pos	Pos	NA	Pos	Pos	Pos	Pos	2+	2+	0	0	Pos	Pos	2+	2+	2+	2+	NA	0	31/10/2015	NA	1	Yes	48	Not ambiguous	Not ambiguous	5801	Pos	TRUE	L	Fixed	FALSE	1	1	0	0	1	1	1	1	Pos	Pos	Neg	Neg	Pos
L1379	HS NKARA	No	Pos	Neg	Pos	Pos	NA	Neg	Neg	Pos	Pos	2+	2+	3+	3+	Pos	Pos	0	0	2+	2+	NA	0	30/11/2015	NA	92	Yes	65	Not ambiguous	Not ambiguous	5803	Pos	TRUE	L	Fixed	FALSE	1	1	1	1	0	0	1	1	Pos	Pos	Pos	Pos	Neg
L1172	HS NKARA	No	Neg	NA	Neg	Neg	NA	Pos	Pos	Neg	Neg	0	0	0	0	Neg	Neg	0	0	0	0	NA	0	03/11/2015	NA	NA	Yes	12	Not ambiguous	Not ambiguous	5805	Neg	FALSE	L	Fixed	FALSE	0	0	0	0	0	0	0	0	Neg	Neg	Neg	Neg	Neg
L1371	HS NKARA	No	Neg	NA	Neg	Neg	NA	Neg	Neg	Pos	Pos	1+	1+	0	0	Neg	Neg	0	0	0	0	NA	0	28/11/2015	5	NA	Yes	36	Not ambiguous	Not ambiguous	5807	Neg	FALSE	L	Fixed	FALSE	1	1	0	0	0	0	0	0	Pos	Pos	Neg	Neg	Neg
L1327	HS NKARA	No	Neg	NA	Neg	Neg	NA	Pos	Pos	Neg	Neg	0	0	0	0	Neg	Neg	0	0	0	0	NA	0	23/11/2015	NA	NA	Yes	18	Not ambiguous	Not ambiguous	5809	Neg	FALSE	L	Fixed	FALSE	0	0	0	0	0	0	0	0	Neg	Neg	Neg	Neg	Neg
L1381	HS NKARA	No	Neg	NA	Neg	Neg	NA	Neg	Neg	Neg	Neg	0	0	0	0	Pos	Pos	0	0	1+	1+	NA	0	30/11/2015	NA	NA	Yes	5	Not ambiguous	Not ambiguous	5811	Neg	FALSE	L	Fixed	FALSE	0	0	0	0	0	0	1	1	Neg	Neg	Neg	Neg	Neg
L1336	HS NKARA	No	Neg	NA	Neg	Neg	NA	Neg	Neg	Neg	Neg	0	0	0	0	Pos	Pos	0	0	2+	2+	NA	0	24/11/2015	NA	NA	Yes	49	Not ambiguous	Not ambiguous	5813	Neg	FALSE	L	Fixed	FALSE	0	0	0	0	0	0	1	1	Neg	Neg	Neg	Neg	Neg
L1382	HS NKARA	No	Neg	NA	Neg	Neg	NA	Neg	Neg	Neg	Neg	0	0	0	0	Pos	Pos	0	0	1+	1+	NA	0	30/11/2015	NA	NA	Yes	2	Not ambiguous	Not ambiguous	5815	Neg	FALSE	L	Fixed	FALSE	0	0	0	0	0	0	1	1	Neg	Neg	Neg	Neg	Neg
L1385	HS NKARA	No	Neg	NA	Neg	Neg	NA	Neg	Neg	Neg	Neg	0	0	0	0	Pos	Pos	0	0	2+	2+	NA	0	30/11/2015	NA	NA	Yes	16	Not ambiguous	Not ambiguous	5817	Neg	FALSE	L	Fixed	FALSE	0	0	0	0	0	0	1	1	Neg	Neg	Neg	Neg	Neg
L1393	HS NKARA	No	Neg	NA	Neg	Neg	NA	Neg	Neg	Pos	Pos	0	0	1+	1+	Neg	Neg	0	0	0	0	NA	0	30/11/2015	NA	NA	Yes	38	Not ambiguous	Not ambiguous	5819	Neg	FALSE	L	Fixed	FALSE	0	0	1	1	0	0	0	0	Neg	Neg	Pos	Pos	Neg
L1397	HS NKARA	No	Neg	NA	Neg	Neg	NA	Pos	Pos	Neg	Neg	0	0	0	0	Pos	Pos	0	0	2+	2+	NA	0	30/11/2015	NA	NA	Yes	7	Not ambiguous	Not ambiguous	5821	Neg	FALSE	L	Fixed	FALSE	0	0	0	0	0	0	1	1	Neg	Neg	Neg	Neg	Neg
L1400	HS NKARA	No	Neg	NA	Neg	Neg	NA	Neg	Neg	Neg	Neg	0	0	0	0	Pos	Pos	1+	1+	1+	1+	NA	0	01/12/2015	NA	NA	Yes	8	Not ambiguous	Not ambiguous	5823	Neg	FALSE	L	Fixed	FALSE	0	0	0	0	1	1	1	1	Neg	Neg	Neg	Neg	Pos
L1440	HS NKARA	No	Neg	NA	Neg	Neg	NA	Neg	Neg	Neg	Neg	0	0	0	0	Pos	Pos	0	0	1+	1+	NA	0	08/12/2015	NA	NA	Yes	27	Not ambiguous	Not ambiguous	5825	Neg	FALSE	L	Fixed	FALSE	0	0	0	0	0	0	1	1	Neg	Neg	Neg	Neg	Neg
L1405	HS NKARA	No	Neg	NA	Neg	Neg	NA	Neg	Neg	Neg	Neg	0	0	0	0	Pos	Pos	0	0	1+	1+	NA	0	02/12/2015	NA	NA	Yes	12	Not ambiguous	Not ambiguous	5827	Neg	FALSE	L	Fixed	FALSE	0	0	0	0	0	0	1	1	Neg	Neg	Neg	Neg	Neg
L1441	HS NKARA	No	Neg	NA	Neg	Neg	NA	Neg	Neg	Pos	Pos	1+	2+	0	0	Pos	Pos	0	0	1+	1+	NA	0	08/12/2015	5	NA	Yes	18	Not ambiguous	Not ambiguous	5829	Neg	FALSE	L	Fixed	FALSE	1	1	0	0	0	0	1	1	Pos	Pos	Neg	Neg	Neg
L1416	HS NKARA	No	Neg	NA	Neg	Neg	NA	Neg	Neg	Neg	Neg	0	0	0	0	Pos	Pos	1+	1+	1+	1+	NA	0	03/12/2015	NA	NA	Yes	62	Not ambiguous	Not ambiguous	5831	Neg	FALSE	L	Fixed	FALSE	0	0	0	0	1	1	1	1	Neg	Neg	Neg	Neg	Pos
L1157	HS NKARA	No	Neg	NA	Neg	Neg	NA	Neg	Neg	Neg	Neg	0	0	0	0	Pos	Pos	0	0	1+	1+	NA	0	31/10/2015	NA	NA	Yes	52	Not ambiguous	Not ambiguous	5833	Neg	FALSE	L	Fixed	FALSE	0	0	0	0	0	0	1	1	Neg	Neg	Neg	Neg	Neg
L1092	HS NKARA	No	Neg	NA	Neg	Neg	NA	Neg	Neg	Pos	Pos	2+	2+	3+	3+	Neg	Neg	0	0	0	0	NA	0	23/10/2015	NA	NA	Yes	24	Not ambiguous	Not ambiguous	5837	Neg	FALSE	L	Fixed	FALSE	1	1	1	1	0	0	0	0	Pos	Pos	Pos	Pos	Neg
L1323	HS NKARA	No	Neg	NA	Neg	Neg	NA	Pos	Pos	Neg	Neg	0	0	0	0	Pos	Pos	2+	2+	0	0	NA	0	23/11/2015	NA	NA	Yes	30	Not ambiguous	Not ambiguous	5839	Neg	FALSE	L	Fixed	FALSE	0	0	0	0	1	1	0	0	Neg	Neg	Neg	Neg	Pos
L1426	HS NKARA	No	Neg	NA	Neg	Neg	NA	Neg	Neg	Neg	Neg	0	0	0	0	Pos	Pos	1+	1+	2+	2+	NA	0	05/12/2015	NA	NA	Yes	8	Not ambiguous	Not ambiguous	5841	Neg	FALSE	L	Fixed	FALSE	0	0	0	0	1	1	1	1	Neg	Neg	Neg	Neg	Pos
L1325	HS NKARA	No	Neg	NA	Neg	Neg	NA	Neg	Neg	Pos	Pos	2+	2+	1+	1+	Neg	Neg	0	0	0	0	NA	0	23/11/2015	NA	NA	Yes	34	Not ambiguous	Not ambiguous	5843	Neg	FALSE	L	Fixed	FALSE	1	1	1	1	0	0	0	0	Pos	Pos	Pos	Pos	Neg
L1432	HS NKARA	No	Neg	NA	Neg	Neg	NA	Neg	Neg	Neg	Neg	0	0	0	0	Pos	Pos	2+	2+	1+	1+	NA	0	07/12/2015	NA	NA	Yes	27	Not ambiguous	Not ambiguous	5845	Neg	FALSE	L	Fixed	FALSE	0	0	0	0	1	1	1	1	Neg	Neg	Neg	Neg	Pos
L1436	HS NKARA	No	Neg	NA	Neg	Neg	NA	Neg	Neg	Neg	Neg	0	0	0	0	Pos	Pos	0	0	1+	1+	NA	0	08/12/2015	NA	NA	Yes	18	Not ambiguous	Not ambiguous	5847	Neg	FALSE	L	Fixed	FALSE	0	0	0	0	0	0	1	1	Neg	Neg	Neg	Neg	Neg
L1347	HS NKARA	No	Neg	NA	Neg	Neg	NA	Neg	Neg	Pos	Pos	1+	1+	2+	2+	Neg	Neg	0	0	0	0	NA	0	25/11/2015	3	NA	Yes	51	Not ambiguous	Not ambiguous	5849	Neg	FALSE	L	Fixed	FALSE	1	1	1	1	0	0	0	0	Pos	Pos	Pos	Pos	Neg
L1352	HS NKARA	No	Neg	NA	Neg	Neg	NA	Neg	Neg	Neg	Neg	0	0	0	0	Pos	Pos	1+	1+	0	0	NA	0	25/11/2015	NA	NA	Yes	52	Not ambiguous	Not ambiguous	5851	Neg	FALSE	L	Fixed	FALSE	0	0	0	0	1	1	0	0	Neg	Neg	Neg	Neg	Pos
A4674	UM/BDD	No	Neg	Neg	Pos	Neg	NA	Neg	Neg	Neg	Neg	0	0	0	0	Pos	Pos	2+	2+	0	0	NA	0	18/12/2015	NA	2	Yes	1	Not ambiguous	Not ambiguous	5881	Pos	TRUE	A	Mobile	FALSE	0	0	0	0	1	1	0	0	Neg	Neg	Neg	Neg	Pos
A4705	UM/BDD	No	NA	Neg	NA	NA	Pos	Neg	Neg	Pos	Pos	3+	2+	2+	2+	Neg	Neg	0	0	0	0	NA	0	19/12/2015	NA	2	Yes	10	Not ambiguous	Not ambiguous	5883	Pos	TRUE	A	Mobile	FALSE	1	1	1	1	0	0	0	0	Pos	Pos	Pos	Pos	Neg
A1542	UM/BDD	No	Neg	NA	Neg	Neg	NA	Pos	Pos	Neg	Neg	0	0	0	0	Neg	Neg	0	0	0	0	NA	0	14/12/2015	NA	NA	Yes	15	Not ambiguous	Not ambiguous	5885	Neg	FALSE	A	Mobile	FALSE	0	0	0	0	0	0	0	0	Neg	Neg	Neg	Neg	Neg
A1544	UM/BDD	No	Neg	NA	Neg	Neg	NA	Neg	Neg	Neg	Neg	0	0	0	0	Pos	Pos	3+	3+	0	0	NA	0	14/12/2015	NA	NA	Yes	16	Not ambiguous	Not ambiguous	5887	Neg	FALSE	A	Mobile	FALSE	0	0	0	0	1	1	0	0	Neg	Neg	Neg	Neg	Pos
A1554	UM/BDD	No	Neg	NA	Neg	Neg	NA	Neg	Neg	Neg	Neg	0	0	0	0	Pos	Pos	4+	3+	0	0	NA	0	14/12/2015	NA	NA	Yes	16	Not ambiguous	Not ambiguous	5889	Neg	FALSE	A	Mobile	FALSE	0	0	0	0	1	1	0	0	Neg	Neg	Neg	Neg	Pos
A1556	UM/BDD	No	Neg	NA	Neg	Neg	NA	Neg	Neg	Neg	Neg	0	0	0	0	Pos	Pos	0	0	2+	2+	NA	0	14/12/2015	NA	NA	Yes	18	Not ambiguous	Not ambiguous	5891	Neg	FALSE	A	Mobile	FALSE	0	0	0	0	0	0	1	1	Neg	Neg	Neg	Neg	Neg
A3986	UM/BDD	No	Neg	NA	Neg	Neg	NA	Neg	Neg	Pos	Pos	2+	2+	2+	2+	Neg	Neg	0	0	0	0	NA	0	16/12/2015	NA	NA	Yes	60	Not ambiguous	Not ambiguous	5893	Neg	FALSE	A	Mobile	FALSE	1	1	1	1	0	0	0	0	Pos	Pos	Pos	Pos	Neg
A3997	UM/BDD	No	Neg	NA	Neg	Neg	NA	Neg	Neg	Neg	Neg	0	0	0	0	Pos	Pos	0	0	2+	2+	NA	0	16/12/2015	NA	NA	Yes	33	Not ambiguous	Not ambiguous	5895	Neg	FALSE	A	Mobile	FALSE	0	0	0	0	0	0	1	1	Neg	Neg	Neg	Neg	Neg
A4000	UM/BDD	No	Neg	NA	Neg	Neg	NA	Neg	Neg	Neg	Neg	0	0	0	0	Neg	Pos	0	2+	0	0	NA	0	16/12/2015	NA	NA	Yes	15	Not ambiguous	Not ambiguous	5897	Neg	FALSE	A	Mobile	FALSE	0	0	0	0	0	1	0	0	Neg	Neg	Neg	Neg	Neg
A4001	UM/BDD	No	Neg	NA	Neg	Neg	NA	Neg	Neg	Neg	Neg	0	0	0	0	Pos	Pos	3+	3+	0	0	NA	0	16/12/2015	NA	NA	Yes	14	Not ambiguous	Not ambiguous	5899	Neg	FALSE	A	Mobile	FALSE	0	0	0	0	1	1	0	0	Neg	Neg	Neg	Neg	Pos
A4012	UM/BDD	No	Neg	NA	Neg	Neg	NA	Neg	Neg	Pos	Pos	2+	1+	2+	2+	Neg	Neg	0	0	0	0	NA	0	16/12/2015	NA	NA	Yes	5	Not ambiguous	Not ambiguous	5901	Neg	FALSE	A	Mobile	FALSE	1	1	1	1	0	0	0	0	Pos	Pos	Pos	Pos	Neg
A4061	UM/BDD	No	Neg	NA	Neg	Neg	NA	Neg	Neg	Neg	Neg	0	0	0	0	Pos	Pos	0	0	2+	2+	NA	0	16/12/2015	NA	NA	Yes	8	Not ambiguous	Not ambiguous	5903	Neg	FALSE	A	Mobile	FALSE	0	0	0	0	0	0	1	1	Neg	Neg	Neg	Neg	Neg
A4080	UM/BDD	No	Neg	NA	Neg	Neg	NA	Neg	Neg	Pos	Pos	2+	3+	2+	2+	Neg	Neg	0	0	0	0	NA	0	16/12/2015	NA	NA	Yes	12	Not ambiguous	Not ambiguous	5905	Neg	FALSE	A	Mobile	FALSE	1	1	1	1	0	0	0	0	Pos	Pos	Pos	Pos	Neg
A4098	UM/BDD	No	Neg	NA	Neg	Neg	NA	Pos	Pos	Neg	Neg	0	0	0	0	Neg	Neg	0	0	0	0	NA	0	16/12/2015	NA	NA	Yes	15	Not ambiguous	Not ambiguous	5907	Neg	FALSE	A	Mobile	FALSE	0	0	0	0	0	0	0	0	Neg	Neg	Neg	Neg	Neg
A4106	UM/BDD	No	Neg	NA	Neg	Neg	NA	Pos	Pos	Neg	Neg	0	0	0	0	Neg	Neg	0	0	0	0	NA	0	16/12/2015	NA	NA	Yes	10	Not ambiguous	Not ambiguous	5909	Neg	FALSE	A	Mobile	FALSE	0	0	0	0	0	0	0	0	Neg	Neg	Neg	Neg	Neg
A4114	UM/BDD	No	Neg	NA	Neg	Neg	NA	Neg	Neg	Neg	Neg	0	0	0	0	Pos	Pos	0	0	3+	3+	NA	0	16/12/2015	NA	NA	Yes	11	Not ambiguous	Not ambiguous	5911	Neg	FALSE	A	Mobile	FALSE	0	0	0	0	0	0	1	1	Neg	Neg	Neg	Neg	Neg
A4157	UM/BDD	No	Neg	NA	Neg	Neg	Neg	Neg	Neg	Neg	Neg	0	0	0	0	Pos	Pos	2+	2+	0	0	NA	0	16/12/2015	NA	NA	Yes	15	Not ambiguous	Not ambiguous	5913	Neg	FALSE	A	Mobile	FALSE	0	0	0	0	1	1	0	0	Neg	Neg	Neg	Neg	Pos
A4160	UM/BDD	No	Neg	NA	Neg	Neg	NA	Neg	Neg	Neg	Neg	0	0	0	0	Pos	Pos	3+	3+	3+	3+	NA	0	16/12/2015	NA	NA	Yes	12	Not ambiguous	Not ambiguous	5915	Neg	FALSE	A	Mobile	FALSE	0	0	0	0	1	1	1	1	Neg	Neg	Neg	Neg	Pos
A4184	UM/BDD	No	Neg	NA	Neg	Neg	NA	Neg	Neg	Neg	Neg	0	0	0	0	Pos	Pos	3+	3+	2+	0	NA	0	16/12/2015	NA	NA	Yes	11	Not ambiguous	Not ambiguous	5917	Neg	FALSE	A	Mobile	FALSE	0	0	0	0	1	1	1	0	Neg	Neg	Neg	Neg	Pos
A4192	UM/BDD	No	Neg	NA	Neg	Neg	NA	Neg	Neg	Pos	Pos	2+	3+	2+	2+	Neg	Neg	0	0	0	0	NA	0	16/12/2015	NA	NA	Yes	11	Not ambiguous	Not ambiguous	5919	Neg	FALSE	A	Mobile	FALSE	1	1	1	1	0	0	0	0	Pos	Pos	Pos	Pos	Neg
A4232	UM/BDD	No	Neg	NA	Neg	Neg	NA	Neg	Neg	Neg	Neg	0	0	0	0	Pos	Pos	0	0	4+	4+	NA	0	16/12/2015	NA	NA	Yes	29	Not ambiguous	Not ambiguous	5921	Neg	FALSE	A	Mobile	FALSE	0	0	0	0	0	0	1	1	Neg	Neg	Neg	Neg	Neg
A4237	UM/BDD	No	Neg	NA	Neg	Neg	NA	Pos	Pos	Neg	Neg	0	0	0	0	Neg	Neg	0	0	0	0	NA	0	16/12/2015	NA	NA	Yes	20	Not ambiguous	Not ambiguous	5923	Neg	FALSE	A	Mobile	FALSE	0	0	0	0	0	0	0	0	Neg	Neg	Neg	Neg	Neg
A4507	UM/BDD	No	Neg	NA	Neg	Neg	NA	Neg	Neg	Neg	Neg	0	0	0	0	Pos	Pos	3+	2+	0	0	NA	0	18/12/2015	NA	NA	Yes	14	Not ambiguous	Not ambiguous	5925	Neg	FALSE	A	Mobile	FALSE	0	0	0	0	1	1	0	0	Neg	Neg	Neg	Neg	Pos
A4527	UM/BDD	No	Neg	NA	Neg	Neg	NA	Neg	Neg	Neg	Neg	0	0	0	0	Pos	Pos	4+	3+	0	0	NA	0	18/12/2015	NA	NA	Yes	14	Not ambiguous	Not ambiguous	5927	Neg	FALSE	A	Mobile	FALSE	0	0	0	0	1	1	0	0	Neg	Neg	Neg	Neg	Pos
A4616	UM/BDD	No	Neg	NA	Neg	Neg	NA	Neg	Neg	Neg	Neg	0	0	0	0	Pos	Pos	0	0	3+	2+	NA	0	18/12/2015	NA	NA	Yes	14	Not ambiguous	Not ambiguous	5929	Neg	FALSE	A	Mobile	FALSE	0	0	0	0	0	0	1	1	Neg	Neg	Neg	Neg	Neg
A4655	UM/BDD	No	Neg	NA	Neg	Neg	NA	Pos	Pos	Neg	Neg	0	0	0	0	Neg	Neg	0	0	0	0	NA	0	18/12/2015	NA	NA	Yes	1	Not ambiguous	Not ambiguous	5931	Neg	FALSE	A	Mobile	FALSE	0	0	0	0	0	0	0	0	Neg	Neg	Neg	Neg	Neg
A4656	UM/BDD	No	Neg	NA	Neg	Neg	NA	Pos	Pos	Neg	Neg	0	0	0	0	Neg	Neg	0	0	0	0	NA	0	18/12/2015	NA	NA	Yes	17	Not ambiguous	Not ambiguous	5933	Neg	FALSE	A	Mobile	FALSE	0	0	0	0	0	0	0	0	Neg	Neg	Neg	Neg	Neg
A4673	UM/BDD	No	Neg	NA	Neg	Neg	NA	Neg	Neg	Neg	Neg	0	0	0	0	Pos	Pos	1+	1+	2+	2+	NA	0	18/12/2015	NA	NA	Yes	33	Not ambiguous	Not ambiguous	5935	Neg	FALSE	A	Mobile	FALSE	0	0	0	0	1	1	1	1	Neg	Neg	Neg	Neg	Pos
A225	UM/BDD	No	NA	Neg	NA	NA	Pos	Pos	Pos	Neg	Neg	0	0	0	0	Neg	Neg	0	0	0	0	NA	0	09/12/2015	NA	1	Yes	13	Not ambiguous	Not ambiguous	5937	Pos	TRUE	A	Mobile	FALSE	0	0	0	0	0	0	0	0	Neg	Neg	Neg	Neg	Neg
A474	UM/BDD	No	NA	Neg	NA	NA	Pos	Neg	Neg	Pos	Pos	2+	0	0	2+	Pos	Pos	0	0	2+	1+	NA	0	10/12/2015	NA	6	Yes	13	Not ambiguous	Not ambiguous	5939	Pos	TRUE	A	Mobile	FALSE	1	0	0	1	0	0	1	1	Pos	Neg	Neg	Pos	Neg
A055	UM/BDD	No	Neg	NA	Neg	Neg	NA	Neg	Neg	Neg	Neg	0	0	0	0	Pos	Pos	0	0	2+	3+	NA	0	08/12/2015	NA	NA	Yes	7	Not ambiguous	Not ambiguous	5941	Neg	FALSE	A	Mobile	FALSE	0	0	0	0	0	0	1	1	Neg	Neg	Neg	Neg	Neg
A057	UM/BDD	No	Neg	NA	Neg	Neg	Neg	Neg	Neg	Neg	Neg	0	0	0	0	Pos	Pos	0	0	2+	2+	NA	0	08/12/2015	NA	NA	Yes	7	Not ambiguous	Not ambiguous	5943	Neg	FALSE	A	Mobile	FALSE	0	0	0	0	0	0	1	1	Neg	Neg	Neg	Neg	Neg
A118	UM/BDD	No	Neg	NA	Neg	Neg	Neg	Neg	Neg	Neg	Neg	0	0	0	0	Pos	Pos	2+	1+	3+	2+	NA	0	08/12/2015	NA	NA	Yes	8	Not ambiguous	Not ambiguous	5945	Neg	FALSE	A	Mobile	FALSE	0	0	0	0	1	1	1	1	Neg	Neg	Neg	Neg	Pos
A122	UM/BDD	No	Neg	NA	Neg	Neg	NA	Neg	Neg	Neg	Pos	0	0	0	2+	Pos	Pos	0	3+	2+	3+	NA	0	08/12/2015	NA	NA	Yes	11	Not ambiguous	Not ambiguous	5947	Neg	FALSE	A	Mobile	FALSE	0	0	0	1	0	1	1	1	Neg	Neg	Neg	Pos	Neg
A136	UM/BDD	No	Neg	NA	Neg	Neg	NA	Pos	Pos	Neg	Neg	0	0	0	0	Neg	Neg	0	0	0	0	NA	0	08/12/2015	NA	NA	Yes	10	Not ambiguous	Not ambiguous	5949	Neg	FALSE	A	Mobile	FALSE	0	0	0	0	0	0	0	0	Neg	Neg	Neg	Neg	Neg
A178	UM/BDD	No	Neg	NA	Neg	Neg	NA	Neg	Neg	Neg	Neg	0	0	0	0	Pos	Pos	2+	2+	0	0	NA	0	09/12/2015	NA	NA	Yes	11	Not ambiguous	Not ambiguous	5951	Neg	FALSE	A	Mobile	FALSE	0	0	0	0	1	1	0	0	Neg	Neg	Neg	Neg	Pos
A190	UM/BDD	No	Neg	NA	Neg	Neg	NA	Neg	Neg	Pos	Pos	0	0	2+	2+	Neg	Neg	0	0	0	0	NA	0	09/12/2015	NA	NA	Yes	11	Not ambiguous	Not ambiguous	5953	Neg	FALSE	A	Mobile	FALSE	0	0	1	1	0	0	0	0	Neg	Neg	Pos	Pos	Neg
A193	UM/BDD	No	Neg	NA	Neg	Neg	NA	Neg	Neg	Neg	Neg	0	0	0	0	Pos	Pos	0	0	2+	2+	NA	0	09/12/2015	NA	NA	Yes	11	Not ambiguous	Not ambiguous	5955	Neg	FALSE	A	Mobile	FALSE	0	0	0	0	0	0	1	1	Neg	Neg	Neg	Neg	Neg
A194	UM/BDD	No	Neg	NA	Neg	Neg	NA	Pos	Pos	Pos	Pos	0	0	2+	2+	Neg	Neg	0	0	0	0	NA	0	09/12/2015	NA	NA	Yes	11	Not ambiguous	Not ambiguous	5957	Neg	FALSE	A	Mobile	FALSE	0	0	1	1	0	0	0	0	Neg	Neg	Pos	Pos	Neg
A223	UM/BDD	No	Neg	NA	Neg	Neg	NA	Pos	Pos	Neg	Neg	0	0	0	0	Pos	Pos	2+	2+	0	0	NA	0	09/12/2015	NA	NA	Yes	13	Not ambiguous	Not ambiguous	5998	Neg	FALSE	A	Mobile	FALSE	0	0	0	0	1	1	0	0	Neg	Neg	Neg	Neg	Pos
A255	UM/BANDUNDU	No	Neg	NA	Neg	Neg	NA	Pos	Pos	Neg	Neg	0	0	0	0	Neg	Neg	0	0	0	0	NA	0	09/12/2015	NA	NA	Yes	36	Not ambiguous	Not ambiguous	6000	Neg	FALSE	A	Mobile	FALSE	0	0	0	0	0	0	0	0	Neg	Neg	Neg	Neg	Neg
A259	UM/BDD	No	Neg	NA	Neg	Neg	NA	Neg	Neg	Pos	Pos	2+	0	2+	2+	Neg	Neg	0	0	0	0	NA	0	09/12/2015	NA	NA	Yes	14	Not ambiguous	Not ambiguous	6002	Neg	FALSE	A	Mobile	FALSE	1	0	1	1	0	0	0	0	Pos	Neg	Pos	Pos	Neg
A279	UM/BDD	No	Neg	NA	Neg	Neg	NA	Neg	Neg	Pos	Pos	0	0	2+	2+	Neg	Neg	0	0	0	0	NA	0	09/12/2015	NA	NA	Yes	44	Not ambiguous	Not ambiguous	6004	Neg	FALSE	A	Mobile	FALSE	0	0	1	1	0	0	0	0	Neg	Neg	Pos	Pos	Neg
A303	UM/BDD	No	Neg	NA	Neg	Neg	NA	Neg	Neg	Neg	Neg	0	0	0	0	Pos	Pos	2+	1+	1+	1+	NA	0	09/12/2015	NA	NA	Yes	16	Not ambiguous	Not ambiguous	6006	Neg	FALSE	A	Mobile	FALSE	0	0	0	0	1	1	1	1	Neg	Neg	Neg	Neg	Pos
A370	UM/BDD	No	Neg	NA	Neg	Neg	NA	Neg	Neg	Pos	Neg	1+	0	1+	0	Neg	Neg	0	0	0	0	NA	0	09/12/2015	25	NA	Yes	35	Not ambiguous	Not ambiguous	6008	Neg	FALSE	A	Mobile	FALSE	1	0	1	0	0	0	0	0	Pos	Neg	Pos	Neg	Neg
A407	UM/BANDUNDU	No	Neg	NA	Neg	Neg	NA	Neg	Neg	Neg	Neg	0	0	0	0	Pos	Pos	3+	3+	0	0	NA	0	10/12/2015	NA	NA	Yes	4	Not ambiguous	Not ambiguous	6010	Neg	FALSE	A	Mobile	FALSE	0	0	0	0	1	1	0	0	Neg	Neg	Neg	Neg	Pos
A416	UM/BDD	No	Neg	NA	Neg	Neg	NA	Neg	Neg	Pos	Pos	2+	2+	2+	2+	Neg	Neg	0	0	0	0	NA	0	10/12/2015	NA	NA	Yes	13	Not ambiguous	Not ambiguous	6012	Neg	FALSE	A	Mobile	FALSE	1	1	1	1	0	0	0	0	Pos	Pos	Pos	Pos	Neg
A434	UM/BDD	No	Neg	NA	Neg	Neg	NA	Neg	Neg	Pos	Pos	3+	2+	2+	2+	Neg	Neg	0	0	0	0	NA	0	10/12/2015	NA	NA	Yes	13	Not ambiguous	Not ambiguous	6014	Neg	FALSE	A	Mobile	FALSE	1	1	1	1	0	0	0	0	Pos	Pos	Pos	Pos	Neg
A054	UNITE-MOBILE/BDD	No	Neg	NA	Neg	Neg	Neg	Neg	Neg	Neg	Neg	0	0	0	0	Pos	Pos	0	0	2+	2+	NA	0	06/12/2015	NA	NA	Yes	6	Not ambiguous	Not ambiguous	6018	Neg	FALSE	A	Mobile	FALSE	0	0	0	0	0	0	1	1	Neg	Neg	Neg	Neg	Neg
A104	UM/BDD	No	Neg	NA	Neg	Neg	NA	Neg	Neg	Neg	Neg	0	0	0	0	Pos	Pos	0	0	2+	2+	NA	0	08/12/2015	NA	NA	Yes	8	Not ambiguous	Not ambiguous	6020	Neg	FALSE	A	Mobile	FALSE	0	0	0	0	0	0	1	1	Neg	Neg	Neg	Neg	Neg
A179	UM/BDD	No	Neg	NA	Neg	Neg	NA	Neg	Neg	Neg	Neg	0	0	0	0	Pos	Pos	0	0	2+	2+	NA	0	09/12/2015	NA	NA	Yes	14	Not ambiguous	Not ambiguous	6022	Neg	FALSE	A	Mobile	FALSE	0	0	0	0	0	0	1	1	Neg	Neg	Neg	Neg	Neg
A256	UM/BANDUNDU	No	Neg	NA	Neg	Neg	NA	Pos	Pos	Pos	Pos	0	2+	1+	0	Neg	Neg	0	0	0	0	NA	0	09/12/2015	NA	NA	Yes	15	Not ambiguous	Not ambiguous	6024	Neg	FALSE	A	Mobile	FALSE	0	1	1	0	0	0	0	0	Neg	Pos	Pos	Neg	Neg
A369	UM/BANDUNDU	No	Neg	NA	Neg	Neg	NA	Neg	Neg	Pos	Pos	1+	1+	1+	1+	Pos	Pos	4+	1+	0	0	NA	0	09/12/2015	25	NA	Yes	39	Not ambiguous	Not ambiguous	6026	Neg	FALSE	A	Mobile	FALSE	1	1	1	1	1	1	0	0	Pos	Pos	Pos	Pos	Pos
A464	UM/BDD	No	Neg	NA	Neg	Neg	NA	Neg	Neg	Pos	Pos	2+	2+	2+	1+	Neg	Neg	0	0	0	0	NA	0	10/12/2015	NA	NA	Yes	12	Not ambiguous	Not ambiguous	6028	Neg	FALSE	A	Mobile	FALSE	1	1	1	1	0	0	0	0	Pos	Pos	Pos	Pos	Neg
A465	UM/BDD	No	Neg	NA	Neg	Neg	NA	Neg	Neg	Neg	Neg	0	0	0	0	Pos	Pos	2+	0	2+	3+	NA	0	10/12/2015	NA	NA	Yes	10	Not ambiguous	Not ambiguous	6030	Neg	FALSE	A	Mobile	FALSE	0	0	0	0	1	0	1	1	Neg	Neg	Neg	Neg	Pos
A594	UM/BDD	No	Neg	NA	Neg	Neg	NA	Neg	Neg	Pos	Pos	1+	1+	1+	0	Neg	Neg	0	0	0	0	NA	0	10/12/2015	25	NA	Yes	7	Not ambiguous	Not ambiguous	6032	Neg	FALSE	A	Mobile	FALSE	1	1	1	0	0	0	0	0	Pos	Pos	Pos	Neg	Neg
A828	UM/BANDUNDU	No	Neg	NA	Neg	Neg	NA	Neg	Neg	Neg	Neg	0	0	0	0	Pos	Pos	0	0	2+	2+	NA	0	12/12/2015	NA	NA	Yes	11	Not ambiguous	Not ambiguous	6034	Neg	FALSE	A	Mobile	FALSE	0	0	0	0	0	0	1	1	Neg	Neg	Neg	Neg	Neg
A4127	UM/BDD	No	Neg	NA	Neg	Neg	NA	Neg	Neg	Pos	Neg	2+	0	0	0	Pos	Pos	0	0	1+	3+	NA	0	16/07/2015	NA	NA	Yes	32	Not ambiguous	Not ambiguous	6036	Neg	FALSE	A	Mobile	FALSE	1	0	0	0	0	0	1	1	Pos	Neg	Neg	Neg	Neg
A4202	UM/BDD	No	Neg	NA	Neg	Neg	NA	Neg	Neg	Neg	Neg	0	0	0	0	Pos	Pos	2+	2+	1+	2+	NA	0	16/12/2015	NA	NA	Yes	40	Not ambiguous	Not ambiguous	6038	Neg	FALSE	A	Mobile	FALSE	0	0	0	0	1	1	1	1	Neg	Neg	Neg	Neg	Pos
A4222	UM/BDD	No	Neg	NA	Neg	Neg	NA	Neg	Neg	Neg	Neg	0	0	0	0	Pos	Pos	0	0	2+	3+	NA	0	16/12/2015	NA	NA	Yes	25	Not ambiguous	Not ambiguous	6040	Neg	FALSE	A	Mobile	FALSE	0	0	0	0	0	0	1	1	Neg	Neg	Neg	Neg	Neg
A4227	UM/BDD	No	Neg	NA	Neg	Neg	NA	Neg	Neg	Pos	Neg	2+	0	0	0	Pos	Pos	0	0	4+	4+	NA	0	16/12/2015	NA	NA	Yes	32	Not ambiguous	Not ambiguous	6042	Neg	FALSE	A	Mobile	FALSE	1	0	0	0	0	0	1	1	Pos	Neg	Neg	Neg	Neg
A4485	UM/BDD	No	Neg	NA	Neg	Neg	NA	Neg	Neg	Neg	Neg	0	0	0	0	Pos	Pos	2+	2+	0	0	NA	0	18/12/2015	NA	NA	Yes	14	Not ambiguous	Not ambiguous	6044	Neg	FALSE	A	Mobile	FALSE	0	0	0	0	1	1	0	0	Neg	Neg	Neg	Neg	Pos
A4660	UM/BDD	No	Neg	NA	Neg	Neg	NA	Neg	Neg	Neg	Neg	0	0	0	0	Pos	Pos	0	0	2+	2+	NA	0	18/12/2015	NA	NA	Yes	34	Not ambiguous	Not ambiguous	6046	Neg	FALSE	A	Mobile	FALSE	0	0	0	0	0	0	1	1	Neg	Neg	Neg	Neg	Neg
A4745	UM/BDD	No	Neg	NA	Neg	Neg	NA	Pos	Pos	Neg	Neg	0	0	0	0	Neg	Neg	0	0	0	0	NA	0	19/12/2015	NA	NA	Yes	0	Not ambiguous	Not ambiguous	6048	Neg	FALSE	A	Mobile	FALSE	0	0	0	0	0	0	0	0	Neg	Neg	Neg	Neg	Neg
A601	UM/BDD	No	Neg	NA	Neg	Neg	NA	Neg	Neg	Neg	Neg	0	0	0	0	Pos	Pos	1+	2+	0	0	NA	0	10/12/2015	NA	NA	Yes	7	Not ambiguous	Not ambiguous	6051	Neg	FALSE	A	Mobile	FALSE	0	0	0	0	1	1	0	0	Neg	Neg	Neg	Neg	Pos
A648	UM/BDD	No	Neg	NA	Neg	Neg	NA	Neg	Neg	Neg	Neg	0	0	0	0	Pos	Pos	0	0	2+	2+	NA	0	10/12/2015	NA	NA	Yes	7	Not ambiguous	Not ambiguous	6053	Neg	FALSE	A	Mobile	FALSE	0	0	0	0	0	0	1	1	Neg	Neg	Neg	Neg	Neg
A657	UM/BDD	No	Neg	NA	Neg	Neg	NA	Pos	Pos	Neg	Neg	0	0	0	0	Neg	Neg	0	0	0	0	NA	0	10/12/2015	NA	NA	Yes	2	Not ambiguous	Not ambiguous	6055	Neg	FALSE	A	Mobile	FALSE	0	0	0	0	0	0	0	0	Neg	Neg	Neg	Neg	Neg
A823	UM/BDD	No	Neg	NA	Neg	Neg	NA	Neg	Neg	Neg	Neg	0	0	0	0	Pos	Neg	0	0	1+	0	NA	0	12/12/2015	NA	NA	Yes	11	Not ambiguous	Not ambiguous	6085	Neg	FALSE	A	Mobile	FALSE	0	0	0	0	0	0	1	0	Neg	Neg	Neg	Neg	Neg
A961	UM/BDD	No	Neg	NA	Neg	Neg	NA	Pos	Pos	Neg	Neg	0	0	0	0	Neg	Neg	0	0	0	0	NA	0	12/12/2015	NA	NA	Yes	3	Not ambiguous	Not ambiguous	6087	Neg	FALSE	A	Mobile	FALSE	0	0	0	0	0	0	0	0	Neg	Neg	Neg	Neg	Neg
A971	UM/BDD	No	Neg	NA	Neg	Neg	NA	Neg	Neg	Neg	Neg	0	0	0	0	Pos	Pos	2+	2+	0	0	NA	0	12/12/2015	NA	NA	Yes	10	Not ambiguous	Not ambiguous	6089	Neg	FALSE	A	Mobile	FALSE	0	0	0	0	1	1	0	0	Neg	Neg	Neg	Neg	Pos
A972	UM/BDD	No	Neg	NA	Neg	Neg	NA	Neg	Neg	Pos	Pos	2+	2+	2+	2+	Neg	Neg	0	0	0	0	NA	0	12/12/2015	NA	NA	Yes	10	Not ambiguous	Not ambiguous	6091	Neg	FALSE	A	Mobile	FALSE	1	1	1	1	0	0	0	0	Pos	Pos	Pos	Pos	Neg
A998	UM/BANDUNDU	No	Neg	NA	Neg	Neg	NA	Neg	Neg	Neg	Neg	0	0	0	0	Pos	Pos	2+	2+	0	0	NA	0	12/12/2015	NA	NA	Yes	6	Not ambiguous	Not ambiguous	6093	Neg	FALSE	A	Mobile	FALSE	0	0	0	0	1	1	0	0	Neg	Neg	Neg	Neg	Pos
A1013	UM/BDD	No	Neg	NA	Neg	Neg	NA	Neg	Neg	Neg	Neg	0	0	0	0	Pos	Pos	0	0	2+	3+	NA	0	12/12/2015	NA	NA	Yes	30	Not ambiguous	Not ambiguous	6095	Neg	FALSE	A	Mobile	FALSE	0	0	0	0	0	0	1	1	Neg	Neg	Neg	Neg	Neg
A1349	UM/BDD	No	Neg	NA	Neg	Neg	NA	Neg	Neg	Neg	Neg	0	0	0	0	Pos	Pos	0	0	4+	4+	NA	0	13/12/2015	NA	NA	Yes	59	Not ambiguous	Not ambiguous	6097	Neg	FALSE	A	Mobile	FALSE	0	0	0	0	0	0	1	1	Neg	Neg	Neg	Neg	Neg
A1365	UM/BDD	No	Neg	NA	Neg	Neg	NA	Neg	Neg	Neg	Neg	0	0	0	0	Pos	Pos	3+	3+	0	0	NA	0	13/12/2015	NA	NA	Yes	68	Not ambiguous	Not ambiguous	6099	Neg	FALSE	A	Mobile	FALSE	0	0	0	0	1	1	0	0	Neg	Neg	Neg	Neg	Pos
A1378	UM/BDD	No	Neg	NA	Neg	Neg	NA	Pos	Pos	Neg	Neg	0	0	0	0	Neg	Neg	0	0	0	0	NA	0	13/12/2015	NA	NA	Yes	9	Not ambiguous	Not ambiguous	6101	Neg	FALSE	A	Mobile	FALSE	0	0	0	0	0	0	0	0	Neg	Neg	Neg	Neg	Neg
L1551	HS/NKARA	No	Neg	NA	Neg	Neg	NA	Neg	Neg	Pos	Pos	1+	1+	0	0	Neg	Neg	0	0	0	0	NA	0	06/01/2016	2	NA	Yes	42	Not ambiguous	Not ambiguous	6103	Neg	FALSE	L	Fixed	FALSE	1	1	0	0	0	0	0	0	Pos	Pos	Neg	Neg	Neg
L1558	HS NKARA	No	Neg	NA	Neg	Neg	NA	Pos	Pos	Pos	Pos	2+	2+	0	0	Pos	Pos	0	0	1+	1+	NA	0	11/01/2016	NA	NA	Yes	9	Not ambiguous	Not ambiguous	6107	Neg	FALSE	L	Fixed	FALSE	1	1	0	0	0	0	1	1	Pos	Pos	Neg	Neg	Neg
L1561	HS NKARA	No	Neg	NA	Neg	Neg	NA	Neg	Neg	Neg	Neg	0	0	0	0	Pos	Pos	1+	1+	0	0	NA	0	11/01/2016	NA	NA	Yes	7	Not ambiguous	Not ambiguous	6109	Neg	FALSE	L	Fixed	FALSE	0	0	0	0	1	1	0	0	Neg	Neg	Neg	Neg	Pos
B1879	UM KWAMOUTH	No	Neg	NA	Neg	Neg	NA	Pos	Pos	Neg	Neg	0	0	0	0	Pos	Pos	1+	3+	3+	1+	NA	0	09/12/2015	NA	NA	Yes	39	Not ambiguous	Not ambiguous	6124	Neg	FALSE	B	Mobile	FALSE	0	0	0	0	1	1	1	1	Neg	Neg	Neg	Neg	Pos
B1945	UM.KWAMOUTH	No	Neg	NA	Neg	Neg	NA	Neg	Neg	Neg	Pos	0	0	0	2+	Pos	Pos	3+	3+	0	0	NA	0	09/12/2015	NA	NA	Yes	15	Not ambiguous	Not ambiguous	6128	Neg	FALSE	B	Mobile	FALSE	0	0	0	1	1	1	0	0	Neg	Neg	Neg	Pos	Pos
B1919	UM/KWAMOUTH	No	Neg	NA	Neg	Neg	NA	Neg	Neg	Neg	Neg	0	0	0	0	Pos	Pos	0	0	2+	1+	NA	0	09/12/2015	NA	NA	Yes	5	Not ambiguous	Not ambiguous	6130	Neg	FALSE	B	Mobile	FALSE	0	0	0	0	0	0	1	1	Neg	Neg	Neg	Neg	Neg
B2239	UM.KWAMOUTH	No	Neg	NA	Neg	Neg	NA	Neg	Neg	Neg	Neg	0	0	0	0	Pos	Pos	2+	2+	1+	1+	NA	0	12/12/2015	NA	NA	Yes	23	Not ambiguous	Not ambiguous	6132	Neg	FALSE	B	Mobile	FALSE	0	0	0	0	1	1	1	1	Neg	Neg	Neg	Neg	Pos
B1909	UM/KWAMOUTH	No	Pos	Neg	NA	NA	NA	Pos	Pos	Neg	Pos	0	0	0	1+	Pos	Pos	0	0	1+	1+	NA	0	09/12/2015	NA	2	Yes	67	Not ambiguous	Not ambiguous	6134	Pos	TRUE	B	Mobile	FALSE	0	0	0	1	0	0	1	1	Neg	Neg	Neg	Pos	Neg
B1985	UM.KWAMOUTH	No	Pos	Neg	NA	NA	NA	Neg	Neg	Pos	Pos	0	0	1+	1+	Pos	Pos	0	0	3+	2+	NA	0	10/12/2015	NA	3	Yes	32	Not ambiguous	Not ambiguous	6136	Pos	TRUE	B	Mobile	FALSE	0	0	1	1	0	0	1	1	Neg	Neg	Pos	Pos	Neg
B1884	UM.KWAMOUTH	No	Pos	Neg	NA	NA	NA	Pos	Pos	Pos	Pos	0	0	2+	2+	Pos	Pos	0	0	2+	2+	NA	0	09/12/2015	NA	3	Yes	54	Not ambiguous	Not ambiguous	6138	Pos	TRUE	B	Mobile	FALSE	0	0	1	1	0	0	1	1	Neg	Neg	Pos	Pos	Neg
B2063	UM/KWAMOUTH	No	NA	Neg	NA	NA	Pos	Pos	Pos	Pos	Pos	0	0	2+	2+	Neg	Neg	0	0	0	0	NA	0	10/12/2015	NA	1	Yes	12	Not ambiguous	Not ambiguous	6140	Pos	TRUE	B	Mobile	FALSE	0	0	1	1	0	0	0	0	Neg	Neg	Pos	Pos	Neg
B2216	UM.KWAMOUTH	No	NA	Neg	NA	NA	Pos	Pos	Pos	Neg	Neg	0	0	0	0	Neg	Neg	0	0	0	0	NA	0	12/12/2015	NA	2	Yes	16	Not ambiguous	Not ambiguous	6142	Pos	TRUE	B	Mobile	FALSE	0	0	0	0	0	0	0	0	Neg	Neg	Neg	Neg	Neg
P1266	HGR/MASIMANIMBA	No	Neg	NA	Neg	Neg	NA	Pos	Pos	Neg	Neg	0	0	0	0	Neg	Neg	0	0	0	0	NA	0	16/12/2015	NA	NA	Yes	66	Not ambiguous	Not ambiguous	6144	Neg	FALSE	P	Fixed	FALSE	0	0	0	0	0	0	0	0	Neg	Neg	Neg	Neg	Neg
P1255	HGR/MASIMANIMBA	No	Neg	NA	Neg	Neg	NA	Pos	Pos	Neg	Neg	0	0	0	0	Neg	Neg	0	0	0	0	NA	0	14/12/2015	NA	NA	Yes	52	Not ambiguous	Not ambiguous	6146	Neg	FALSE	P	Fixed	FALSE	0	0	0	0	0	0	0	0	Neg	Neg	Neg	Neg	Neg
P1254	HGR/MASIMANIMBA	No	Neg	NA	Neg	Neg	NA	Pos	Pos	Neg	Neg	0	0	0	0	Neg	Neg	0	0	0	0	NA	0	14/12/2015	NA	NA	Yes	55	Not ambiguous	Not ambiguous	6148	Neg	FALSE	P	Fixed	FALSE	0	0	0	0	0	0	0	0	Neg	Neg	Neg	Neg	Neg
P1248	HGR/MASIMANIMBA	No	Neg	NA	Neg	Neg	NA	Pos	Pos	Neg	Neg	0	0	0	0	Neg	Neg	0	0	0	0	NA	0	14/12/2015	NA	NA	Yes	26	Ambiguous	Ambiguous	6150	Neg	FALSE	P	Fixed	FALSE	0	0	0	0	0	0	0	0	Neg	Neg	Neg	Neg	Neg
P1243	HGR/MASIMANIMBA	No	Neg	NA	Neg	Neg	NA	Neg	Neg	Neg	Neg	0	0	0	0	Pos	Pos	0	0	1+	1+	NA	0	11/12/2015	NA	NA	Yes	16	Not ambiguous	Not ambiguous	6154	Neg	FALSE	P	Fixed	FALSE	0	0	0	0	0	0	1	1	Neg	Neg	Neg	Neg	Neg
P1345	HGR/MASIMANIMBA	No	Neg	Pos	Pos	Pos	NA	Pos	Pos	Neg	Neg	0	0	0	0	Pos	Pos	1+	1+	2+	2+	NA	0	05/01/2016	NA	695	Yes	24	Not ambiguous	Not ambiguous	6156	Pos	TRUE	P	Fixed	FALSE	0	0	0	0	1	1	1	1	Neg	Neg	Neg	Neg	Pos
P1332	HGR/MASIMANIMBA	No	Neg	NA	Neg	Neg	NA	Neg	Neg	Neg	Neg	0	0	0	0	Pos	Pos	0	0	3+	3+	NA	0	30/12/2015	NA	NA	Yes	47	Not ambiguous	Not ambiguous	6158	Neg	FALSE	P	Fixed	FALSE	0	0	0	0	0	0	1	1	Neg	Neg	Neg	Neg	Neg
P1238	HGR/MASIMANIMBA	No	Neg	NA	Neg	Neg	NA	Pos	Pos	Neg	Neg	0	0	0	0	Neg	Neg	0	0	0	0	NA	0	11/12/2015	NA	NA	Yes	19	Ambiguous	Ambiguous	6162	Neg	FALSE	P	Fixed	FALSE	0	0	0	0	0	0	0	0	Neg	Neg	Neg	Neg	Neg
P1231	HGR/MASIMANIMBA	No	Neg	NA	Neg	Neg	NA	Pos	Pos	Neg	Neg	0	0	0	0	Neg	Neg	0	0	0	0	NA	0	11/12/2015	NA	NA	Yes	31	Not ambiguous	Not ambiguous	6164	Neg	FALSE	P	Fixed	FALSE	0	0	0	0	0	0	0	0	Neg	Neg	Neg	Neg	Neg
P1225	HGR/MASIMANIMBA	No	Neg	NA	Neg	Neg	NA	Neg	Neg	Neg	Neg	0	0	0	0	Pos	Pos	1+	1+	0	0	NA	0	09/12/2015	NA	NA	Yes	36	Not ambiguous	Not ambiguous	6166	Neg	FALSE	P	Fixed	FALSE	0	0	0	0	1	1	0	0	Neg	Neg	Neg	Neg	Pos
P1221	HGR/MASIMANIMBA	No	Neg	NA	Neg	Neg	NA	Pos	Pos	Neg	Neg	0	0	0	0	Neg	Neg	0	0	0	0	NA	0	09/12/2015	NA	NA	Yes	60	Ambiguous	Not ambiguous	6168	Neg	FALSE	P	Fixed	FALSE	0	0	0	0	0	0	0	0	Neg	Neg	Neg	Neg	Neg
B1995	UM/KWAMOUTH	No	Neg	NA	Neg	Neg	NA	Neg	Neg	Neg	Neg	0	0	0	0	Pos	Pos	0	2+	2+	2+	NA	0	10/12/2015	NA	NA	Yes	50	Not ambiguous	Not ambiguous	6172	Neg	FALSE	B	Mobile	FALSE	0	0	0	0	0	1	1	1	Neg	Neg	Neg	Neg	Neg
B2017	UM/KWAMOUTH	No	Neg	NA	Neg	Neg	NA	Neg	Neg	Pos	Pos	0	0	2+	2+	Pos	Pos	1+	1+	0	0	NA	0	10/12/2015	NA	NA	Yes	92	Not ambiguous	Not ambiguous	6176	Neg	FALSE	B	Mobile	FALSE	0	0	1	1	1	1	0	0	Neg	Neg	Pos	Pos	Pos
B2043	UM.KWAMOUTH	No	Neg	NA	Neg	Neg	NA	Pos	Pos	Neg	Neg	0	0	0	0	Neg	Neg	0	0	0	0	NA	0	10/12/2015	NA	NA	Yes	15	Not ambiguous	Not ambiguous	6178	Neg	FALSE	B	Mobile	FALSE	0	0	0	0	0	0	0	0	Neg	Neg	Neg	Neg	Neg
B2106	UM.KWAMOUTH	No	Neg	NA	Neg	Neg	NA	Neg	Neg	Neg	Neg	0	0	0	0	Pos	Pos	1+	1+	1+	0	NA	0	10/12/2015	NA	NA	Yes	4	Not ambiguous	Not ambiguous	6180	Neg	FALSE	B	Mobile	FALSE	0	0	0	0	1	1	1	0	Neg	Neg	Neg	Neg	Pos
B3291	UM/KWAMOUTH	No	Pos	Neg	NA	NA	NA	Pos	Pos	Neg	Neg	0	0	0	0	Neg	Neg	0	0	0	0	NA	0	13/01/2016	NA	4	Yes	43	Not ambiguous	Not ambiguous	6182	Pos	TRUE	B	Mobile	FALSE	0	0	0	0	0	0	0	0	Neg	Neg	Neg	Neg	Neg
B3326	UM/KWAMOUTH	No	Neg	NA	Neg	Neg	NA	Pos	Pos	Neg	Neg	0	0	0	0	Neg	Neg	0	0	0	0	NA	0	13/01/2016	NA	NA	Yes	40	Not ambiguous	Not ambiguous	6184	Neg	FALSE	B	Mobile	FALSE	0	0	0	0	0	0	0	0	Neg	Neg	Neg	Neg	Neg
B3426	UM/KWAMOUTH	No	Neg	NA	Neg	Neg	NA	Pos	Pos	Pos	Pos	1+	1+	1+	2+	Neg	Neg	0	0	0	0	NA	0	14/01/2016	99	NA	Yes	10	Not ambiguous	Not ambiguous	6186	Neg	FALSE	B	Mobile	FALSE	1	1	1	1	0	0	0	0	Pos	Pos	Pos	Pos	Neg
B3448	UM/KWAMOUTH	No	Neg	NA	Neg	Neg	NA	Pos	Pos	Neg	Neg	0	0	0	0	Neg	Neg	0	0	0	0	NA	0	14/01/2016	NA	NA	Yes	13	Not ambiguous	Not ambiguous	6188	Neg	FALSE	B	Mobile	FALSE	0	0	0	0	0	0	0	0	Neg	Neg	Neg	Neg	Neg
B2121	UM.KWAMOUTH	No	Neg	NA	Neg	Neg	NA	Neg	Neg	Pos	Pos	0	0	2+	2+	Pos	Pos	1+	3+	2+	0	NA	0	10/12/2015	NA	NA	Yes	15	Not ambiguous	Not ambiguous	6190	Neg	FALSE	B	Mobile	FALSE	0	0	1	1	1	1	1	0	Neg	Neg	Pos	Pos	Pos
B2143	UM.KWAMOUTH	No	Neg	NA	Neg	Neg	NA	Pos	Pos	Neg	Neg	0	0	0	0	Pos	Pos	2+	1+	2+	0	NA	0	11/12/2015	NA	NA	Yes	15	Not ambiguous	Not ambiguous	6192	Neg	FALSE	B	Mobile	FALSE	0	0	0	0	1	1	1	0	Neg	Neg	Neg	Neg	Pos
B1974	UM/KWAMOUTH	No	Neg	NA	Neg	Neg	NA	Pos	Pos	Neg	Neg	0	0	0	0	Neg	Neg	0	0	0	0	NA	0	09/12/2015	NA	NA	Yes	10	Not ambiguous	Not ambiguous	6194	Neg	FALSE	B	Mobile	FALSE	0	0	0	0	0	0	0	0	Neg	Neg	Neg	Neg	Neg
B1994	UM/KWAMOUTH	No	Neg	NA	Neg	Neg	NA	Neg	Neg	Neg	Neg	0	0	0	0	Pos	Pos	0	0	2+	3+	NA	0	10/12/2015	NA	NA	Yes	47	Not ambiguous	Not ambiguous	6198	Neg	FALSE	B	Mobile	FALSE	0	0	0	0	0	0	1	1	Neg	Neg	Neg	Neg	Neg
B4316	UM/KWAMOUTH	No	Neg	NA	Neg	Neg	NA	Neg	Neg	Neg	Neg	0	0	0	0	Pos	Pos	0	0	2+	4+	NA	0	19/01/2016	NA	NA	Yes	14	Not ambiguous	Not ambiguous	6202	Neg	FALSE	B	Mobile	FALSE	0	0	0	0	0	0	1	1	Neg	Neg	Neg	Neg	Neg
B4833	UM/KWAMOUTH	No	Neg	NA	Neg	Neg	NA	Pos	Pos	Pos	Pos	1+	1+	2+	2+	Pos	Pos	3+	4+	0	0	NA	0	22/01/2016	99	NA	Yes	31	Not ambiguous	Not ambiguous	6204	Neg	FALSE	B	Mobile	FALSE	1	1	1	1	1	1	0	0	Pos	Pos	Pos	Pos	Pos
B4804	UM/KWAMOUTH	No	Neg	NA	Neg	Neg	NA	Neg	Neg	Neg	Neg	0	0	0	0	Pos	Pos	0	1+	1+	0	NA	0	22/01/2016	NA	NA	Yes	59	Not ambiguous	Not ambiguous	6206	Neg	FALSE	B	Mobile	FALSE	0	0	0	0	0	1	1	0	Neg	Neg	Neg	Neg	Neg
B3350	UM/KWAMOUTH	No	Neg	NA	Neg	Neg	NA	Neg	Neg	Pos	Pos	0	0	2+	2+	Neg	Neg	0	0	0	0	NA	0	13/01/2016	NA	NA	Yes	27	Not ambiguous	Not ambiguous	6208	Neg	FALSE	B	Mobile	FALSE	0	0	1	1	0	0	0	0	Neg	Neg	Pos	Pos	Neg
B3316	UM/KWAMOUTH	No	Neg	NA	Neg	Neg	NA	Pos	Pos	Neg	Neg	0	0	0	0	Neg	Neg	0	0	0	0	NA	0	13/01/2016	NA	NA	Yes	12	Not ambiguous	Not ambiguous	6210	Neg	FALSE	B	Mobile	FALSE	0	0	0	0	0	0	0	0	Neg	Neg	Neg	Neg	Neg
B2095	UM.KWAMOUTH	No	Neg	NA	Neg	Neg	NA	Neg	Neg	Neg	Neg	0	0	0	0	Pos	Pos	1+	1+	2+	1+	NA	0	10/12/2015	NA	NA	Yes	20	Not ambiguous	Not ambiguous	6212	Neg	FALSE	B	Mobile	FALSE	0	0	0	0	1	1	1	1	Neg	Neg	Neg	Neg	Pos
B1950	UM/KWAMOUTH	No	Neg	NA	Neg	Neg	NA	Neg	Neg	Pos	Pos	0	0	2+	2+	Pos	Pos	0	0	1+	1+	NA	0	09/12/2015	NA	NA	Yes	25	Not ambiguous	Not ambiguous	6214	Neg	FALSE	B	Mobile	FALSE	0	0	1	1	0	0	1	1	Neg	Neg	Pos	Pos	Neg
B1939	UM/KWAMOUTH	No	Neg	NA	Neg	Neg	NA	Neg	Neg	Pos	Pos	1+	1+	0	0	Pos	Pos	1+	1+	0	0	NA	0	09/12/2015	99	NA	Yes	24	Not ambiguous	Not ambiguous	6216	Neg	FALSE	B	Mobile	FALSE	1	1	0	0	1	1	0	0	Pos	Pos	Neg	Neg	Pos
B1891	UM/KWAMOUTH	No	Neg	NA	Neg	Neg	NA	Pos	Pos	Neg	Pos	0	0	0	1+	Neg	Neg	0	0	0	0	NA	0	09/12/2015	NA	NA	Yes	5	Not ambiguous	Not ambiguous	6218	Neg	FALSE	B	Mobile	FALSE	0	0	0	1	0	0	0	0	Neg	Neg	Neg	Pos	Neg
B2175	UM.KWAMOUTH	No	Neg	NA	Neg	Neg	NA	Pos	Pos	Neg	Neg	0	0	0	0	Pos	Pos	0	2+	1+	1+	NA	0	11/12/2015	NA	NA	Yes	30	Not ambiguous	Not ambiguous	6220	Neg	FALSE	B	Mobile	FALSE	0	0	0	0	0	1	1	1	Neg	Neg	Neg	Neg	Neg
B2225	UM.KWAMOUTH	No	Neg	NA	Neg	Neg	NA	Neg	Neg	Pos	Pos	1+	0	1+	2+	Pos	Pos	0	0	2+	4+	NA	0	12/12/2015	99	NA	Yes	45	Not ambiguous	Not ambiguous	6222	Neg	FALSE	B	Mobile	FALSE	1	0	1	1	0	0	1	1	Pos	Neg	Pos	Pos	Neg
B2114	UM.KWAMOUTH	No	Neg	NA	Neg	Neg	NA	Neg	Neg	Neg	Neg	0	0	0	0	Pos	Pos	1+	1+	0	0	NA	0	10/12/2015	NA	NA	Yes	3	Not ambiguous	Not ambiguous	6224	Neg	FALSE	B	Mobile	FALSE	0	0	0	0	1	1	0	0	Neg	Neg	Neg	Neg	Pos
B2217	UM.KWAMOUTH	No	Neg	NA	Neg	Neg	NA	Neg	Neg	Neg	Neg	0	0	0	0	Pos	Pos	2+	1+	1+	1+	NA	0	12/12/2015	NA	NA	Yes	18	Not ambiguous	Not ambiguous	6226	Neg	FALSE	B	Mobile	FALSE	0	0	0	0	1	1	1	1	Neg	Neg	Neg	Neg	Pos
B2146	UM.KWAMOUTH	No	Neg	NA	Neg	Neg	NA	Neg	Neg	Neg	Neg	0	0	0	0	Neg	Neg	0	0	0	0	NA	0	11/12/2015	NA	NA	Yes	4	Not ambiguous	Not ambiguous	6228	Neg	FALSE	B	Mobile	FALSE	0	0	0	0	0	0	0	0	Neg	Neg	Neg	Neg	Neg
B4056	UM/KWAMOUTH	No	Neg	NA	Neg	Neg	NA	Neg	Neg	Pos	Pos	0	1+	2+	2+	Pos	Pos	0	0	3+	4+	NA	0	18/01/2016	NA	NA	Yes	34	Not ambiguous	Not ambiguous	6267	Neg	FALSE	B	Mobile	FALSE	0	1	1	1	0	0	1	1	Neg	Pos	Pos	Pos	Neg
B3992	UM/KWAMOUTH	No	Neg	NA	Neg	Neg	NA	Neg	Neg	Neg	Neg	0	0	0	0	Pos	Pos	0	0	2+	1+	NA	0	17/01/2016	NA	NA	Yes	62	Not ambiguous	Not ambiguous	6269	Neg	FALSE	B	Mobile	FALSE	0	0	0	0	0	0	1	1	Neg	Neg	Neg	Neg	Neg
B3871	UM/KWAMOUTH	No	Neg	NA	Neg	Neg	NA	Neg	Neg	Neg	Neg	0	0	0	0	Pos	Pos	2+	2+	0	0	NA	0	17/01/2016	NA	NA	Yes	40	Not ambiguous	Not ambiguous	6271	Neg	FALSE	B	Mobile	FALSE	0	0	0	0	1	1	0	0	Neg	Neg	Neg	Neg	Pos
B3873	UM/KWAMOUTH	No	Neg	NA	Neg	Neg	NA	Neg	Neg	Neg	Neg	0	0	0	0	Pos	Pos	0	0	3+	3+	NA	0	17/01/2016	NA	NA	Yes	9	Not ambiguous	Not ambiguous	6273	Neg	FALSE	B	Mobile	FALSE	0	0	0	0	0	0	1	1	Neg	Neg	Neg	Neg	Neg
B4215	UM/KWAMOUTH	No	Neg	NA	Neg	Neg	NA	Pos	Pos	Neg	Neg	0	0	0	0	Pos	Pos	2+	2+	4+	3+	NA	0	19/01/2016	NA	NA	Yes	23	Not ambiguous	Not ambiguous	6275	Neg	FALSE	B	Mobile	FALSE	0	0	0	0	1	1	1	1	Neg	Neg	Neg	Neg	Pos
B4405	UM/KWAMOUTH	No	Neg	NA	Neg	Neg	NA	Neg	Neg	Pos	Pos	0	0	2+	2+	Pos	Pos	3+	4+	1+	1+	NA	0	20/01/2016	NA	NA	Yes	11	Not ambiguous	Not ambiguous	6277	Neg	FALSE	B	Mobile	FALSE	0	0	1	1	1	1	1	1	Neg	Neg	Pos	Pos	Pos
B4417	UM/KWAMOUTH	No	Neg	NA	Neg	Neg	NA	Neg	Neg	Neg	Neg	0	0	0	0	Pos	Pos	0	0	3+	4+	NA	0	20/01/2016	NA	NA	Yes	10	Not ambiguous	Not ambiguous	6279	Neg	FALSE	B	Mobile	FALSE	0	0	0	0	0	0	1	1	Neg	Neg	Neg	Neg	Neg
B4433	UM/KWAMOUTH	No	Neg	NA	Neg	Neg	NA	Neg	Neg	Neg	Neg	0	0	0	0	Pos	Pos	1+	2+	0	0	NA	0	20/01/2016	NA	NA	Yes	15	Not ambiguous	Not ambiguous	6281	Neg	FALSE	B	Mobile	FALSE	0	0	0	0	1	1	0	0	Neg	Neg	Neg	Neg	Pos
B4504	UM/KWAMOUTH	No	Neg	NA	Neg	Neg	NA	Neg	Neg	Neg	Neg	0	0	0	0	Pos	Pos	0	0	4+	4+	NA	0	20/01/2016	NA	NA	Yes	31	Not ambiguous	Not ambiguous	6283	Neg	FALSE	B	Mobile	FALSE	0	0	0	0	0	0	1	1	Neg	Neg	Neg	Neg	Neg
B4507	UM/KWAMOUTH	No	Neg	NA	Neg	Neg	NA	Neg	Neg	Neg	Neg	0	0	0	0	Pos	Pos	2+	3+	0	0	NA	0	20/01/2016	NA	NA	Yes	15	Not ambiguous	Not ambiguous	6285	Neg	FALSE	B	Mobile	FALSE	0	0	0	0	1	1	0	0	Neg	Neg	Neg	Neg	Pos
B4515	UM/KWAMOUTH	No	Neg	NA	Neg	Neg	NA	Pos	Pos	Neg	Neg	0	0	0	0	Pos	Pos	0	0	2+	3+	NA	0	20/01/2016	NA	NA	Yes	12	Not ambiguous	Not ambiguous	6287	Neg	FALSE	B	Mobile	FALSE	0	0	0	0	0	0	1	1	Neg	Neg	Neg	Neg	Neg
B4516	UM/KWAMOUTH	No	Neg	NA	Neg	Neg	NA	Pos	Pos	Neg	Neg	0	0	0	0	Neg	Neg	0	0	0	0	NA	0	20/01/2016	NA	NA	Yes	16	Not ambiguous	Not ambiguous	6289	Neg	FALSE	B	Mobile	FALSE	0	0	0	0	0	0	0	0	Neg	Neg	Neg	Neg	Neg
B4517	UM/KWAMOUTH	No	Neg	NA	Neg	Neg	NA	Neg	Neg	Neg	Neg	0	0	0	0	Pos	Pos	1+	1+	0	2+	NA	0	20/01/2016	NA	NA	Yes	14	Not ambiguous	Not ambiguous	6291	Neg	FALSE	B	Mobile	FALSE	0	0	0	0	1	1	0	1	Neg	Neg	Neg	Neg	Pos
B4520	UM/KWAMOUTH	No	Neg	NA	Neg	Neg	NA	Neg	Neg	Neg	Neg	0	0	0	0	Pos	Pos	0	0	1+	1+	NA	0	20/01/2016	NA	NA	Yes	15	Not ambiguous	Not ambiguous	6293	Neg	FALSE	B	Mobile	FALSE	0	0	0	0	0	0	1	1	Neg	Neg	Neg	Neg	Neg
B4754	UM/KWAMOUTH	No	Neg	NA	Neg	Neg	NA	Neg	Neg	Neg	Neg	0	0	0	0	Pos	Pos	0	0	2+	4+	NA	0	22/01/2016	NA	NA	Yes	44	Not ambiguous	Not ambiguous	6295	Neg	FALSE	B	Mobile	FALSE	0	0	0	0	0	0	1	1	Neg	Neg	Neg	Neg	Neg
B2541	UM/KWAMOUTH	No	Neg	NA	Neg	Neg	NA	Pos	Pos	Neg	Neg	0	0	0	0	Neg	Neg	0	0	0	0	NA	0	17/12/2015	NA	NA	Yes	8	Not ambiguous	Not ambiguous	6325	Neg	FALSE	B	Mobile	FALSE	0	0	0	0	0	0	0	0	Neg	Neg	Neg	Neg	Neg
B2483	UM/KWAMOUTH	No	Neg	NA	Neg	Neg	NA	Pos	Pos	Pos	Pos	0	0	1+	1+	Neg	Neg	0	0	0	0	NA	0	17/12/2015	NA	NA	Yes	4	Not ambiguous	Not ambiguous	6327	Neg	FALSE	B	Mobile	FALSE	0	0	1	1	0	0	0	0	Neg	Neg	Pos	Pos	Neg
B2457	UM/KWAMOUTH	No	Neg	NA	Neg	Neg	NA	Pos	Pos	Pos	Pos	1+	0	2+	1+	Neg	Neg	0	0	0	0	NA	0	17/12/2015	99	NA	Yes	36	Not ambiguous	Not ambiguous	6329	Neg	FALSE	B	Mobile	FALSE	1	0	1	1	0	0	0	0	Pos	Neg	Pos	Pos	Neg
B2449	UM/KWAMOUTH	No	Neg	NA	Neg	Neg	NA	Pos	Pos	Pos	Pos	0	0	1+	1+	Pos	Pos	0	0	1+	1+	NA	0	17/12/2015	NA	NA	Yes	14	Not ambiguous	Not ambiguous	6331	Neg	FALSE	B	Mobile	FALSE	0	0	1	1	0	0	1	1	Neg	Neg	Pos	Pos	Neg
B2261	UM/KWAMOUTH	No	Neg	NA	Neg	Neg	NA	Neg	Neg	Neg	Neg	0	0	0	0	Pos	Pos	3+	3+	0	0	NA	0	14/12/2015	NA	NA	Yes	22	Not ambiguous	Not ambiguous	6333	Neg	FALSE	B	Mobile	FALSE	0	0	0	0	1	1	0	0	Neg	Neg	Neg	Neg	Pos
B2272	UM/KWAMOUTH	No	Neg	NA	Neg	Neg	NA	Pos	Pos	Pos	Pos	2+	2+	0	0	Neg	Neg	0	0	0	0	NA	0	14/12/2015	NA	NA	Yes	30	Not ambiguous	Not ambiguous	6337	Neg	FALSE	B	Mobile	FALSE	1	1	0	0	0	0	0	0	Pos	Pos	Neg	Neg	Neg
A990	UM/BDD	No	Neg	NA	Neg	Neg	NA	Neg	Neg	Pos	Neg	0	0	2+	0	Neg	Neg	0	0	0	0	NA	0	21/06/2015	NA	NA	Yes	34	Not ambiguous	Not ambiguous	6339	Neg	FALSE	A	Mobile	FALSE	0	0	1	0	0	0	0	0	Neg	Neg	Pos	Neg	Neg
B2764	UM/KWAMOUTH	No	Neg	NA	Neg	Neg	NA	Pos	Pos	Pos	Pos	0	0	1+	1+	Pos	Pos	0	0	1+	1+	NA	0	20/12/2015	NA	NA	Yes	10	Not ambiguous	Not ambiguous	6341	Neg	FALSE	B	Mobile	FALSE	0	0	1	1	0	0	1	1	Neg	Neg	Pos	Pos	Neg
B2632	UM/KWAMOUTH	No	Neg	NA	Neg	Neg	NA	Pos	Pos	Neg	Neg	0	0	0	0	Pos	Pos	0	1+	1+	0	NA	0	22/12/2015	NA	NA	Yes	10	Not ambiguous	Not ambiguous	6343	Neg	FALSE	B	Mobile	FALSE	0	0	0	0	0	1	1	0	Neg	Neg	Neg	Neg	Neg
B2264	UM/KWAMOUTH	No	Neg	NA	Neg	Neg	NA	Neg	Neg	Pos	Pos	0	1+	1+	0	Neg	Neg	0	0	0	0	NA	0	14/12/2015	NA	NA	Yes	24	Not ambiguous	Not ambiguous	6355	Neg	FALSE	B	Mobile	FALSE	0	1	1	0	0	0	0	0	Neg	Pos	Pos	Neg	Neg
B2635	UM/KWAMOUTH	No	Neg	NA	Neg	Neg	NA	Pos	Pos	Neg	Neg	0	0	0	0	Neg	Neg	0	0	0	0	NA	0	22/12/2015	NA	NA	Yes	32	Not ambiguous	Not ambiguous	6357	Neg	FALSE	B	Mobile	FALSE	0	0	0	0	0	0	0	0	Neg	Neg	Neg	Neg	Neg
B2680	UM/KWAMOUTH	No	Neg	NA	Neg	Neg	NA	Pos	Pos	Neg	Neg	0	0	0	0	Pos	Pos	0	0	1+	1+	NA	0	19/12/2015	NA	9	Yes	10	Not ambiguous	Not ambiguous	6359	Neg	FALSE	B	Mobile	FALSE	0	0	0	0	0	0	1	1	Neg	Neg	Neg	Neg	Neg
B2556	UM/KWAMOUTH	No	Neg	NA	Neg	Neg	NA	Pos	Pos	Neg	Neg	0	0	0	0	Neg	Neg	0	0	0	0	NA	0	22/12/2015	NA	9	Yes	14	Not ambiguous	Not ambiguous	6361	Neg	FALSE	B	Mobile	FALSE	0	0	0	0	0	0	0	0	Neg	Neg	Neg	Neg	Neg
B2441	UM/KWAMOUTH	No	Neg	NA	Neg	Neg	NA	Neg	Neg	Pos	Pos	0	0	1+	1+	Pos	Pos	1+	2+	2+	2+	NA	0	17/12/2015	99	9	Yes	53	Not ambiguous	Not ambiguous	6363	Neg	FALSE	B	Mobile	FALSE	0	0	1	1	1	1	1	1	Neg	Neg	Pos	Pos	Pos
B2436	UM/KWAMOUTH	No	Neg	NA	Neg	Neg	NA	Pos	Pos	Pos	Pos	0	0	1+	1+	Neg	Neg	0	0	0	0	NA	0	21/12/2015	NA	9	Yes	40	Not ambiguous	Not ambiguous	6365	Neg	FALSE	B	Mobile	FALSE	0	0	1	1	0	0	0	0	Neg	Neg	Pos	Pos	Neg
B2425	UM/KWAMOUTH	No	Neg	NA	Neg	Neg	NA	Pos	Pos	Pos	Pos	1+	0	0	1+	Pos	Pos	0	1+	1+	0	NA	0	17/12/2015	99	9	Yes	51	Not ambiguous	Not ambiguous	6367	Neg	FALSE	B	Mobile	FALSE	1	0	0	1	0	1	1	0	Pos	Neg	Neg	Pos	Neg
B2423	UM/KWAMOUTH	No	Neg	NA	Neg	Neg	NA	Pos	Pos	Pos	Pos	2+	1+	0	0	Neg	Neg	0	0	0	0	NA	0	17/12/2015	NA	9	Yes	17	Not ambiguous	Not ambiguous	6369	Neg	FALSE	B	Mobile	FALSE	1	1	0	0	0	0	0	0	Pos	Pos	Neg	Neg	Neg
B2362	UM/KWAMOUTH	No	Neg	NA	Neg	Neg	NA	Pos	Pos	Neg	Neg	0	0	0	0	Neg	Neg	0	0	0	0	NA	0	17/12/2015	NA	9	Yes	5	Not ambiguous	Not ambiguous	6371	Neg	FALSE	B	Mobile	FALSE	0	0	0	0	0	0	0	0	Neg	Neg	Neg	Neg	Neg
B2307	UM/KWAMOUTH	No	Neg	NA	Neg	Neg	NA	Neg	Neg	Neg	Neg	0	0	0	0	Pos	Pos	1+	1+	2+	2+	NA	0	14/12/2015	NA	NA	Yes	19	Not ambiguous	Not ambiguous	6373	Neg	FALSE	B	Mobile	FALSE	0	0	0	0	1	1	1	1	Neg	Neg	Neg	Neg	Pos
B2366	UM/KWAMOUTH	No	Pos	Neg	NA	NA	NA	Pos	Pos	Neg	Neg	0	0	0	0	Neg	Neg	0	0	0	0	NA	0	17/12/2015	NA	18	Yes	32	Not ambiguous	Not ambiguous	6375	Pos	TRUE	B	Mobile	FALSE	0	0	0	0	0	0	0	0	Neg	Neg	Neg	Neg	Neg
B2317	UM/KWAMOUTH	No	Neg	NA	Neg	Neg	NA	Neg	Neg	Pos	Pos	2+	2+	1+	1+	Neg	Neg	0	0	0	0	NA	0	14/12/2015	NA	2	Yes	51	Not ambiguous	Not ambiguous	6377	Neg	FALSE	B	Mobile	FALSE	1	1	1	1	0	0	0	0	Pos	Pos	Pos	Pos	Neg
B2766	UM/KWAMOUTH	No	Neg	NA	Neg	Neg	NA	Neg	Neg	Pos	Pos	1+	1+	2+	2+	Pos	Pos	1+	1+	2+	2+	NA	0	20/12/2015	99	NA	Yes	30	Not ambiguous	Not ambiguous	6391	Neg	FALSE	B	Mobile	FALSE	1	1	1	1	1	1	1	1	Pos	Pos	Pos	Pos	Pos
B1529	UM/KWAMOUTH	No	Neg	NA	Neg	Neg	NA	Neg	Neg	Neg	Neg	0	0	0	0	Pos	Neg	1+	0	0	0	NA	0	05/12/2015	NA	NA	Yes	40	Not ambiguous	Not ambiguous	6393	Neg	FALSE	B	Mobile	FALSE	0	0	0	0	1	0	0	0	Neg	Neg	Neg	Neg	Pos
B2038	UM/KWAMOUTH	No	NA	Neg	NA	NA	Pos	Neg	Neg	Neg	Neg	0	0	0	0	Neg	Neg	0	0	0	0	NA	0	10/12/2015	NA	2	Yes	12	Not ambiguous	Not ambiguous	6395	Pos	TRUE	B	Mobile	FALSE	0	0	0	0	0	0	0	0	Neg	Neg	Neg	Neg	Neg
B4900	UM/KWAMOUTH	No	Neg	NA	Neg	Neg	NA	Neg	Neg	Pos	Pos	1+	1+	0	0	Neg	Neg	0	0	0	0	NA	0	23/01/2016	99	NA	Yes	20	Not ambiguous	Not ambiguous	6397	Neg	FALSE	B	Mobile	FALSE	1	1	0	0	0	0	0	0	Pos	Pos	Neg	Neg	Neg
B4806	UM/KWAMOUTH	No	Neg	NA	Neg	Neg	NA	Neg	Neg	Neg	Neg	0	0	0	0	Pos	Pos	0	1+	1+	0	NA	0	22/01/2016	NA	NA	Yes	43	Not ambiguous	Not ambiguous	6399	Neg	FALSE	B	Mobile	FALSE	0	0	0	0	0	1	1	0	Neg	Neg	Neg	Neg	Neg
B2265	UM/KWAMOUTH	No	Pos	Neg	NA	NA	NA	Pos	Pos	Neg	Neg	0	0	0	0	Neg	Neg	0	0	0	0	NA	0	14/12/2015	NA	2	Yes	4	Not ambiguous	Not ambiguous	6401	Pos	TRUE	B	Mobile	FALSE	0	0	0	0	0	0	0	0	Neg	Neg	Neg	Neg	Neg
B2260	UM/KWAMOUTH	No	Pos	Neg	NA	NA	NA	Neg	Neg	Neg	Neg	0	0	0	0	Pos	Pos	2+	2+	0	0	NA	0	14/12/2015	NA	2	Yes	46	Not ambiguous	Not ambiguous	6403	Pos	TRUE	B	Mobile	FALSE	0	0	0	0	1	1	0	0	Neg	Neg	Neg	Neg	Pos
B3861	UM/KWAMOUTH	No	Neg	NA	Neg	Neg	NA	Neg	Neg	Neg	Neg	0	0	0	0	Pos	Pos	0	0	2+	2+	NA	0	17/01/2016	NA	NA	Yes	46	Not ambiguous	Not ambiguous	6405	Neg	FALSE	B	Mobile	FALSE	0	0	0	0	0	0	1	1	Neg	Neg	Neg	Neg	Neg
B3857	UM/KWAMOUTH	No	Neg	NA	Neg	Neg	NA	Neg	Neg	Neg	Neg	0	0	0	0	Pos	Pos	0	1+	1+	0	NA	0	16/01/2016	NA	NA	Yes	15	Not ambiguous	Not ambiguous	6407	Neg	FALSE	B	Mobile	FALSE	0	0	0	0	0	1	1	0	Neg	Neg	Neg	Neg	Neg
B3551	UM/KWAMOUTH	No	Neg	NA	Neg	Neg	NA	Neg	Neg	Pos	Pos	1+	1+	0	0	Neg	Neg	0	0	0	0	NA	0	15/01/2016	99	NA	Yes	8	Not ambiguous	Not ambiguous	6409	Neg	FALSE	B	Mobile	FALSE	1	1	0	0	0	0	0	0	Pos	Pos	Neg	Neg	Neg
B3550	UM/KWAMOUTH	No	Neg	NA	Neg	Neg	NA	Neg	Neg	Pos	Pos	1+	1+	0	0	Neg	Neg	0	0	0	0	NA	0	15/01/2016	99	NA	Yes	8	Not ambiguous	Not ambiguous	6411	Neg	FALSE	B	Mobile	FALSE	1	1	0	0	0	0	0	0	Pos	Pos	Neg	Neg	Neg
B3518	UM/KWAMOUTH	No	Neg	NA	Neg	Neg	NA	Neg	Neg	Neg	Neg	0	0	0	0	Pos	Pos	2+	2+	2+	2+	NA	0	15/01/2016	NA	NA	Yes	11	Not ambiguous	Not ambiguous	6413	Neg	FALSE	B	Mobile	FALSE	0	0	0	0	1	1	1	1	Neg	Neg	Neg	Neg	Pos
B3546	UM/KWAMOUTH	No	Neg	NA	Neg	Neg	NA	Neg	Neg	Pos	Pos	1+	1+	0	0	Neg	Neg	0	0	0	0	NA	0	15/01/2016	99	NA	Yes	8	Not ambiguous	Not ambiguous	6415	Neg	FALSE	B	Mobile	FALSE	1	1	0	0	0	0	0	0	Pos	Pos	Neg	Neg	Neg
B1936	UM/KWAMOUTH	No	Neg	NA	Neg	Neg	NA	Neg	Neg	Pos	Pos	1+	1+	2+	2+	Pos	Pos	0	0	2+	4+	NA	0	09/12/2015	99	NA	Yes	0	Not ambiguous	Not ambiguous	6417	Neg	FALSE	B	Mobile	FALSE	1	1	1	1	0	0	1	1	Pos	Pos	Pos	Pos	Neg
B3522	UM/KWAMOUTH	No	Neg	NA	Neg	Neg	NA	Neg	Neg	Pos	Pos	1+	2+	0	0	Neg	Neg	0	0	0	0	NA	0	15/01/2016	99	NA	Yes	7	Not ambiguous	Not ambiguous	6419	Neg	FALSE	B	Mobile	FALSE	1	1	0	0	0	0	0	0	Pos	Pos	Neg	Neg	Neg
B1903	UM/KWAMOUTH	No	Neg	NA	Neg	Neg	NA	Neg	Neg	Neg	Neg	0	0	0	0	Pos	Pos	3+	3+	0	0	NA	0	09/12/2015	NA	NA	Yes	32	Not ambiguous	Not ambiguous	6423	Neg	FALSE	B	Mobile	FALSE	0	0	0	0	1	1	0	0	Neg	Neg	Neg	Neg	Pos
B1888	UM/KWAMOUTH	No	Neg	NA	Neg	Neg	NA	Neg	Neg	Neg	Neg	0	0	0	0	Pos	Pos	0	0	2+	1+	NA	0	09/12/2015	NA	NA	Yes	60	Not ambiguous	Not ambiguous	6425	Neg	FALSE	B	Mobile	FALSE	0	0	0	0	0	0	1	1	Neg	Neg	Neg	Neg	Neg
B1880	UM/KWAMOUTH	No	Neg	NA	Neg	Neg	NA	Neg	Neg	Pos	Pos	1+	1+	0	0	Neg	Neg	0	0	0	0	NA	0	09/12/2015	99	NA	Yes	73	Not ambiguous	Not ambiguous	6429	Neg	FALSE	B	Mobile	FALSE	1	1	0	0	0	0	0	0	Pos	Pos	Neg	Neg	Neg
L1590	HS/NKARA	No	Neg	Pos	Pos	Pos	Neg	Pos	Pos	Pos	Pos	1+	1+	1+	1+	Pos	Pos	2+	2+	2+	2+	NA	0	16/01/2016	2	432	Yes	22	Not ambiguous	Not ambiguous	6451	Pos	TRUE	L	Fixed	FALSE	1	1	1	1	1	1	1	1	Pos	Pos	Pos	Pos	Pos
L1637	HS/NKARA	No	Neg	Pos	Neg	Pos	NA	Pos	Pos	Pos	Pos	1+	1+	2+	2+	Pos	Pos	1+	1+	2+	2+	NA	0	26/01/2016	4	215	Yes	41	Not ambiguous	Not ambiguous	6453	Pos	TRUE	L	Fixed	FALSE	1	1	1	1	1	1	1	1	Pos	Pos	Pos	Pos	Pos
L1683	HS/NKARA	No	Pos	Neg	NA	NA	NA	Neg	Neg	Pos	Pos	1+	1+	0	0	Neg	Neg	0	0	0	0	NA	0	02/02/2016	3	2	Yes	42	Not ambiguous	Not ambiguous	6455	Pos	TRUE	L	Fixed	FALSE	1	1	0	0	0	0	0	0	Pos	Pos	Neg	Neg	Neg
L1684	HS/NKARA	No	NA	Pos	NA	NA	Pos	Pos	Pos	Pos	Pos	1+	1+	2+	2+	Pos	Pos	1+	1+	2+	2+	NA	0	02/02/2016	4	510	Yes	29	Not ambiguous	Not ambiguous	6457	Pos	TRUE	L	Fixed	FALSE	1	1	1	1	1	1	1	1	Pos	Pos	Pos	Pos	Pos
L1574	HS/NKARA	No	Neg	NA	Neg	Neg	NA	Neg	Neg	Neg	Neg	0	0	0	0	Pos	Pos	0	0	1+	1+	NA	0	13/01/2016	NA	NA	Yes	16	Not ambiguous	Not ambiguous	6460	Neg	FALSE	L	Fixed	FALSE	0	0	0	0	0	0	1	1	Neg	Neg	Neg	Neg	Neg
L1591	HS/NKARA	No	Neg	NA	Neg	Neg	NA	Neg	Neg	Neg	Neg	0	0	0	0	Pos	Pos	1+	1+	0	0	NA	0	16/01/2016	NA	NA	Yes	27	Not ambiguous	Not ambiguous	6462	Neg	FALSE	L	Fixed	FALSE	0	0	0	0	1	1	0	0	Neg	Neg	Neg	Neg	Pos
L1592	HS/NKARA	No	Neg	NA	Neg	Neg	NA	Neg	Neg	Neg	Neg	0	0	0	0	Pos	Pos	2+	2+	0	0	NA	0	17/01/2016	NA	NA	Yes	15	Not ambiguous	Not ambiguous	6465	Neg	FALSE	L	Fixed	FALSE	0	0	0	0	1	1	0	0	Neg	Neg	Neg	Neg	Pos
L1595	HS/NKARA	No	Neg	NA	Neg	Neg	NA	Neg	Neg	Neg	Neg	0	0	0	0	Pos	Pos	0	0	1+	1+	NA	0	18/01/2016	NA	NA	Yes	5	Not ambiguous	Not ambiguous	6467	Neg	FALSE	L	Fixed	FALSE	0	0	0	0	0	0	1	1	Neg	Neg	Neg	Neg	Neg
L1596	HS/NKARA	No	Neg	NA	Neg	Neg	NA	Neg	Neg	Neg	Neg	0	0	0	0	Pos	Pos	1+	1+	0	0	NA	0	18/01/2016	NA	NA	Yes	70	Not ambiguous	Not ambiguous	6470	Neg	FALSE	L	Fixed	FALSE	0	0	0	0	1	1	0	0	Neg	Neg	Neg	Neg	Pos
L1607	HS/NKARA	No	Neg	NA	Neg	Neg	NA	Neg	Neg	Neg	Neg	0	0	0	0	Pos	Pos	1+	2+	0	0	NA	0	20/01/2016	NA	NA	Yes	38	Not ambiguous	Not ambiguous	6473	Neg	FALSE	L	Fixed	FALSE	0	0	0	0	1	1	0	0	Neg	Neg	Neg	Neg	Pos
L1609	HS/NKARA	No	Neg	NA	Neg	Neg	NA	Neg	Neg	Pos	Pos	0	0	2+	2+	Neg	Neg	0	0	0	0	NA	0	20/01/2016	NA	NA	Yes	30	Not ambiguous	Not ambiguous	6479	Neg	FALSE	L	Fixed	FALSE	0	0	1	1	0	0	0	0	Neg	Neg	Pos	Pos	Neg
L1624	HS/NKARA	No	Neg	NA	Neg	Neg	NA	Neg	Neg	Neg	Neg	0	0	0	0	Pos	Pos	1+	1+	1+	1+	NA	0	23/01/2016	NA	NA	Yes	19	Not ambiguous	Not ambiguous	6482	Neg	FALSE	L	Fixed	FALSE	0	0	0	0	1	1	1	1	Neg	Neg	Neg	Neg	Pos
L1627	HS/NKARA	No	Neg	NA	Neg	Neg	NA	Pos	Pos	Neg	Neg	0	0	0	0	Pos	Pos	0	0	1+	1+	NA	0	25/01/2016	NA	NA	Yes	47	Not ambiguous	Not ambiguous	6485	Neg	FALSE	L	Fixed	FALSE	0	0	0	0	0	0	1	1	Neg	Neg	Neg	Neg	Neg
L1633	HS/NKARA	No	Neg	NA	Neg	Neg	NA	Neg	Neg	Neg	Neg	0	0	0	0	Pos	Pos	0	0	1+	1+	NA	0	25/01/2016	NA	NA	Yes	29	Not ambiguous	Not ambiguous	6488	Neg	FALSE	L	Fixed	FALSE	0	0	0	0	0	0	1	1	Neg	Neg	Neg	Neg	Neg
L1641	HS/NKARA	No	Neg	NA	Neg	Neg	NA	Pos	Pos	Pos	Pos	2+	2+	1+	1+	Neg	Neg	0	0	0	0	NA	0	27/01/2016	NA	NA	Yes	32	Not ambiguous	Not ambiguous	6491	Neg	FALSE	L	Fixed	FALSE	1	1	1	1	0	0	0	0	Pos	Pos	Pos	Pos	Neg
L1642	HS/NKARA	No	Neg	NA	Neg	Neg	Neg	Pos	Pos	Pos	Pos	1+	1+	0	0	Pos	Pos	1+	1+	0	0	NA	0	27/01/2016	25	NA	Yes	6	Not ambiguous	Not ambiguous	6494	Neg	FALSE	L	Fixed	FALSE	1	1	0	0	1	1	0	0	Pos	Pos	Neg	Neg	Pos
L1646	HS/NKARA	No	Neg	NA	Neg	Neg	NA	Pos	Pos	Pos	Pos	1+	1+	0	0	Neg	Neg	0	0	0	0	NA	0	27/01/2016	1	NA	Yes	24	Not ambiguous	Not ambiguous	6497	Neg	FALSE	L	Fixed	FALSE	1	1	0	0	0	0	0	0	Pos	Pos	Neg	Neg	Neg
L1651	HS/NKARA	No	Neg	NA	Neg	Neg	Neg	Neg	Neg	Neg	Neg	0	0	0	0	Pos	Pos	0	0	1+	1+	NA	0	27/01/2016	NA	NA	Yes	11	Not ambiguous	Not ambiguous	6500	Neg	FALSE	L	Fixed	FALSE	0	0	0	0	0	0	1	1	Neg	Neg	Neg	Neg	Neg
L1658	HS/NKARA	No	Neg	NA	Neg	Neg	NA	Neg	Neg	Pos	Pos	1+	1+	0	0	Neg	Neg	0	0	0	0	NA	0	28/01/2016	1	NA	Yes	25	Not ambiguous	Not ambiguous	6503	Neg	FALSE	L	Fixed	FALSE	1	1	0	0	0	0	0	0	Pos	Pos	Neg	Neg	Neg
B4180	UM/KWAMOUTH	No	Neg	NA	Neg	Neg	NA	Pos	Pos	Neg	Neg	0	0	0	0	Neg	Neg	0	0	0	0	NA	0	19/01/2016	NA	NA	Yes	29	Not ambiguous	Not ambiguous	6509	Neg	FALSE	B	Mobile	FALSE	0	0	0	0	0	0	0	0	Neg	Neg	Neg	Neg	Neg
B4206	UM/KWAMOUTH	No	Neg	NA	Neg	Neg	NA	Neg	Neg	Neg	Neg	0	0	0	0	Pos	Pos	3+	2+	2+	1+	NA	0	19/01/2016	NA	NA	Yes	6	Not ambiguous	Not ambiguous	6511	Neg	FALSE	B	Mobile	FALSE	0	0	0	0	1	1	1	1	Neg	Neg	Neg	Neg	Pos
B4185	UM/KWAMOUTH	No	Neg	NA	Neg	Neg	NA	Neg	Neg	Neg	Neg	0	0	0	0	Pos	Pos	4+	4+	0	0	NA	0	19/01/2016	NA	NA	Yes	40	Not ambiguous	Not ambiguous	6513	Neg	FALSE	B	Mobile	FALSE	0	0	0	0	1	1	0	0	Neg	Neg	Neg	Neg	Pos
B4174	UM/KWAMOUTH	No	Neg	NA	Neg	Neg	NA	Neg	Neg	Neg	Neg	0	0	0	0	Pos	Pos	0	0	2+	2+	NA	0	19/01/2016	NA	NA	Yes	29	Not ambiguous	Not ambiguous	6515	Neg	FALSE	B	Mobile	FALSE	0	0	0	0	0	0	1	1	Neg	Neg	Neg	Neg	Neg
B4170	UM/KWAMOUTH	No	Neg	NA	Neg	Neg	NA	Neg	Neg	Neg	Neg	0	0	0	0	Pos	Pos	2+	2+	0	0	NA	0	19/01/2016	NA	NA	Yes	5	Not ambiguous	Not ambiguous	6518	Neg	FALSE	B	Mobile	FALSE	0	0	0	0	1	1	0	0	Neg	Neg	Neg	Neg	Pos
B3015	UM/KWAMOUTH	No	Neg	NA	Neg	Neg	NA	Pos	Pos	Pos	Pos	1+	1+	2+	2+	Pos	Pos	0	0	2+	2+	NA	0	22/12/2015	99	NA	Yes	15	Not ambiguous	Not ambiguous	6520	Neg	FALSE	B	Mobile	FALSE	1	1	1	1	0	0	1	1	Pos	Pos	Pos	Pos	Neg
B2981	UM/KWAMOUTH	No	Neg	NA	Neg	Neg	NA	Neg	Neg	Neg	Neg	0	0	0	0	Neg	Neg	0	0	0	0	NA	0	22/12/2015	NA	NA	Yes	50	Not ambiguous	Not ambiguous	6522	Neg	FALSE	B	Mobile	FALSE	0	0	0	0	0	0	0	0	Neg	Neg	Neg	Neg	Neg
B3969	UM/KWAMOUTH	No	Neg	NA	Neg	Neg	NA	Pos	Pos	Neg	Neg	0	0	0	0	Pos	Pos	0	0	1+	1+	NA	0	17/01/2016	NA	NA	Yes	80	Not ambiguous	Not ambiguous	6525	Neg	FALSE	B	Mobile	FALSE	0	0	0	0	0	0	1	1	Neg	Neg	Neg	Neg	Neg
B3957	UM/KWAMOUTH	No	Neg	NA	Neg	Neg	NA	Neg	Neg	Neg	Neg	0	0	0	0	Pos	Pos	0	0	1+	1+	NA	0	17/01/2016	NA	NA	Yes	35	Not ambiguous	Not ambiguous	6527	Neg	FALSE	B	Mobile	FALSE	0	0	0	0	0	0	1	1	Neg	Neg	Neg	Neg	Neg
B3936	UM/KWAMOUTH	No	Neg	NA	Neg	Neg	NA	Pos	Pos	Neg	Neg	0	0	0	0	Neg	Neg	0	0	0	0	NA	0	17/01/2016	NA	NA	Yes	14	Not ambiguous	Not ambiguous	6529	Neg	FALSE	B	Mobile	FALSE	0	0	0	0	0	0	0	0	Neg	Neg	Neg	Neg	Neg
L1663	HS/NKARA	No	Neg	NA	Neg	Neg	NA	Neg	Neg	Neg	Neg	0	0	0	0	Pos	Pos	0	0	2+	2+	NA	0	28/01/2016	NA	NA	Yes	53	Not ambiguous	Not ambiguous	6534	Neg	FALSE	L	Fixed	FALSE	0	0	0	0	0	0	1	1	Neg	Neg	Neg	Neg	Neg
L1666	HS/NKARA	No	Neg	NA	Neg	Neg	NA	Neg	Neg	Pos	Pos	0	0	2+	2+	Neg	Neg	0	0	0	0	NA	0	29/01/2016	NA	NA	Yes	23	Not ambiguous	Not ambiguous	6539	Neg	FALSE	L	Fixed	FALSE	0	0	1	1	0	0	0	0	Neg	Neg	Pos	Pos	Neg
B2837	UM/KWAMOUTH	No	Neg	NA	Neg	Neg	NA	Pos	Pos	Pos	Pos	0	0	1+	1+	Neg	Neg	0	0	0	0	NA	0	21/12/2015	NA	NA	Yes	18	Not ambiguous	Not ambiguous	6545	Neg	FALSE	B	Mobile	FALSE	0	0	1	1	0	0	0	0	Neg	Neg	Pos	Pos	Neg
B2822	UM/KWAMOUTH	No	Neg	NA	Neg	Neg	NA	Pos	Pos	Neg	Neg	0	0	0	0	Neg	Neg	0	0	0	0	NA	0	21/12/2015	NA	NA	Yes	32	Not ambiguous	Not ambiguous	6548	Neg	FALSE	B	Mobile	FALSE	0	0	0	0	0	0	0	0	Neg	Neg	Neg	Neg	Neg
B2781	UM/KWAMOUTH	No	Neg	NA	Neg	Neg	NA	Pos	Pos	Pos	Pos	0	0	1+	1+	Pos	Pos	0	0	1+	1+	NA	0	20/12/2015	NA	NA	Yes	14	Not ambiguous	Not ambiguous	6551	Neg	FALSE	B	Mobile	FALSE	0	0	1	1	0	0	1	1	Neg	Neg	Pos	Pos	Neg
B4005	UM/KWAMOUTH	No	Neg	NA	Neg	Neg	NA	Neg	Neg	Neg	Neg	0	0	0	0	Pos	Pos	2+	2+	4+	4+	NA	0	17/01/2016	NA	NA	Yes	68	Not ambiguous	Not ambiguous	6553	Neg	FALSE	B	Mobile	FALSE	0	0	0	0	1	1	1	1	Neg	Neg	Neg	Neg	Pos
B4158	UM/KWAMOUTH	No	Neg	NA	Neg	Neg	NA	Neg	Neg	Neg	Neg	0	0	0	0	Pos	Pos	4+	4+	0	0	NA	0	19/01/2016	NA	NA	Yes	45	Not ambiguous	Not ambiguous	6555	Neg	FALSE	B	Mobile	FALSE	0	0	0	0	1	1	0	0	Neg	Neg	Neg	Neg	Pos
B4055	UM/KWAMOUTH	No	Neg	NA	Neg	Neg	NA	Neg	Neg	Neg	Neg	0	0	0	0	Pos	Pos	3+	3+	0	0	NA	0	18/01/2016	NA	NA	Yes	15	Not ambiguous	Not ambiguous	6558	Neg	FALSE	B	Mobile	FALSE	0	0	0	0	1	1	0	0	Neg	Neg	Neg	Neg	Pos
B4052	UM/KWAMOUTH	No	Neg	NA	Neg	Neg	NA	Neg	Neg	Pos	Pos	1+	1+	0	0	Neg	Neg	0	0	0	0	NA	0	18/01/2016	99	NA	Yes	32	Not ambiguous	Not ambiguous	6561	Neg	FALSE	B	Mobile	FALSE	1	1	0	0	0	0	0	0	Pos	Pos	Neg	Neg	Neg
B4263	UM/KWAMOUTH	No	Neg	NA	Neg	Neg	NA	Pos	Pos	Pos	Neg	0	0	1+	0	Pos	Pos	1+	1+	2+	2+	NA	0	19/01/2016	NA	NA	Yes	6	Not ambiguous	Not ambiguous	6565	Neg	FALSE	B	Mobile	FALSE	0	0	1	0	1	1	1	1	Neg	Neg	Pos	Neg	Pos
B4396	UM/KWAMOUTH	No	Neg	NA	Neg	Neg	NA	Neg	Neg	Pos	Pos	1+	1+	2+	2+	Neg	Neg	0	0	0	0	NA	0	20/01/2016	99	NA	Yes	10	Not ambiguous	Not ambiguous	6568	Neg	FALSE	B	Mobile	FALSE	1	1	1	1	0	0	0	0	Pos	Pos	Pos	Pos	Neg
B4905	UM/KWAMOUTH	No	Neg	NA	Neg	Neg	NA	Neg	Neg	Neg	Neg	0	0	0	0	Pos	Pos	0	0	4+	4+	NA	0	23/01/2016	NA	NA	Yes	3	Not ambiguous	Not ambiguous	6570	Neg	FALSE	B	Mobile	FALSE	0	0	0	0	0	0	1	1	Neg	Neg	Neg	Neg	Neg
B4902	UM/KWAMOUTH	No	Neg	NA	Neg	Neg	NA	Neg	Neg	Pos	Pos	1+	1+	0	0	Neg	Neg	0	0	0	0	NA	0	23/01/2016	99	NA	Yes	55	Not ambiguous	Not ambiguous	6579	Neg	FALSE	B	Mobile	FALSE	1	1	0	0	0	0	0	0	Pos	Pos	Neg	Neg	Neg
B4942	UM/KWAMOUTH	No	Neg	NA	Neg	Neg	NA	Pos	Pos	Neg	Neg	0	0	0	0	Pos	Pos	0	0	3+	4+	NA	0	23/01/2016	NA	NA	Yes	59	Not ambiguous	Not ambiguous	6581	Neg	FALSE	B	Mobile	FALSE	0	0	0	0	0	0	1	1	Neg	Neg	Neg	Neg	Neg
P1269	HGR/MASIMANIMBA	No	Neg	NA	Neg	Neg	NA	Pos	Pos	Neg	Neg	0	0	0	0	Neg	Neg	0	0	0	0	NA	0	16/12/2015	NA	NA	Yes	13	Ambiguous	Ambiguous	6583	Neg	FALSE	P	Fixed	FALSE	0	0	0	0	0	0	0	0	Neg	Neg	Neg	Neg	Neg
P1326	HGR/MASIMANIMBA	No	Neg	NA	Neg	Neg	NA	Pos	Pos	Neg	Neg	0	0	0	0	Neg	Neg	0	0	0	0	NA	0	29/12/2015	NA	NA	Yes	28	Ambiguous	Ambiguous	6585	Neg	FALSE	P	Fixed	FALSE	0	0	0	0	0	0	0	0	Neg	Neg	Neg	Neg	Neg
P1343	HGR/MASIMANIMBA	No	Neg	NA	Neg	Neg	NA	Pos	Pos	Neg	Neg	0	0	0	0	Neg	Neg	0	0	0	0	NA	0	05/01/2016	NA	NA	Yes	10	Ambiguous	Ambiguous	6587	Neg	FALSE	P	Fixed	FALSE	0	0	0	0	0	0	0	0	Neg	Neg	Neg	Neg	Neg
P1344	HGR/MASIMANIMBA	No	Neg	NA	Neg	Neg	NA	Neg	Neg	Neg	Neg	0	0	0	0	Pos	Pos	0	0	2+	2+	NA	0	05/01/2016	NA	NA	Yes	21	Not ambiguous	Not ambiguous	6589	Neg	FALSE	P	Fixed	FALSE	0	0	0	0	0	0	1	1	Neg	Neg	Neg	Neg	Neg
P1348	HGR/MASIMANIMBA	No	Neg	NA	Neg	Neg	NA	Neg	Neg	Neg	Neg	0	0	0	0	Pos	Pos	1+	1+	0	0	NA	0	05/01/2016	NA	NA	Yes	14	Not ambiguous	Not ambiguous	6591	Neg	FALSE	P	Fixed	FALSE	0	0	0	0	1	1	0	0	Neg	Neg	Neg	Neg	Pos
P1353	HGR/MASIMANIMBA	No	Neg	NA	Neg	Neg	NA	Pos	Pos	Neg	Neg	0	0	0	0	Neg	Neg	0	0	0	0	NA	0	05/01/2016	NA	NA	Yes	41	Ambiguous	Ambiguous	6593	Neg	FALSE	P	Fixed	FALSE	0	0	0	0	0	0	0	0	Neg	Neg	Neg	Neg	Neg
P1418	HGR/MASIMANIMBA	No	Neg	NA	Neg	Neg	NA	Neg	Neg	Pos	Pos	2+	2+	1+	1+	Neg	Neg	0	0	0	0	NA	0	18/01/2016	NA	NA	Yes	27	Not ambiguous	Not ambiguous	6595	Neg	FALSE	P	Fixed	FALSE	1	1	1	1	0	0	0	0	Pos	Pos	Pos	Pos	Neg
P1273	HGR/MASIMANIMBA	No	Neg	NA	Neg	Neg	NA	Neg	Neg	Neg	Neg	0	0	0	0	Pos	Pos	0	0	1+	1+	NA	0	17/12/2015	NA	NA	Yes	57	Not ambiguous	Not ambiguous	6597	Neg	FALSE	P	Fixed	FALSE	0	0	0	0	0	0	1	1	Neg	Neg	Neg	Neg	Neg
P1279	HGR/MASIMANIMBA	No	Neg	Neg	Neg	Neg	NA	Pos	Pos	Neg	Neg	0	0	0	0	Neg	Neg	0	0	0	0	NA	0	18/12/2015	NA	1	Yes	33	Not ambiguous	Not ambiguous	6599	Neg	FALSE	P	Fixed	FALSE	0	0	0	0	0	0	0	0	Neg	Neg	Neg	Neg	Neg
P1284	HGR/MASIMANIMBA	No	Neg	NA	Neg	Neg	NA	Pos	Pos	Neg	Neg	0	0	0	0	Pos	Pos	1+	2+	1+	1+	NA	0	18/12/2015	NA	NA	Yes	39	Not ambiguous	Not ambiguous	6601	Neg	FALSE	P	Fixed	FALSE	0	0	0	0	1	1	1	1	Neg	Neg	Neg	Neg	Pos
P1309	HGR/MASIMANIMBA	No	Neg	NA	Neg	Neg	NA	Neg	Neg	Neg	Neg	0	0	0	0	Pos	Pos	2+	2+	1+	2+	NA	0	22/12/2015	NA	NA	Yes	11	Not ambiguous	Not ambiguous	6603	Neg	FALSE	P	Fixed	FALSE	0	0	0	0	1	1	1	1	Neg	Neg	Neg	Neg	Pos
N2020	MASAMUNA	No	Neg	Pos	Pos	Pos	NA	Pos	Pos	Pos	Pos	2+	2+	2+	2+	Pos	Pos	3+	3+	3+	3+	NA	0	08/02/2016	NA	84	Yes	52	Not ambiguous	Not ambiguous	6619	Pos	TRUE	N	Fixed	FALSE	1	1	1	1	1	1	1	1	Pos	Pos	Pos	Pos	Pos
N1883	MASAMUNA	No	Neg	NA	Neg	Neg	NA	Pos	Pos	Pos	Pos	1+	1+	1+	1+	Neg	Neg	0	0	0	0	NA	0	18/01/2016	2	NA	Yes	35	Not ambiguous	Not ambiguous	6623	Neg	FALSE	N	Fixed	FALSE	1	1	1	1	0	0	0	0	Pos	Pos	Pos	Pos	Neg
N1894	MASAMUNA	No	Neg	NA	Neg	Neg	NA	Neg	Neg	Pos	Pos	1+	1+	1+	1+	Neg	Neg	0	0	0	0	NA	0	19/01/2016	1	NA	Yes	20	Not ambiguous	Not ambiguous	6625	Neg	FALSE	N	Fixed	FALSE	1	1	1	1	0	0	0	0	Pos	Pos	Pos	Pos	Neg
N1918	HS/MASAMUNA	No	Neg	NA	Neg	Neg	NA	Neg	Neg	Pos	Pos	1+	1+	0	0	Pos	Pos	0	0	2+	2+	NA	0	22/01/2016	1	NA	Yes	16	Not ambiguous	Not ambiguous	6629	Neg	FALSE	N	Fixed	FALSE	1	1	0	0	0	0	1	1	Pos	Pos	Neg	Neg	Neg
N1925	HS/MASAMUNA	No	Neg	NA	Neg	Neg	NA	Neg	Neg	Pos	Pos	1+	1+	0	0	Neg	Neg	0	0	0	0	NA	0	23/01/2016	1	NA	Yes	0	Not ambiguous	Not ambiguous	6631	Neg	FALSE	N	Fixed	FALSE	1	1	0	0	0	0	0	0	Pos	Pos	Neg	Neg	Neg
N1938	MASAMUNA	No	Neg	NA	Neg	Neg	NA	Neg	Neg	Neg	Neg	0	0	0	0	Pos	Pos	0	0	2+	2+	NA	0	26/01/2016	NA	NA	Yes	25	Not ambiguous	Not ambiguous	6633	Neg	FALSE	N	Fixed	FALSE	0	0	0	0	0	0	1	1	Neg	Neg	Neg	Neg	Neg
N1949	MASAMUNA	No	Neg	NA	Neg	Neg	NA	Neg	Neg	Neg	Neg	0	0	0	0	Pos	Pos	0	0	2+	2+	NA	0	29/01/2016	NA	NA	Yes	33	Not ambiguous	Not ambiguous	6635	Neg	FALSE	N	Fixed	FALSE	0	0	0	0	0	0	1	1	Neg	Neg	Neg	Neg	Neg
N1957	MASAMUNA	No	Neg	NA	Neg	Neg	NA	Neg	Neg	Neg	Neg	0	0	0	0	Pos	Pos	0	0	2+	2+	NA	0	30/01/2016	NA	NA	Yes	38	Not ambiguous	Not ambiguous	6637	Neg	FALSE	N	Fixed	FALSE	0	0	0	0	0	0	1	1	Neg	Neg	Neg	Neg	Neg
N1958	MASAMUNA	No	Neg	NA	Neg	Neg	NA	Neg	Neg	Neg	Neg	0	0	0	0	Pos	Pos	0	0	2+	2+	NA	0	30/01/2016	NA	NA	Yes	38	Not ambiguous	Not ambiguous	6639	Neg	FALSE	N	Fixed	FALSE	0	0	0	0	0	0	1	1	Neg	Neg	Neg	Neg	Neg
N1989	MASAMUNA	No	Neg	NA	Neg	Neg	NA	Pos	Pos	Neg	Neg	0	0	0	0	Pos	Pos	2+	2+	0	0	NA	0	03/02/2016	NA	NA	Yes	19	Not ambiguous	Not ambiguous	6641	Neg	FALSE	N	Fixed	FALSE	0	0	0	0	1	1	0	0	Neg	Neg	Neg	Neg	Pos
N2000	MASAMUNA	No	Neg	NA	Neg	Neg	NA	Pos	Pos	Pos	Pos	1+	1+	2+	1+	Pos	Pos	2+	2+	2+	2+	NA	0	04/02/2016	1	NA	Yes	12	Not ambiguous	Not ambiguous	6645	Neg	FALSE	N	Fixed	FALSE	1	1	1	1	1	1	1	1	Pos	Pos	Pos	Pos	Pos
N2049	MASAMUNA	No	Neg	NA	Neg	Neg	NA	Neg	Neg	Neg	Neg	0	0	0	0	Pos	Pos	1+	1+	2+	2+	NA	0	11/02/2016	NA	NA	Yes	40	Not ambiguous	Not ambiguous	6647	Neg	FALSE	N	Fixed	FALSE	0	0	0	0	1	1	1	1	Neg	Neg	Neg	Neg	Pos
N2068	MASAMUNA	No	Neg	NA	Neg	Neg	NA	Neg	Neg	Neg	Neg	0	0	0	0	Pos	Pos	0	0	2+	2+	NA	0	15/02/2016	NA	NA	Yes	23	Not ambiguous	Not ambiguous	6650	Neg	FALSE	N	Fixed	FALSE	0	0	0	0	0	0	1	1	Neg	Neg	Neg	Neg	Neg
L1573	HS/NKARA	No	Neg	NA	Neg	Neg	NA	Neg	Neg	Pos	Pos	0	0	1+	1+	Neg	Neg	0	0	0	0	NA	0	13/01/2016	NA	NA	Yes	65	Not ambiguous	Not ambiguous	6653	Neg	FALSE	L	Fixed	FALSE	0	0	1	1	0	0	0	0	Neg	Neg	Pos	Pos	Neg
P1432	HGR/MASIMANIMBA	No	Neg	NA	Neg	Neg	NA	Neg	Pos	Neg	Neg	0	0	0	0	Pos	Pos	1+	1+	0	0	NA	0	19/01/2016	NA	NA	Yes	65	Not ambiguous	Not ambiguous	6666	Neg	FALSE	P	Fixed	FALSE	0	0	0	0	1	1	0	0	Neg	Neg	Neg	Neg	Pos
P1375	HGR/MASIMANIMBA	No	Neg	NA	Neg	Neg	NA	Pos	Pos	Pos	Pos	1+	1+	0	0	Neg	Neg	0	0	0	0	NA	0	08/01/2016	99	NA	Yes	13	Ambiguous	Ambiguous	6669	Neg	FALSE	P	Fixed	FALSE	1	1	0	0	0	0	0	0	Pos	Pos	Neg	Neg	Neg
P1378	HGR/MASIMANIMBA	No	Neg	NA	Neg	Neg	NA	Neg	Neg	Neg	Neg	0	0	0	0	Pos	Pos	1+	1+	0	0	NA	0	11/01/2016	NA	NA	Yes	23	Not ambiguous	Not ambiguous	6672	Neg	FALSE	P	Fixed	FALSE	0	0	0	0	1	1	0	0	Neg	Neg	Neg	Neg	Pos
P1379	HGR/MASIMANIMBA	No	Neg	NA	Neg	Neg	NA	Neg	Neg	Neg	Neg	0	0	0	0	Pos	Pos	0	0	2+	2+	NA	0	11/01/2016	NA	NA	Yes	17	Not ambiguous	Not ambiguous	6674	Neg	FALSE	P	Fixed	FALSE	0	0	0	0	0	0	1	1	Neg	Neg	Neg	Neg	Neg
P1388	HGR/MASIMANIMBA	No	Neg	NA	Neg	Neg	NA	Neg	Neg	Neg	Neg	0	0	0	0	Pos	Pos	0	0	2+	2+	NA	0	11/01/2016	NA	NA	Yes	37	Not ambiguous	Not ambiguous	6676	Neg	FALSE	P	Fixed	FALSE	0	0	0	0	0	0	1	1	Neg	Neg	Neg	Neg	Neg
P1395	HGR/MASIMANIMBA	No	Neg	NA	Neg	Neg	NA	Pos	Pos	Neg	Neg	0	0	0	0	Neg	Neg	0	0	0	0	NA	0	12/01/2016	NA	NA	Yes	33	Ambiguous	Ambiguous	6678	Neg	FALSE	P	Fixed	FALSE	0	0	0	0	0	0	0	0	Neg	Neg	Neg	Neg	Neg
P1407	HGR/MASIMANIMBA	No	Neg	NA	Neg	Neg	NA	Pos	Pos	Pos	Pos	2+	2+	0	0	Neg	Neg	0	0	0	0	NA	0	14/01/2016	NA	NA	Yes	19	Not ambiguous	Not ambiguous	6680	Neg	FALSE	P	Fixed	FALSE	1	1	0	0	0	0	0	0	Pos	Pos	Neg	Neg	Neg
P1431	HGR/MASIMANIMBA	No	Neg	NA	Neg	Neg	NA	Pos	Pos	Neg	Neg	0	0	0	0	Neg	Neg	0	0	0	0	NA	0	19/01/2016	NA	NA	Yes	33	Ambiguous	Ambiguous	6682	Neg	FALSE	P	Fixed	FALSE	0	0	0	0	0	0	0	0	Neg	Neg	Neg	Neg	Neg
N2022	MASAMUNA	No	Neg	Pos	Pos	Pos	NA	Pos	Pos	Pos	Pos	2+	2+	2+	2+	Pos	Pos	3+	3+	3+	3+	NA	0	08/02/2016	NA	84	Yes	52	Not ambiguous	Not ambiguous	6686	Pos	TRUE	N	Fixed	FALSE	1	1	1	1	1	1	1	1	Pos	Pos	Pos	Pos	Pos
P1435	HGR/MASIMANIMBA	No	Neg	NA	Neg	Neg	NA	Pos	Pos	Neg	Neg	0	0	0	0	Neg	Neg	0	0	0	0	NA	0	19/01/2016	NA	NA	Yes	39	Ambiguous	Ambiguous	6688	Neg	FALSE	P	Fixed	FALSE	0	0	0	0	0	0	0	0	Neg	Neg	Neg	Neg	Neg
P1436	HGR/MASIMANIMBA	No	Neg	NA	Neg	Neg	NA	Neg	Neg	Neg	Neg	0	0	0	0	Pos	Pos	0	0	3+	3+	NA	0	20/01/2016	NA	NA	Yes	49	Not ambiguous	Not ambiguous	6691	Neg	FALSE	P	Fixed	FALSE	0	0	0	0	0	0	1	1	Neg	Neg	Neg	Neg	Neg
P1450	HGR/MASIMANIMBA	No	Neg	NA	Neg	Neg	NA	Neg	Neg	Pos	Pos	1+	1+	0	0	Pos	Pos	1+	0	2+	2+	NA	0	21/01/2016	99	NA	Yes	34	Not ambiguous	Not ambiguous	6697	Neg	FALSE	P	Fixed	FALSE	1	1	0	0	1	0	1	1	Pos	Pos	Neg	Neg	Pos
P1504	HGR/MASIMANIMBA	No	Neg	NA	Neg	Neg	NA	Pos	Pos	Neg	Neg	0	0	0	0	Neg	Neg	0	0	0	0	NA	0	01/02/2016	NA	NA	Yes	60	Not ambiguous	Not ambiguous	6699	Neg	FALSE	P	Fixed	FALSE	0	0	0	0	0	0	0	0	Neg	Neg	Neg	Neg	Neg
P1507	HGR/MASIMANIMBA	No	Neg	NA	Neg	Neg	NA	Pos	Pos	Neg	Neg	0	0	0	0	Pos	Pos	0	0	2+	2+	NA	0	01/02/2016	NA	NA	Yes	40	Ambiguous	Ambiguous	6702	Neg	FALSE	P	Fixed	FALSE	0	0	0	0	0	0	1	1	Neg	Neg	Neg	Neg	Neg
P1510	HGR/MASIMANIMBA	No	Neg	NA	Neg	Neg	NA	Pos	Pos	Neg	Neg	0	0	0	0	Neg	Neg	0	0	0	0	NA	0	01/02/2016	NA	NA	Yes	63	Ambiguous	Ambiguous	6713	Neg	FALSE	P	Fixed	FALSE	0	0	0	0	0	0	0	0	Neg	Neg	Neg	Neg	Neg
P1513	HGR/MASIMANIMBA	No	Neg	NA	Neg	Neg	NA	Neg	Neg	Neg	Neg	0	0	0	0	Pos	Pos	0	0	1+	1+	NA	0	03/02/2016	NA	NA	Yes	54	Not ambiguous	Not ambiguous	6717	Neg	FALSE	P	Fixed	FALSE	0	0	0	0	0	0	1	1	Neg	Neg	Neg	Neg	Neg
P1514	HGR/MASIMANIMBA	No	Neg	NA	Neg	Neg	NA	Neg	Neg	Neg	Neg	0	0	0	0	Pos	Pos	1+	1+	0	0	NA	0	03/02/2016	NA	NA	Yes	4	Not ambiguous	Not ambiguous	6719	Neg	FALSE	P	Fixed	FALSE	0	0	0	0	1	1	0	0	Neg	Neg	Neg	Neg	Pos
P1518	HGR/MASIMANIMBA	No	Neg	NA	Neg	Neg	NA	Neg	Neg	Neg	Neg	0	0	0	0	Pos	Pos	2+	3+	2+	2+	NA	0	04/02/2016	NA	NA	Yes	21	Not ambiguous	Not ambiguous	6722	Neg	FALSE	P	Fixed	FALSE	0	0	0	0	1	1	1	1	Neg	Neg	Neg	Neg	Pos
P1539	HGR/MASIMANIMBA	No	Neg	NA	Neg	Neg	NA	Neg	Neg	Pos	Pos	2+	2+	0	0	Neg	Neg	0	0	0	0	NA	0	10/02/2016	NA	NA	Yes	30	Not ambiguous	Not ambiguous	6725	Neg	FALSE	P	Fixed	FALSE	1	1	0	0	0	0	0	0	Pos	Pos	Neg	Neg	Neg
P1540	HGR/MASIMANIMBA	No	Neg	NA	Neg	Neg	NA	Neg	Neg	Neg	Neg	0	0	0	0	Pos	Pos	0	0	4+	4+	NA	0	10/02/2016	NA	NA	Yes	37	Not ambiguous	Not ambiguous	6727	Neg	FALSE	P	Fixed	FALSE	0	0	0	0	0	0	1	1	Neg	Neg	Neg	Neg	Neg
P1377	HGR/MASIMANIMBA	No	Neg	Pos	Pos	Pos	Neg	Pos	Pos	Pos	Pos	0	0	1+	1+	Pos	Pos	2+	2+	2+	2+	NA	0	11/01/2016	NA	623	Yes	27	Not ambiguous	Not ambiguous	6729	Pos	TRUE	P	Fixed	FALSE	0	0	1	1	1	1	1	1	Neg	Neg	Pos	Pos	Pos
P1554	HGR/MASIMANIMBA	No	NA	Pos	NA	NA	Pos	Pos	Pos	Pos	Pos	2+	2+	2+	2+	Pos	Pos	2+	2+	3+	3+	NA	0	13/02/2016	NA	45	Yes	31	Not ambiguous	Not ambiguous	6731	Pos	TRUE	P	Fixed	FALSE	1	1	1	1	1	1	1	1	Pos	Pos	Pos	Pos	Pos
P1557	HGR/MASIMANIMBA	Yes	NA	Pos	NA	NA	Pos	Pos	Pos	Neg	Neg	0	0	0	0	Pos	Pos	1+	1+	3+	3+	NA	0	15/02/2016	NA	7	Yes	26	Not ambiguous	Not ambiguous	6733	Pos	TRUE	P	Fixed	FALSE	0	0	0	0	1	1	1	1	Neg	Neg	Neg	Neg	Pos
P1558	HGR/MASIMANIMBA	No	Neg	Pos	Pos	Pos	NA	Pos	Pos	Neg	Neg	0	0	0	0	Pos	Pos	0	0	2+	2+	NA	0	15/02/2016	NA	100	Yes	1	Not ambiguous	Not ambiguous	6735	Pos	TRUE	P	Fixed	FALSE	0	0	0	0	0	0	1	1	Neg	Neg	Neg	Neg	Neg
P1408	HGR/MASIMANIMBA	No	Neg	NA	Neg	Neg	NA	Pos	Pos	Neg	Neg	0	0	0	0	Pos	Pos	2+	2+	0	0	NA	0	14/01/2016	NA	NA	Yes	20	Ambiguous	Ambiguous	6737	Neg	FALSE	P	Fixed	FALSE	0	0	0	0	1	1	0	0	Neg	Neg	Neg	Neg	Pos
A5232	UM/BANDUNDU	No	Neg	NA	Neg	Neg	Neg	Neg	Neg	Pos	Pos	3+	3+	3+	3+	Neg	Neg	0	0	0	0	NA	0	16/01/2016	NA	NA	Yes	9	Not ambiguous	Not ambiguous	6745	Neg	FALSE	A	Mobile	FALSE	1	1	1	1	0	0	0	0	Pos	Pos	Pos	Pos	Neg
A5315	UM/BANDUNDU	No	Neg	NA	Neg	Neg	NA	Neg	Neg	Neg	Neg	0	0	0	0	Pos	Pos	2+	2+	0	0	NA	0	16/01/2016	NA	NA	Yes	21	Not ambiguous	Not ambiguous	6748	Neg	FALSE	A	Mobile	FALSE	0	0	0	0	1	1	0	0	Neg	Neg	Neg	Neg	Pos
A5346	UM/BANDUNDU	No	Neg	NA	Neg	Neg	NA	Neg	Neg	Neg	Neg	0	0	0	0	Pos	Pos	0	0	2+	2+	NA	0	16/01/2016	NA	NA	Yes	16	Not ambiguous	Not ambiguous	6751	Neg	FALSE	A	Mobile	FALSE	0	0	0	0	0	0	1	1	Neg	Neg	Neg	Neg	Neg
A5391	UM/BANDUNDU	No	Neg	NA	Neg	Neg	NA	Neg	Neg	Neg	Neg	0	0	0	0	Pos	Pos	2+	2+	0	0	NA	0	16/01/2016	NA	NA	Yes	5	Not ambiguous	Not ambiguous	6754	Neg	FALSE	A	Mobile	FALSE	0	0	0	0	1	1	0	0	Neg	Neg	Neg	Neg	Pos
A5419	UM/BANDUNDU	No	Neg	NA	Neg	Neg	NA	Neg	Neg	Pos	Pos	3+	3+	2+	2+	Neg	Neg	0	0	0	0	NA	0	16/01/2016	NA	NA	Yes	17	Not ambiguous	Not ambiguous	6757	Neg	FALSE	A	Mobile	FALSE	1	1	1	1	0	0	0	0	Pos	Pos	Pos	Pos	Neg
A5426	UM/BANDUNDU	No	Neg	NA	Neg	Neg	NA	Neg	Neg	Neg	Neg	0	0	0	0	Neg	Neg	0	0	0	0	NA	0	16/01/2016	NA	NA	Yes	34	Not ambiguous	Not ambiguous	6759	Neg	FALSE	A	Mobile	FALSE	0	0	0	0	0	0	0	0	Neg	Neg	Neg	Neg	Neg
A5461	UM/BANDUNDU	No	Neg	NA	Neg	Neg	NA	Pos	Pos	Neg	Neg	0	0	0	0	Pos	Pos	0	0	3+	3+	NA	0	16/01/2016	NA	NA	Yes	10	Not ambiguous	Not ambiguous	6763	Neg	FALSE	A	Mobile	FALSE	0	0	0	0	0	0	1	1	Neg	Neg	Neg	Neg	Neg
A5463	UM/BANDUNDU	No	Neg	NA	Neg	Neg	NA	Neg	Neg	Neg	Neg	0	0	0	0	Pos	Pos	3+	3+	2+	2+	NA	0	16/01/2016	NA	NA	Yes	61	Not ambiguous	Not ambiguous	6765	Neg	FALSE	A	Mobile	FALSE	0	0	0	0	1	1	1	1	Neg	Neg	Neg	Neg	Pos
A5485	UM/BANDUNDU	No	Neg	NA	Neg	Neg	NA	Pos	Pos	Neg	Neg	0	0	0	0	Neg	Neg	0	0	0	0	NA	0	10/01/2016	NA	NA	Yes	9	Not ambiguous	Not ambiguous	6767	Neg	FALSE	A	Mobile	FALSE	0	0	0	0	0	0	0	0	Neg	Neg	Neg	Neg	Neg
A5497	UM/BANDUNDU	No	Neg	Pos	Pos	Pos	Neg	Pos	Pos	Pos	Pos	3+	3+	3+	3+	Pos	Pos	2+	2+	3+	3+	NA	0	18/01/2016	NA	15	Yes	9	Not ambiguous	Not ambiguous	6770	Pos	TRUE	A	Mobile	FALSE	1	1	1	1	1	1	1	1	Pos	Pos	Pos	Pos	Pos
A5860	UM/BANDUNDU	No	Neg	NA	Neg	Neg	NA	Neg	Neg	Neg	Neg	0	0	0	0	Pos	Pos	2+	2+	1+	1+	NA	0	17/01/2016	NA	NA	Yes	14	Not ambiguous	Not ambiguous	6773	Neg	FALSE	A	Mobile	FALSE	0	0	0	0	1	1	1	1	Neg	Neg	Neg	Neg	Pos
A5865	UM/BANDUNDU	No	Neg	NA	Neg	Neg	NA	Pos	Pos	Pos	Pos	3+	3+	3+	3+	Pos	Pos	1+	1+	3+	3+	NA	0	17/01/2016	NA	NA	Yes	48	Not ambiguous	Not ambiguous	6776	Neg	FALSE	A	Mobile	FALSE	1	1	1	1	1	1	1	1	Pos	Pos	Pos	Pos	Pos
A6084	UM/BANDUNDU	No	Neg	NA	Neg	Neg	NA	Neg	Neg	Pos	Pos	1+	1+	1+	1+	Neg	Neg	0	0	0	0	NA	0	18/01/2016	99	NA	Yes	10	Not ambiguous	Not ambiguous	6779	Neg	FALSE	A	Mobile	FALSE	1	1	1	1	0	0	0	0	Pos	Pos	Pos	Pos	Neg
A6097	UM/BANDUNDU	No	Neg	NA	Neg	Neg	NA	Neg	Neg	Neg	Neg	0	0	0	0	Pos	Pos	0	0	2+	2+	NA	0	18/01/2016	NA	NA	Yes	33	Not ambiguous	Not ambiguous	6781	Neg	FALSE	A	Mobile	FALSE	0	0	0	0	0	0	1	1	Neg	Neg	Neg	Neg	Neg
A6715	UM/BANDUNDU	No	Neg	NA	Neg	Neg	NA	Neg	Neg	Neg	Neg	0	0	0	0	Pos	Pos	2+	2+	2+	2+	NA	0	19/01/2016	NA	NA	Yes	1	Not ambiguous	Not ambiguous	6784	Neg	FALSE	A	Mobile	FALSE	0	0	0	0	1	1	1	1	Neg	Neg	Neg	Neg	Pos
A6713	UM/BANDUNDU	No	Neg	NA	Neg	Neg	NA	Neg	Neg	Neg	Neg	0	0	0	0	Pos	Pos	3+	3+	4+	4+	NA	0	19/01/2016	NA	NA	Yes	4	Not ambiguous	Not ambiguous	6786	Neg	FALSE	A	Mobile	FALSE	0	0	0	0	1	1	1	1	Neg	Neg	Neg	Neg	Pos
A4773	UM/BANDUNDU	No	Neg	NA	Neg	Neg	NA	Neg	Neg	Pos	Pos	3+	2+	2+	2+	Pos	Pos	0	0	3+	3+	NA	0	15/01/2016	NA	NA	Yes	42	Not ambiguous	Not ambiguous	6789	Neg	FALSE	A	Mobile	FALSE	1	1	1	1	0	0	1	1	Pos	Pos	Pos	Pos	Neg
A4793	UM/BANDUNDU	No	Neg	NA	Neg	Neg	NA	Neg	Neg	Neg	Neg	0	0	0	0	Pos	Pos	1+	1+	0	0	NA	0	15/01/2016	NA	NA	Yes	51	Not ambiguous	Not ambiguous	6791	Neg	FALSE	A	Mobile	FALSE	0	0	0	0	1	1	0	0	Neg	Neg	Neg	Neg	Pos
A4804	UM/BANDUNDU	No	Neg	NA	Neg	Neg	NA	Neg	Neg	Pos	Pos	0	0	3+	3+	Pos	Pos	3+	3+	2+	2+	NA	0	15/01/2016	NA	NA	Yes	30	Not ambiguous	Not ambiguous	6794	Neg	FALSE	A	Mobile	FALSE	0	0	1	1	1	1	1	1	Neg	Neg	Pos	Pos	Pos
A4822	UM/BANDUNDU	No	Neg	NA	Neg	Neg	NA	Pos	Pos	Neg	Neg	0	0	0	0	Pos	Pos	2+	2+	0	0	NA	0	15/01/2016	NA	NA	Yes	19	Not ambiguous	Not ambiguous	6797	Neg	FALSE	A	Mobile	FALSE	0	0	0	0	1	1	0	0	Neg	Neg	Neg	Neg	Pos
A4884	UM/BANDUNDU	No	Neg	NA	Neg	Neg	NA	Neg	Neg	Neg	Neg	0	0	0	0	Pos	Pos	0	0	2+	3+	NA	0	15/01/2016	NA	NA	Yes	12	Not ambiguous	Not ambiguous	6800	Neg	FALSE	A	Mobile	FALSE	0	0	0	0	0	0	1	1	Neg	Neg	Neg	Neg	Neg
A4900	UM/BANDUNDU	No	Neg	NA	Neg	Neg	Neg	Neg	Neg	Pos	Pos	3+	3+	3+	3+	Neg	Neg	0	0	0	0	NA	0	15/01/2016	NA	NA	Yes	14	Not ambiguous	Not ambiguous	6803	Neg	FALSE	A	Mobile	FALSE	1	1	1	1	0	0	0	0	Pos	Pos	Pos	Pos	Neg
A5219	UM/BANDUNDU	No	Neg	NA	Neg	Neg	NA	Neg	Neg	Neg	Neg	0	0	0	0	Pos	Pos	2+	2+	4+	4+	NA	0	16/01/2016	NA	NA	Yes	10	Not ambiguous	Not ambiguous	6808	Neg	FALSE	A	Mobile	FALSE	0	0	0	0	1	1	1	1	Neg	Neg	Neg	Neg	Pos
A6123	UM/BANDUNDU	No	Neg	NA	Neg	Neg	Neg	Neg	Neg	Neg	Neg	0	0	0	0	Pos	Pos	3+	3+	0	0	NA	0	18/01/2016	NA	NA	Yes	10	Not ambiguous	Not ambiguous	6818	Neg	FALSE	A	Mobile	FALSE	0	0	0	0	1	1	0	0	Neg	Neg	Neg	Neg	Pos
A6132	UM/BANDUNDU	No	Neg	NA	Neg	Neg	NA	Neg	Neg	Neg	Neg	0	0	0	0	Pos	Pos	0	0	2+	2+	NA	0	18/01/2016	NA	NA	Yes	10	Not ambiguous	Not ambiguous	6821	Neg	FALSE	A	Mobile	FALSE	0	0	0	0	0	0	1	1	Neg	Neg	Neg	Neg	Neg
A6184	UM/BANDUNDU	No	Neg	NA	Neg	Neg	NA	Neg	Neg	Pos	Pos	3+	3+	3+	3+	Neg	Neg	0	0	0	0	NA	0	18/01/2016	NA	NA	Yes	17	Not ambiguous	Not ambiguous	6823	Neg	FALSE	A	Mobile	FALSE	1	1	1	1	0	0	0	0	Pos	Pos	Pos	Pos	Neg
A6190	UM/BANDUNDU	No	Neg	NA	Neg	Neg	NA	Neg	Neg	Neg	Neg	0	0	0	0	Pos	Pos	3+	3+	0	0	NA	0	18/01/2016	NA	NA	Yes	8	Not ambiguous	Not ambiguous	6825	Neg	FALSE	A	Mobile	FALSE	0	0	0	0	1	1	0	0	Neg	Neg	Neg	Neg	Pos
A6193	UM/BANDUNDU	No	Neg	NA	Neg	Neg	NA	Neg	Neg	Pos	Pos	3+	3+	3+	3+	Neg	Neg	0	0	0	0	NA	0	18/01/2016	NA	NA	Yes	8	Not ambiguous	Not ambiguous	6827	Neg	FALSE	A	Mobile	FALSE	1	1	1	1	0	0	0	0	Pos	Pos	Pos	Pos	Neg
A6213	UM/BDD	No	Neg	NA	Neg	Neg	NA	Neg	Neg	Neg	Neg	0	0	0	0	Pos	Pos	2+	2+	0	0	NA	0	18/01/2016	NA	NA	Yes	19	Not ambiguous	Not ambiguous	6831	Neg	FALSE	A	Mobile	FALSE	0	0	0	0	1	1	0	0	Neg	Neg	Neg	Neg	Pos
A6671	UM/BANDUNDU	No	Neg	NA	Neg	Neg	Neg	Neg	Neg	Neg	Neg	0	0	0	0	Pos	Pos	0	0	3+	3+	NA	0	20/01/2016	NA	NA	Yes	19	Not ambiguous	Not ambiguous	6835	Neg	FALSE	A	Mobile	FALSE	0	0	0	0	0	0	1	1	Neg	Neg	Neg	Neg	Neg
A6640	UM/BDD	No	Neg	NA	Neg	Neg	NA	Neg	Neg	Neg	Neg	0	0	0	0	Pos	Pos	2+	2+	2+	2+	NA	0	19/01/2016	NA	NA	Yes	6	Not ambiguous	Not ambiguous	6837	Neg	FALSE	A	Mobile	FALSE	0	0	0	0	1	1	1	1	Neg	Neg	Neg	Neg	Pos
A6695	UM/BANDUNDU	No	Neg	NA	Neg	Neg	NA	Neg	Neg	Neg	Neg	0	0	0	0	Pos	Pos	2+	2+	0	0	NA	0	19/01/2016	NA	NA	Yes	6	Not ambiguous	Not ambiguous	6839	Neg	FALSE	A	Mobile	FALSE	0	0	0	0	1	1	0	0	Neg	Neg	Neg	Neg	Pos
A6700	UM/BANDUNDU	No	Neg	NA	Neg	Neg	NA	Neg	Neg	Pos	Pos	3+	3+	2+	2+	Neg	Neg	0	0	0	0	NA	0	19/01/2016	NA	NA	Yes	20	Not ambiguous	Not ambiguous	6842	Neg	FALSE	A	Mobile	FALSE	1	1	1	1	0	0	0	0	Pos	Pos	Pos	Pos	Neg
A8040	UM/BDD	No	Neg	NA	Neg	Neg	NA	Neg	Neg	Neg	Neg	0	0	0	0	Pos	Pos	3+	3+	0	0	NA	0	23/01/2016	NA	NA	Yes	71	Not ambiguous	Not ambiguous	6844	Neg	FALSE	A	Mobile	FALSE	0	0	0	0	1	1	0	0	Neg	Neg	Neg	Neg	Pos
A8078	UM/BDD	No	Neg	NA	Neg	Neg	NA	Neg	Neg	Neg	Neg	0	0	0	0	Pos	Pos	4+	2+	0	0	NA	0	24/01/2016	NA	NA	Yes	16	Not ambiguous	Not ambiguous	6846	Neg	FALSE	A	Mobile	FALSE	0	0	0	0	1	1	0	0	Neg	Neg	Neg	Neg	Pos
A8292	UM/BANDUNDU	No	Neg	NA	Neg	Neg	Neg	Neg	Neg	Neg	Neg	0	0	0	0	Neg	Neg	0	0	0	0	NA	0	25/01/2016	NA	NA	Yes	75	Not ambiguous	Not ambiguous	6848	Neg	FALSE	A	Mobile	FALSE	0	0	0	0	0	0	0	0	Neg	Neg	Neg	Neg	Neg
A7626	UM/BDD	No	Neg	NA	Neg	Neg	NA	Pos	Pos	Neg	Neg	0	0	0	0	Neg	Neg	0	0	0	0	NA	0	23/01/2016	NA	NA	Yes	31	Not ambiguous	Not ambiguous	6850	Neg	FALSE	A	Mobile	FALSE	0	0	0	0	0	0	0	0	Neg	Neg	Neg	Neg	Neg
A9455	UM/BDD	No	Neg	NA	Neg	Neg	NA	Neg	Neg	Neg	Neg	0	0	0	0	Pos	Pos	0	0	2+	2+	NA	0	12/02/2016	NA	NA	Yes	2	Not ambiguous	Not ambiguous	6855	Neg	FALSE	A	Mobile	FALSE	0	0	0	0	0	0	1	1	Neg	Neg	Neg	Neg	Neg
L1706	HS/NKARA	No	Neg	Pos	Pos	Pos	Neg	Pos	Pos	Pos	Pos	2+	2+	1+	1+	Pos	Pos	1+	1+	2+	2+	NA	0	10/02/2016	NA	217	Yes	19	Not ambiguous	Not ambiguous	6857	Pos	TRUE	L	Fixed	FALSE	1	1	1	1	1	1	1	1	Pos	Pos	Pos	Pos	Pos
L1721	HS/NKARA	No	Neg	NA	Neg	Neg	NA	Neg	Neg	Neg	Neg	0	0	0	0	Pos	Pos	1+	1+	1+	1+	NA	0	12/02/2016	NA	NA	Yes	17	Not ambiguous	Not ambiguous	6860	Neg	FALSE	L	Fixed	FALSE	0	0	0	0	1	1	1	1	Neg	Neg	Neg	Neg	Pos
L1752	HS/NKARA	No	Neg	NA	Neg	Neg	NA	Neg	Neg	Pos	Pos	2+	2+	2+	2+	Neg	Neg	0	0	0	0	NA	0	15/02/2016	NA	NA	Yes	28	Not ambiguous	Not ambiguous	6863	Neg	FALSE	L	Fixed	FALSE	1	1	1	1	0	0	0	0	Pos	Pos	Pos	Pos	Neg
L1755	HS/NKARA	No	Neg	NA	Neg	Neg	NA	Neg	Neg	Pos	Pos	1+	1+	0	0	Pos	Pos	0	0	1+	1+	NA	0	15/02/2016	4	NA	Yes	68	Not ambiguous	Not ambiguous	6866	Neg	FALSE	L	Fixed	FALSE	1	1	0	0	0	0	1	1	Pos	Pos	Neg	Neg	Neg
A9490	UM/BDD	No	Neg	NA	Neg	Neg	NA	Pos	Pos	Neg	Neg	0	0	0	0	Neg	Neg	0	0	0	0	NA	0	12/02/2016	NA	NA	Yes	13	Not ambiguous	Not ambiguous	6868	Neg	FALSE	A	Mobile	FALSE	0	0	0	0	0	0	0	0	Neg	Neg	Neg	Neg	Neg
A9494	UM/BDD	No	Neg	NA	Neg	Neg	NA	Neg	Neg	Neg	Neg	0	0	0	0	Pos	Pos	2+	2+	0	0	NA	0	12/02/2016	NA	NA	Yes	16	Not ambiguous	Not ambiguous	6872	Neg	FALSE	A	Mobile	FALSE	0	0	0	0	1	1	0	0	Neg	Neg	Neg	Neg	Pos
A9511	UM/BDD	No	Neg	NA	Neg	Neg	NA	Neg	Neg	Pos	Pos	3+	3+	0	0	Neg	Neg	0	0	0	0	NA	0	12/02/2016	NA	NA	Yes	35	Not ambiguous	Not ambiguous	6874	Neg	FALSE	A	Mobile	FALSE	1	1	0	0	0	0	0	0	Pos	Pos	Neg	Neg	Neg
A9524	UM/BDD	No	Neg	NA	Neg	Neg	NA	Neg	Neg	Pos	Pos	3+	3+	2+	2+	Neg	Neg	0	0	0	0	NA	0	12/02/2016	NA	NA	Yes	21	Not ambiguous	Not ambiguous	6877	Neg	FALSE	A	Mobile	FALSE	1	1	1	1	0	0	0	0	Pos	Pos	Pos	Pos	Neg
A9527	UM/BDD	No	Neg	NA	Neg	Neg	NA	Neg	Neg	Pos	Pos	3+	3+	1+	2+	Neg	Neg	0	0	0	0	NA	0	12/02/2016	NA	NA	Yes	25	Not ambiguous	Not ambiguous	6880	Neg	FALSE	A	Mobile	FALSE	1	1	1	1	0	0	0	0	Pos	Pos	Pos	Pos	Neg
A9574	UM/BDD	No	Neg	NA	Neg	Neg	NA	Neg	Neg	Neg	Neg	0	0	0	0	Pos	Pos	2+	2+	2+	2+	NA	0	13/02/2016	NA	NA	Yes	1	Not ambiguous	Not ambiguous	6883	Neg	FALSE	A	Mobile	FALSE	0	0	0	0	1	1	1	1	Neg	Neg	Neg	Neg	Pos
A9641	UM/BDD	No	Neg	NA	Neg	Neg	NA	Pos	Pos	Neg	Neg	0	0	0	0	Neg	Neg	0	0	0	0	NA	0	13/02/2016	NA	NA	Yes	30	Not ambiguous	Not ambiguous	6885	Neg	FALSE	A	Mobile	FALSE	0	0	0	0	0	0	0	0	Neg	Neg	Neg	Neg	Neg
A9642	UM/BDD	No	Neg	NA	Neg	Neg	NA	Neg	Neg	Neg	Neg	0	0	0	0	Pos	Pos	2+	2+	0	0	NA	0	13/02/2016	NA	NA	Yes	4	Not ambiguous	Not ambiguous	6888	Neg	FALSE	A	Mobile	FALSE	0	0	0	0	1	1	0	0	Neg	Neg	Neg	Neg	Pos
A9655	UM/BDD	No	Neg	NA	Neg	Neg	Neg	Neg	Neg	Neg	Neg	0	0	0	0	Pos	Pos	0	0	3+	3+	NA	0	13/02/2016	NA	NA	Yes	11	Not ambiguous	Not ambiguous	6890	Neg	FALSE	A	Mobile	FALSE	0	0	0	0	0	0	1	1	Neg	Neg	Neg	Neg	Neg
A9721	UM/BDD	No	Neg	NA	Neg	Neg	NA	Pos	Pos	Neg	Neg	0	0	0	0	Neg	Neg	0	0	0	0	NA	0	13/02/2016	NA	NA	Yes	45	Not ambiguous	Not ambiguous	6893	Neg	FALSE	A	Mobile	FALSE	0	0	0	0	0	0	0	0	Neg	Neg	Neg	Neg	Neg
A9788	UM/BDD	No	Neg	NA	Neg	Neg	NA	Neg	Neg	Neg	Neg	0	0	0	0	Pos	Pos	3+	3+	0	0	NA	0	13/02/2016	NA	NA	Yes	16	Not ambiguous	Not ambiguous	6895	Neg	FALSE	A	Mobile	FALSE	0	0	0	0	1	1	0	0	Neg	Neg	Neg	Neg	Pos
A9791	UM/BDD	No	Neg	NA	Neg	Neg	NA	Neg	Neg	Neg	Neg	0	0	0	0	Pos	Pos	2+	2+	3+	3+	NA	0	13/02/2016	NA	NA	Yes	23	Not ambiguous	Not ambiguous	6898	Neg	FALSE	A	Mobile	FALSE	0	0	0	0	1	1	1	1	Neg	Neg	Neg	Neg	Pos
A9815	UM/BDD	No	Neg	NA	Neg	Neg	NA	Neg	Neg	Neg	Neg	0	0	0	0	Pos	Pos	2+	2+	0	0	NA	0	13/02/2016	NA	NA	Yes	14	Not ambiguous	Not ambiguous	6901	Neg	FALSE	A	Mobile	FALSE	0	0	0	0	1	1	0	0	Neg	Neg	Neg	Neg	Pos
A9819	UM/BDD	No	Neg	NA	Neg	Neg	NA	Neg	Neg	Neg	Neg	0	0	0	0	Pos	Pos	3+	3+	0	0	NA	0	13/02/2016	NA	NA	Yes	37	Not ambiguous	Not ambiguous	6904	Neg	FALSE	A	Mobile	FALSE	0	0	0	0	1	1	0	0	Neg	Neg	Neg	Neg	Pos
A10054	UM/BDD	No	Neg	NA	Neg	Neg	NA	Neg	Neg	Neg	Neg	0	0	0	0	Pos	Pos	3+	4+	0	0	NA	0	14/02/2016	NA	NA	Yes	50	Not ambiguous	Not ambiguous	6906	Neg	FALSE	A	Mobile	FALSE	0	0	0	0	1	1	0	0	Neg	Neg	Neg	Neg	Pos
[truncated: 54,567 more rows]
[truncated: 61 more columns]
